# Supplementary material for: Ovarian-derived SERPINA1 contributes to zona pellucida integrity and serves as a serum indicator of follicular health in primary ovarian insufficiency
Source: Research Square preprint supplement (doi:10.21203/rs.3.rs-8074469/v1), 2025-11-12
Supplement: Supplementary file 1 [file 94552f4adb4c1de07c1126c5.xlsx]

## Sheet: C.vs.DB
Accession	Gene Symbol	Protein name	ENTREZID	C1	C2	C4	C5	C6	C7	C8	C9	C10	C11	DB-1	DB-2	DB-3	DB-4	DB-5	DB-6	DB-7	DB-8	DB-9	DB-10	DB-11	ttestPvalue	ControlMean	ControlSD	ControlSE	ControlCV	TestMean	TestSD	TestSE	TestCV	FC	Log2FC	fdr	threshold
P35749	MYH11	Myosin-11	4629	627402	1.36322e+06	203181	1.02968e+06	472907	505601	441699	931926	487908	411110	250.019	250.019	250.019	1.55107e+06	1.67015e+06	2.3439e+06	1.53498e+06	1.49406e+06	3.73185e+06	2.42168e+06	1.17336e+06	0.0498025	1.44744e+06	1.15757e+06	349020	79.9738	647464	351404	111124	54.274	0.447318	-1.16063	0.545029	Down
Q9NP78	ABCB9	ABC-type oligopeptide transporter ABCB9	23457	167344	250.019	103103	135813	250.019	345674	157272	146957	29098.8	109478	624999	598562	703515	250.019	159334	99823.8	250.019	274692	364918	223553	223904	0.0479786	297618	247704	74685.6	83.2288	119524	101584	32123.6	84.9903	0.401602	-1.31616	0.541952	Down
A0A0F7TAT3	IGHV4-39	IGHV4-39 protein (Fragment)	28394	127327	250.019	223530	20686	250.019	250.019	250.019	266581	250.019	195255	250.019	250.019	250.019	250.019	250.019	250.019	19803.9	250.019	250.019	250.019	250.019	0.0222203	2027.65	5895.72	1777.63	290.767	83463	108595	34340.7	130.111	41.1625	5.36326	0.480694	Up
P01034	CST3	Cystatin-C	1471	250.019	234630	176904	161159	250.019	250.019	103598	40519.8	250.019	89994.8	495602	411521	368919	177071	168425	55214.2	250.019	263506	203291	175389	268837	0.00957823	235275	147899	44593.3	62.8622	80780.5	86626.3	27393.6	107.237	0.343345	-1.54227	0.399045	Down
A0A125U0V1		MS-F1 heavy chain variable region (Fragment)		250.019	1.50564e+06	1.49155e+06	70658.5	2.13448e+06	1.37582e+06	704795	1070713	3.19347e+06	1.00733e+06	462181	785223	1.03605e+06	210675	903541	264517	381469	1.5815e+06	240108	250.019	535294	0.0483245	581891	458322	138189	78.7642	1.25547e+06	945140	298880	75.2817	2.15757	1.10941	0.541952	Up
P05019	IGF1	Insulin-like growth factor I	3479	144172	132960	151346	21173.7	241117	12007.6	76597.1	114419	81839.3	141442	1.06524e+06	1.30357e+06	773072	137432	109366	411974	198168	204603	139406	184014	155246	0.032311	425644	424011	127844	99.6164	111707	67475.4	21337.6	60.4038	0.262443	-1.92992	0.491199	Down
P08637	FCGR3A	Low affinity immunoglobulin gamma Fc region receptor III-A	2214	250.019	12914.1	250.019	7808.22	250.019	250.019	250.019	250.019	45594.9	66226.9	8419.63	86783.6	60718.2	16577.7	40015.8	107996	59267	250.019	43852.5	34763.3	43027.6	0.0178214	45606.5	32317.6	9744.13	70.8619	13404.4	23324.3	7375.8	174.005	0.293915	-1.76653	0.448818	Down
A0A2U8J8Z4	IgH	Ig heavy chain variable region (Fragment)		215591	246968	106700	428865	158464	251688	57274.1	274515	110178	402134	199419	99698.8	85850.5	9351.07	235298	158969	129827	250.019	250.019	250.019	24822.4	0.00688346	85816.9	86176.1	25983.1	100.419	225238	123112	38931.6	54.6589	2.62463	1.39212	0.373322	Up
A0A5C2FTP6		IGL c348_light_IGKV1-39_IGKJ2 (Fragment)		68358.9	87880.7	105429	78302.3	409334	17207.6	47365.5	59202.9	183558	206619	250.019	7475.34	250.019	47725.9	62104.4	66577.9	116222	52974.5	34521.4	34431.9	56800.2	0.0346956	43575.8	34137	10292.7	78.3394	126326	115491	36521.5	91.4233	2.89899	1.53555	0.503086	Up
A0A5C2FU34		IGL c74_light_IGKV3-20_IGKJ4 (Fragment)		235374	276845	244680	1.37057e+06	182931	115307	140042	631888	356435	631286	250.019	250.019	250.019	197748	40746.1	17336	484817	543088	66894.6	181132	47999.7	0.0486271	143683	195845	59049.4	136.304	418535	381498	120640	91.1507	2.91291	1.54246	0.542685	Up
A0A5C2FU97		IGL c322_light_IGKV3-20_IGKJ1 (Fragment)		1.02132e+06	839656	2.53775e+06	1.41442e+06	1.26237e+06	380386	1.70407e+06	962306	860519	954891	109297	198156	348380	286073	368815	514981	513373	445434	343980	342762	587528	0.000251268	368980	141775	42746.7	38.4234	1.19377e+06	592407	187335	49.6248	3.23533	1.69391	0.136671	Up
A0A5C2FUA0		IGL c568_light_IGKV3-20_IGKJ4 (Fragment)		10649453	5.1172e+06	13738983	7919189	4038092	2.71637e+06	8851715	11576256	8961863	10677844	9179.41	5129052	408315	5657642	2.42482e+06	9967524	3.73394e+06	9624418	5016545	3419645	2.06975e+06	0.0120662	4.31462e+06	3.26579e+06	984673	75.6913	8.4247e+06	3.52284e+06	1.11402e+06	41.8156	1.95259	0.965391	0.403458	Up
A0A5C2FVB0		IGL c961_light_IGKV1D-39_IGKJ2 (Fragment)		250.019	250.019	23740.2	122536	36156.2	250.019	100056	55394.7	39483.8	26678	1914.96	250.019	250.019	250.019	250.019	250.019	10146.1	25687.1	24204.1	250.019	8735.96	0.0172118	6562.57	9773.56	2946.84	148.929	40479.4	41966.4	13270.9	103.673	6.16823	2.62486	0.442328	Up
A0A5C2FVE3		IGL c574_light_IGKV3-15_IGKJ5 (Fragment)		925900	1.61974e+06	1.07756e+06	493779	516950	2.53167e+06	1440101	1.38846e+06	1.37272e+06	690708	741734	335065	411029	506341	1.12127e+06	645095	743925	200259	1.02175e+06	574413	815508	0.0133623	646945	281026	84732.5	43.4389	1.20576e+06	613460	193993	50.8775	1.86377	0.898228	0.413416	Up
A0A5C2FVE4		IGL c40_light_IGKV3-20_IGKJ2 (Fragment)		3.0827e+06	1.77712e+06	2197761	1.89651e+06	1.79733e+06	1.69525e+06	1.56413e+06	1311454	1.77453e+06	1.03754e+06	96025.9	2.54122e+06	96059.2	712596	900622	1.38496e+06	645660	2.40256e+06	684677	1.38716e+06	1.15906e+06	0.0285159	1.09187e+06	807764	243550	73.9796	1.81343e+06	547604	173168	30.1971	1.66084	0.731916	0.483328	Up
A0A5C2FVF5		IGL c50_light_IGKV1-5_IGKJ4 (Fragment)		1.00976e+06	1.78894e+06	698433	1.65185e+06	2.09183e+06	1.45962e+06	1.63579e+06	1732527	2.14698e+06	3169734	1.82533e+06	225990	748903	914727	783882	927441	1.32066e+06	1.09629e+06	490233	1356209	1.19161e+06	0.00651772	989207	440095	132693	44.4896	1.73855e+06	670930	212167	38.5914	1.75752	0.813538	0.373322	Up
A0A5C2FVP1		IGL c872_light_IGKV1D-17_IGKJ1 (Fragment)		1.53809e+06	1.24168e+06	1.87429e+06	2.41722e+06	1420051	1.59966e+06	1.56014e+06	1.82942e+06	1.26584e+06	2.09466e+06	674480	730335	214203	1.42058e+06	961990	1577808	1.3366e+06	999998	817976	599751	1230455	0.000442057	960379	406303	122505	42.3065	1.68411e+06	372311	117735	22.1073	1.75358	0.810306	0.181306	Up
A0A5C2FVY3		IGL c1171_light_IGKV3-11_IGKJ4 (Fragment)		1.21001e+06	1.5414e+06	811955	1.15551e+06	631562	1.46573e+06	1.3629e+06	1.18734e+06	567693	906745	295040	422757	385996	762539	41735.3	450782	1.03423e+06	193206	851334	1.54854e+06	828246	0.0140455	619491	435362	131267	70.2774	1.08408e+06	340113	107553	31.3733	1.74996	0.807323	0.413416	Up
A0A5C2FW89		IGL c1082_light_IGKV3-20_IGKJ3 (Fragment)		10502938	2.27501e+06	3.07227e+06	803414	8531510	4.49646e+06	5203739	5.00041e+06	4.1418e+06	7646067	459098	1.18517e+06	250.019	2.52034e+06	5.15251e+06	879130	29391.3	1.43425e+06	26538.6	4426235	175675	0.00254386	1.48078e+06	1.81246e+06	546476	122.399	5.16736e+06	2.9676e+06	938439	57.4298	3.48962	1.80307	0.31754	Up
A0A5C2FWN5		IGL c1508_light_IGKV3-11_IGKJ4 (Fragment)		252337	39072.7	40516.7	36677.5	4448.33	162065	216244	30307	75551.5	14994.5	750331	451679	250.019	27273.9	250.019	142888	308207	434255	1431681	798333	250.019	0.0481618	395036	451907	136255	114.396	87221.5	89448.6	28286.1	102.553	0.220794	-2.17923	0.541952	Down
A0A5C2FWW0		IGL c1578_light_IGKV1-5_IGKJ1 (Fragment)		415224	634116	250.019	410452	414267	763005	47757.4	612944	90292.9	289507	46893	23140.5	250.019	189291	76583.4	424261	406931	193568	247471	250.019	250.019	0.0283695	146263	159189	47997.3	108.838	367782	261214	82603.1	71.0242	2.51453	1.33029	0.483328	Up
A0A5C2FX01		IGL c726_light_IGKV1D-39_IGKJ1 (Fragment)		1.50161e+06	1.24996e+06	1.84027e+06	793162	576816	1.005e+06	745628	1.04225e+06	934156	1.25855e+06	196841	475096	166887	907772	606408	427761	1.10818e+06	1.02086e+06	311194	294424	599118	0.00244259	555867	328768	99127.4	59.1451	1.09474e+06	378588	119720	34.5824	1.96943	0.977777	0.31754	Up
A0A5C2FX94		IGL c1234_light_IGKV3-20_IGKJ2 (Fragment)		3.35515e+06	2.92881e+06	4.2534e+06	2.39888e+06	1.64753e+06	1.1927e+06	1189336	2.80815e+06	1.37455e+06	1.49537e+06	1.06152e+06	751068	1.07487e+06	2.08968e+06	1.39639e+06	1.80039e+06	1.59793e+06	614274	712962	963021	2.04523e+06	0.0131637	1.28248e+06	534911	161282	41.709	2.26439e+06	1.05246e+06	332818	46.4789	1.76563	0.820181	0.413416	Up
A0A5C2FXN1		IGL c1679_light_IGLV3-21_IGLJ3 (Fragment)		99235.7	363071	85055.9	210153	102791	54343.5	230611	76338.7	60105.6	117559	849082	552389	353533	141052	104768	100117	139785	235300	352266	350119	427115	0.0258983	327775	226751	68368	69.1789	139926	98451.4	31133.1	70.3594	0.426898	-1.22804	0.480694	Down
A0A5C2FXN5		IGL c1768_light_IGKV3-15_IGKJ1 (Fragment)		250.019	250.019	250.019	616753	696584	492096	575145	114501	510039	596167	187079	167810	11669.3	559989	250.019	118558	338455	250.019	250.019	250.019	250.019	0.0381736	125892	181976	54868	144.55	360203	292454	92482	81.1913	2.86121	1.51663	0.521888	Up
A0A5C2FXR8		IGL c415_light_IGKV3-20_IGKJ2 (Fragment)		422221	247840	579492	374416	335346	254324	384137	367910	374300	155062	250.019	41052.8	8574.14	528931	116243	147925	239823	280381	110864	48295.1	250.019	0.00275971	138417	160288	48328.5	115.8	349505	114678	36264.3	32.8115	2.52501	1.33629	0.324086	Up
A0A5C2FXS4		IGL c1141_light_IGKV3-20_IGKJ4 (Fragment)		4.10293e+06	1.7926e+06	2.86535e+06	3.58159e+06	3.41737e+06	2.17491e+06	4552545	3.27294e+06	1.52822e+06	1.17852e+06	543426	1007537	996995	1.75798e+06	2917050	2.51478e+06	391984	3991992	1.07932e+06	420220	261647	0.0135027	1.4439e+06	1.21632e+06	366736	84.2386	2.8467e+06	1.13624e+06	359311	39.9144	1.97153	0.979315	0.413416	Up
A0A5C2FXX6		IGL c1811_light_IGLV1-40_IGLJ3 (Fragment)		2.45553e+06	1.08536e+06	589820	1.21034e+06	1.13699e+06	721310	796237	252303	991357	1.16987e+06	76995.3	530694	535882	737530	786145	403509	640116	453525	448171	771316	884692	0.0223193	569871	228287	68831.2	40.0595	1.04091e+06	581906	184015	55.9036	1.82657	0.86914	0.480694	Up
A0A5C2FXZ9		IGL c505_light_IGKV3-20_IGKJ5 (Fragment)		1268123	250.019	909404	982670	1.06432e+06	1039816	250.019	250.019	1.05286e+06	675192	250.019	250.019	250.019	250.019	653327	250.019	250.019	250.019	812066	250.019	250.019	0.00508532	133422	298408	89973.4	223.657	699314	504292	159471	72.1124	5.24137	2.38994	0.373322	Up
A0A5C2FYT6		IGL c815_light_IGKV1D-39_IGKJ3 (Fragment)		9281.34	11497.4	842050	478854	119099	162300	1.53114e+06	364336	382903	66209.4	250.019	18056.6	79925.1	250.019	250.019	250.019	354550	250.019	250.019	250.019	16895.8	0.0262219	42834.3	106077	31983.4	247.645	396767	475276	150295	119.787	9.26283	3.21145	0.480694	Up
A0A5C2FYY5		IGL c1376_light_IGKV3-15_IGKJ1 (Fragment)		494178	588742	920540	722672	1.22619e+06	893922	1.30154e+06	856389	1.73974e+06	920168	552330	512037	155990	290060	190992	331757	599294	728496	1.00256e+06	215456	516201	0.00171398	463197	258855	78047.6	55.8843	966408	368855	116642	38.1677	2.08639	1.06101	0.31754	Up
A0A5C2FZV8		IGL c2548_light_IGKV1-5_IGKJ2 (Fragment)		860813	628352	703088	503380	631882	458460	287916	214559	353011	264645	2653.62	250.019	84225.6	301918	331995	293390	395206	284639	395970	299312	279977	0.00532564	242685	144455	43554.7	59.5235	490610	213335	67462.5	43.4836	2.02159	1.01549	0.373322	Up
A0A5C2G041		IGL c2529_light_IGKV3-20_IGKJ1 (Fragment)		276062	513112	362428	1.01066e+06	397249	13752.9	250.019	491124	257008	659403	4678.12	17409.3	150148	250.019	57896.7	250.019	151827	331467	178867	28277.6	370731	0.0109118	117436	133294	40189.6	113.503	398105	299532	94720.3	75.2394	3.38996	1.76127	0.401721	Up
A0A5C2G080		IGL c1940_light_IGKV3-20_IGKJ5 (Fragment)		922472	430402	2.05265e+06	250.019	432716	949726	505897	525205	390875	966989	147849	48888.7	44193.4	388952	250.019	806067	507292	78028	435510	573819	468909	0.047057	318160	267581	80678.6	84.1026	717718	558492	176611	77.8149	2.25584	1.17367	0.54058	Up
A0A5C2G0F5		IGL c2030_light_IGKV1-39_IGKJ1 (Fragment)		1.65273e+06	788467	388520	357590	1.1892e+06	655752	864740	1.24307e+06	1.07637e+06	711070	163130	238794	187835	250.019	250.019	250.019	995069	1.08335e+06	726509	250.019	726766	0.00994913	374768	423528	127699	113.011	892752	403234	127514	45.1675	2.38214	1.25226	0.401721	Up
A0A5C2G123		IGL c2674_light_IGKV4-1_IGKJ2 (Fragment)		75134	34877.4	28566.4	166585	196461	250.019	62235.7	36192.4	82522.3	96231.5	458977	250.019	250.019	195396	202737	163906	313541	247446	282650	120568	329438	0.0119826	210469	138576	41782.2	65.8414	77905.6	61990.9	19603.3	79.5719	0.370152	-1.43381	0.403458	Down
A0A5C2G1F7		IGL c163_light_IGKV3-20_IGKJ1 (Fragment)		2.37692e+06	915562	2.61003e+06	396106	1.4871e+06	487624	752241	555927	1.4804e+06	807115	1.00442e+06	27791.9	285467	770989	872685	901404	622359	1013158	643091	346737	388439	0.0418665	625140	325477	98134.9	52.0646	1.1869e+06	784359	248036	66.0845	1.89862	0.924951	0.529338	Up
A0A5C2G1J4		IGL c2326_light_IGKV1-39_IGKJ1 (Fragment)		35366.9	10042.4	733.975	250.019	35001.9	18640.6	12797.9	18576.5	3327.35	1606.52	250.019	793.42	250.019	5577.17	2171.21	250.019	250.019	19098.1	250.019	250.019	250.019	0.0216755	2671.82	5684.18	1713.84	212.745	13634.4	13285	4201.09	97.4375	5.10303	2.35136	0.480694	Up
A0A5C2G1T6		IGL c2874_light_IGKV3-15_IGKJ2 (Fragment)		250.019	250.019	250.019	179170	250.019	250.019	285522	278792	250.019	250.019	526751	409799	359121	768622	250.019	250.019	250.019	159131	152179	621896	281058	0.0247971	298119	264907	79872.4	88.8594	74523.5	122843	38846.3	164.838	0.249979	-2.00012	0.480694	Down
A0A5C2G221		IGL c3321_light_IGKV3-20_IGKJ1 (Fragment)		899364	972482	785433	689695	562658	882079	562687	811945	1.01234e+06	759240	178776	925322	484046	409864	739880	268899	244963	303961	966269	224359	434458	0.00472092	470982	282012	85029.7	59.8774	793792	155597	49204.1	19.6018	1.6854	0.753091	0.373322	Up
A0A5C2G252		IGL c2526_light_IGKV1-17_IGKJ1 (Fragment)		522862	31627778	29486588	866061	559860	34051024	15328770	3.39014e+06	2.10189e+06	1.97028e+06	250.019	250.019	250.019	2.84172e+06	1.45187e+06	924165	1.57109e+06	250.019	496982	631960	250.019	0.0172197	719913	919297	277178	127.696	1.19905e+07	1.4328e+07	4.53091e+06	119.494	16.6555	4.05793	0.442328	Up
A0A5C2G267		IGL c3259_light_IGKV3-11_IGKJ5 (Fragment)		294782	819788	897348	181379	7.65686e+06	576932	5.22032e+06	353244	6.85707e+06	4980161	52284.8	72534.6	44405.1	124447	124793	2645962	132780	203296	184353	169799	192805	0.0184231	358860	760560	229317	211.938	2.78379e+06	3.02325e+06	956036	108.602	7.75731	2.95556	0.455971	Up
A0A5C2G280		IGL c2055_light_IGKV3-20_IGKJ3 (Fragment)		227021	110402	50917.5	25315.4	186179	22907.7	167216	75538.3	224330	89827.1	250.019	250.019	250.019	250.019	250.019	250.019	250.019	67851.8	250.019	86379.7	250.019	0.000663866	14225.6	31368.5	9457.96	220.507	117965	78209	24731.8	66.2982	8.29247	3.0518	0.211773	Up
A0A5C2G2F7		IGL c3104_light_IGKV3-20_IGKJ2 (Fragment)		107307	32102.2	250.019	250.019	250.019	250.019	250.019	250.019	47632	44388.2	11318.6	91352.8	6409.25	63972.7	250.019	108175	100645	75949.8	102589	100161	62896.2	0.0211483	65792.7	41356.9	12469.6	62.8594	23293	35526.6	11234.5	152.521	0.354036	-1.49803	0.480694	Down
A0A5C2G2K3		IGL c3518_light_IGKV3-11_IGKJ1 (Fragment)		8758228	990163	6.37771e+06	4.12535e+06	6405416	4778783	6819395	3.02923e+06	7223877	6.44979e+06	380579	199260	1.60326e+06	2.75975e+06	5.30196e+06	3477832	4483390	3.05222e+06	3.07513e+06	4.33071e+06	2.85786e+06	0.00620478	2.86563e+06	1.61377e+06	486571	56.3148	5.49579e+06	2.27727e+06	720137	41.4367	1.91783	0.939475	0.373322	Up
A0A5C2G346		IGL c2473_light_IGKV3-20_IGKJ3 (Fragment)		19507.9	22579	250.019	15590.5	6109.95	250.019	5022.63	20690.7	250.019	250.019	53737.3	30394.6	72195.8	7603.88	25558.1	5756.06	34971.8	12549	10090.8	116847	17384.3	0.0301748	35189.8	34035.3	10262	96.7192	9050.07	9459.31	2991.3	104.522	0.257179	-1.95916	0.489179	Down
A0A5C2G351		IGL c3354_light_IGKV3-20_IGKJ1 (Fragment)		329226	1.00547e+06	250.019	564348	462404	533320	152509	1.00706e+06	347210	597850	87738.6	330649	26315.9	151751	8506.18	23643.3	548083	250.019	276355	655488	426869	0.0406479	230513	233565	70422.5	101.324	499964	325210	102840	65.0467	2.16892	1.11697	0.529338	Up
A0A5C2G363		IGL c3040_light_IGKV1-5_IGKJ1 (Fragment)		2491861	9677757	1.34675e+06	2028679	2.73389e+06	8090522	2.65206e+06	2.16523e+06	2.52681e+06	2.41531e+06	1.92163e+06	2.64523e+06	423450	1.63211e+06	1.63472e+06	2.05387e+06	2223416	1.97582e+06	1.63934e+06	1.31177e+06	2.11725e+06	0.0488106	1.77987e+06	575727	173588	32.3466	3.61289e+06	2.83115e+06	895290	78.3627	2.02986	1.02138	0.542685	Up
A0A5C2G381		IGL c3374_light_IGLV6-57_IGLJ2 (Fragment)		250.019	250.019	250.019	250.019	250.019	250.019	250.019	39998.3	250.019	250.019	123435	167713	322732	159498	82545.8	49371	109273	602783	250.019	250.019	304197	0.00692185	174732	177255	53444.3	101.444	4224.85	12569.5	3974.83	297.514	0.0241791	-5.3701	0.373322	Down
A0A5C2G393		IGL c3579_light_IGKV1-8_IGKJ1 (Fragment)		1.82002e+06	397631	529311	1.9925e+06	1200360	481367	661403	494318	749046	1.36832e+06	42116	17214.1	80457.8	636799	621826	306259	977089	561773	928793	679410	830221	0.043303	516542	352614	106317	68.2643	969428	587902	185911	60.6442	1.87677	0.908249	0.529338	Up
A0A5C2G3G3		IGL c3150_light_IGLV1-40_IGLJ1 (Fragment)		594818	274226	250.019	83957.2	96556.6	250.019	55250.7	118220	406059	340552	250.019	1.87177e+06	46886.8	3.22351e+06	531940	406531	893507	2.14915e+06	237377	709872	140918	0.0421805	928338	1.04223e+06	314244	112.268	197014	198641	62815.8	100.826	0.212222	-2.23635	0.529338	Down
A0A5C2G3L6		IGL c3878_light_IGKV1-5_IGKJ1 (Fragment)		1388155	262604	596375	650737	718428	414370	538282	412961	487288	609223	42676.7	40146.6	123201	199508	401148	256590	556505	348319	660290	453389	523923	0.0235324	327791	212208	63983.2	64.739	607842	304970	96440.1	50.1726	1.85436	0.890922	0.480694	Up
A0A5C2G3Y2		IGL c3882_light_IGKV1-5_IGKJ5 (Fragment)		1.01743e+06	640024	1.359e+06	1.55123e+06	1.06026e+06	1.01507e+06	1.49431e+06	567749	544075	3.36562e+06	190278	273629	376164	1.12819e+06	437424	609030	902564	486831	1.14091e+06	838568	646116	0.0318796	639064	326983	98589.2	51.166	1.26148e+06	824484	260725	65.3587	1.97394	0.981081	0.489927	Up
A0A5C2G407		IGL c3216_light_IGKV1-33_IGKJ2 (Fragment)		250.019	539236	11614.9	585575	2888.41	250.019	250.019	167925	199300	80416.6	250.019	4729.09	9445.54	250.019	250.019	250.019	250.019	25844.3	250.019	250.019	250.019	0.0338211	3819.92	7870.84	2373.15	206.047	158771	225123	71190	141.791	41.5639	5.37726	0.49541	Up
A0A5C2G427		IGL c2695_light_IGKV3-20_IGKJ1 (Fragment)		3.44569e+06	3576205	2.08981e+06	2816837	2.70236e+06	3.41759e+06	3885515	2.32646e+06	4375439	2.06606e+06	2.42353e+06	2.489e+06	137581	1.05673e+06	2210043	1.14976e+06	2.38328e+06	3.49261e+06	2.00503e+06	2.05355e+06	2115776	0.00700295	1.95608e+06	889593	268222	45.4783	3.0702e+06	789389	249627	25.7114	1.56956	0.650364	0.373322	Up
A0A5C2G4G9		IGL c2835_light_IGLV3-19_IGLJ2 (Fragment)		317368	71934.8	226138	275217	621348	132087	239976	193592	957814	145726	83995.5	250.019	247293	35921	121388	135855	200183	223426	128968	146494	107162	0.0387975	130085	74911.4	22586.6	57.5864	318120	270392	85505.4	84.9968	2.44548	1.29012	0.523166	Up
A0A5C2G4H2		IGL c4092_light_IGKV4-1_IGKJ4 (Fragment)		2.93082e+06	2585153	45381.1	4.29465e+06	3.10947e+06	3142413	2.85695e+06	1.56987e+06	2.74814e+06	3.45203e+06	250.019	250.019	2.3334e+06	1.81607e+06	1.12337e+06	1.88161e+06	1.27918e+06	3.67082e+06	1.44954e+06	1.35857e+06	1573519	0.02247	1.49878e+06	1.01831e+06	307032	67.9427	2.67349e+06	1.14903e+06	363355	42.9787	1.78378	0.834934	0.480694	Up
A0A5C2G561		IGL c3566_light_IGKV4-1_IGKJ2 (Fragment)		246541	323590	238298	165204	190101	102405	107008	108356	329235	209744	250.019	16428.3	250.019	86962.1	171407	61438.7	181020	298629	62842.2	105706	117452	0.0151819	100217	90208.4	27198.8	90.0131	202048	84024.9	26571	41.5866	2.01611	1.01157	0.427325	Up
A0A5C2G5B2		IGL c3616_light_IGLV2-14_IGLJ3 (Fragment)		76433.3	12924.8	98143.1	127196	6567.18	250.019	250.019	143539	91437.3	144834	250.019	250.019	250.019	11401.6	250.019	21240	250.019	250.019	250.019	250.019	94298.4	0.00927757	11721.8	28217.8	8507.97	240.728	70157.5	60169.8	19027.4	85.7639	5.98519	2.5814	0.399045	Up
A0A5C2G6B6		IGH c217_heavy__IGHV3-33_IGHD6-19_IGHJ4 (Fragment)		868011	1150671	491578	1.02946e+06	1.11048e+06	904616	1.00861e+06	1.1072e+06	847227	1.25912e+06	215782	276236	935170	736276	787461	847495	907234	957305	149179	304844	237258	0.00450769	577658	334404	100827	57.8896	977696	215473	68138.6	22.0389	1.69252	0.75917	0.373322	Up
A0A5C2G6G6		IGL c3247_light_IGKV1-9_IGKJ4 (Fragment)		343559	114653	130404	157901	185164	177897	99943.4	57292.2	375082	309780	21635	4201.65	8173.33	124586	156249	156048	71575.3	53931.2	57851.7	161674	106614	0.00874933	83867.3	60292.4	18178.8	71.8902	195167	109578	34651.7	56.1458	2.3271	1.21853	0.399045	Up
A0A5C2G6J9		IGL c3415_light_IGKV1D-13_IGKJ2 (Fragment)		230055	218019	146998	123542	159351	197403	158956	213251	61917.1	162477	530.39	250.019	15006.5	95799.4	195546	182546	212396	250.019	250.019	250.019	138015	0.011227	76440.1	89917.4	27111.1	117.631	167197	50680.7	16026.7	30.312	2.18729	1.12915	0.403458	Up
A0A5C2G6X7		IGL c184_light_IGLV3-21_IGLJ2 (Fragment)		960210	435657	766282	249781	268824	1.56142e+06	35490	1.6353e+06	250.019	1.29229e+06	250.019	250.019	115044	372842	443143	140121	737497	294540	744864	24004.7	250.019	0.0381223	261164	283555	85495.2	108.574	720550	616912	195085	85.6168	2.75899	1.46414	0.521888	Up
A0A5C2G6Y1		IGL c138_light_IGLV3-25_IGLJ2 (Fragment)		83901.1	73137.9	97341.3	184730	163882	128057	55220.4	258270	28948.6	250.019	250.019	250.019	250.019	163967	62664.5	61552.9	250.019	250.019	2817.08	250.019	250.019	0.0108283	26613.8	51786	15614.1	194.583	107374	77849.1	24618	72.5029	4.03452	2.0124	0.401721	Up
A0A5C2G6Y6		IGL c194_light_IGLV2-23_IGLJ1 (Fragment)		250.019	191806	208959	163063	250.019	322344	187159	305574	166922	318677	250.019	250.019	250.019	126390	170301	288396	138284	250.019	139590	250.019	250.019	0.0331935	78587.2	99408.9	29972.9	126.495	186500	115925	36658.6	62.1579	2.37316	1.24681	0.495139	Up
A0A5C2G795		IGL c217_light_IGLV1-44_IGLJ3 (Fragment)		29679.6	250.019	21537.2	250.019	57132.9	250.019	3255.45	182106	136297	250.019	250.019	250.019	250.019	250.019	250.019	6147.09	250.019	250.019	250.019	250.019	250.019	0.0428197	786.116	1778.03	536.097	226.179	43100.8	64792.2	20489.1	150.327	54.8274	5.77683	0.529338	Up
A0A5C2G7A1		IGL c334_light_IGLV2-23_IGLJ1 (Fragment)		4076002	5.69381e+06	3547942	4.63675e+06	2.94823e+06	4.37698e+06	4.14316e+06	3.80466e+06	2914149	8.13755e+06	2436339	1.40345e+06	2.8859e+06	2159215	1.90559e+06	2.53809e+06	2.45792e+06	1.88723e+06	2.54433e+06	2.52047e+06	2.47993e+06	0.000279283	2.29259e+06	416309	125522	18.1589	4.42792e+06	1.53691e+06	486013	34.7094	1.93141	0.949653	0.136671	Up
A0A5C2G7W7		IGL c457_light_IGLV6-57_IGLJ2 (Fragment)		533856	493839	345125	2.66679e+06	1.49194e+06	762614	1.48646e+06	1.158e+06	598016	1.26768e+06	168227	579773	1.01404e+06	932173	608387	334707	316882	240541	483631	510346	1.01845e+06	0.0381417	564287	305135	92001.6	54.0744	1.08043e+06	699925	221336	64.7819	1.91469	0.937109	0.521888	Up
A0A5C2G7Y5		IGL c130_light_IGKV1D-33_IGKJ2 (Fragment)		506450	555125	325191	971285	493240	244912	234796	183725	467312	159955	174076	23115.2	156478	205786	220141	345758	448680	245303	252394	261781	152942	0.0316766	226041	109886	33132	48.6134	414199	243654	77050.3	58.8254	1.83241	0.873738	0.489927	Up
A0A5C2G8D8		IGH + IGL c15_heavy_IGHV4-31_IGHD6-6_IGHJ4 (Fragment)		487000	902406	250.019	3825052	2.97573e+06	2.96954e+06	1.76265e+06	444039	1.57483e+06	2.01468e+06	452184	971271	968421	250.019	1.78743e+06	1.83094e+06	44679.3	328905	40600.2	78402.5	78570.6	0.0220214	598332	694195	209308	116.022	1.69562e+06	1.267e+06	400661	74.722	2.83391	1.50279	0.480694	Up
A0A5C2G8P7		IGH + IGL c174_heavy_IGHV3-15_IGHD3-10_IGHJ4 (Fragment)		69430.4	57101.1	135720	194351	160724	321465	41465.3	142338	41807	179597	250.019	150970	250.019	104675	62095.4	42186.3	250.019	62510.9	158417	50110.1	64438.5	0.0368054	63286.7	55672.5	16785.9	87.9687	134400	87429	27647.5	65.0514	2.12367	1.08656	0.512953	Up
A0A5C2G8V8		IGL c4147_light_IGLV9-49_IGLJ2 (Fragment)		14610.2	250.019	250.019	21042.3	250.019	250.019	13543	8945.55	14773.2	12069.8	250.019	250.019	250.019	250.019	250.019	250.019	9217.54	250.019	250.019	250.019	250.019	0.00698091	1065.25	2703.81	815.229	253.82	8598.41	7778.33	2459.72	90.4625	8.07174	3.01288	0.373322	Up
A0A5C2G9F5		IGL c3043_light_IGLV2-18_IGLJ2 (Fragment)		2.65233e+06	2.22413e+06	7.4162e+06	3.23098e+06	2.95483e+06	3277351	3.14892e+06	4392860	5311549	2.44786e+06	2.84757e+06	9185919	6822670	7.08329e+06	3500387	2.96864e+06	6.46635e+06	4012813	9140518	7981559	6.3239e+06	0.0168893	6.03033e+06	2.35427e+06	709840	39.0405	3.7057e+06	1.5982e+06	505396	43.1282	0.614511	-0.70249	0.442328	Down
A0A5C2G9Y7		IGH + IGL c28_light_IGKV1-12_IGKJ1 (Fragment)		1606589	1.26962e+06	980578	1.30048e+06	969592	502592	927737	525461	1.10424e+06	985303	640926	416398	47780.9	22834.4	1.10153e+06	1.09957e+06	22897.3	599500	852594	641922	859227	0.0135671	573199	404038	121822	70.4883	1.01722e+06	336349	106363	33.0655	1.77464	0.827523	0.413416	Up
A0A5C2GAI5		IGH + IGL c216_light_IGKV3-20_IGKJ2 (Fragment)		250.019	23530	250.019	35433.6	153276	250.019	233147	2733.25	599319	250.019	3.0636e+06	2440122	3.76538e+06	250.019	250.019	14183.6	406253	250.019	4041025	250.019	29336.7	0.0475283	1.25099e+06	1.69703e+06	511674	135.655	104844	191174	60454.6	182.342	0.0838086	-3.57676	0.541952	Down
A0A5C2GAQ0		IGH + IGL c251_heavy_IGHV1-2_IGHD1-26_IGHJ1 (Fragment)		1904086	1.17506e+06	945499	1.16968e+06	2.12018e+06	409521	819827	699853	1.70317e+06	200585	647837	570362	250.019	908008	102371	68198.1	1.071e+06	893020	701773	16653	1.11226e+06	0.0274987	553794	434219	130922	78.4081	1.11475e+06	633127	200212	56.7956	2.01293	1.0093	0.481395	Up
A0A5C2GAQ7		IGH c305_heavy__IGHV4-59B_IGHD7-27_IGHJ4 (Fragment)		250.019	366054	250.019	881855	564426	830219	517486	1.09656e+06	555488	480950	250.019	250.019	72020.3	250.019	298767	581873	328723	435471	250.019	434013	250.019	0.0171708	195647	223166	67287.1	114.066	529354	353941	111926	66.8628	2.70566	1.43598	0.442328	Up
A0A5C2GAT8		IGL c542_light_IGKV1-5_IGKJ1 (Fragment)		1306643	1.17601e+06	1.89232e+06	2.00637e+06	1.56745e+06	999922	1.12049e+06	1.2526e+06	977590	1.48154e+06	1.0491e+06	281864	114363	905013	1.85567e+06	1.62091e+06	1.39354e+06	823364	460408	804445	53149.6	0.0259095	851076	599771	180838	70.4721	1.37809e+06	355463	112407	25.7939	1.61924	0.695314	0.480694	Up
A0A5C2GAX6		IGH + IGL c356_light_IGKV1-5_IGKJ1 (Fragment)		250.019	250.019	250.019	250.019	250.019	250.019	250.019	250.019	250.019	423116	250.019	566804	308249	975604	791963	719758	250.019	250.019	690185	250.019	250.019	0.0205495	368529	386750	116609	104.944	42536.6	133722	42286.6	314.369	0.115423	-3.115	0.480694	Down
A0A5C2GAY3		IGL c582_light_IGKV3-11_IGKJ4 (Fragment)		212793	633877	473648	173270	167374	139905	692408	991501	138087	417368	344974	250.019	295961	47900.8	251034	167724	209635	84779.3	206569	69289.9	229817	0.0249618	173449	109790	33102.8	63.2981	404023	292964	92643.5	72.5118	2.32935	1.21993	0.480694	Up
A0A5C2GBN1		IGH + IGL c28_light_IGKV3-11_IGKJ4 (Fragment)		45602.1	22494.7	250.019	243714	8156.26	250.019	32119.3	298999	168624	138573	250.019	250.019	250.019	45147.6	65941.7	7381.9	14386.4	250.019	3740.51	4013.82	9760.22	0.0247477	13761.1	21657.9	6530.09	157.385	95878.2	109641	34671.6	114.355	6.96733	2.80061	0.480694	Up
A0A5C2GBV5		IGH + IGL c632_light_IGLV2-11_IGLJ1 (Fragment)		350583	346222	2.52593e+06	149029	250.019	476326	224410	935626	686990	250.019	250.019	73986.1	250.019	250.019	250.019	250.019	120420	250.019	196242	250.019	167939	0.0333181	50939.7	76253.7	22991.4	149.694	569561	747284	236312	131.203	11.1811	3.48299	0.495139	Up
A0A5C2GC70		IGH + IGL c54_light_IGKV1D-39_IGKJ4 (Fragment)		304281	409988	296885	509657	205058	466335	362078	405892	250.019	1.01939e+06	250.019	560697	250.019	85581.8	107987	250.019	230231	69039.8	331681	250.019	250.019	0.0116788	126042	180665	54472.5	143.336	397981	262297	82945.7	65.9069	3.15752	1.65879	0.403458	Up
A0A5C2GCE0		IGH + IGL c263_light_IGKV1-27_IGKJ3 (Fragment)		1.22108e+06	931835	567228	615615	504166	416059	760110	835383	448377	596499	134696	291686	302086	414215	667038	389297	1.01755e+06	273530	416875	605934	256976	0.0293752	433626	247266	74553.6	57.023	689636	250309	79154.8	36.2959	1.59039	0.669383	0.487492	Up
A0A5C2GCI2		IGL c4033_light_IGKV3-20_IGKJ1 (Fragment)		52094.4	59951.5	628445	138850	265810	141224	106802	250.019	288330	144144	250.019	250.019	250.019	38119.1	20335.9	124305	96367.4	4177.85	250.019	250.019	250.019	0.0114911	25891.4	43873.5	13228.3	169.452	182590	180449	57063	98.8274	7.05216	2.81806	0.403458	Up
A0A5C2GCL3		IGH + IGL c333_light_IGKV4-1_IGKJ4 (Fragment)		2.80884e+06	3.56908e+06	2700968	1379071	4.09421e+06	708489	5.38659e+06	2.56868e+06	3.56038e+06	2.99015e+06	1.28052e+06	497625	405234	1.60357e+06	1.39593e+06	2.45478e+06	4.33675e+06	2.06549e+06	2.71585e+06	1.52108e+06	2184145	0.0480522	1.86009e+06	1.09873e+06	331279	59.0686	2.97665e+06	1.32145e+06	417879	44.3939	1.60027	0.678316	0.541952	Up
A0A5C2GCW6		IGH + IGL c284_light_IGLV3-1_IGLJ1 (Fragment)		250.019	250.019	64703	250.019	250.019	250.019	250.019	85770.5	250.019	330361	487438	219715	620013	250.019	376868	758716	396837	250.019	250.019	86073.3	250.019	0.0290431	267878	276316	83312.6	103.15	48258.5	104026	32896	215.561	0.180151	-2.47272	0.484908	Down
A0A5C2GDW0		IGH + IGL c207_heavy_IGHV3-53_IGHD2-8_IGHJ2 (Fragment)		587728	125575	1.07426e+06	473011	476396	348080	536862	358242	391735	452826	10864.1	281750	210363	388765	387765	359975	391501	350408	220434	490771	198529	0.0428236	299193	132315	39894.6	44.224	482471	243665	77053.6	50.5035	1.61257	0.689364	0.529338	Up
A0A5C2GDZ7		IGH c221_heavy__IGHV3-48_IGHD4-23_IGHJ6 (Fragment)		93642.9	226628	162542	35028.5	65382.8	68421.3	57994	41072.6	113532	50152.7	3740.78	38530.2	250.019	10685.7	89030.5	19978.4	105711	64976.5	14133	35676.2	60338.9	0.0282244	40277.4	35501.5	10704.1	88.1424	91439.7	61078.8	19314.8	66.7968	2.27025	1.18285	0.483328	Up
A0A5C2GE35		IG c68_heavy_IGHV3-23_IGHD2-15_IGHJ4 (Fragment)		39502.1	250.019	1.36416e+06	6474.45	699049	250.019	662284	17168.8	1179457	16913.1	94006.9	24617.9	256231	10105.3	25791.7	250.019	14004.7	9138.28	11067.4	14804.6	11672.1	0.0420513	42880.9	75097.5	22642.7	175.13	398550	536769	169741	134.68	9.29435	3.21635	0.529338	Up
A0A5C2GES2		IGH c541_heavy__IGHV3-21_IGHD2-8_IGHJ4 (Fragment)		2.4052e+06	1.35207e+06	1.53997e+06	1.61116e+06	2.52153e+06	1.59871e+06	959124	1.58684e+06	1.61576e+06	1.81782e+06	12815.7	948771	247179	1.01747e+06	942626	1.99824e+06	1.5445e+06	1.43709e+06	917618	956906	1.77513e+06	0.0150784	1.07258e+06	598585	180480	55.8081	1.70082e+06	461845	146048	27.1543	1.58573	0.665149	0.427325	Up
A0A5C2GEX7		IG c378_heavy_IGHV3-11_IGHD4-17_IGHJ4 (Fragment)		164530	339383	842665	1.18093e+06	1081664	196268	266476	587170	311912	705602	155192	26092.7	322616	324686	280186	419331	286171	245541	216362	513690	472753	0.036314	296602	140456	42349.2	47.3552	567660	371784	117568	65.4941	1.91388	0.936498	0.509417	Up
A0A5C2GFH4		IG c410_heavy_IGHV3-23_IGHD2-21_IGHJ4 (Fragment)		606026	177667	809568	366822	96134.4	118669	326782	767914	284321	400266	2096996	1.85919e+06	196444	2.1078e+06	274929	354541	3.70798e+06	4.00021e+06	468119	403318	2.86637e+06	0.0120855	1.6669e+06	1.42553e+06	429812	85.5196	395417	255191	80698.3	64.5371	0.237217	-2.07572	0.403458	Down
A0A5C2GFQ6		IG c672_heavy_IGHV3-15_IGHD6-6_IGHJ4 (Fragment)		1096158	768711	1.31913e+06	554082	364658	1.1941e+06	2960332	3.32914e+06	809482	814984	857550	1.18824e+06	468464	402636	523298	427335	136141	418266	615286	245762	543547	0.0215457	529684	287580	86708.6	54.2927	1.32108e+06	1.00621e+06	318193	76.1661	2.49409	1.31851	0.480694	Up
A0A5C2GFU1		IG c675_heavy_IGHV3-15_IGHD5-24_IGHJ3 (Fragment)		250.019	1.21682e+06	250.019	1.21248e+06	1093267	1.99337e+06	1.94098e+06	1.20646e+06	1.46275e+06	2.21048e+06	250.019	698544	250.019	250.019	250.019	250.019	1.33324e+06	1619161	250.019	250.019	250.019	0.00691342	332086	606142	182759	182.526	1.23371e+06	756300	239163	61.3029	3.71503	1.89338	0.373322	Up
A0A5C2GGI7		IGH + IGL c519_light_IGKV1-5_IGKJ4 (Fragment)		5436519	2.4019e+06	2.43427e+06	1.14575e+06	2.48885e+06	1.11146e+06	1.94574e+06	1.53463e+06	2.46559e+06	1.89435e+06	235788	195659	76733.8	1.42947e+06	1.42692e+06	585705	2.06099e+06	1.66753e+06	1214991	1.67058e+06	1.51936e+06	0.0124209	1.09852e+06	696556	210020	63.4086	2.28591e+06	1.22692e+06	387987	53.6734	2.08089	1.0572	0.40989	Up
A0A5C2GGS8		IG c894_heavy_IGHV3-30_IGHD3-3_IGHJ6 (Fragment)		613081	801814	349690	761424	781615	638373	637233	782498	541929	907165	154256	192628	154274	436001	555869	594434	674341	616870	142120	218027	128399	0.00105548	351565	222945	67220.4	63.4149	681482	159892	50562.4	23.4624	1.93842	0.954883	0.233099	Up
A0A5C2GH52		IGH + IGL c65_heavy_IGHV5-51_IGHD5-24_IGHJ5 (Fragment)		250.019	106799	250.019	424927	507715	311150	94239	340384	250.019	250.019	17378.8	250.019	13279.8	250.019	250.019	250.019	130336	250.019	250.019	250.019	250.019	0.0143008	14817.7	38795.7	11697.3	261.82	178621	197834	62560.6	110.756	12.0546	3.59151	0.413416	Up
A0A5C2GHJ3		IGH + IGL c205_heavy_IGHV3-48_IGHD5-24_IGHJ1 (Fragment)		460728	749536	353781	576670	250.019	460888	186348	1.1283e+06	1.20335e+06	540766	240831	314221	255965	250.019	264235	250.019	250.019	111828	579538	234219	126368	0.00822239	193451	173094	52189.9	89.4773	566062	378332	119639	66.8357	2.92613	1.549	0.398604	Up
A0A5C2GHN4		IG c697_heavy_IGHV3-49_IGHD3-10_IGHJ6 (Fragment)		125676	32705.7	38900.3	78606.5	148529	132249	23393	44236.4	82567	24171	325154	250.019	255523	349968	92870.1	298604	18391.6	230643	329932	266958	250.019	0.0157934	197140	140511	42365.6	71.2745	73103.4	47809.3	15118.6	65.3996	0.370819	-1.43121	0.435989	Down
A0A5C2GIX7		IG c873_light_IGLV3-25_IGLJ1 (Fragment)		250.019	14728.9	250.019	89150.8	88909.6	11971.6	15239.3	50225.7	114161	140565	250.019	250.019	250.019	2944.67	250.019	250.019	58151.4	250.019	250.019	250.019	250.019	0.0106681	5758.75	17395.5	5244.93	302.07	52545.2	51800.1	16380.6	98.5821	9.12441	3.18973	0.401721	Up
A0A5C2GJ96		IG c685_light_IGKV1-12_IGKJ4 (Fragment)		20933.7	6513.92	7022.62	43929.1	13516.9	26218.9	40905.2	17363.9	9810.18	11420.8	93657.5	93978.8	52300.1	100228	6053.96	14881.9	53754.9	6404.89	102536	76941.1	37412.4	0.00710973	58013.7	37928.1	11435.7	65.3778	19763.5	13438.4	4249.6	67.996	0.34067	-1.55355	0.373322	Down
A0A5C2GJL6		IG c432_light_IGKV3-20_IGKJ1 (Fragment)		1336358	939522	567108	1.44023e+06	1.05031e+06	2.09399e+06	1.17584e+06	2.06412e+06	993038	1.21646e+06	604032	316767	421085	921637	599456	779535	956151	514620	850031	820819	575289	0.000992105	669038	210124	63354.8	31.4069	1.2877e+06	480718	152016	37.3316	1.9247	0.944633	0.233099	Up
A0A5C2GJT6		IG c831_light_IGKV3-15_IGKJ4 (Fragment)		144660	250.019	157816	1725.09	250.019	184880	250.019	77387.5	250.019	250.019	250.019	8796.32	250.019	250.019	250.019	250.019	250.019	250.019	250.019	250.019	250.019	0.0269902	1026.96	2576.81	776.937	250.917	56772	77298	24443.8	136.155	55.2818	5.78873	0.481117	Up
A0A5C2GJX1		IG c1319_light_IGLV2-14_IGLJ3 (Fragment)		496897	973058	581470	2398263	2.9424e+06	165943	1.38752e+06	2.70678e+06	3.16773e+06	3.83071e+06	250.019	250.019	1.5654e+06	565836	239986	1.53535e+06	810809	1.66698e+06	1931685	250.019	1.33327e+06	0.0437394	877280	752662	226936	85.795	1.86508e+06	1.29719e+06	410208	69.5517	2.12598	1.08813	0.532101	Up
A0A5C2GK02		IG c386_light_IGKV1-9_IGKJ3 (Fragment)		1.38376e+06	1217999	2484306	2.37846e+06	1.61228e+06	2.67414e+06	2305436	1.5066e+06	2.49502e+06	1.87127e+06	52053.9	40122.1	58812.5	2289989	2.06997e+06	738994	276921	1.47878e+06	1.32498e+06	1.6496e+06	1.77765e+06	0.0088418	1.0689e+06	861105	259633	80.5601	1.99293e+06	534551	169040	26.8225	1.86447	0.898765	0.399045	Up
A0A5C2GK17		IGH + IGL c357_light_IGKV1D-39_IGKJ1 (Fragment)		1.91118e+06	1.31636e+06	487967	1.29782e+06	2.12504e+06	649739	974729	609008	1.37161e+06	708741	110524	733687	172598	1183894	386614	238158	1.06945e+06	777098	1.06165e+06	250.019	449667	0.0140358	562145	422959	127527	75.2401	1.14522e+06	561264	177487	49.0093	2.03723	1.02661	0.413416	Up
A0A5C2GK18		IG c286_light_IGKV3-11_IGKJ1 (Fragment)		8647566	7.00034e+06	8432261	12602229	14121316	4.88558e+06	6337989	4.17964e+06	1.0461e+06	7.44483e+06	1.73714e+06	3.86382e+06	2.59413e+06	250.019	8643391	9347814	250.019	471737	18474.6	7035914	8.04411e+06	0.039846	3.79609e+06	3.7774e+06	1.13893e+06	99.5074	7.46979e+06	3.8466e+06	1.2164e+06	51.4955	1.96776	0.976551	0.529338	Up
A0A5C2GKX7		IG c338_light_IGLV6-57_IGLJ3 (Fragment)		250.019	68641.6	82466.6	250.019	250.019	29830.4	250.019	16367.9	250.019	25571.8	250.019	40683	163973	250.019	129199	367605	183037	99450.1	363569	2048.64	18741.7	0.032336	124437	136370	41117.2	109.59	22412.8	30370	9603.85	135.503	0.180114	-2.47302	0.491199	Down
A0A5C2GLJ1		IG c807_light_IGKV3-15_IGKJ4 (Fragment)		2.97152e+06	3.36346e+06	2.10379e+06	2202936	1.62207e+06	1.72103e+06	2166317	3.87596e+06	1.53848e+06	2.53509e+06	2.1455e+06	975886	505912	1.10755e+06	2.06635e+06	1.39379e+06	1.34139e+06	2358489	1584615	1.44587e+06	494470	0.00375383	1.4018e+06	619911	186910	44.2224	2.41007e+06	777471	245858	32.2593	1.71926	0.781791	0.373322	Up
A0A5C2GLM0		IG c402_heavy_IGHV3-21_IGHD3-10_IGHJ6 (Fragment)		1.72092e+06	3.10314e+06	1.85845e+06	380351	1.26008e+06	1.36165e+06	1.14195e+06	3.4273e+06	1.39189e+06	986477	57508.2	807718	2.25482e+06	930838	750484	1.74363e+06	543757	295365	856320	85678.9	957942	0.0312348	844006	664474	200347	78.7286	1.66322e+06	938636	296823	56.4348	1.97063	0.978655	0.489927	Up
A0A5C2GLN1		IG c412_heavy_IGHV3-33_IGHD1-26_IGHJ3 (Fragment)		74687.7	162420	72341	250.019	88729.5	183134	66784.5	205471	92187.6	95596.5	250.019	165242	250.019	250.019	55817.6	250.019	250.019	166120	250.019	250.019	22654.8	0.0273153	37416.8	65673.4	19801.3	175.518	104160	61846.8	19557.7	59.3766	2.78378	1.47705	0.481117	Up
A0A5C2GM87		IG c625_heavy_IGHV3-21_IGHD2-21_IGHJ3 (Fragment)		841606	440490	250.019	711533	739399	250.019	250.019	250.019	93815	176675	146393	250.019	22623.1	47291.6	250.019	250.019	87489.2	250.019	250.019	250.019	80861.9	0.0215499	35105.3	49815.9	15020.1	141.904	300452	348429	110183	115.968	8.55858	3.09737	0.480694	Up
A0A5C2GM92		IG c871_light_IGKV3-20_IGKJ2 (Fragment)		1.08512e+06	1.91788e+06	80661.7	1584430	1.30421e+06	1.58408e+06	1.55683e+06	1.02736e+06	1.10385e+06	1.75734e+06	256629	656116	334808	958374	1.52056e+06	459856	23829.4	374735	1.05386e+06	1193352	886890	0.0115316	701728	457834	138042	65.2438	1.30018e+06	523268	165472	40.246	1.85282	0.889723	0.403458	Up
A0A5C2GMA5		IG c582_heavy_IGHV3-74_IGHD3-16_IGHJ5 (Fragment)		2.50251e+06	1843657	743741	865528	1.89847e+06	940777	635493	3.70626e+06	1.74118e+06	1452128	2.24568e+06	807980	502718	424031	390006	408967	748926	427377	408839	879153	546929	0.0118287	708237	539715	162730	76.2054	1.63298e+06	946791	299402	57.9795	2.30569	1.2052	0.403458	Up
A0A5C2GMI7		IG c992_light_IGKV4-1_IGKJ4 (Fragment)		250.019	250.019	250.019	250.019	250.019	250.019	250.019	250.019	250.019	68830.3	309382	138409	137347	194145	250.019	250.019	113566	250.019	250.019	250.019	250.019	0.0424874	81304.5	105647	31853.9	129.941	7108.04	21687	6858.03	305.105	0.087425	-3.51581	0.529338	Down
A0A5C2GMN4		IG c113_heavy_IGHV3-33_IGHD3-3_IGHJ6 (Fragment)		175330	96381.9	109812	250.019	250.019	250.019	250.019	78356.6	250.019	250.019	2834.99	555.024	27506	250.019	250.019	250.019	250.019	250.019	250.019	250.019	250.019	0.0388138	2990.56	8167.29	2462.53	273.102	46138.1	64067.4	20259.9	138.86	15.4279	3.94747	0.523166	Up
A0A5C2GMQ3		IG c581_heavy_IGHV3-21_IGHD3-16_IGHJ4 (Fragment)		2.39408e+06	1.72506e+06	1766649	940994	1.29682e+06	1.49125e+06	1.93584e+06	2.90111e+06	1.57152e+06	2.14713e+06	1.57369e+06	1054173	1458879	962144	621810	1.13081e+06	822762	1.19679e+06	1.01647e+06	878348	1.15722e+06	0.00100058	1.07937e+06	272915	82286.8	25.2846	1.81705e+06	562411	177850	30.952	1.68343	0.751401	0.233099	Up
A0A5C2GMU7		IG c750_light_IGLV1-47_IGLJ2 (Fragment)		250.019	250.019	152828	70374.3	250.019	2364.25	250.019	3147.74	183546	250.019	9305.7	250.019	738134	218586	5746.23	250.019	165072	366151	184824	401402	463505	0.0255075	232112	239070	72082.3	102.998	41351	70643.7	22339.5	170.839	0.178152	-2.48882	0.480694	Down
A0A5C2GMX7		IG c213_heavy_IGHV3-74_IGHD1-1_IGHJ3 (Fragment)		983155	775715	943591	835453	1.32213e+06	727812	519586	1.42176e+06	563757	565688	4567.88	222386	5482.38	651526	553868	732326	871104	617435	287856	846143	439783	0.00959042	475680	309896	93437.2	65.1481	865865	310268	98115.2	35.8333	1.82027	0.864151	0.399045	Up
A0A5C2GN22		IG c180_light_IGKV3-20_IGKJ3 (Fragment)		250.019	1.98936e+06	14338416	3.27637e+06	3.44552e+06	18767096	19888800	13144589	15046145	18854474	260274	508518	1.11247e+06	4027517	443235	1.99921e+06	2506372	2.67279e+06	12389331	2.14892e+06	2.29413e+06	0.00545359	2.76025e+06	3.39074e+06	1.02235e+06	122.842	1.08751e+07	7.83086e+06	2.47634e+06	72.0073	3.93989	1.97816	0.373322	Up
A0A5C2GNS1		IG c463_heavy_IGHV3-49_IGHD3-10_IGHJ5 (Fragment)		19657.6	178686	60951.8	12377679	3.22164e+06	2.65319e+06	250.019	2807896	12030882	1.60477e+06	32464	160723	15122.8	30530.1	250.019	103893	43862.2	44282.6	250.019	92305.9	36552.6	0.0263757	50930.5	49039.3	14785.9	96.2866	3.49556e+06	4.75714e+06	1.50434e+06	136.091	68.6339	6.10085	0.480694	Up
A0A5C2GP45		IG c1118_heavy_IGHV3-9_IGHD3-16_IGHJ3 (Fragment)		312806	291207	358733	526791	1.27248e+06	277023	742065	518817	294307	392921	1.02037e+06	61856.9	145577	112198	28177.7	258824	67615.8	231401	253718	250.019	250.019	0.0327867	198204	289293	87225.2	145.958	498715	308845	97665.4	61.9281	2.51618	1.33123	0.492831	Up
A0A5C2GP78		IG c759_light_IGKV3-15_IGKJ3 (Fragment)		88988.2	250.019	8276.18	250.019	64768.9	250.019	60183.4	124287	19547.1	8419.93	250.019	12318.7	250.019	250.019	250.019	4935.5	250.019	12490.8	250.019	250.019	250.019	0.0181546	2885.92	4909.32	1480.21	170.113	37522	44254	13994.3	117.941	13.0018	3.70064	0.453233	Up
A0A5C2GPU4		IG c1077_light_IGLV1-40_IGLJ2 (Fragment)		250.019	250.019	250.019	250.019	1.76237e+06	2.59089e+06	1.70113e+06	250.019	2156704	2.85065e+06	250.019	250.019	250.019	250.019	250.019	250.019	250.019	250.019	250.019	2.10816e+06	250.019	0.0408846	191878	635558	191628	331.23	1.1063e+06	1.2134e+06	383712	109.681	5.76565	2.52748	0.529338	Up
A0A5C2GPW8		IG c1212_light_IGKV3-20_IGKJ2 (Fragment)		250.019	51105132	25538236	42733564	15383704	47389900	57170428	11712565	47945932	43162984	91423456	104733240	82818368	35422600	54913524	36525340	43276112	61192368	50271344	45554200	52808464	0.0130655	5.99035e+07	2.30786e+07	6.95845e+06	38.5262	3.42143e+07	1.95331e+07	6.17692e+06	57.0906	0.571156	-0.808043	0.413416	Down
A0A5C2GPX1		IG c754_heavy_IGHV3-23_IGHD1-26_IGHJ4 (Fragment)		250.019	250.019	250.019	250.019	250.019	91575	228046	396760	288727	268157	250.019	250.019	250.019	250.019	46484.2	250.019	250.019	92982	250.019	250.019	250.019	0.024718	12883.3	29968.7	9035.9	232.616	127452	152986	48378.4	120.035	9.89276	3.30637	0.480694	Up
A0A5C2GQJ7		IG c1173_heavy_IGHV3-23_IGHD3-3_IGHJ6 (Fragment)		497411	30539.1	229546	285010	317533	177739	344873	199380	301122	233199	465752	581725	802116	294675	369805	223127	697440	382625	542480	217534	467706	0.010914	458635	187474	56525.6	40.8766	261635	121978	38572.7	46.6213	0.570464	-0.809791	0.401721	Down
A0A5C2GRZ5		IG c294_light_IGKV1-12_IGKJ5 (Fragment)		1.75332e+06	635066	687173	861956	1.12688e+06	601625	964079	706901	707059	561549	126316	325499	108393	482591	331150	271809	488142	592622	198554	167648	440195	0.000244753	321174	163153	49192.5	50.7989	860561	359507	113686	41.7759	2.67942	1.42192	0.136671	Up
A0A5C2GSK5		IG c1470_heavy_IGHV3-20_IGHD6-6_IGHJ4 (Fragment)		250.019	250.019	312647	250.019	67776.9	250.019	164988	250.019	118991	250.019	711759	352970	703125	244070	303537	374702	250.019	94927.6	250.019	318288	250.019	0.0226135	282194	255349	76990.8	90.4873	66590.4	105082	33229.8	157.803	0.235974	-2.0833	0.480694	Down
A0A5C2GT47		IG c517_light_IGKV3-15_IGKJ1 (Fragment)		2.75923e+06	6.08559e+06	4.62644e+06	5.34362e+06	2.96656e+06	3.00117e+06	6.30871e+06	4215284	6491024	2.77262e+06	1.53764e+06	2.06664e+06	2.0207e+06	2.07712e+06	2.92451e+06	1.79331e+06	1.74117e+06	2.31645e+06	1.91998e+06	1584139	1.30322e+06	4.66965e-05	1.93499e+06	436753	131686	22.5713	4.45702e+06	1.53304e+06	484791	34.3962	2.30338	1.20375	0.115406	Up
A0A5C2GTF2		IG c1780_heavy_IGHV4-39_IGHD3-3_IGHJ3 (Fragment)		152900	250.019	900670	783767	250.019	162407	487193	180641	87504.5	57029.4	250.019	250.019	250.019	250.019	100649	250.019	250.019	69966.2	250.019	23796.1	250.019	0.0155213	17855.6	34763.8	10481.7	194.694	281261	327460	103552	116.426	15.752	3.97746	0.432638	Up
A0A5C2GTG7		IG c1800_heavy_IGHV3-23_IGHD1-26_IGHJ3 (Fragment)		4302769	4.22177e+06	7.77747e+06	1.84011e+06	10567375	6.95859e+06	5996187	4060516	5000772	4933520	4.79219e+06	4.0364e+06	8940774	3.1118e+06	2.62815e+06	96291.7	1.53973e+06	3.07732e+06	2103453	2811735	2.76522e+06	0.0353372	3.26391e+06	2.24561e+06	677078	68.8012	5.56591e+06	2.41062e+06	762304	43.3104	1.70529	0.770014	0.509417	Up
A0A5C2GTG9		IG c23_light_IGKV3-11_IGKJ3 (Fragment)		123577	574175	68123.3	959498	97017.2	32837.5	409416	579668	292792	318030	33731	250.019	13189.4	92468	76468.5	97272.6	101100	222393	57492	40095.9	132960	0.00833028	78856.4	62482.9	18839.3	79.2363	345513	293906	92941.3	85.0636	4.38155	2.13144	0.398604	Up
A0A5C2GTM1		IG c824_light_IGKV3-20_IGKJ4 (Fragment)		18486.5	250.019	250.019	115054	111849	250.019	250.019	250.019	72787.3	100010	250.019	250.019	250.019	250.019	250.019	250.019	250.019	250.019	250.019	250.019	250.019	0.0143021	250.019	0	0	0	41943.7	51420.9	16260.7	122.595	167.762	7.39027	0.413416	Up
A0A5C2GTP5		IG c1229_heavy_IGHV3-21_IGHD6-19_IGHJ6 (Fragment)		696572	402159	520003	444465	857927	757500	823939	1.00337e+06	896662	967278	289156	237873	29484.2	504061	458398	523809	485631	509868	435623	281872	400927	0.000285624	377882	153189	46188.1	40.5388	736988	215637	68190.5	29.2593	1.95031	0.963706	0.136671	Up
A0A5C2GTV7		IG c148_light_IGKV1-5_IGKJ2 (Fragment)		2.1281e+06	700925	1.22354e+06	1700540	2.35577e+06	679825	834053	130413	791242	1.18824e+06	53796.9	132877	71467.8	1.59986e+06	649886	356236	790236	458489	305276	671760	493284	0.0161494	507560	438535	132223	86.4006	1.17327e+06	699677	221257	59.635	2.31158	1.20888	0.44157	Up
A0A5C2GU19		IG c1014_light_IGKV3-15_IGKJ1 (Fragment)		194293	168763	6825.83	711063	413529	114991	423077	22297.3	186944	5072.92	250.019	250.019	250.019	250.019	36418.3	250.019	300471	118104	32437.7	83762.5	17927.3	0.0326398	53670.1	90698.8	27346.7	168.993	224686	227485	71937.1	101.246	4.18642	2.06572	0.492831	Up
A0A5C2GU42		IG c1025_light_IGKV1-8_IGKJ2 (Fragment)		2128473	2.00876e+06	3.39001e+06	4675007	2.06395e+06	2.09065e+06	2.45024e+06	6053157	2.91271e+06	2719274	15357975	4.97006e+06	7.64619e+06	2.35504e+06	4.34986e+06	3.56326e+06	4.09745e+06	3.97225e+06	10663862	4.15017e+06	4713221	0.0337899	5.98539e+06	3.84509e+06	1.15934e+06	64.2412	3.04922e+06	1.33704e+06	422811	43.8487	0.509444	-0.973005	0.49541	Down
A0A5C2GU81		IG c867_light_IGKV3-15_IGKJ2 (Fragment)		231656	214565	343295	923399	43958	328487	466567	284323	122555	58246.7	171556	687715	28334.2	250.019	250.019	250.019	62836.7	250.019	250.019	250.019	250.019	0.0460824	86562.9	206085	62137	238.075	301705	255328	80741.9	84.6284	3.48539	1.80132	0.54058	Up
A0A5C2GUB2		IG c1095_light_IGKV3-20_IGKJ2 (Fragment)		250.019	556733	76786.6	236176	293549	9706.36	190476	192391	758914	371382	140486	48849.4	98377.6	162082	69657.5	53800.3	20216.8	396843	250.019	69403.5	10436.8	0.0470725	97309.3	111569	33639.3	114.654	268636	241156	76260.4	89.7706	2.76064	1.465	0.54058	Up
A0A5C2GUD9		IG c1125_light_IGKV1D-17_IGKJ1 (Fragment)		405882	429391	397522	426958	212475	307244	516541	587259	364936	677978	13098.3	37875.5	148371	355316	426095	604424	413138	348103	238468	250.019	278332	0.0303301	260315	194305	58585.1	74.642	432619	134127	42414.7	31.0035	1.6619	0.732835	0.489179	Up
A0A5C2GV12		IG c357_heavy_IGHV3-7_IGHD6-25_IGHJ1 (Fragment)		26226.2	250.019	22495.8	250.019	250.019	250.019	21299.2	29940.4	6896.65	51953.8	250.019	250.019	250.019	250.019	250.019	250.019	250.019	250.019	250.019	250.019	250.019	0.00736531	250.019	0	0	0	15981.2	17438.7	5514.61	109.12	63.9199	5.99819	0.373322	Up
A0A5C2GV93		IG c1485_light_IGLV3-25_IGLJ2 (Fragment)		27101.2	21888.7	12510.6	37541.4	7821.7	250.019	58048.9	177711	130437	43096.4	25819.4	381239	271972	186961	80255.9	132332	112605	53449.3	250.019	318750	37970.2	0.0467686	145600	128169	38644.3	88.0276	51640.7	57730.3	18255.9	111.792	0.354674	-1.49543	0.54058	Down
A0A5C2GVW9		IG c992_light_IGKV3-20_IGKJ4 (Fragment)		317359	96995.3	403842	301186	127672	81050.7	382867	253794	431766	564501	250.019	62587.8	250.019	581858	74560	154007	149112	262479	84060.1	122646	100431	0.0441571	144749	162666	49045.6	112.378	296103	158502	50122.7	53.5293	2.04563	1.03255	0.532285	Up
A0A5C2GW26		IG c787_heavy_IGHV3-30_IGHD5-18_IGHJ1 (Fragment)		259744	275684	232898	583213	460550	191936	294482	242667	269579	255563	160597	98060	71734.8	30234.7	147861	183550	188469	191276	153808	200205	289154	0.00213108	155904	70077.3	21129.1	44.9489	306632	120257	38028.6	39.2187	1.96679	0.975845	0.31754	Up
A0A5C2GW95		IG c1845_light_IGLV1-47_IGLJ3 (Fragment)		960123	242234	340215	500733	385168	748925	810254	675181	904115	817274	770298	2.66136e+06	2561131	616934	754909	906171	583803	1.44804e+06	1.64885e+06	358343	1.44047e+06	0.0298995	1.25003e+06	786046	237002	62.8823	638422	253454	80149.1	39.7	0.510726	-0.969378	0.489179	Down
A0A5C2GXB0		IG c1593_light_IGKV4-1_IGKJ2 (Fragment)		203929	10619.6	108851	52190.5	94950.5	18183.2	14852.4	49625.8	73006.2	24845.7	437618	174762	290362	438390	37978.2	163255	237561	37872.7	22511.7	192861	32765.1	0.0286192	187812	153388	46248.2	81.6708	65105.4	59499.7	18815.5	91.3897	0.346651	-1.52844	0.483328	Down
A0A5C2GXM3		IG c1357_heavy_IGHV5-51_IGHD2-15_IGHJ4 (Fragment)		250.019	84754.5	107052	47158.9	52594.8	250.019	56194.5	250.019	90322.4	250.019	250.019	19586.1	250.019	14055.1	250.019	250.019	250.019	250.019	250.019	250.019	30964.7	0.00892546	6055.1	10663.8	3215.26	176.113	43907.8	41728	13195.5	95.0355	7.25137	2.85825	0.399045	Up
A0A5C2GXT4		IG c520_light_IGKV3-11_IGKJ1 (Fragment)		1.38087e+06	2.78028e+06	1.2909e+06	3129608	2.42773e+06	1.07714e+06	2485341	2.70141e+06	1.44231e+06	1.71857e+06	2600209	137957	1.04429e+06	543905	806861	945735	2.46628e+06	2373167	945439	261887	931422	0.0267493	1.18701e+06	880759	265559	74.1996	2.04342e+06	738206	233441	36.1261	1.72148	0.783647	0.480694	Up
A0A5C2GXV2		IG c540_light_IGKV1-5_IGKJ2 (Fragment)		214646	56232.1	104304	94231.4	5360.66	108011	112675	238077	59029.1	22533.5	7022.46	42895.3	250.019	19162.4	76470.5	5563.95	177686	27479.2	68352.8	250.019	40181.1	0.0479768	42301.3	52025	15686.1	122.987	101510	75288.2	23808.2	74.1682	2.39969	1.26285	0.541952	Up
A0A5C2GZI1		IG c1088_light_IGLV1-40_IGLJ2 (Fragment)		250.019	24749.7	250.019	250.019	115613	250.019	7111.54	36658.2	93954.6	250.019	98159.9	208421	133314	25574.9	14738.7	135342	76335.6	13012.2	208619	250.019	83497.5	0.0313766	90660.5	74909.2	22586	82.6261	27933.7	42685	13498.2	152.808	0.308113	-1.69847	0.489927	Down
A0A5C2GZL2		IG c1118_light_IGLV1-40_IGLJ2 (Fragment)		521451	371510	354591	639127	616804	37570.1	501336	322952	274140	371859	250.019	497598	100246	450080	232752	76594.5	203598	265396	294575	210715	229408	0.0290506	232838	148192	44681.6	63.6462	401134	178260	56370.9	44.4391	1.72281	0.784761	0.484908	Up
A0A5C2H0K9		IG c466_light_IGKV3-20_IGKJ1 (Fragment)		250.019	15672.8	255614	385326	180547	359212	179309	152977	166493	177028	24641.3	25681.7	18141.9	17200.4	102937	163825	162020	109335	27012.9	14995.7	250.019	0.00741184	60549.1	61771.6	18624.8	102.019	187243	124590	39398.8	66.5393	3.09241	1.62873	0.373322	Up
A0A5C2H0U4		IG c1690_light_IGKV3-20_IGKJ2 (Fragment)		250.019	196337	59357.9	250.019	413217	856745	95586.3	250.019	789345	138986	250.019	250.019	250.019	250.019	250.019	250.019	250.019	250.019	250.019	157525	250.019	0.0248978	14547.8	47420.3	14297.8	325.963	255032	324540	102629	127.254	17.5307	4.13181	0.480694	Up
A0A5C2H3I6		IG c1576_light_IGLV3-21_IGLJ2 (Fragment)		250.019	41956.6	2020.63	47577.2	34783.2	47958.6	20138	47595.8	38405.3	48595.7	250.019	250.019	250.019	21120.8	1816.6	2604.76	1696.66	15006	51786.6	22487	7166.69	0.0102054	11312.3	15860.8	4782.22	140.209	32928.1	18864.4	5965.45	57.2897	2.91083	1.54143	0.401721	Up
A0A7S5BXZ0		IGH c261_heavy_IGHV3-23_IGHD2-15_IGHJ4 (Fragment)		342409	32507.9	208365	164809	46441.4	87332.5	182883	150846	115838	195455	228716	32421.9	69285.5	250.019	131132	98186.2	32165.9	32267.7	46567.1	136826	43025.9	0.0408693	77349.5	66335.2	20000.8	85.7603	152689	90275	28547.5	59.1235	1.97401	0.98113	0.529338	Up
A0A7S5BYB8		IGH c658_heavy_IGHV3-53_IGHD3-22_IGHJ3 (Fragment)		230849	242053	458414	298742	488583	150158	167141	224117	519685	94966.4	2.3282e+06	1.20818e+06	675955	614469	362218	1.17497e+06	391242	556437	835801	1.00685e+06	674271	0.00344418	893509	554454	167174	62.0535	287471	150330	47538.6	52.2941	0.321732	-1.63607	0.373322	Down
A0A7S5BYK2		IGH c642_heavy_IGHV3-48_IGHD3-10_IGHJ6 (Fragment)		9248343	6802485	2.93485e+06	2.14796e+06	3.06738e+06	2.48968e+06	3.50601e+06	3.61532e+06	15931332	704922	7059011	1.8157e+06	301068	1.3008e+06	1.40486e+06	1.52238e+06	430884	377242	721115	550753	381539	0.0265596	1.4423e+06	1.93945e+06	584766	134.469	5.04483e+06	4.54367e+06	1.43683e+06	90.0658	3.49776	1.80643	0.480694	Up
A0A7S5BZA6		IGH c1047_heavy_IGHV3-23_IGHD6-19_IGHJ4 (Fragment)		1.12508e+06	512778	815704	502413	1.17127e+06	779523	918202	517808	1.02434e+06	958058	146615	91493.2	266459	787741	677418	589482	785664	548270	886776	646960	477067	0.0173902	536722	266345	80306.1	49.6244	832518	252451	79832	30.3238	1.55112	0.633306	0.442328	Up
A0A7S5BZM3		IGH c1316_heavy_IGHV3-48_IGHD5-24_IGHJ3 (Fragment)		237165	9955.94	250.019	320543	275789	604809	197037	347107	194179	154153	250.019	64515.7	158292	40238.8	57535.7	250.019	3995.17	192962	104262	41444	69854.6	0.00765917	66690.9	63199.7	19055.4	94.7651	234099	174388	55146.3	74.4933	3.51021	1.81156	0.379129	Up
A0A7S5BZR5		IGH c1287_heavy_IGHV4-39_IGHD1-26_IGHJ6 (Fragment)		220447	92028.6	102737	69090.5	34482.6	98771.5	195417	113319	56012.3	158508	62719	72269.8	117698	53646.7	94827.4	63818.1	31947.5	20945.6	250.019	250.019	250.019	0.00683067	47147.5	39950.3	12045.5	84.7347	114081	60078.7	18998.6	52.663	2.41967	1.27481	0.373322	Up
A0A7S5BZY8		IGH c1014_heavy_IGHV3-74_IGHD5-24_IGHJ4 (Fragment)		66402.3	4859.72	95881	14949.3	261880	53383.5	339908	351791	448454	305792	250.019	6972.95	7383.36	104912	204679	160484	59888.4	9617.04	103927	37281.6	69015.6	0.0315372	69491.9	68022.7	20509.6	97.8858	194330	163827	51806.5	84.3033	2.79644	1.48359	0.489927	Up
A0A7S5C040		IGH c905_heavy_IGHV1-18_IGHD3-22_IGHJ3 (Fragment)		806702	370910	361449	523438	567700	283407	454118	365565	187010	353958	250.019	55843.4	19643.5	207120	307184	53742.5	531668	214433	233096	126995	251139	0.00282206	181920	155498	46884.4	85.4762	427426	172810	54647.4	40.4305	2.34953	1.23237	0.324086	Up
A0A7S5C094		IGH c754_heavy_IGHV3-48_IGHD3-10_IGHJ4 (Fragment)		31052086	42336024	99158.6	40472420	27899806	14742073	24143054	21153494	24196234	19972574	10456	568200	166867	11801578	21814186	16275496	15945282	14256237	19204988	19781998	16873308	0.0143723	1.24271e+07	8.27022e+06	2.49356e+06	66.5496	2.46067e+07	1.22481e+07	3.8732e+06	49.7756	1.98008	0.985556	0.413416	Up
A0A7S5C0E2		IGH c1010_heavy_IGHV1-69_IGHD4-17_IGHJ6 (Fragment)		1.41098e+06	1553350	502651	2.05646e+06	502691	1.44551e+06	918525	1.69112e+06	715796	1.54024e+06	219130	237837	273772	141795	920710	537477	1.21487e+06	1.52948e+06	1.19277e+06	968386	533965	0.0281829	706381	480449	144861	68.0156	1.23373e+06	536965	169803	43.5236	1.74656	0.804512	0.483328	Up
A0A7S5C0H7		IGH c1776_heavy_IGHV3-33_IGHD3-10_IGHJ3 (Fragment)		196850	137711	59270.9	227059	25157.3	214125	102479	152452	95697	260277	32411.3	63470.8	16756.5	59422.3	21909	53962.4	127748	120712	31448.9	29579.7	128099	0.0053043	62320	43272.9	13047.3	69.4366	147108	77103.1	24382.1	52.4127	2.36052	1.23911	0.373322	Up
A0A7S5C0Z8		IGH c2046_heavy_IGHV3-15_IGHD3-22_IGHJ3 (Fragment)		25005.4	234079	250.019	88037.3	570812	102947	170870	535098	1.04124e+06	627082	250.019	291349	250.019	24514.3	97416	156968	102457	49548.4	250.019	101414	68263.1	0.0245823	81152.7	86641.9	26123.5	106.764	339542	339877	107478	100.099	4.18399	2.06488	0.480694	Up
A0A7S5C177		IGH c1445_heavy_IGHV3-33_IGHD2-15_IGHJ5 (Fragment)		1.84769e+06	823200	1.80292e+06	1.13954e+06	14539.4	818827	921754	41510.5	751930	953024	130905	111751	53481.5	58194.9	872933	768153	36236.9	770628	78918.2	45978.6	41755.3	0.00719133	269903	345237	104093	127.911	911493	608110	192301	66.7158	3.37711	1.75579	0.373322	Up
A0A7S5C199		IGH c1249_heavy_IGHV3-48_IGHD4-17_IGHJ3 (Fragment)		276559	199768	179618	6703815	4251966	7793781	126827	3.35041e+06	197123	7.98339e+06	903283	621855	217098	2.49474e+06	171053	180878	41852.2	1.46915e+06	1205137	1.53774e+06	90484.4	0.0407704	812115	791576	238669	97.471	3.10633e+06	3.37366e+06	1.06684e+06	108.606	3.82498	1.93545	0.529338	Up
A0A7S5C1F2		IGH c2453_heavy_IGHV4-39_IGHD5-12_IGHJ4 (Fragment)		669973	533113	989787	396337	250.019	526061	1.29016e+06	287651	325558	258067	250.019	250.019	73124.8	250.019	250.019	250.019	250.019	250.019	250.019	250.019	661189	0.00213106	66960.4	198292	59787.4	296.134	527695	377387	119340	71.516	7.88071	2.97833	0.31754	Up
A0A7S5C1H6		IGH c1869_heavy_IGHV5-51_IGHD6-25_IGHJ6 (Fragment)		818054	839807	451693	284818	507612	342922	536787	387595	971013	517342	221092	154991	499072	254205	370963	359200	698643	298453	284618	255259	406964	0.0174096	345769	150691	45434.9	43.5813	565764	231634	73249.1	40.9418	1.63625	0.710392	0.442328	Up
A0A7S5C3B1		IGH c3428_heavy_IGHV3-48_IGHD6-13_IGHJ4 (Fragment)		250.019	29405862	140972384	144101456	15488.1	112980640	86476216	53751.9	86537.2	99863632	38359.1	250.019	97887.2	21066428	22173446	27437398	20554894	16501408	20822152	23634744	26293280	0.0267225	1.62382e+07	1.07986e+07	3.25591e+06	66.5014	6.13956e+07	6.14857e+07	1.94435e+07	100.147	3.78094	1.91874	0.480694	Up
A0A7S5C3M4		IGH c3277_heavy_IGHV3-23_IGHD3-22_IGHJ4 (Fragment)		427106	431870	380700	1.12231e+06	662971	537081	404050	232754	539266	220033	53403.3	26417.7	141623	346363	839905	334027	329121	257250	197092	51258.4	140424	0.0303298	246989	229180	69100.5	92.7895	495814	258148	81633.5	52.0655	2.00743	1.00535	0.489179	Up
A0A7S5C470		IGH c3836_heavy_IGHV3-7_IGHD1-26_IGHJ1 (Fragment)		250.019	551472	261471	378558	10903.4	250.019	250.019	595154	250.019	250.019	25906.1	250.019	250.019	250.019	250.019	250.019	250.019	250.019	250.019	250.019	250.019	0.0273	2582.39	7735.59	2332.37	299.552	179881	246430	77928.1	136.996	69.6568	6.12219	0.481117	Up
A0A7S5C4F1		IGH c4018_heavy_IGHV3-21_IGHD3-22_IGHJ2 (Fragment)		98943.1	362780	133552	285373	120688	59493.9	80452.6	127836	282393	162539	342830	577921	540194	171998	328094	393138	124854	128656	318656	345473	205691	0.0202985	316137	152019	45835.4	48.0864	171405	102177	32311.1	59.6112	0.542186	-0.883139	0.480694	Down
A0A7S5C4I8		IGH c3597_heavy_IGHV4-39_IGHD3-22_IGHJ6 (Fragment)		63698.9	363240	813742	250.019	612661	197514	250.019	68907.3	250.019	50840.2	69725.1	101576	45992.4	250.019	250.019	250.019	250.019	250.019	250.019	250.019	88310	0.0439289	27941.3	40627.4	12249.6	145.403	217135	288367	91189.5	132.805	7.77114	2.95813	0.532151	Up
A0A7S5C4N9		IGH c3802_heavy_IGHV3-23_IGHD6-13_IGHJ1 (Fragment)		1.79308e+06	1.38183e+06	622177	1.34338e+06	2.49731e+06	694726	1.70444e+06	935393	905546	1.38982e+06	888903	624452	1.55983e+06	889165	477388	1.01976e+06	791171	301685	731159	1.0996e+06	486377	0.0200137	806317	348885	105193	43.2689	1.32677e+06	573883	181478	43.2541	1.64547	0.718498	0.478827	Up
A0A7S5ETU3		IGH c1096_heavy_IGHV5-51_IGHD5-24_IGHJ4 (Fragment)		956134	17568.8	2860138	250.019	5843129	78670.2	6.01902e+06	9837520	5862019	1.18955e+06	250.019	250.019	250.019	250.019	866021	1.43285e+06	1.25565e+06	1.30767e+06	1.66158e+06	1.39815e+06	1575919	0.0342423	863531	713188	215034	82.5897	3.2664e+06	3.42107e+06	1.08184e+06	104.735	3.78261	1.91938	0.499034	Up
A0A7S5EU94		IGH c585_heavy_IGHV3-33_IGHD4-4_IGHJ4 (Fragment)		428049	1.94588e+06	215540	315383	994599	960733	327153	1.61336e+06	341558	575295	425778	353952	255813	235249	435980	71108.9	322950	717923	299878	270646	76444.1	0.0257899	315066	178686	53875.8	56.7138	771755	599014	189425	77.6171	2.44951	1.29249	0.480694	Up
A0A7S5EUP5		IGH c2491_heavy_IGHV3-23_IGHD5-12_IGHJ3 (Fragment)		355038	483185	79167.9	349314	607448	752790	254320	278433	358261	233212	72853.1	101473	58568.8	201645	144746	423929	202050	455091	144291	276622	81304.9	0.0241481	196598	136780	41240.7	69.5736	375117	194739	61581.8	51.9142	1.90804	0.932094	0.480694	Up
A0A7S5EVK7		IGH c1082_heavy_IGHV1-69_IGHD4-17_IGHJ2 (Fragment)		106686	250.019	57089.8	123021	85745.9	108856	134579	42405.8	133634	94921.1	4139.27	250.019	250.019	50047.9	250.019	39914	250.019	50760.9	114713	75480.2	65205.3	0.00909879	36478.2	38939.3	11740.6	106.747	88718.8	43518.5	13761.8	49.0522	2.4321	1.2822	0.399045	Up
A0A7S5EVW0		IGH c3639_heavy_IGHV3-48_IGHD5-18_IGHJ6 (Fragment)		131113	204051	235533	41670.7	112940	108493	60376	178886	54923.7	188931	45347.2	159248	157546	29844.9	69225.3	93490.8	36234.1	92620.9	250.019	250.019	250.019	0.0207072	62209.7	58293.6	17576.2	93.705	131692	67901.6	21472.4	51.561	2.1169	1.08195	0.480694	Up
A0A7S5EW00		IGH c4126_heavy_IGHV4-59B_IGHD5-24_IGHJ6 (Fragment)		84428	147116	29832.2	70873.6	184988	107281	88748.6	158589	130988	175483	37944.9	463089	278606	301762	105166	206364	203297	125657	277075	195824	152365	0.0258184	213377	115257	34751.4	54.0158	117833	50052.6	15828	42.4776	0.552227	-0.856666	0.480694	Down
A0A7S5EWG2		IGH c1049_heavy_IGHV3-11_IGHD6-13_IGHJ5 (Fragment)		113027	594151	157556	383381	89751.3	185087	375908	298122	161361	247265	97976.5	184000	29250.4	89622.1	124748	143367	90192.3	99398.4	97894	103368	89935.5	0.00445836	104523	38281.8	11542.4	36.6253	260561	155759	49255.4	59.7785	2.49286	1.3178	0.373322	Up
A0A7S5EWY0		IGH c479_heavy_IGHV3-48_IGHD3-22_IGHJ3 (Fragment)		47127.4	41241.9	56233.3	119752	82796.3	64223.5	55196.2	121836	12693.1	92271.4	250.019	104045	250.019	250.019	250.019	250.019	250.019	250.019	28228.6	20876.3	27048.7	0.00165298	16540.8	31273.7	9429.39	189.071	69337.1	34791.2	11002	50.1769	4.19189	2.0676	0.31754	Up
A0A7S5EX17		IGH c1754_heavy_IGHV4-59B_IGHD3-10_IGHJ5 (Fragment)		231333	153367	250.019	250.019	250.019	250.019	65399	220862	26131.6	14093.4	4931.49	8648.69	8395.13	7331.93	250.019	250.019	250.019	250.019	250.019	250.019	250.019	0.0264445	2823.4	3689.24	1112.35	130.667	71218.6	94430.6	29861.6	132.593	25.2244	4.65675	0.480694	Up
A0A7S5EX52		IGH c1218_heavy_IGHV3-48_IGHD2-2_IGHJ6 (Fragment)		67210.8	675242	537417	872093	804566	1.27713e+06	951292	488027	433859	1197677	32781.7	106443	26255.3	826308	671341	513042	193188	722383	572605	472556	534108	0.045924	424637	286691	86440.7	67.5144	730451	367940	116353	50.3716	1.72018	0.782557	0.54058	Up
A0A7S5EXF6		IGH c3227_heavy_IGHV1-18_IGHD3-10_IGHJ4 (Fragment)		456931	557597	417457	601148	374334	667464	329427	728963	562901	620456	465193	146575	186510	478219	337598	691490	489733	722532	213727	37420.6	118540	0.0466875	353412	232941	70234.4	65.912	531668	131660	41634.6	24.7636	1.50438	0.589172	0.54058	Up
A0A7S5EXK5		IGH c1788_heavy_IGHV4-59B_IGHD6-19_IGHJ1 (Fragment)		452926	98944.1	68746	375678	29361.9	250.019	374888	154861	36581.8	149032	533779	801880	1.55917e+06	534130	473426	118277	507870	126412	341494	250.019	552348	0.031911	504458	421749	127162	83.6045	174127	165504	52336.9	95.0479	0.345176	-1.5346	0.489927	Down
A0A7S5EY66		IGH c2306_heavy_IGHV3-33_IGHD1-26_IGHJ3 (Fragment)		1.75967e+06	1.59608e+06	977665	4.01296e+06	1.2156e+06	1.69168e+06	886396	2.11527e+06	663965	2.30821e+06	656345	508140	735967	1.12067e+06	168243	937800	2065749	1.10317e+06	411187	267963	458685	0.0104069	766720	535111	161342	69.7923	1.72275e+06	965697	305380	56.0555	2.24691	1.16794	0.401721	Up
A0A7T0LN43		Immunglobulin heavy chain variable region (Fragment)		1.08141e+06	452353	178966	315640	219887	728611	173342	639200	701046	394582	281520	120422	367427	104570	323450	125290	74469.5	476311	424556	327259	88754.2	0.026303	246730	147655	44519.6	59.8448	488504	295218	93356.1	60.4331	1.97991	0.985438	0.480694	Up
A0A7T0LNV8		Immunglobulin lambda chain variable region (Fragment)		384352	250.019	250.019	250.019	250.019	250.019	250.019	250.019	250.019	250.019	250.019	739792	547852	192153	80127	271240	129423	345984	333895	250.019	309391	0.0104311	268214	227307	68535.6	84.7483	38660.3	121464	38410.2	314.183	0.144139	-2.79446	0.401721	Down
A0A7T0PXX9		Immunglobulin kappa chain variable region (Fragment)		1.94371e+06	1.03009e+06	1.12205e+06	670554	1.08584e+06	1.27392e+06	1.29945e+06	737420	1251530	658603	258313	388741	178014	500896	1.01619e+06	866647	1.04488e+06	978919	691832	1.0411e+06	1.02e+06	0.0254236	725957	337634	101800	46.5088	1.10732e+06	383056	121133	34.5932	1.52532	0.609113	0.480694	Up
A0A7U3M562		IGH c4210_heavy_IGHV3-43_IGHD3-10_IGHJ5 (Fragment)		115944	49310	34963.2	80660.3	68247.4	19306.1	5378.15	59868.9	58110	99443.6	410670	317919	336444	131579	10022.4	203904	88192.1	104722	57494.3	63770.4	52506.6	0.0316855	161566	135515	40859.2	83.8758	59123.1	34249	10830.5	57.9282	0.365939	-1.45033	0.489927	Down
P07477	PRSS1	Serine protease 1	5644	379592	630493	377226	599186	387257	783610	607064	481950	294743	250.019	250.019	250.019	250.019	359715	288551	399599	395729	250.019	250.019	454144	250.019	0.0063756	172658	201808	60847.5	116.883	454137	219144	69299.5	48.2551	2.63027	1.39521	0.373322	Up
Q92820	GGH	Gamma-glutamyl hydrolase	8836	153460	50732.6	250.019	89740.4	250.019	250.019	5509.82	129180	250.019	6543.94	3603.81	250.019	7913.02	250.019	250.019	250.019	250.019	250.019	250.019	250.019	18821.1	0.0357797	2939.83	5790.24	1745.82	196.959	43616.6	59548.1	18830.8	136.526	14.8365	3.89108	0.509417	Up
Q9Y5Y7	LYVE1	Lymphatic vessel endothelial hyaluronic acid receptor 1	10894	248846	150522	220898	119378	131878	156322	263853	116583	178811	185256	249716	291693	344172	337195	300655	341420	139583	277396	187924	330917	515775	0.00192223	301495	96924.6	29223.9	32.148	177235	52533.8	16612.7	29.6408	0.587853	-0.766473	0.31754	Down
P55103	INHBC	Inhibin beta C chain	3626	250.019	250.019	250.019	250.019	250.019	250.019	250.019	250.019	250.019	250.019	33906.5	37717.5	38313.7	34116.4	6156.79	250.019	250.019	250.019	250.019	250.019	250.019	0.0264145	13791.9	17748.3	5351.32	128.686	250.019	0	0	0	0.018128	-5.78564	0.480694	Down
P68371	TUBB4B	Tubulin beta-4B chain	10383	178647	108438	115808	41077.6	49283.5	237993	250.019	67685.6	149947	90954.4	250.019	250.019	250.019	250.019	46429.1	250.019	88650	250.019	107126	71435.6	69785	0.0129256	34993.3	42419.4	12789.9	121.222	104008	70712.7	22361.3	67.9875	2.97224	1.57155	0.413416	Up
O15382	BCAT2	Branched-chain-amino-acid aminotransferase, mitochondrial	587	70339.6	45376.5	76478.5	250.019	22919.8	46820	250.019	226139	250.019	250.019	250.019	183868	250.019	257611	94233	324169	226569	202178	876851	306224	250.019	0.0432348	224768	247640	74666.3	110.176	48907.4	68954.8	21805.4	140.991	0.21759	-2.20032	0.529338	Down
B4E1B2		Serotransferrin		20346148	1.84249e+06	16524180	12683946	1.21502e+06	5.12868e+06	17783198	5.74154e+06	15228550	3.63421e+06	2625714	681557	216885	13939515	1.66176e+06	4.76778e+06	492685	446411	456656	394080	587945	0.00712047	2.38827e+06	4.06962e+06	1.22704e+06	170.4	1.00128e+07	7.2329e+06	2.28724e+06	72.2366	4.19249	2.06781	0.373322	Up
Q9UHG3	PCYOX1	Prenylcysteine oxidase 1	51449	79260.6	98073.2	120872	65302.1	96921.6	111304	121661	70878.2	55956.1	68816.4	18562.7	2418.62	250.019	55495.1	114788	89589.7	89058.8	87019.2	250.019	80700.7	52804.3	0.0316679	53721.6	42061.3	12682	78.295	88904.5	24058.1	7607.83	27.0606	1.65491	0.726754	0.489927	Up
D3DQX7	SAA1	Serum amyloid A protein	6288	11935328	402452	2.7186e+06	2.22311e+06	595060	337902	328805	3.61038e+06	8527263	1.98796e+06	859168	219125	434090	250.019	333666	478844	250.019	702661	250.019	159300	235850	0.0218418	311223	287145	86577.4	92.2633	3.26669e+06	3.92304e+06	1.24057e+06	120.092	10.4963	3.39181	0.480694	Up
O14786	NRP1	Neuropilin-1	8829	97593	130887	582435	571974	955093	250.019	59653.3	250.019	250.019	725390	35871.8	60839.4	250.019	134402	124058	250.019	208333	191383	250.019	250.019	36515.6	0.0429739	72036.7	79198.6	23879.3	109.942	312378	358887	113490	114.889	4.33637	2.11649	0.529338	Up
G3V2B9	SERPINA1	Alpha-1-antitrypsin (Fragment)	5265	620408	394402	468569	524923	304946	720781	611710	368948	356171	448634	57546.3	14528.8	101980	565585	317946	404366	352321	270747	229376	169172	396350	0.00379895	261811	167385	50468.4	63.9335	481949	134895	42657.4	27.9894	1.84083	0.880358	0.373322	Up
P04264	KRT1	Keratin, type II cytoskeletal 1	3848	1.96247e+06	958364	249784	290377	905246	821890	195694	1.21345e+06	351722	445501	489185	430688	824940	365664	107364	69917.5	215680	68706.9	245402	358484	563702	0.0413903	339976	232757	70178.8	68.4628	739450	555430	175642	75.1138	2.17501	1.12102	0.529338	Up
P00915	CA1	Carbonic anhydrase 1	759	4968454	905472	1.45376e+06	1.60037e+06	606034	328901	2.21894e+06	937111	782422	1.35852e+06	794869	762692	780910	394444	440107	441471	319250	423026	1.0674e+06	813016	680841	0.0421205	628911	236947	71442.3	37.6758	1.516e+06	1.33052e+06	420748	87.7654	2.41051	1.26934	0.529338	Up
P02741	CRP	C-reactive protein	1401	18558494	1.36705e+06	7.37609e+06	4.22004e+06	3.91908e+06	1847413	250.019	1.66235e+06	4943835	4.57511e+06	2.70076e+06	250.019	250.019	250.019	1.18522e+06	5.22613e+06	250.019	250.019	250.019	250.019	250.019	0.0267889	828556	1.687e+06	508650	203.608	4.84697e+06	5.27551e+06	1.66826e+06	108.841	5.8499	2.54841	0.480694	Up
P02751	FN1	Fibronectin	2335	1.20828e+06	2.02647e+06	1.06878e+06	978025	436631	673545	442336	863660	440044	535768	250.019	483588	250.019	754265	580080	432588	571648	221838	757066	483889	678134	0.0256256	451236	270149	81452.8	59.8686	867354	495411	156663	57.1175	1.92217	0.942738	0.480694	Up
P08779	KRT16	Keratin, type I cytoskeletal 16	3868	2213923	973746	237633	554358	1243930	861366	484082	1741733	423293	556172	60900.4	250.019	308608	481882	232971	222613	475334	166218	649237	124527	907530	0.0101192	330006	274088	82640.5	83.0553	929024	634942	200786	68.345	2.81517	1.49322	0.401721	Up
P0DJI9	SAA2	Serum amyloid A-2 protein	6289	5.81317e+06	250.019	6.47883e+06	11445702	2883537	2.13628e+06	250.019	4.04975e+06	12999930	2.06927e+06	439948	250.019	250.019	250.019	250.019	250.019	250.019	250.019	250.019	250.019	250.019	0.00225131	40222.6	132574	39972.5	329.601	4.7877e+06	4.47351e+06	1.41465e+06	93.4377	119.03	6.89518	0.31754	Up
P30043	BLVRB	Flavin reductase (NADPH)	645	714676	136101	259282	371130	283759	72446.1	274033	153934	216910	438562	96238.9	105310	25686.7	57809	84505.7	120437	152095	173513	294524	282877	81853.2	0.0192707	134077	86579.2	26104.6	64.5741	292083	184109	58220.5	63.0332	2.17847	1.12332	0.469761	Up
P35908	KRT2	Keratin, type II cytoskeletal 2 epidermal	3849	244085	112632	25362	67546.2	280851	172835	135200	202700	51592.1	176753	44783.2	5540.96	91139.8	68493.6	36728.1	26764	77031.7	22299.9	18342.7	19106.4	161627	0.00406566	51987.1	45416	13693.4	87.3603	146956	84016.2	26568.3	57.1711	2.82677	1.49916	0.373322	Up
Q4F786	HBD	Hemoglobin delta Etolia variant (Fragment)	3045	1517309	1.55777e+06	1.99205e+06	1.7659e+06	3.58181e+06	250.019	2369439	2817251	1995905	1405355	250.019	60861.3	8518.47	783947	250.019	250.019	1.54228e+06	250.019	1481072	1.01404e+06	250.019	0.000511619	444724	635866	191721	142.98	1.9003e+06	945349	298946	49.7473	4.27299	2.09525	0.183607	Up
Q4TZM4	HBB	Hemoglobin beta chain (Fragment)	3043	24777858	15072136	29182114	40305644	19684308	9279006	39346032	21332312	15884624	23714928	179989	2.51327e+06	551604	12359409	2236547	7856872	12106421	8.08169e+06	13039750	348111	11898657	8.03942e-05	6.47021e+06	5.37824e+06	1.6216e+06	83.123	2.38579e+07	1.00925e+07	3.19153e+06	42.3026	3.68734	1.88258	0.115406	Up
Q56G89		Serum albumin		85233.6	139443	46231.6	39078.6	69379	124634	46771.3	54214.6	16010.8	56908.9	250.019	4192.19	1722.61	45808.2	22262.1	84410.8	44869.1	52133.6	35991	81744	21110.6	0.0454589	35863.1	29574	8916.9	82.4637	67790.6	38567.3	12196.1	56.8919	1.89026	0.918585	0.54058	Up
Q5TEC6	H3-7	Histone H3-7		33457554	76344120	67007908	98077120	99701488	162409168	40887896	134681024	50137408	44084800	250.019	250.019	250.019	50591532	32531586	66311744	54398016	41591876	66982624	75651944	49453032	0.0173395	3.97739e+07	2.82099e+07	8.50559e+06	70.9255	8.06788e+07	4.28841e+07	1.35611e+07	53.1541	2.02844	1.02037	0.442328	Up
Q5XTR9	HBD/HBB	Hemoglobin delta-beta fusion protein (Fragment)		2.07365e+06	76829.9	215761	525377	697811	507352	800308	460746	208313	367198	241000	216560	103138	324752	77196.8	250.019	169668	325706	384551	510544	250.019	0.0462472	213965	163357	49254	76.3475	593334	566018	178990	95.3961	2.77304	1.47147	0.54058	Up
Q6MZU6	DKFZp686C15213	Uncharacterized protein DKFZp686C15213		9591423	29766452	4.90219e+06	7868862	23645802	8391100	9887092	16149642	19008530	22985824	1.687e+06	775444	1.90173e+06	11817469	7687672	5557874	6.48179e+06	3.26194e+06	10165197	7.82223e+06	4571966	0.00244336	5.61185e+06	3.58275e+06	1.08024e+06	63.8426	1.52197e+07	8.3358e+06	2.63601e+06	54.7698	2.71206	1.43939	0.31754	Up
Q6N092	DKFZp686K18196	Uncharacterized protein DKFZp686K18196 (Fragment)		68685144	149237680	86733176	82466736	86295624	123372184	69060416	130010256	94062616	116800144	46811028	72539624	97318136	52463816	46647084	81788104	108620416	65158860	46753808	64566352	52552584	0.00506924	6.68382e+07	2.1358e+07	6.43966e+06	31.9547	1.00672e+08	2.74738e+07	8.68799e+06	27.2903	1.50621	0.590924	0.373322	Up
Q6VFQ6	HBB	Hemoglobin beta chain (Fragment)	3043	1.74723e+06	385855	424886	427777	235161	250.019	679763	346435	137435	212689	250.019	250.019	250.019	250.019	81433.2	215546	112419	141434	250.019	521333	125747	0.0357133	109015	155759	46963	142.878	459748	489110	154670	106.387	4.2173	2.07632	0.509417	Up
Q86YZ3	HRNR	Hornerin	388697	239379	18328.8	37699.7	4274.29	217613	134679	250.019	173539	30297.5	65397.5	9128.23	16340.4	17491.1	56853.3	250.019	250.019	69765.8	250.019	250.019	250.019	122786	0.0433279	26692.3	39994.1	12058.7	149.834	92145.8	91271.1	28862.5	99.0508	3.45215	1.7875	0.529338	Up
Q8N1N4	KRT78	Keratin, type II cytoskeletal 78	196374	77670.5	263877	250.019	250.019	586457	322859	250.019	289180	387363	353250	14876.2	250.019	10322.7	183898	250.019	250.019	250.019	250.019	250.019	250.019	158520	0.00679438	33578.8	68463.4	20642.5	203.889	228141	200503	63404.6	87.8857	6.79419	2.7643	0.373322	Up
Q9BWP8	COLEC11	Collectin-11	78989	250.019	8398.29	8316.91	4449.47	9584.44	8178.39	9042.99	7902.01	250.019	23068.2	84141.2	84815.6	88594	16640.8	11549.6	13414.4	9166.92	18953.5	13278.9	10634.7	23046.5	0.0260014	34021.5	33532.6	10110.5	98.563	7944.08	6356.53	2010.11	80.016	0.233502	-2.09849	0.480694	Down
V9H1D9		Alpha globin		5443393	635738	1.91012e+06	1.52181e+06	1.03157e+06	647312	1.58096e+06	1.16845e+06	1.08459e+06	946884	1.11397e+06	650140	261272	741453	767465	244435	435994	669695	1.03388e+06	928273	333979	0.042845	652777	303939	91641	46.5609	1.59708e+06	1.4108e+06	446134	88.3361	2.4466	1.29078	0.529338	Up

## Sheet: C.vs.DR
Accession	Gene Symbol	Protein name	ENTREZID	C1	C2	C4	C5	C6	C7	C8	C9	C10	C11	DR-1	DR-2	DR-3	DR-4	DR-5	DR-6	DR-7	DR-8	DR-9	DR-10	ttestPvalue	ControlMean	ControlSD	ControlSE	ControlCV	TestMean	TestSD	TestSE	TestCV	FC	Log2FC	fdr	threshold
A0A024R462	FN1	Fibronectin	2335	2.19575e+06	4.90529e+06	2.90483e+06	2403183	795308	2453100	1.25708e+06	1.28979e+06	1.40726e+06	1.48894e+06	7749842	4.94694e+06	18223582	4.05351e+06	14577515	15519857	14764449	9689196	2.0958e+06	1.03991e+06	0.00209894	9.26606e+06	6.19298e+06	1.95839e+06	66.8351	2.11005e+06	1.18625e+06	375124	56.2188	0.227719	-2.13468	0.0313768	Down
P12814	ACTN1	Alpha-actinin-1	87	1.18843e+06	250.019	204622	961211	585835	250.019	250.019	454890	608303	532048	554461	250.019	152108	52937.6	250.019	250.019	250.019	250.019	273187	406648	0.0466403	144059	201613	63755.6	139.951	453609	411474	130119	90.711	3.14877	1.65479	0.183592	Up
Q92954	PRG4	Proteoglycan 4	10216	412992	847487	958229	534582	975356	614675	756391	979461	683887	899126	326106	294072	308505	135922	270035	205982	256229	236137	439655	554767	6.07612e-06	302741	119153	37679.5	39.358	766219	199614	63123.6	26.0519	2.53094	1.33967	0.001161	Up
P02745	C1QA	Complement C1q subcomponent subunit A	712	7.23139e+06	6.24247e+06	7681564	7261865	9086072	7541848	7.96736e+06	6847989	9974554	7177796	4.49031e+06	4.02784e+06	3.81057e+06	3.54126e+06	5.84335e+06	3.58721e+06	4.76861e+06	4.87591e+06	7373679	6.77203e+06	7.42689e-05	4.90908e+06	1.34228e+06	424466	27.3428	7.70129e+06	1.0917e+06	345224	14.1755	1.56879	0.649648	0.00528225	Up
Q9NP78	ABCB9	ABC-type oligopeptide transporter ABCB9	23457	167344	250.019	103103	135813	250.019	345674	157272	146957	29098.8	109478	872657	742866	1155960	1.08701e+06	250347	1.09398e+06	302189	181510	214177	108268	0.00287247	600897	429700	135883	71.5098	119524	101584	32123.6	84.9903	0.198909	-2.32982	0.0365541	Down
O43790	KRT86	Keratin, type II cuticular Hb6	3892	250.019	2.88718e+06	250.019	2.34821e+06	3.75899e+06	4.58888e+06	3598133	2.78728e+06	2.55335e+06	3.87294e+06	589501	250.019	108930	28863	1.07631e+06	168227	616797	112865	2123021	2.68429e+06	0.00404831	750905	943644	298407	125.668	2.63955e+06	1.54921e+06	489903	58.6922	3.51515	1.81359	0.0442697	Up
P22352	GPX3	Glutathione peroxidase 3	2878	659438	326938	360095	389756	474627	439139	335905	224628	374215	226514	458264	744803	633736	1.48503e+06	706991	661317	784690	457474	359125	260582	0.0278687	655201	339585	107386	51.8291	381126	126275	39931.6	33.1321	0.581692	-0.781672	0.137009	Down
A0A0F7TAT3	IGHV4-39	IGHV4-39 protein (Fragment)	28394	127327	250.019	223530	20686	250.019	250.019	250.019	266581	250.019	195255	250.019	250.019	250.019	250.019	250.019	5333.38	250.019	250.019	250.019	250.019	0.0269749	758.355	1607.5	508.336	211.972	83463	108595	34340.7	130.111	110.058	6.78212	0.134926	Up
Q08380	LGALS3BP	Galectin-3-binding protein	3959	326371	357526	501889	400341	289750	606087	246745	467610	454711	393822	666440	887903	996001	779541	453623	644689	627894	843263	297385	313092	0.00781554	650983	237494	75102.2	36.4824	404485	107042	33849.7	26.4638	0.621345	-0.686534	0.0678243	Down
A0A109PPC2		GCT-A7 light chain variable region (Fragment)		3244.94	357987	1243941	270497	1.58419e+06	865106	528783	601350	486859	633458	208921	127158	9033.1	59425.5	592826	11391.4	15627.8	484170	115678	410359	0.0120358	203459	215378	68108.4	105.858	657542	466990	147675	71.0206	3.23181	1.69234	0.0896757	Up
A0A109PS54		GCT-A8 light chain variable region (Fragment)		250.019	2241.44	250.019	250.019	250.019	250.019	250.019	250.019	250.019	250.019	81536.5	68685.4	31635.1	51533.3	22008	59805.5	201947	23147.3	250.019	250.019	0.00991679	54079.8	58836.5	18605.7	108.796	449.161	629.742	199.142	140.204	0.00830552	-6.91171	0.0805669	Down
P22105	TNXB	Tenascin-X	7148	19323.5	45428.1	56972.8	22759.2	250.019	250.019	26211.2	14969.5	250.019	96990.8	115353	141822	111537	45090.7	67443	35757.2	110138	72575.6	250.019	145659	0.00597691	84562.5	48104.7	15212	56.8865	28340.5	30709.5	9711.2	108.359	0.335143	-1.57715	0.0570645	Down
Q16610	ECM1	Extracellular matrix protein 1	1893	642341	501864	455385	389535	397535	673394	394625	271424	138258	201145	1.01145e+06	832517	1.28058e+06	754412	1.60451e+06	1.11474e+06	1.92127e+06	1.41714e+06	287233	383321	0.0013621	1.06072e+06	518549	163980	48.8865	406551	173595	54895.5	42.6994	0.383278	-1.38354	0.0232567	Down
P02679	FGG	Fibrinogen gamma chain	2266	38379452	40621072	27798706	29412852	27999436	40944440	32559112	29174384	33608784	28848316	57752120	73475888	101820704	63259896	59999900	77159568	59108488	60945908	34191984	29372940	0.000449036	6.17087e+07	2.05947e+07	6.51261e+06	33.374	3.29347e+07	5.24356e+06	1.65816e+06	15.9211	0.533711	-0.905868	0.0136559	Down
P12955	PEPD	Xaa-Pro dipeptidase	5184	8617.08	24827.3	3256.22	250.019	19503.9	3762	11959.9	250.019	2989.93	250.019	17745	15034	17433.6	33508.4	22568.6	17652.3	34054.7	16092	250.019	6453.27	0.024699	18079.2	10437.2	3300.52	57.7302	7566.64	8663.03	2739.49	114.49	0.418527	-1.25661	0.127736	Down
P25311	AZGP1	Zinc-alpha-2-glycoprotein	563	1.61052e+06	1.06822e+06	1.22946e+06	1.44929e+06	1143234	1432980	1410939	870873	833861	1.26217e+06	2812405	3.19768e+06	3.46455e+06	3713572	2.29932e+06	3.34187e+06	3.19699e+06	2528949	1.49231e+06	1.40563e+06	2.2377e-05	2.74533e+06	805147	254610	29.3279	1.23115e+06	255483	80790.8	20.7515	0.448454	-1.15697	0.00238357	Down
O00391	QSOX1	Sulfhydryl oxidase 1	5768	361958	282182	250.019	371702	356848	214520	237832	356607	200179	221210	109136	153756	105923	109212	119315	85002.9	122364	79215.7	259456	245233	0.00868234	138861	63280.7	20011.1	45.5711	260329	114110	36084.7	43.8329	1.87474	0.906689	0.0736119	Up
P02788	LTF	Lactotransferrin	4057	785842	250.019	44632	55017.5	77851.4	75011	208391	159061	316342	241166	1.36614e+06	1407418	250.019	749907	387938	250.019	445341	477063	547831	437017	0.0347888	581915	481985	152417	82.8273	196357	229893	72698.5	117.079	0.337431	-1.56733	0.155268	Down
A0A1C9J6R5		B cell receptor heavy chain variable region (Fragment)		565421	1.20359e+06	1.85509e+06	2.21004e+06	1.09804e+06	1.88648e+06	245399	1.19405e+06	174455	223934	197270	315387	439618	603954	335735	342147	370677	101874	264752	46631	0.00558237	301805	161720	51140.3	53.5843	1.06565e+06	750476	237321	70.4243	3.53093	1.82005	0.0542468	Up
A0A1L2BU33		Anti-staphylococcal enterotoxin D heavy chain variable region (Fragment)		1.13338e+06	906153	625300	779374	862381	1.33995e+06	1087459	614004	525270	932232	573171	250.019	250.019	715469	929652	467892	250.019	807716	946250	821155	0.027737	526206	391119	123683	74.3281	880549	256925	81246.8	29.1778	1.67339	0.742778	0.136595	Up
A0A1L7B5J3	SERPINA1	Alpha-1-antitrypsin short transcript variant 1C4	5265	58996.7	250.019	250.019	82517.7	250.019	250.019	250.019	250.019	250.019	250.019	335900	24173.2	260604	222200	345948	172037	406881	228924	250.019	250.019	0.00114127	199717	148723	47030.5	74.4672	14351.5	30241	9563.03	210.717	0.0718591	-3.79869	0.0209063	Down
P05019	IGF1	Insulin-like growth factor I	3479	144172	132960	151346	21173.7	241117	12007.6	76597.1	114419	81839.3	141442	250.019	2.09489e+06	1.59005e+06	1.59611e+06	250.019	1.94346e+06	250.019	250.019	134221	385548	0.0333738	774528	907325	286921	117.146	111707	67475.4	21337.6	60.4038	0.144226	-2.79359	0.151872	Down
P05093	CYP17A1	Steroid 17-alpha-hydroxylase/17,20 lyase	1586	177663	374069	250.019	648297	218599	459406	250.019	523180	250.019	172061	250.019	250.019	250.019	250.019	250.019	250.019	250.019	250.019	250.019	367809	0.0155949	37006	116233	36755.9	314.091	257402	233662	73890.4	90.777	6.9557	2.7982	0.104433	Up
P08637	FCGR3A	Low affinity immunoglobulin gamma Fc region receptor III-A	2214	250.019	12914.1	250.019	7808.22	250.019	250.019	250.019	250.019	45594.9	66226.9	270002	250.019	57779.2	250.019	52459.6	60580.2	32221.2	82422.3	116022	38286.6	0.0383938	71027.4	78153.4	24714.3	110.033	13404.4	23324.3	7375.8	174.005	0.188722	-2.40567	0.164295	Down
A0A1W6IYJ4		N90-VRC38.03 light chain variable region (Fragment)		46857.4	36915.5	250.019	118899	14410.5	34111.7	250.019	82660.4	250.019	250.019	250.019	250.019	250.019	250.019	250.019	250.019	250.019	250.019	39545.2	250.019	0.0417102	4179.54	12426.2	3929.52	297.311	33485.5	40396.5	12774.5	120.639	8.01176	3.00212	0.172602	Up
P16070	CD44	CD44 antigen	960	31271.8	65774.6	261297	113340	90528	96679	112656	250.019	173119	249894	871020	493566	462008	449430	850090	522286	1.13222e+06	1.83773e+06	60140.6	111178	0.00374821	678967	524760	165944	77.288	119481	85842.3	27145.7	71.846	0.175974	-2.50656	0.0426081	Down
A0A2U8J8Y2	IgH	Ig heavy chain variable region (Fragment)		5569	7535.46	250.019	250.019	250.019	250.019	250.019	17526	21114	18786.9	276805	47812.4	157881	997514	213348	936953	250.019	442458	250.019	4725.7	0.0209846	307800	375744	118821	122.074	7178.14	8684.34	2746.23	120.983	0.0233208	-5.42224	0.120072	Down
A0A2U8J927	IgH	Ig heavy chain variable region (Fragment)		184897	75725.1	389373	265507	250.019	308306	250.019	234529	181562	215248	250.019	13125.6	25832.4	123901	250.019	250.019	250.019	250.019	220908	190976	0.0174935	57599.3	87105.8	27545.3	151.227	185565	127818	40419.6	68.8805	3.22165	1.6878	0.110056	Up
P17661	DES	Desmin	1674	250.019	218213	311518	471150	314073	310977	22780	99042.1	65880.6	250.019	250.019	250.019	250.019	250.019	250.019	250.019	250.019	250.019	175108	183017	0.0212335	36012.6	75417.1	23849	209.419	181413	165849	52445.9	91.4203	5.0375	2.33271	0.120351	Up
P36980	CFHR2	Complement factor H-related protein 2	3080	210127	840953	814648	856092	559677	687183	841018	616084	578348	760343	852790	1.51189e+06	1.59949e+06	1.44928e+06	762545	1.37938e+06	707547	708541	678042	690817	0.0198174	1.03403e+06	394884	124873	38.1888	676447	199173	62984	29.444	0.654184	-0.612232	0.117693	Down
A0A5C2FT02		IGL c1276_light_IGLV2-11_IGLJ3 (Fragment)		2283266	31604.2	250.019	2002688	250.019	2.95368e+06	1.61435e+06	2774243	1.74072e+06	2.50736e+06	3.81195e+06	4814099	1.61892e+06	2.93769e+06	2.29327e+06	1.45203e+06	3.01643e+06	7787157	4427208	1.37186e+06	0.0258473	3.35306e+06	1.97528e+06	624638	58.9097	1.59084e+06	1.16719e+06	369099	73.3695	0.474444	-1.07569	0.130919	Down
A0A5C2FT60		IGL c128_light_IGKV1-9_IGKJ4 (Fragment)		250.019	1.67294e+06	250.019	250.019	573741	737389	250.019	250.019	250.019	250.019	1.46398e+06	207769	1.05831e+06	613634	727019	1.40842e+06	999345	1.17253e+06	250.019	386546	0.0467279	803781	500831	158377	62.3094	298582	555791	175757	186.144	0.371472	-1.42868	0.183592	Down
A0A5C2FTA7		IGL c211_light_IGLV7-46_IGLJ3 (Fragment)		250.019	261645	148579	250.019	311642	110692	326477	209738	250.019	250.019	321213	250.019	133889	48893.7	888998	726937	910064	1.0382e+06	252671	105603	0.0354494	442671	403283	127529	91.102	136977	134519	42538.5	98.205	0.309434	-1.6923	0.157099	Down
A0A5C2FTP6		IGL c348_light_IGKV1-39_IGKJ2 (Fragment)		68358.9	87880.7	105429	78302.3	409334	17207.6	47365.5	59202.9	183558	206619	250.019	47228.5	250.019	10629.9	31075.9	250.019	4853.26	14377.2	96515.3	113912	0.025728	31934.2	41677.2	13179.5	130.51	126326	115491	36521.5	91.4233	3.95581	1.98397	0.130731	Up
A0A5C2FTR4		IGL c1349_light_IGKV3-20_IGKJ5 (Fragment)		250.019	13186.5	250.019	250.019	250.019	250.019	250.019	250.019	250.019	250.019	250.019	888832	484289	250.019	250.019	1.23976e+06	89453.2	337745	250.019	250.019	0.0441102	304133	442050	139788	145.348	1543.67	4090.88	1293.65	265.01	0.00507563	-7.6222	0.178413	Down
A0A5C2FU63		IGL c282_light_IGLV1-47_IGLJ2 (Fragment)		173485	60922.3	250.019	250.019	566928	230097	250.019	250.019	250.019	250.019	1194368	656899	250.019	809602	1.35975e+06	250.019	996893	806646	250.019	175950	0.0106749	600086	520343	164547	86.7114	103293	183020	57875.9	177.185	0.172131	-2.53842	0.0843436	Down
A0A5C2FU71		IGL c114_light_IGLV3-19_IGLJ2 (Fragment)		250.019	250.019	9296.02	250.019	33350.7	250.019	51000.2	343406	250.019	149090	86048.8	6.37843e+06	4568031	5.25507e+06	5.75507e+06	250.019	148265	198399	18451192	55816	0.0391883	4.08966e+06	5.73055e+06	1.81216e+06	140.123	58739.3	110279	34873.2	187.743	0.0143629	-6.12151	0.166243	Down
A0A5C2FUA0		IGL c568_light_IGKV3-20_IGKJ4 (Fragment)		10649453	5.1172e+06	13738983	7919189	4038092	2.71637e+06	8851715	11576256	8961863	10677844	4.48944e+06	12370778	211410	906121	2.28584e+06	97856.6	599273	2.17831e+06	1.46565e+06	1.345e+06	0.00193442	2.59497e+06	3.66688e+06	1.15957e+06	141.307	8.4247e+06	3.52284e+06	1.11402e+06	41.8156	3.24655	1.69891	0.0297507	Up
A0A5C2FUC4		IGL c352_light_IGLV1-40_IGLJ3 (Fragment)		282221	367539	250.019	1.82819e+06	1141261	1.30604e+06	1.70257e+06	2356479	2.76315e+06	2630532	396210	488341	974532	427578	537468	224191	378661	228436	460846	493551	0.00704242	460981	209133	66133.6	45.3669	1.43782e+06	994334	314436	69.1556	3.11905	1.6411	0.0640949	Up
A0A5C2FUE7		IGL c618_light_IGKV3-20_IGKJ1 (Fragment)		5230731	4.26714e+06	4.12764e+06	6.93535e+06	3300618	3.00367e+06	3.56944e+06	2.33502e+06	2734897	4.60344e+06	2111552	1.14674e+06	1.04546e+06	1.68487e+06	2.55295e+06	2.38446e+06	1.94954e+06	2340202	3.79715e+06	5283402	0.0149851	2.42963e+06	1.26875e+06	401213	52.2197	4.01079e+06	1.35898e+06	429747	33.8831	1.65078	0.72315	0.102773	Up
A0A5C2FUI2		IGL c244_light_IGLV1-44_IGLJ3 (Fragment)		1.9047e+06	1.74147e+06	2.09803e+06	1.60946e+06	2.37975e+06	4058311	1.03917e+06	3.07947e+06	3.10204e+06	2.68966e+06	1.33381e+06	658320	794359	921242	1368413	2.01693e+06	1.25798e+06	1.41963e+06	2.62761e+06	2.42666e+06	0.0209197	1.4825e+06	670460	212018	45.2251	2370206	883614	279423	37.28	1.59879	0.676984	0.120072	Up
A0A5C2FUJ1		IGL c668_light_IGKV3-20_IGKJ1 (Fragment)		2.18253e+06	2.05476e+06	2498376	2.04248e+06	2.42357e+06	1.86764e+06	2.13535e+06	2.20849e+06	2.1568e+06	2.11887e+06	935262	805134	935018	595161	889313	681449	353150	479883	2.01909e+06	2806410	0.000283016	1.04999e+06	766639	242433	73.0142	2.16889e+06	182182	57610.9	8.39977	2.06563	1.04658	0.0103545	Up
A0A5C2FUJ7		IGL c432_light_IGKV1D-39_IGKJ1 (Fragment)		250.019	27361.1	12705.2	33219	24066.1	54118.2	38790.4	250.019	65746.8	22557	250.019	250.019	250.019	3046.06	250.019	250.019	250.019	250.019	250.019	62863.6	0.0334738	6790.98	19721.5	6236.49	290.407	27906.4	21265.8	6724.85	76.2042	4.10933	2.0389	0.152055	Up
A0A5C2FUL7		IGL c284_light_IGKV3-20_IGKJ3 (Fragment)		2544715	961067	678611	520544	780127	601348	208151	1198364	1.93017e+06	1.25188e+06	245135	951753	250.019	47086.5	77742.7	276231	26338.4	250.019	672782	1.46971e+06	0.0210646	376728	499402	157925	132.563	1.0675e+06	705343	223049	66.0744	2.83361	1.50264	0.120202	Up
A0A5C2FUP9		IGL c599_light_IGKV2D-28_IGKJ4 (Fragment)		250.019	63107.4	63059.5	153986	12250.6	24705.9	54248.2	25337.4	47386.6	59319.4	33157.8	4717.24	1691.71	250.019	4659.45	976.873	250.019	250.019	250.019	250.019	0.00404079	4645.32	10174.8	3217.56	219.034	50365.2	42705.8	13504.8	84.7923	10.8421	3.43858	0.0442697	Up
A0A5C2FUU7		IGL c781_light_IGLV1-47_IGLJ1 (Fragment)		7617239	10277521	5263601	6.58184e+06	6715462	4860633	6898814	5106396	9610491	11451678	161053	1.51436e+06	431882	482869	5.68758e+06	560672	3.72251e+06	3205187	12387226	9487960	0.0266776	3.76413e+06	4.2336e+06	1.33878e+06	112.472	7.43837e+06	2.29195e+06	724778	30.8126	1.97612	0.982669	0.134369	Up
A0A5C2FV47		IGL c484_light_IGLV6-57_IGLJ3 (Fragment)		250.019	250.019	250.019	250.019	250.019	250.019	250.019	1.09343e+06	250.019	250.019	1.16209e+06	588487	567080	386278	250.019	938366	545146	184794	357191	250.019	0.037098	472994	375617	118780	79.4126	109568	345695	109318	315.506	0.231649	-2.10999	0.161843	Down
A0A5C2FVE3		IGL c574_light_IGKV3-15_IGKJ5 (Fragment)		925900	1.61974e+06	1.07756e+06	493779	516950	2.53167e+06	1440101	1.38846e+06	1.37272e+06	690708	473674	997645	371551	304479	353195	222655	428805	934200	535304	732168	0.00529889	535368	266204	84181.1	49.7236	1.20576e+06	613460	193993	50.8775	2.25221	1.17134	0.0530996	Up
A0A5C2FVE4		IGL c40_light_IGKV3-20_IGKJ2 (Fragment)		3.0827e+06	1.77712e+06	2197761	1.89651e+06	1.79733e+06	1.69525e+06	1.56413e+06	1311454	1.77453e+06	1.03754e+06	22674.7	22625.2	232326	702054	51569.8	16788.8	33009.9	376057	731235	208007	2.04509e-07	239635	278299	88005.9	116.135	1.81343e+06	547604	173168	30.1971	7.56749	2.91981	0.000294084	Up
A0A5C2FVF5		IGL c50_light_IGKV1-5_IGKJ4 (Fragment)		1.00976e+06	1.78894e+06	698433	1.65185e+06	2.09183e+06	1.45962e+06	1.63579e+06	1732527	2.14698e+06	3169734	576027	1.06014e+06	2201365	363783	572327	509056	1.06661e+06	902802	709496	1.62172e+06	0.0117662	958333	569874	180210	59.4651	1.73855e+06	670930	212167	38.5914	1.81414	0.859283	0.0889232	Up
A0A5C2FVG1		IGL c889_light_IGKV2D-28_IGKJ2 (Fragment)		713298	61842.3	285477	1.3744e+06	1.59243e+06	151634	722043	468613	330667	620612	52700.1	73169.7	173880	119130	67499	78548.2	382646	374045	370195	390426	0.0201114	208224	151113	47786	72.5722	632102	503526	159229	79.6589	3.03569	1.60202	0.118525	Up
A0A5C2FVI5		IGL c1068_light_IGKV3-20_IGKJ1 (Fragment)		18884.6	53258	8954.78	27879.9	20051.9	46059.1	49058.6	250.019	54595.8	32457.1	250.019	2299.31	250.019	250.019	780.529	250.019	250.019	250.019	250.019	250.019	8.41911e-05	507.999	651.109	205.899	128.171	31145	19191.8	6068.97	61.6207	61.3092	5.93803	0.00563101	Up
A0A5C2FVJ4		IGL c812_light_IGKV1D-39_IGKJ4 (Fragment)		135801	115105	120245	191932	277772	250.019	108341	51723.9	149441	102647	49441.5	250.019	250.019	87114.7	9679.16	13751.8	55430.2	33480.1	250.019	248843	0.0377521	49849.1	75706.6	23940.5	151.872	125326	74804.7	23655.3	59.6882	2.51411	1.33005	0.162781	Up
A0A5C2FVL4		IGL c1098_light_IGLV1-40_IGLJ3 (Fragment)		250.019	250.019	250.019	33984.4	250.019	250.019	250.019	408939	250.019	250.019	566312	250.019	276870	383920	188782	1.39166e+06	534998	478933	250.019	64093.8	0.0212999	388607	411862	130242	105.984	44492.4	128492	40632.7	288.795	0.114492	-3.12668	0.120351	Down
A0A5C2FVP1		IGL c872_light_IGKV1D-17_IGKJ1 (Fragment)		1.53809e+06	1.24168e+06	1.87429e+06	2.41722e+06	1420051	1.59966e+06	1.56014e+06	1.82942e+06	1.26584e+06	2.09466e+06	1.16763e+06	59477.4	417775	463919	778397	1.01198e+06	687590	60241.7	898277	814094	6.86263e-06	635938	378380	119654	59.4996	1.68411e+06	372311	117735	22.1073	2.64822	1.40502	0.001161	Up
A0A5C2FVQ8		IGL c714_light_IGKV3-20_IGKJ4 (Fragment)		1.51718e+06	3.73162e+06	1.36413e+06	3.69836e+06	6028868	3.4223e+06	4618181	2.99092e+06	4298447	3883531	4.48257e+06	509352	1.21067e+06	1.33035e+06	2.33189e+06	121479	605654	1.56394e+06	3.18779e+06	4868428	0.0377463	2.02121e+06	1.66213e+06	525613	82.2346	3.55535e+06	1.38449e+06	437813	38.9409	1.75902	0.814773	0.162781	Up
A0A5C2FVR9		IGL c1101_light_IGKV1D-17_IGKJ1 (Fragment)		578695	1.38583e+06	715290	1.69917e+06	456880	614641	756624	708267	506651	579187	145440	37850.2	7338.54	149840	60808.1	191785	86143.3	22059.2	287753	326325	9.45896e-05	131534	110431	34921.3	83.9561	800123	408935	129316	51.1089	6.08301	2.60478	0.00618272	Up
A0A5C2FVS4		IGL c734_light_IGKV1-5_IGKJ1 (Fragment)		115054	349864	379848	5796.24	35305.3	54634.1	50253	56272.7	79489.4	85371.9	1848.17	250.019	250.019	250.019	250.019	1641.26	250.019	250.019	21205.1	63413.4	0.0159734	8960.81	20205.7	6389.61	225.49	121189	131919	41716.4	108.854	13.5243	3.75748	0.105366	Up
A0A5C2FVT3		IGL c744_light_IGKV1-12_IGKJ2 (Fragment)		3.73172e+06	936138	989885	6313094	2.91705e+06	2300601	2.34624e+06	3502076	1.25604e+06	2870618	897688	624380	347829	250.019	147946	250.019	157401	64796.6	1.28027e+06	220582	0.000307114	374139	428886	135626	114.633	2.71635e+06	1.60697e+06	508168	59.1592	7.26025	2.86002	0.0107715	Up
A0A5C2FVT6		IGL c1039_light_IGKV1-6_IGKJ2 (Fragment)		2.75518e+06	767469	1.48991e+06	1.50717e+06	2.25833e+06	1826404	1479008	1.17801e+06	1.08373e+06	1.99311e+06	15831.2	447288	718338	1.01237e+06	11662.4	203805	1.09343e+06	155897	1.38874e+06	1.16885e+06	0.000719831	621621	519985	164434	83.6498	1.63383e+06	590225	186645	36.1251	2.62834	1.39415	0.016471	Up
A0A5C2FVW4		IGL c952_light_IGKV3-15_IGKJ2 (Fragment)		135678	358606	116938	345214	165467	215464	289207	289066	193260	11097.2	2350.45	1743.69	38823.6	6705.36	3916.67	8059.54	9077.83	5859.02	186811	213672	0.00131817	47701.9	81347.7	25724.4	170.534	212000	109996	34783.7	51.8849	4.44426	2.15194	0.0228376	Up
A0A5C2FVY3		IGL c1171_light_IGKV3-11_IGKJ4 (Fragment)		1.21001e+06	1.5414e+06	811955	1.15551e+06	631562	1.46573e+06	1.3629e+06	1.18734e+06	567693	906745	377178	20573.3	250.019	64238.1	65813.4	65142.3	330432	199273	682134	71775.9	1.46877e-06	187681	216667	68516	115.444	1.08408e+06	340113	107553	31.3733	5.77621	2.53012	0.0007244	Up
A0A5C2FW01		IGL c1191_light_IGKV1-5_IGKJ5 (Fragment)		11827763	7417848	7797867	8068414	7.4266e+06	7.98793e+06	8297750	6.35043e+06	7205536	7379028	3.07744e+06	5322985	1.54964e+06	4421482	2.38927e+06	6079228	2556365	3.3907e+06	8363536	7343531	0.000625442	4.44942e+06	2.26951e+06	717683	51.007	7.97592e+06	1.46005e+06	461710	18.3058	1.79258	0.842034	0.0153741	Up
A0A5C2FW50		IGL c416_light_IGKV1D-39_IGKJ2 (Fragment)		235061	225399	350098	530811	295827	566499	90487.1	284419	339644	348328	155040	54575.5	122047	73772.3	203332	266647	307124	142507	187303	329421	0.0156271	184177	93583.6	29593.7	50.8118	326657	140453	44415.3	42.9972	1.77361	0.826687	0.104433	Up
A0A5C2FW89		IGL c1082_light_IGKV3-20_IGKJ3 (Fragment)		10502938	2.27501e+06	3.07227e+06	803414	8531510	4.49646e+06	5203739	5.00041e+06	4.1418e+06	7646067	969271	226926	905379	479327	250.019	239578	115751	772956	4.21281e+06	3.89913e+06	0.00142418	1.18214e+06	1.55225e+06	490863	131.308	5.16736e+06	2.9676e+06	938439	57.4298	4.3712	2.12803	0.0240938	Up
A0A5C2FWC5		IGL c410_light_IGKV1-5_IGKJ1 (Fragment)		724987	386045	250.019	667445	854201	990855	1032920	380404	828225	866677	250.019	36294.1	31384	21211.3	250.019	15482.7	250.019	250.019	16286.6	1.08156e+06	0.00153014	120322	338010	106888	280.921	673201	324601	102648	48.2176	5.595	2.48414	0.0252914	Up
A0A5C2FWF0		IGL c1361_light_IGKV3-11_IGKJ5 (Fragment)		759450	752824	43628.6	655493	250.019	349354	1.1889e+06	6049.25	1.89243e+06	486362	14627.7	250.019	250.019	250.019	66909.2	152339	12461.8	78524.8	608776	489537	0.0301817	142393	221540	70056.9	155.584	613474	593013	187527	96.6647	4.30833	2.10713	0.143713	Up
A0A5C2FWG7		IGL c994_light_IGKV3-20_IGKJ4 (Fragment)		25836.2	802.049	29778.3	25346.3	250.019	250.019	14059	250.019	21359.1	1542.44	250.019	250.019	250.019	250.019	250.019	250.019	250.019	1589.46	250.019	6649.56	0.0143687	1023.92	2020.98	639.089	197.377	11947.3	12589.1	3981.04	105.372	11.6683	3.54452	0.100302	Up
A0A5C2FWM5		IGL c1498_light_IGKV1D-39_IGKJ1 (Fragment)		10586681	7.79786e+06	133087	28537714	19859858	26864794	32044158	20875046	22604244	30620236	429415	1.59648e+06	3.44121e+06	8.21527e+06	476182	8812290	3.64394e+06	1258501	7000562	7639712	0.000299904	4.25136e+06	3.35731e+06	1.06167e+06	78.9703	1.99924e+07	1.06335e+07	3.36259e+06	53.1876	4.70259	2.23345	0.0107113	Up
A0A5C2FWQ1		IGL c1379_light_IGKV1-39_IGKJ4 (Fragment)		51184.5	19800.1	250.019	37577.7	250.019	250.019	78966.5	124659	75728.9	99376.4	769.345	250.019	559.914	250.019	3087.26	568.993	250.019	1104.82	78442.2	4439.16	0.0236534	8972.17	24449.6	7731.65	272.505	48804.3	44710.9	14138.8	91.6127	5.43952	2.44348	0.125755	Up
A0A5C2FWQ8		IGL c1389_light_IGLV3-21_IGLJ3 (Fragment)		1.51451e+06	1132.55	542081	345714	214173	748721	296118	532648	368185	250.019	1.91807e+06	361116	720003	659070	1.30246e+06	394251	1256897	2.35375e+06	605304	1.10202e+06	0.025476	1.06729e+06	660270	208796	61.8639	456353	439436	138962	96.2929	0.42758	-1.22573	0.12991	Down
A0A5C2FWR3		IGL c560_light_IGKV3-20_IGKJ1 (Fragment)		2.06415e+06	616917	535030	852872	696371	982235	623473	153521	697439	284934	1.84866e+06	1.31959e+06	2.18415e+06	1.67263e+06	2327939	2158274	673272	1.70053e+06	417064	364517	0.0224102	1.46666e+06	741277	234412	50.5418	750694	521659	164963	69.4901	0.511839	-0.966239	0.123471	Down
A0A5C2FWW0		IGL c1578_light_IGKV1-5_IGKJ1 (Fragment)		415224	634116	250.019	410452	414267	763005	47757.4	612944	90292.9	289507	96920.9	250.019	250.019	250.019	183411	250.019	189117	76771	78622.4	111681	0.00301539	73752.4	73750.8	23322.1	99.9979	367782	261214	82603.1	71.0242	4.98671	2.31809	0.0375423	Up
A0A5C2FWW2		IGL c1521_light_IGKV1-39_IGKJ1 (Fragment)		210590	218028	75847.5	1.44686e+06	523982	269850	587133	75205	444657	617726	74067.8	6729.43	29295.8	134222	32738.3	161785	44993.5	52896.5	109030	166567	0.0110299	81232.6	57849.1	18293.5	71.2142	446988	404162	127807	90.4189	5.50257	2.4601	0.0856466	Up
A0A5C2FWX2		IGL c620_light_IGLV1-44_IGLJ3 (Fragment)		1.86938e+06	634974	1.87113e+06	1.60262e+06	1.56764e+06	1.44136e+06	1.03173e+06	1.71275e+06	1.71481e+06	1565253	618522	508661	236972	167668	1.24158e+06	478361	531963	975768	927880	1.24742e+06	0.000191571	693480	385705	121971	55.6188	1.50116e+06	388146	122743	25.8564	2.16468	1.11416	0.00883958	Up
A0A5C2FWX3		IGL c1531_light_IGKV4-1_IGKJ4 (Fragment)		231605	434294	215239	333811	458671	141103	296446	307330	413558	438348	250.019	250.019	250.019	250.019	250.019	250.019	250.019	250.019	300926	460499	0.000809113	76342.5	164767	52104	215.826	327041	108656	34360	33.224	4.28386	2.09891	0.0173819	Up
A0A5C2FWX5		IGL c1322_light_IGKV3-15_IGKJ2 (Fragment)		4372.56	7352.92	3561.04	74607	66170	250.019	19442.5	48941.3	83016.3	51600.8	31996	250.019	250.019	250.019	17909.9	5538.3	1074.63	14448.6	250.019	18007.6	0.0228727	8997.52	11055.8	3496.14	122.876	35931.4	32399.5	10245.6	90.1702	3.99348	1.99765	0.124117	Up
A0A5C2FWX9		IGL c1459_light_IGKV1-33_IGKJ3 (Fragment)		763648	263360	250.019	250.019	1.12086e+06	250.019	250.019	793332	929425	250.019	250.019	250.019	250.019	250.019	250.019	250.019	250.019	250.019	247933	250.019	0.0244715	25018.3	78324.3	24768.3	313.068	387187	459820	145408	118.759	15.4762	3.95198	0.127288	Up
A0A5C2FX07		IGL c736_light_IGKV3-20_IGKJ1 (Fragment)		1.41691e+06	943394	250.019	60752.3	1.35073e+06	1.07028e+06	668290	210314	1.15223e+06	1.06401e+06	250.019	250.019	250.019	250.019	250.019	250.019	119691	975231	1.06248e+06	250.019	0.0149429	215915	425320	134498	196.985	793716	529363	167399	66.6943	3.67605	1.87816	0.102773	Up
A0A5C2FX08		IGL c1489_light_IGKV1-12_IGKJ4 (Fragment)		623854	638316	69123.7	240135	535637	106771	134241	211571	689509	419086	250.019	93160.4	250.019	4837.48	45775.2	351185	250.019	70517.1	15422.7	184165	0.0029129	76581.3	112846	35685.2	147.355	366824	241667	76421.9	65.881	4.79	2.26002	0.0369053	Up
A0A5C2FX11		IGL c1214_light_IGKV3-20_IGKJ1 (Fragment)		13436932	11372138	10860823	18267196	8515258	7878236	9256734	6.13893e+06	7216455	12117046	5.95764e+06	3.04112e+06	2944703	5.45409e+06	6889499	6162629	5.17773e+06	6757788	9837812	13700724	0.0185095	6592374	3.17942e+06	1.00542e+06	48.2288	1.0506e+07	3.56868e+06	1.12852e+06	33.9681	1.59366	0.67234	0.113395	Up
A0A5C2FX45		IGL c1539_light_IGKV3-15_IGKJ1 (Fragment)		25319	469534	337884	880005	214122	424075	225025	304464	359961	278972	40168.6	76064.9	373543	103799	250.019	35480.9	121935	39202.6	388471	271035	0.0242489	144995	145108	45887.1	100.078	351936	222986	70514.5	63.3599	2.42723	1.27931	0.1268	Up
A0A5C2FXA4		IGL c1611_light_IGKV3-11_IGKJ5 (Fragment)		6.81427e+06	6.11441e+06	4841493	7.22125e+06	8442339	2.93526e+06	4482184	3.50315e+06	7808811	4926555	5.48028e+06	1.26107e+06	1.61423e+06	1.32998e+06	4562500	1.35594e+06	3.04613e+06	3.52745e+06	4483686	6.45827e+06	0.0105376	3.31195e+06	1.90022e+06	600902	57.3746	5.70897e+06	1.8554e+06	586728	32.4997	1.72375	0.785548	0.0842761	Up
A0A5C2FXH8		IGL c900_light_IGKV3-20_IGKJ2 (Fragment)		188062	71461.8	491326	179433	541712	4336.12	33423	840227	289951	531338	173800	250.019	250.019	23099.6	51698.2	34818.9	250.019	170365	10060	250.019	0.00718099	46484.2	68429.2	21639.2	147.21	317127	273930	86624.2	86.3785	6.82225	2.77025	0.0647415	Up
A0A5C2FXJ6		IGL c335_light_IGKV3-20_IGKJ2 (Fragment)		250.019	250.019	250.019	250.019	250.019	250.019	227930	250.019	255033	250.019	250.019	820449	250.019	237787	519410	1.06617e+06	603776	610351	250.019	250.019	0.0168765	385895	392162	124012	101.624	48496.3	101913	32227.6	210.145	0.125673	-2.99226	0.108261	Down
A0A5C2FXJ7		IGL c1721_light_IGKV3-15_IGKJ2 (Fragment)		250.019	55373.2	200670	185804	168019	56158.9	393279	392417	786122	220517	250.019	250.019	250.019	250.019	47477.6	8519.15	104372	250.019	169996	77151.2	0.0140621	40876.6	59031.6	18667.4	144.414	245861	230950	73032.8	93.9351	6.01471	2.5885	0.0991242	Up
A0A5C2FXM3		IGL c1669_light_IGKV3-20_IGKJ1 (Fragment)		1.14696e+06	1079656	2.19647e+06	1.39651e+06	722753	55333.1	1.60941e+06	916200	934168	1.1082e+06	157902	10994.7	250.019	87845.1	70238	61233.8	250.019	973176	13945	90329	0.000133723	146616	294753	93209.2	201.037	1.11657e+06	562192	177781	50.3501	7.61555	2.92895	0.00739589	Up
A0A5C2FXN1		IGL c1679_light_IGLV3-21_IGLJ3 (Fragment)		99235.7	363071	85055.9	210153	102791	54343.5	230611	76338.7	60105.6	117559	785376	790426	422690	562390	306774	250.019	1.24198e+06	1.1279e+06	294162	521656	0.0016503	605360	385769	121991	63.7256	139926	98451.4	31133.1	70.3594	0.231146	-2.11312	0.0265771	Down
A0A5C2FXP5		IGL c17_light_IGKV2D-28_IGKJ4 (Fragment)		250.019	250.019	250.019	250.019	250.019	250.019	250.019	250.019	250.019	250.019	140018	50993.4	25520.9	45442.1	1336.19	4072.22	21651.6	40532.2	250.019	250.019	0.0250131	33006.7	42370.6	13398.8	128.37	250.019	0	0	0	0.00757481	-7.04457	0.12869	Down
A0A5C2FXP8		IGL c395_light_IGKV3-15_IGKJ3 (Fragment)		687713	264247	175598	339323	214324	494754	383699	598709	491565	551007	313742	5012.76	250.019	161235	78614.1	22564.9	280321	59350.8	193291	250.019	0.000187822	111463	118495	37471.3	106.308	420094	171788	54324.2	40.8928	3.76891	1.91415	0.00883958	Up
A0A5C2FXQ6		IGL c405_light_IGKV3-11_IGKJ4 (Fragment)		250.019	250.019	250.019	250.019	250.019	2109.39	250.019	250.019	250.019	250.019	6289.86	250.019	15817.3	250.019	5472.54	250.019	4023.26	6659.35	250.019	250.019	0.0402284	3951.24	4993.57	1579.1	126.38	435.957	587.985	185.937	134.872	0.110334	-3.18005	0.168654	Down
A0A5C2FXQ9		IGL c1719_light_IGKV1-27_IGKJ2 (Fragment)		254061	688057	6.22799e+06	3.43451e+06	2.29441e+06	407933	1.54144e+06	3.37278e+06	763220	849200	467811	250.019	51197.5	76247.3	326755	2349.67	891545	4355.56	331105	80631	0.00942238	223225	288052	91090.2	129.041	1.98336e+06	1.89357e+06	598801	95.473	8.88504	3.15138	0.07787	Up
A0A5C2FXR8		IGL c415_light_IGKV3-20_IGKJ2 (Fragment)		422221	247840	579492	374416	335346	254324	384137	367910	374300	155062	92886.5	250.019	8057.89	250.019	250.019	31436.9	12714.7	57607.4	186038	514682	0.000589626	90417.3	160179	50653.1	177.155	349505	114678	36264.3	32.8115	3.86546	1.95064	0.0149927	Up
A0A5C2FXS4		IGL c1141_light_IGKV3-20_IGKJ4 (Fragment)		4.10293e+06	1.7926e+06	2.86535e+06	3.58159e+06	3.41737e+06	2.17491e+06	4552545	3.27294e+06	1.52822e+06	1.17852e+06	1.97881e+06	153695	213072	2.35087e+06	793156	206969	848533	1455681	1.33357e+06	1.69166e+06	0.000842882	1.1026e+06	782096	247320	70.9319	2.8467e+06	1.13624e+06	359311	39.9144	2.5818	1.36838	0.0175661	Up
A0A5C2FXS5		IGL c1682_light_IGKV1-12_IGKJ1 (Fragment)		250.019	250.019	1.45569e+06	250.019	639311	250.019	250.019	489957	250.019	320325	1.00797e+06	1985904	2.60517e+06	2.71818e+06	672723	2.97183e+06	838035	250.019	1.09265e+06	250.019	0.00983316	1.3893e+06	1.10626e+06	349830	79.6274	290678	474398	150018	163.204	0.209227	-2.25686	0.0803414	Down
A0A5C2FXW8		IGL c1868_light_IGKV2-30_IGKJ4 (Fragment)		250.019	250.019	250.019	250.019	250.019	250.019	250.019	250.019	250.019	250.019	92551.6	82431.2	39864.9	66588.9	29352.5	75066.3	247940	32867.5	250.019	250.019	0.00870902	66716.3	71433.3	22589.2	107.07	250.019	0	0	0	0.0037475	-8.05986	0.0736119	Down
A0A5C2FXX2		IGL c1732_light_IGKV3-15_IGKJ1 (Fragment)		714396	2.20143e+06	4412479	1.23162e+06	4.93333e+06	7848905	1.66703e+06	2376269	1.29522e+06	2.64557e+06	59428.4	896622	239562	1.12261e+06	267411	523530	352782	9125.2	1.67514e+06	145655	0.00347518	529187	539770	170690	102	2.93262e+06	2.1956e+06	694310	74.8681	5.54175	2.47034	0.0408468	Up
A0A5C2FXX6		IGL c1811_light_IGLV1-40_IGLJ3 (Fragment)		2.45553e+06	1.08536e+06	589820	1.21034e+06	1.13699e+06	721310	796237	252303	991357	1.16987e+06	98313.3	64936.5	425598	79305.9	880434	15380.9	1.2793e+06	47273.3	678002	819364	0.0185312	438791	449843	142253	102.519	1.04091e+06	581906	184015	55.9036	2.37222	1.24624	0.113395	Up
A0A5C2FXZ2		IGL c1831_light_IGLV2-14_IGLJ1 (Fragment)		632869	462701	26588.5	307100	250.019	250.019	910150	386444	72644.3	604793	1.66008e+06	465414	66820.9	476788	1.96194e+06	432862	2.01378e+06	5.33509e+06	180791	1.45559e+06	0.0498472	1.40492e+06	1.5696e+06	496352	111.722	340379	316196	99989.9	92.8952	0.242277	-2.04527	0.191147	Down
A0A5C2FY75		IGL c1842_light_IGKV1D-43_IGKJ1 (Fragment)		15835721	14260664	10483175	9114798	11573916	12102601	12973153	9610030	8871345	11027451	1812711	6341316	7.55885e+06	4764975	1.31872e+06	14955165	2.36052e+06	1.4333e+06	5334930	7464380	0.000576093	5.33449e+06	4.16297e+06	1.31645e+06	78.0388	1.15853e+07	2.26848e+06	717356	19.5807	2.17177	1.11887	0.0149224	Up
A0A5C2FY76		IGL c575_light_IGKV1-12_IGKJ4 (Fragment)		956085	1.41713e+06	711591	592283	441235	292971	796666	600916	1.06068e+06	790492	504350	122506	27132.9	71703.3	198242	83464.3	275245	463130	581727	551226	0.00108588	287873	217388	68744.2	75.5155	766005	322853	102095	42.1476	2.66092	1.41192	0.0202792	Up
A0A5C2FYA2		IGL c1872_light_IGKV3-20_IGKJ2 (Fragment)		631734	71105.2	639688	648814	74100.2	57156.3	401834	326372	446732	557003	71298.7	15965.2	250.019	250.019	249725	64017	37572.5	413343	81779.2	479679	0.0195561	141388	176678	55870.6	124.96	385454	243841	77109.3	63.2607	2.72621	1.4469	0.116446	Up
A0A5C2FYH6		IGL c2011_light_IGKV1D-33_IGKJ4 (Fragment)		2517374	3.31871e+06	1505661	5.57652e+06	3.95338e+06	1.35127e+06	2.26919e+06	3.95107e+06	3.88389e+06	4422998	2.19051e+06	884296	437276	797169	1.63211e+06	1542124	1.41553e+06	2.50204e+06	2.26566e+06	2.13331e+06	0.00239372	1.58e+06	701823	221936	44.4191	3.27501e+06	1.34667e+06	425856	41.1198	2.07279	1.05157	0.0328874	Up
A0A5C2FYI2		IGL c1226_light_IGKV1-5_IGKJ1 (Fragment)		1.20406e+06	1.08874e+06	817190	161221	1.0302e+06	250.019	340023	749283	292612	3.83038e+06	614938	250.019	53144.5	31573.3	433848	375989	72846	2957.08	281367	202142	0.0489124	206906	213127	67396.7	103.007	951396	1.09408e+06	345979	114.998	4.59821	2.20107	0.18933	Up
A0A5C2FYI3		IGL c2078_light_IGLV3-1_IGLJ2 (Fragment)		1.26811e+06	1.35767e+06	1.06315e+06	811312	718767	537380	1.01618e+06	1.21313e+06	1.48507e+06	250.019	250.019	929565	644696	887356	321707	345099	250.019	470170	761843	373088	0.0147127	473402	331541	104842	70.0336	947102	445347	140831	47.0221	2.00063	1.00045	0.102207	Up
A0A5C2FYI7		IGL c1949_light_IGKV4-1_IGKJ1 (Fragment)		8333018	1.95905e+06	604342	6157158	2309991	3676069	2924168	3.3612e+06	3970028	6347521	461379	108105	250.019	2.84736e+06	1.27375e+06	370590	250.019	2.24678e+06	3.0758e+06	1.92506e+06	0.00411404	1.23093e+06	1.20896e+06	382307	98.215	3.96425e+06	2.3369e+06	738992	58.9492	3.22053	1.6873	0.0446489	Up
A0A5C2FYY5		IGL c1376_light_IGKV3-15_IGKJ1 (Fragment)		494178	588742	920540	722672	1.22619e+06	893922	1.30154e+06	856389	1.73974e+06	920168	201195	106065	355052	28515.6	376579	376061	160587	641783	525030	259713	8.20953e-05	303058	189788	60016.4	62.6244	966408	368855	116642	38.1677	3.18886	1.67304	0.00562157	Up
A0A5C2FYZ9		IGL c1894_light_IGKV3-20_IGKJ1 (Fragment)		483504	846902	685353	74637.2	10621.3	75499	394693	197192	35446.5	45804.4	23914.8	45735.4	246948	83264.3	32110.2	7054.33	24300.4	7743.08	61124.5	94260.1	0.0357755	62645.5	71248.9	22530.9	113.734	284965	301493	95340.4	105.8	4.54886	2.1855	0.157807	Up
A0A5C2FZ22		IGL c517_light_IGKV1-39_IGKJ2 (Fragment)		92301.3	305939	50868.4	4920902	3829517	6405046	3.08731e+06	2.33963e+06	487130	6.22659e+06	250.019	932533	723222	75676.5	434007	104851	33628.7	1.38242e+06	1.94799e+06	2.96251e+06	0.0379069	859708	982632	310736	114.298	2.77452e+06	2.51756e+06	796123	90.7385	3.22729	1.69032	0.163204	Up
A0A5C2FZC1		IGL c2311_light_IGKV3-20_IGKJ1 (Fragment)		184864	372047	368020	324485	337769	1.03493e+06	435819	750363	391633	114052	242601	250.019	250.019	250.019	75089.8	11634.1	54611.2	250.019	65111.8	97218.8	0.000485569	54726.7	75537.1	23886.9	138.026	431398	270146	85427.7	62.6211	7.88277	2.9787	0.0140355	Up
A0A5C2FZC3		IGL c533_light_IGLV1-44_IGLJ1 (Fragment)		250.019	252747	250.019	250.019	844261	250.019	90387.9	506553	250.019	426171	32971.3	250.019	250.019	250.019	250.019	250.019	250.019	250.019	250.019	250.019	0.0372274	3522.15	10347.4	3272.13	293.78	212137	293073	92677.7	138.153	60.2293	5.91239	0.161843	Up
A0A5C2FZH8		IGL c1075_light_IGKV3-20_IGKJ5 (Fragment)		250.019	18113.5	64229.8	250.019	47060.8	250.019	27292.6	11645.5	250.019	250.019	632373	453493	689727	515103	523664	54885.4	568416	527796	48176.4	250.019	0.000209636	401388	261768	82778.3	65.2156	16959.2	22786.3	7205.67	134.359	0.0422514	-4.56486	0.00907767	Down
A0A5C2FZR7		IGL c1770_light_IGKV1-12_IGKJ3 (Fragment)		91515.8	120565	109615	153479	130839	179529	157602	161868	150365	94768.1	250.019	250.019	250.019	4089.05	10719	12590.9	250.019	250.019	11669.5	338104	0.0119015	37842.2	105631	33403.3	279.134	135015	30134.3	9529.31	22.3193	3.56783	1.83505	0.0889232	Up
A0A5C2FZS2		IGL c1626_light_IGLV1-40_IGLJ3 (Fragment)		2.09522e+06	10770.4	1.42471e+06	1.12593e+06	1.63083e+06	3.4634e+06	2574335	2.21816e+06	2875452	1.94102e+06	7275252	10910253	1.10006e+06	250.019	3.32441e+06	4.89544e+06	11444676	1.87204e+06	5718561	2.98089e+06	0.0299915	4.95218e+06	3.93025e+06	1.24285e+06	79.3639	1.93598e+06	968690	306327	50.036	0.390935	-1.355	0.143282	Down
A0A5C2FZT1		IGL c1175_light_IGKV3-20_IGKJ1 (Fragment)		250.019	14385.5	250.019	5645.2	115087	5815.35	250.019	4144.83	400973	11758.9	317474	531241	250.019	195813	526611	73391.3	339563	343767	250.019	250.019	0.0344395	232861	209574	66273.1	89.9996	55856	126163	39896.2	225.872	0.239868	-2.05969	0.154041	Down
A0A5C2FZT2		IGL c1636_light_IGKV1-9_IGKJ4 (Fragment)		2.10594e+06	2057634	2554592	4418193	2621977	2808501	1.9191e+06	2.61532e+06	2.23698e+06	1.90592e+06	992017	1.43571e+06	387719	1.30029e+06	517095	3.14488e+06	2840347	2.28129e+06	2.0032e+06	1.3033e+06	0.0269546	1.62059e+06	928823	293720	57.314	2.52442e+06	738644	233580	29.26	1.55772	0.639435	0.134926	Up
A0A5C2FZW2		IGL c2439_light_IGKV4-1_IGKJ2 (Fragment)		1091211	1.0585e+06	717773	819405	988125	633780	958218	1.0271e+06	1.35087e+06	1.51266e+06	174436	111463	143959	51216	542534	250.019	844146	250.019	566949	1.29149e+06	0.000826268	372669	431235	136368	115.715	1.01576e+06	267538	84602.8	26.3386	2.72565	1.4466	0.0175661	Up
A0A5C2FZX7		IGL c2459_light_IGKV1-8_IGKJ5 (Fragment)		64413.5	242313	12929.9	159740	185405	176237	103189	142802	230580	390066	3151.51	3424.56	250.019	8460.43	250.019	250.019	3481.27	250.019	347658	189219	0.0332965	55639.5	118236	37389.5	212.504	170768	104736	33120.5	61.3325	3.06918	1.61785	0.151872	Up
A0A5C2G003		IGL c867_light_IGKV3-20_IGKJ2 (Fragment)		426014	26280	30662.7	22434.9	56894.1	67940.4	181792	159718	383821	95760.9	250.019	250.019	30040.8	250.019	250.019	15754.5	250.019	250.019	250.019	63502.9	0.0107634	11104.8	20951.1	6625.32	188.666	145132	147531	46653.5	101.653	13.0692	3.7081	0.0845779	Up
A0A5C2G013		IGL c2304_light_IGKV1-39_IGKJ4 (Fragment)		1.43674e+06	1.37564e+06	988222	3.40429e+06	1.74578e+06	1.01872e+06	1.30218e+06	2.28773e+06	2.8776e+06	2.15627e+06	555122	108391	250.019	291309	102288	460318	26348.3	643195	1.09876e+06	1.42087e+06	0.000189523	470686	477520	151005	101.452	1.85932e+06	809442	255968	43.5343	3.95024	1.98194	0.00883958	Up
A0A5C2G041		IGL c2529_light_IGKV3-20_IGKJ1 (Fragment)		276062	513112	362428	1.01066e+06	397249	13752.9	250.019	491124	257008	659403	185229	186206	70235.3	250.019	169490	24252.8	77070.3	288137	250.019	366146	0.0201678	136727	124416	39343.8	90.9963	398105	299532	94720.3	75.2394	2.91169	1.54186	0.118615	Up
A0A5C2G080		IGL c1940_light_IGKV3-20_IGKJ5 (Fragment)		922472	430402	2.05265e+06	250.019	432716	949726	505897	525205	390875	966989	277141	47887.4	130816	59672.3	126563	153348	141627	197110	31740.4	38693.6	0.00357464	120460	78610.9	24859	65.2591	717718	558492	176611	77.8149	5.95815	2.57486	0.0417914	Up
A0A5C2G099		IGL c977_light_IGKV3-20_IGKJ3 (Fragment)		2.75298e+06	780580	2.38292e+06	2.26337e+06	2.12347e+06	1.50915e+06	1.46453e+06	1.09529e+06	1.59014e+06	2.92114e+06	113377	250.019	250.019	423134	284795	776889	742716	1090979	1.95142e+06	2.4649e+06	0.00523218	784871	839443	265455	106.953	1.88836e+06	708929	224183	37.5421	2.40594	1.2666	0.0527642	Up
A0A5C2G0C7		IGL c2435_light_IGKV3-20_IGKJ1 (Fragment)		392438	367513	2.77489e+06	736335	728384	1.63222e+06	578567	3.66797e+06	461194	2.80054e+06	71732.9	981377	244769	308539	494962	330575	192360	183356	94955.9	188613	0.0123478	309124	266095	84146.6	86.0803	1.414e+06	1.2282e+06	388391	86.8598	4.57423	2.19353	0.090824	Up
A0A5C2G0F1		IGL c1886_light_IGKV1-12_IGKJ4 (Fragment)		82011.7	53541.7	222229	129381	143272	7924.7	250.019	18324.5	26672.5	21488.4	250.019	250.019	250.019	250.019	12314.7	250.019	250.019	57714.5	250.019	16590.7	0.0185309	8837.01	18188.4	5751.69	205.821	70509.5	73106.1	23118.2	103.683	7.97889	2.99619	0.113395	Up
A0A5C2G0G3		IGL c1445_light_IGKV3-20_IGKJ4 (Fragment)		250.019	250.019	204068	250.019	250.019	250.019	250.019	250.019	250.019	250.019	519512	203920	321975	321842	161880	250.019	220394	182500	250.019	250.019	0.0070738	193277	167747	53046.1	86.7907	20631.8	64452.8	20381.8	312.396	0.106747	-3.22773	0.0641775	Down
A0A5C2G0H9		IGL c1926_light_IGKV2-30_IGKJ2 (Fragment)		250.019	250.019	16314.8	7543.46	250.019	250.019	4204.71	250.019	250.019	5910.17	50846.8	23369.9	11100.6	27300.3	7324.69	15593	67926.5	7693.79	6416.63	11027.5	0.0108264	22860	20835.5	6588.77	91.1441	3547.32	5272.84	1667.42	148.643	0.155176	-2.68802	0.0846104	Down
A0A5C2G0I7		IGL c2788_light_IGKV3-20_IGKJ4 (Fragment)		3.09126e+06	323346	837612	4.66154e+06	7873829	2507119	3.02283e+06	1.86221e+06	2722547	2.40711e+06	2693428	250.019	250.019	250.019	1465118	250.019	1.33794e+06	1.62458e+06	1.30495e+06	3034411	0.0303428	1.14614e+06	1.13552e+06	359082	99.0728	2930940	2.11562e+06	669016	72.1822	2.55722	1.35458	0.143766	Up
A0A5C2G0P9		IGL c2702_light_IGKV3-20_IGKJ1 (Fragment)		250.019	250.019	250.019	250.019	250.019	250.019	250.019	3583.1	250.019	10152	250.019	47813.7	250.019	82417.4	60334.7	250.019	54292.4	4224.87	71394.4	30881.6	0.0041035	35210.9	32210.2	10185.8	91.478	1573.52	3190.98	1009.08	202.792	0.0446885	-4.48395	0.0446489	Down
A0A5C2G0S7		IGL c2742_light_IGKV3-20_IGKJ1 (Fragment)		4.7062e+06	3138711	3671901	3.34237e+06	4639336	3.01593e+06	3.97715e+06	3723542	3.59058e+06	3.6545e+06	2.90091e+06	1.65053e+06	2.23596e+06	2.15458e+06	1.81085e+06	2.09978e+06	1.34942e+06	1783707	2.55025e+06	3.26679e+06	9.76781e-06	2.18028e+06	587995	185940	26.9688	3.74602e+06	565362	178783	15.0923	1.71814	0.780848	0.00146779	Up
A0A5C2G130		IGL c2250_light_IGLV3-10_IGLJ3 (Fragment)		1.06804e+06	444758	250.019	400977	241598	565109	1.91963e+06	1.60984e+06	250.019	1.07904e+06	18058.4	94496.6	163578	206799	73875.2	163691	29288.5	57509.5	919329	234121	0.0285263	196075	264727	83714	135.013	732949	662132	209385	90.3381	3.73812	1.90231	0.139054	Up
A0A5C2G172		IGL c73_light_IGKV2D-28_IGKJ5 (Fragment)		250.019	250.019	250.019	250.019	250.019	250.019	250.019	250.019	250.019	250.019	67685.1	50151.4	119334	250.019	4396.69	87157.3	250.019	15230.2	250.019	250.019	0.0236889	34495.4	43824.8	13858.6	127.045	250.019	0	0	0	0.0072479	-7.10822	0.125755	Down
A0A5C2G1B1		IGL c2912_light_IGLV2-14_IGLJ1 (Fragment)		250.019	370987	117394	283596	250.019	250.019	30452.3	250.019	250.019	250.019	237856	250.019	250.019	478843	250.019	455981	405510	415780	251023	350261	0.0286746	259600	195183	61722.3	75.186	80392.8	136681	43222.5	170.017	0.309679	-1.69115	0.139149	Down
A0A5C2G1D9		IGL c143_light_IGKV1D-39_IGKJ2 (Fragment)		3.90065e+06	4481091	6.81794e+06	5.72427e+06	5.66021e+06	2.62586e+06	3.00192e+06	3.91848e+06	9845045	9442539	5221076	5.28643e+06	3.31495e+06	1.84559e+06	1.20633e+06	5185942	2.11369e+06	2633940	2.25569e+06	3.56894e+06	0.024475	3.26326e+06	1.5163e+06	479497	46.4659	5.5418e+06	2.51257e+06	794543	45.3385	1.69824	0.764041	0.127288	Up
A0A5C2G1F8		IGL c2286_light_IGLV1-40_IGLJ3 (Fragment)		1.63455e+06	692940	1.34452e+06	1458751	622990	584761	346131	1.74489e+06	720779	1.2618e+06	52589.5	250.019	234625	20331.3	548801	216677	234639	250.019	1063853	65929.1	0.000547174	243794	333864	105577	136.945	1.04121e+06	500285	158204	48.0484	4.27085	2.09452	0.0146669	Up
A0A5C2G1I1		IGL c1327_light_IGKV3-15_IGKJ1 (Fragment)		250.019	250.019	250.019	250.019	250.019	250.019	250.019	250.019	250.019	250.019	36326.8	250.019	42450.7	250.019	9059.65	250.019	55663.1	58576	250.019	250.019	0.020266	20332.6	24943.2	7887.72	122.676	250.019	0	0	0	0.0122965	-6.34561	0.118707	Down
A0A5C2G1I8		IGL c2992_light_IGLV3-25_IGLJ2 (Fragment)		1.77194e+06	872769	972650	1.20735e+06	1.36954e+06	1.05595e+06	868920	1.53324e+06	1.06553e+06	915082	313743	575018	786517	850395	332772	684417	216603	1.45524e+06	493083	621784	0.00216134	632957	355600	112451	56.1807	1.1633e+06	305847	96717.2	26.2914	1.83788	0.87804	0.031394	Up
A0A5C2G1J4		IGL c2326_light_IGKV1-39_IGKJ1 (Fragment)		35366.9	10042.4	733.975	250.019	35001.9	18640.6	12797.9	18576.5	3327.35	1606.52	250.019	20166.1	250.019	250.019	9498	5803.54	250.019	250.019	250.019	250.019	0.0488397	3721.78	6603.75	2088.29	177.435	13634.4	13285	4201.09	97.4375	3.66341	1.87319	0.189303	Up
A0A5C2G1V9		IGL c1935_light_IGKV3-20_IGKJ5 (Fragment)		297979	624382	250.019	250.019	322767	336586	406020	373870	250.019	603383	250.019	168999	518635	250.019	250.019	250.019	250.019	250.019	250.019	250.019	0.0214768	68963.4	166661	52702.9	241.666	296574	232201	73428.4	78.2945	4.30045	2.10449	0.121112	Up
A0A5C2G1W2		IGL c2904_light_IGKV4-1_IGKJ4 (Fragment)		206903	144469	75638.4	322507	210457	244583	245679	182218	24274.6	135432	41017	48396	59472.1	51399.2	55445.8	45864.6	62705.1	75528.4	58083.5	250.019	0.0002416	49816.2	19930.1	6302.46	40.0073	179216	87453.9	27655.3	48.798	3.59755	1.84701	0.00965059	Up
A0A5C2G1X9		IGL c343_light_IGKV3-20_IGKJ1 (Fragment)		1.95292e+06	84109.8	121752	1.18232e+06	611899	45749.8	1.82976e+06	776297	814810	840727	7454.75	231322	250.019	64458.8	51262.3	437607	250.019	492397	227628	54384.4	0.00730817	156701	183643	58072.9	117.193	826034	675628	213652	81.7917	5.27139	2.39818	0.0652994	Up
A0A5C2G221		IGL c3321_light_IGKV3-20_IGKJ1 (Fragment)		899364	972482	785433	689695	562658	882079	562687	811945	1.01234e+06	759240	174802	128086	787066	719494	65477.8	230022	194648	993711	531969	465533	0.0045839	429081	320635	101394	74.726	793792	155597	49204.1	19.6018	1.84998	0.887512	0.0481142	Up
A0A5C2G252		IGL c2526_light_IGKV1-17_IGKJ1 (Fragment)		522862	31627778	29486588	866061	559860	34051024	15328770	3.39014e+06	2.10189e+06	1.97028e+06	5532076	250.019	250.019	2.23449e+06	744938	621909	5.04489e+06	250.019	1.03246e+06	1.03944e+06	0.036111	1.62509e+06	2.0474e+06	647443	125.986	1.19905e+07	1.4328e+07	4.53091e+06	119.494	7.37835	2.8833	0.159037	Up
A0A5C2G267		IGL c3259_light_IGKV3-11_IGKJ5 (Fragment)		294782	819788	897348	181379	7.65686e+06	576932	5.22032e+06	353244	6.85707e+06	4980161	48226.7	15869.2	24937.4	25764.6	25528	15909.4	26184.6	13173.3	67610.6	747767	0.0118845	101097	227827	72045.4	225.355	2.78379e+06	3.02325e+06	956036	108.602	27.5358	4.78324	0.0889232	Up
A0A5C2G280		IGL c2055_light_IGKV3-20_IGKJ3 (Fragment)		227021	110402	50917.5	25315.4	186179	22907.7	167216	75538.3	224330	89827.1	250.019	250.019	250.019	250.019	63289.5	250.019	250.019	250.019	250.019	41881.1	0.000581123	10717.1	22636.1	7158.16	211.215	117965	78209	24731.8	66.2982	11.0072	3.46038	0.0149224	Up
A0A5C2G288		IGL c3398_light_IGKV1-9_IGKJ4 (Fragment)		1.44818e+06	388755	103512	502092	831402	370490	68897.2	1.99286e+06	1.12809e+06	1.36446e+06	12567.7	250.019	118536	250.019	24299.3	21528.7	113074	250.019	887284	828996	0.0155057	200704	349561	110541	174.168	819873	643627	203533	78.5032	4.085	2.03034	0.104433	Up
A0A5C2G292		IGL c2680_light_IGKV1-12_IGKJ3 (Fragment)		313047	141202	138901	160013	27593.2	138659	283704	107239	271004	16857.9	136113	4995.43	10395.1	250.019	19945.3	9869.31	162602	250.019	138892	141076	0.0233118	62438.9	71338	22559.1	114.253	159822	101711	32163.9	63.6402	2.55966	1.35595	0.125043	Up
A0A5C2G2C0		IGL c2586_light_IGKV1-9_IGKJ4 (Fragment)		2133994	385103	1.1366e+06	1.99488e+06	1.43328e+06	1.86617e+06	2.04181e+06	1.1461e+06	2.22534e+06	1.38254e+06	1.23832e+06	250.019	1.35702e+06	983598	1.21102e+06	899176	1310604	462522	1.40485e+06	1.05386e+06	0.0219355	992124	446004	141039	44.9544	1.57458e+06	583433	184498	37.0532	1.58708	0.666377	0.121788	Up
A0A5C2G2K9		IGL c3511_light_IGKV1-9_IGKJ4 (Fragment)		31180.4	28571.9	250.019	218185	82222.4	44856.9	66617.1	68558.7	187746	49243.7	12451.9	250.019	26599.8	250.019	3245.17	250.019	57711.4	22647	35646.3	97904.9	0.0467993	25695.7	31570.3	9983.41	122.863	77743.2	70346.5	22245.5	90.4856	3.02554	1.59719	0.183622	Up
A0A5C2G2S0		IGL c2890_light_IGLV1-44_IGLJ2 (Fragment)		749518	738136	507670	900521	1057891	1.31449e+06	2.21353e+06	1.08102e+06	1.07463e+06	1257762	347288	435624	190160	412668	960492	1.01945e+06	613970	501986	732879	830800	0.0110241	604532	274947	86945.8	45.481	1.08952e+06	466303	147458	42.7991	1.80225	0.849798	0.0856466	Up
A0A5C2G2S4		IGL c3452_light_IGKV3-20_IGKJ1 (Fragment)		1.44188e+06	1.61774e+06	952415	2304378	4.19575e+06	1.98284e+06	1.9097e+06	1.14745e+06	2.84327e+06	2653464	2.79564e+06	359457	705369	1.21869e+06	1.29858e+06	285862	707788	603320	1.54089e+06	2314409	0.0340062	1.183e+06	836426	264501	70.7038	2.10489e+06	956407	302442	45.4374	1.77928	0.831293	0.15336	Up
A0A5C2G316		IGL c2990_light_IGLV2-8_IGLJ3 (Fragment)		5.83483e+06	3.34144e+06	7143411	6066650	3.24846e+06	4299598	5119993	5749290	6.11204e+06	7.92626e+06	1.05269e+06	1.67837e+06	1.08937e+06	3900336	3.18856e+06	3.69704e+06	1.7536e+06	4.35797e+06	5822548	5.53918e+06	0.00624267	3.20797e+06	1.7607e+06	556782	54.8852	5.4842e+06	1.51911e+06	480383	27.6997	1.70955	0.773621	0.0582919	Up
A0A5C2G321		IGL c753_light_IGLV2-14_IGLJ2 (Fragment)		154908	18720	152811	34400.7	21062.1	5275.14	27192.6	40753.7	3517.34	11086.6	250.019	7759.49	250.019	250.019	250.019	5584.08	250.019	523.055	250.019	8854.84	0.0251172	2422.16	3524.2	1114.45	145.498	46972.8	57565.7	18203.9	122.551	19.3929	4.27746	0.128765	Up
A0A5C2G363		IGL c3040_light_IGKV1-5_IGKJ1 (Fragment)		2491861	9677757	1.34675e+06	2028679	2.73389e+06	8090522	2.65206e+06	2.16523e+06	2.52681e+06	2.41531e+06	1.37683e+06	3.08351e+06	648380	240141	202581	525448	410540	494657	1.02987e+06	2.72149e+06	0.0157648	1.07334e+06	1.03056e+06	325893	96.0143	3.61289e+06	2.83115e+06	895290	78.3627	3.36601	1.75104	0.104711	Up
A0A5C2G393		IGL c3579_light_IGKV1-8_IGKJ1 (Fragment)		1.82002e+06	397631	529311	1.9925e+06	1200360	481367	661403	494318	749046	1.36832e+06	106069	250.019	78406.1	33198.2	68150.6	44995.4	22034.7	29495.6	700834	1.07885e+06	0.00294688	216229	367282	116145	169.858	969428	587902	185911	60.6442	4.48335	2.16458	0.0370617	Up
A0A5C2G3B3		IGL c3642_light_IGLV1-40_IGLJ1 (Fragment)		1.14089e+06	1.11616e+06	862160	937204	947004	1.35605e+06	597750	1.70265e+06	1.05719e+06	796972	1.45079e+06	246911	246215	137669	956590	270207	697826	391202	766934	393618	0.00699403	555796	411964	130274	74.1214	1.0514e+06	309022	97721.4	29.3914	1.89171	0.919689	0.0638566	Up
A0A5C2G3L5		IGL c2027_light_IGLV1-40_IGLJ3 (Fragment)		5459181	5622208	3753019	3.94503e+06	5.05357e+06	3.80215e+06	4261904	3651388	5.23477e+06	6.07101e+06	214070	1.05123e+06	386924	668605	2.6327e+06	456452	2.3636e+06	1.74889e+06	3086765	3.23887e+06	3.21587e-06	1.58481e+06	1.17542e+06	371700	74.1678	4.68542e+06	899369	284405	19.195	2.95646	1.56387	0.000985405	Up
A0A5C2G3L6		IGL c3878_light_IGKV1-5_IGKJ1 (Fragment)		1388155	262604	596375	650737	718428	414370	538282	412961	487288	609223	152841	77220.7	156471	90198.9	162266	250.019	53827	20012.7	330559	336533	0.00024948	138018	117192	37059.2	84.9104	607842	304970	96440.1	50.1726	4.40408	2.13884	0.00982715	Up
A0A5C2G3R3		IGL c3190_light_IGKV3-20_IGKJ1 (Fragment)		772494	2.09566e+06	297760	3.43348e+06	1.72755e+06	1.55735e+06	1.70223e+06	1.16638e+06	1.27435e+06	2.27443e+06	965180	14547.1	114593	18111.5	1.16933e+06	173707	16374.9	414852	1935300	2.68645e+06	0.0424817	750844	933323	295143	124.303	1.63017e+06	866428	273989	53.1497	2.17111	1.11844	0.173794	Up
A0A5C2G3R6		IGL c3779_light_IGKV3-20_IGKJ3 (Fragment)		250.019	250.019	58587.4	250.019	250.019	250.019	250.019	250.019	250.019	250.019	591444	250.019	1.26823e+06	355935	349059	353114	301511	250.019	250.019	250.019	0.0203629	322030	392332	124066	121.831	6083.75	18447.9	5833.74	303.232	0.0188919	-5.72609	0.118983	Down
A0A5C2G3R9		IGL c3941_light_IGKV3-11_IGKJ3 (Fragment)		250.019	250.019	250.019	250.019	250.019	250.019	250.019	250.019	33783.1	250.019	121351	250.019	250.019	12164.5	167561	250.019	136826	64178.4	250.019	250.019	0.0430352	50333.1	67046.5	21202	133.205	3603.33	10604.1	3353.31	294.286	0.0715895	-3.80411	0.175311	Down
A0A5C2G3S0		IGL c3136_light_IGKV3-11_IGKJ1 (Fragment)		4746.5	8048.01	645631	585458	671293	5099.75	9589.88	250.019	250.019	260833	704.602	9988.99	15920.6	45793.6	8577.03	4227.95	1906.32	250.019	4337.04	8369.29	0.0396573	10007.5	13471.3	4259.99	134.611	219120	297833	94182.9	135.922	21.8955	4.45256	0.167235	Up
A0A5C2G3Y2		IGL c3882_light_IGKV1-5_IGKJ5 (Fragment)		1.01743e+06	640024	1.359e+06	1.55123e+06	1.06026e+06	1.01507e+06	1.49431e+06	567749	544075	3.36562e+06	220369	291043	398754	235570	367130	171791	211640	331904	689944	427864	0.00257685	334601	151484	47903.5	45.2731	1.26148e+06	824484	260725	65.3587	3.77009	1.9146	0.0344698	Up
A0A5C2G435		IGL c1063_light_IGKV3-20_IGKJ4 (Fragment)		68148.5	25624.4	4160.31	5983.38	250.019	23620.1	26557.2	19760.1	250.019	64995.2	101720	34988.2	123343	123280	33802.9	213134	104357	133566	250.019	250.019	0.0133259	86869	68165.8	21555.9	78.4696	23934.9	24728	7819.69	103.314	0.275529	-1.85972	0.0960537	Down
A0A5C2G481		IGL c2745_light_IGKV1-6_IGKJ1 (Fragment)		66689.4	68285.6	108083	163834	412214	97898.1	185242	240037	70942.7	450537	58579	36531	10613.7	14018.2	25776.1	7291.82	51078.1	69418.2	6219.49	30528.3	0.0029639	31005.4	22553.5	7132.03	72.7404	186376	141314	44687.3	75.8218	6.01109	2.58763	0.0370617	Up
A0A5C2G4A5		IGL c4012_light_IGKV3-20_IGKJ2 (Fragment)		1.74695e+06	1.10936e+06	1.49778e+06	1.2313e+06	1.7149e+06	1.08618e+06	1571904	855863	1.18311e+06	1.13962e+06	1.09324e+06	413935	360717	593300	610531	580085	491110	415851	1.02397e+06	1.28186e+06	0.000284425	686459	325134	102816	47.3639	1.3137e+06	299353	94663.7	22.7871	1.91373	0.936386	0.0103545	Up
A0A5C2G4H2		IGL c4092_light_IGKV4-1_IGKJ4 (Fragment)		2.93082e+06	2585153	45381.1	4.29465e+06	3.10947e+06	3142413	2.85695e+06	1.56987e+06	2.74814e+06	3.45203e+06	2.31597e+06	250.019	250.019	250.019	1.41291e+06	250.019	250.019	1.66899e+06	1.83997e+06	2.32653e+06	0.00256525	956562	1.04316e+06	329877	109.053	2.67349e+06	1.14903e+06	363355	42.9787	2.79489	1.48279	0.0344698	Up
A0A5C2G4L9		IGL c3376_light_IGKV1-9_IGKJ3 (Fragment)		723126	1.19713e+06	904460	2.54544e+06	2.70207e+06	763763	1.25938e+06	1.24816e+06	889452	1.37278e+06	12169.2	250.019	250.019	250.019	145626	250.019	250.019	250.019	1638704	1953987	0.00731099	375199	754029	238445	200.968	1.36058e+06	702834	222256	51.6571	3.62628	1.85849	0.0652994	Up
A0A5C2G4P2		IGL c2487_light_IGKV2D-29_IGKJ2 (Fragment)		250.019	433146	250.019	250.019	321312	243193	45925.6	366912	250.019	250.019	250.019	250.019	250.019	250.019	250.019	250.019	46173.2	65912.5	28328.7	42212.4	0.0452935	18412.7	25101.9	7937.9	136.329	141174	178709	56512.8	126.588	7.6672	2.9387	0.181039	Up
A0A5C2G4R7		IGL c3426_light_IGKV1-27_IGKJ1 (Fragment)		1.50539e+06	1316062	949839	1.32933e+06	1.00173e+06	469091	771125	511402	1.07413e+06	848582	377139	114549	14038	106971	129343	250.019	9914.27	963991	1.07606e+06	887141	0.00268808	367940	435154	137608	118.268	977668	343625	108664	35.1474	2.65714	1.40988	0.0352145	Up
A0A5C2G4S5		IGL c3540_light_IGLV1-40_IGLJ2 (Fragment)		250.019	89965.2	99639.2	250.019	250.019	175436	57333.2	134442	250.019	62376.2	250.019	250.019	250.019	250.019	250.019	250.019	250.019	250.019	92033.9	250.019	0.0273563	9428.41	29024.6	9178.39	307.842	62019.2	62883.1	19885.4	101.393	6.57791	2.71763	0.13594	Up
A0A5C2G4Z6		IGL c4004_light_IGLV1-40_IGLJ2 (Fragment)		3.94072e+06	3.8523e+06	2.7931e+06	3.68093e+06	3428721	2.81183e+06	3.82541e+06	2873297	4.86002e+06	6.10394e+06	31298.1	250.019	75938.3	200026	2.05191e+06	235363	94854.1	1028023	4.34532e+06	3506525	0.000331812	1.15695e+06	1.60453e+06	507395	138.686	3.81703e+06	1.02487e+06	324092	26.8499	3.29921	1.72212	0.0114975	Up
A0A5C2G505		IGL c3506_light_IGKV3-20_IGKJ1 (Fragment)		15999.6	6215.1	33102	2769.18	35971.1	46761.2	250.019	882.837	44484	47430.7	250.019	250.019	250.019	250.019	250.019	7994.79	2566.22	250.019	30936	24587.6	0.0354758	6758.47	11429.5	3614.31	169.113	23386.6	20106.9	6358.35	85.9761	3.46034	1.79091	0.157099	Up
A0A5C2G543		IGL c3690_light_IGKV1-5_IGKJ4 (Fragment)		1.59185e+06	1.09991e+06	673529	2577784	2.55489e+06	692183	895648	1.75966e+06	854278	2.15171e+06	9786.72	214089	451669	91821.9	5508.42	333385	19565.2	250.019	279146	242009	3.55395e-05	164723	161616	51107.6	98.1141	1.48514e+06	749125	236894	50.4412	9.01602	3.17249	0.0033637	Up
A0A5C2G561		IGL c3566_light_IGKV4-1_IGKJ2 (Fragment)		246541	323590	238298	165204	190101	102405	107008	108356	329235	209744	135343	250.019	250.019	250.019	24270	21816.7	250.019	146843	177622	100630	0.000742435	60752.5	71268.9	22537.2	117.31	202048	84024.9	26571	41.5866	3.32576	1.73368	0.0167161	Up
A0A5C2G570		IGL c2717_light_IGKV4-1_IGKJ2 (Fragment)		46438960	26569268	23081234	1.34795e+06	34076880	11594255	28050076	21446290	30228656	27671244	2.59796e+06	1.04043e+06	834690	1.44517e+06	1.58937e+06	8488180	2795564	13728293	19559564	41791136	0.0125604	9.38704e+06	1.30358e+07	4.12228e+06	138.87	2.50505e+07	1.22187e+07	3.8639e+06	48.7764	2.66863	1.4161	0.091918	Up
A0A5C2G5B2		IGL c3616_light_IGLV2-14_IGLJ3 (Fragment)		76433.3	12924.8	98143.1	127196	6567.18	250.019	250.019	143539	91437.3	144834	56676.4	250.019	250.019	250.019	250.019	250.019	250.019	250.019	250.019	250.019	0.00456338	5892.66	17843.6	5642.64	302.811	70157.5	60169.8	19027.4	85.7639	11.9059	3.57361	0.0480743	Up
A0A5C2G5C2		IGH c189_heavy__IGHV3-33_IGHD6-19_IGHJ5 (Fragment)		1.70099e+06	1.17063e+06	2386767	1.58235e+06	1.22942e+06	2.22802e+06	1360431	1085161	1.22159e+06	1.25944e+06	250.019	250.019	250.019	250.019	1024502	250.019	250.019	250.019	250.019	3.87066e+06	0.0228443	489716	1.23078e+06	389207	251.325	1.52248e+06	455478	144035	29.9168	3.1089	1.6364	0.124117	Up
A0A5C2G5P7		IGL c2977_light_IGLV1-40_IGLJ3 (Fragment)		2.79592e+06	3.64496e+06	3.66629e+06	5.30649e+06	3850146	1.70319e+06	2.49507e+06	2.12569e+06	3.19192e+06	4677571	2.08855e+06	1.02728e+06	492454	739638	2.2239e+06	1043058	2469676	2.68665e+06	2.71659e+06	2.66507e+06	0.00329361	1.81529e+06	887432	280631	48.8866	3.34573e+06	1.12057e+06	354356	33.4927	1.84308	0.882121	0.0394868	Up
A0A5C2G613		IGL c3856_light_IGLV6-57_IGLJ2 (Fragment)		250.019	250.019	250.019	250.019	250.019	250.019	250.019	250.019	250.019	250.019	236191	135277	250.019	87573.3	68452	33397.9	319916	172813	250.019	250.019	0.00722908	105437	109847	34736.7	104.183	250.019	0	0	0	0.00237126	-8.72013	0.0649714	Down
A0A5C2G6B6		IGH c217_heavy__IGHV3-33_IGHD6-19_IGHJ4 (Fragment)		868011	1150671	491578	1.02946e+06	1.11048e+06	904616	1.00861e+06	1.1072e+06	847227	1.25912e+06	490900	184447	180194	392919	284142	261478	490450	919075	592453	114107	2.03976e-05	391017	242965	76832.2	62.1367	977696	215473	68138.6	22.0389	2.50039	1.32216	0.00232698	Up
A0A5C2G6E0		IGH c479_heavy__IGHV3-33_IGHD4-17_IGHJ4 (Fragment)		672399	757220	250.019	250.019	574534	250.019	483829	422339	250.019	830382	369387	250.019	5871.03	250.019	250.019	250.019	250.019	29736.3	286267	422752	0.0445462	111526	174373	55141.5	156.351	374170	342791	108400	91.6137	3.355	1.74631	0.178931	Up
A0A5C2G6E6		IGH c580_heavy__IGHV4-59B_IGHD6-19_IGHJ4 (Fragment)		250.019	23645.5	250.019	250.019	250.019	250.019	16151.2	250.019	250.019	250.019	16082.7	11075.6	13053.6	14919.5	41829.5	16823.9	32424.9	51103.8	250.019	250.019	0.0175264	19781.4	16856	5330.35	85.2118	4179.69	8470.7	2678.67	202.663	0.211294	-2.24267	0.110056	Down
A0A5C2G6G6		IGL c3247_light_IGKV1-9_IGKJ4 (Fragment)		343559	114653	130404	157901	185164	177897	99943.4	57292.2	375082	309780	24537.2	6283.66	250.019	5088.9	15235	250.019	61650.6	97907.4	100673	108248	0.000696186	42012.3	45324.2	14332.8	107.883	195167	109578	34651.7	56.1458	4.64549	2.21583	0.0162783	Up
A0A5C2G6J9		IGL c3415_light_IGKV1D-13_IGKJ2 (Fragment)		230055	218019	146998	123542	159351	197403	158956	213251	61917.1	162477	54133.9	9235.36	250.019	23714.8	250.019	250.019	16166.8	267115	176962	155376	0.0107399	70345.5	94963.6	30030.1	134.996	167197	50680.7	16026.7	30.312	2.3768	1.24902	0.0845779	Up
A0A5C2G6K5		IGL c3297_light_IGKV1D-39_IGKJ2 (Fragment)		771275	1.72187e+06	602625	240895	1.26921e+06	574886	1.04003e+06	661740	487494	1.09734e+06	275222	349115	3340.36	352375	249596	63665.3	168558	122070	557414	381135	0.000797671	252249	167050	52825.8	66.2241	846737	436403	138003	51.5393	3.35675	1.74707	0.0173819	Up
A0A5C2G6M0		IGL c2073_light_IGKV3-20_IGKJ3 (Fragment)		1.74721e+06	2.80839e+06	1.17619e+06	1934404	2.50426e+06	15118.3	381397	2.44611e+06	3.59821e+06	2.72858e+06	24094.7	46259.8	159153	37248.8	57269.1	148184	14937.3	255280	1.16684e+06	1.08652e+06	0.000466338	299579	442800	140026	147.807	1.93399e+06	1.12816e+06	356757	58.3336	6.45568	2.69057	0.0139707	Up
A0A5C2G6W2		IGH c322_heavy__IGHV3-7_IGHD3-9_IGHJ6 (Fragment)		250.019	250.019	250.019	250.019	250.019	305546	250.019	206563	250.019	117503	237095	144787	256338	273618	875673	643831	240517	501036	100843	196906	0.00389683	347064	247737	78341.5	71.3808	63136.1	110540	34955.8	175.082	0.181915	-2.45867	0.043343	Down
A0A5C2G6W9		IGH c332_heavy__IGHV4-61_IGHD3-10_IGHJ6 (Fragment)		250.019	250.019	250.019	33661.2	250.019	250.019	16787.3	250.019	250.019	250.019	98957.3	276436	170010	338598	227966	91660.5	83734.6	271611	250.019	250.019	0.000872739	155947	119126	37671	76.3889	5244.86	11256.1	3559.5	214.612	0.0336323	-4.89401	0.0178014	Down
A0A5C2G6X5		IGL c3447_light_IGKV4-1_IGKJ1 (Fragment)		86234.6	107752	250.019	320030	250.019	250.019	142618	237560	241891	250.019	250.019	250.019	250.019	250.019	250.019	10671	250.019	250.019	250.019	250.019	0.0079211	1292.11	3295.39	1042.1	255.039	113709	119003	37632.1	104.656	88.0019	6.45946	0.0682068	Up
A0A5C2G6Y1		IGL c138_light_IGLV3-25_IGLJ2 (Fragment)		83901.1	73137.9	97341.3	184730	163882	128057	55220.4	258270	28948.6	250.019	250.019	250.019	250.019	250.019	250.019	250.019	250.019	250.019	250.019	250.019	0.000384664	250.019	0	0	0	107374	77849.1	24618	72.5029	429.462	8.74639	0.0124303	Up
A0A5C2G758		IGL c2273_light_IGKV1-33_IGKJ2 (Fragment)		250.019	250.019	250.019	250.019	250.019	250.019	250.019	250.019	250.019	250.019	12038	24540	161759	7049.67	31139.2	14552	55380.4	16633.1	250.019	250.019	0.0499736	32359.2	48324	15281.4	149.336	250.019	0	0	0	0.00772638	-7.01599	0.191147	Down
A0A5C2G775		IGL c2293_light_IGKV3-20_IGKJ1 (Fragment)		1.15173e+06	693334	827060	789828	1387866	609999	924969	814939	1.12344e+06	870439	156244	1.06703e+06	341265	771823	206416	623215	282660	306726	339710	833433	0.00274804	492852	309318	97814.8	62.7608	919360	235834	74577.2	25.652	1.86539	0.899476	0.0354551	Up
A0A5C2G792		IGL c2313_light_IGKV3-15_IGKJ2 (Fragment)		300641	717506	403793	745391	215343	818225	288396	665251	327882	191628	9170.51	943948	13698.5	164568	13373.5	26819	173143	23813.9	85736.2	110758	0.0166858	156503	283730	89723.2	181.294	467406	241523	76376.3	51.6732	2.98656	1.57849	0.108261	Up
A0A5C2G7F8		IGL c368_light_IGLV2-11_IGLJ1 (Fragment)		532270	248514	635912	355991	378348	445819	544008	328980	361255	446424	235435	622654	250.019	509573	371914	96026.2	186144	344106	26436.4	125471	0.0309012	251801	207042	65472.3	82.2244	427752	116590	36869	27.2565	1.69877	0.764491	0.144647	Up
A0A5C2G7H1		IGL c424_light_IGKV1D-17_IGKJ1 (Fragment)		17314.9	18251.1	144248	250.019	48168.2	28667.4	16132.4	68961.5	124020	13196.7	2159.13	250.019	250.019	250.019	250.019	7140.53	250.019	250.019	49225.5	6319.15	0.0216555	6634.44	15198.5	4806.18	229.085	47921	49653.4	15701.8	103.615	7.22306	2.85261	0.121472	Up
A0A5C2G7I5		IGH c298_heavy__IGHV3-33_IGHD3-10_IGHJ4 (Fragment)		249024	584609	43988.8	221190	276973	414192	250.019	443164	182377	237274	76743	175451	31524.8	3491.99	11234.9	18628.6	112925	91446.8	328015	129978	0.0180886	97943.9	98784	31238.2	100.858	265304	177952	56273.3	67.0746	2.70874	1.43762	0.111637	Up
A0A5C2G7J2		IGH c582_heavy__IGHV4-59B_IGHD2-15_IGHJ1 (Fragment)		143486	59267.1	250.019	250.019	250.019	250.019	250.019	250.019	250.019	250.019	268877	217142	311192	250.019	240629	131378	250.019	39314.5	250.019	250.019	0.0313025	120953	127670	40372.9	105.553	20475.3	47033	14873.1	229.706	0.169283	-2.56249	0.145909	Down
A0A5C2G7L4		IGH c507_heavy__IGHV1-8_IGHD3-10_IGHJ5 (Fragment)		111543	147650	87286	459950	250.019	250.019	273474	324233	172777	250.019	250.019	250.019	250.019	250.019	250.019	250.019	250.019	250.019	39063	305435	0.046042	34649.8	95922.9	30333.5	276.835	157766	154302	48794.4	97.8038	4.55317	2.18687	0.182644	Up
A0A5C2G7Q4		IGL c3715_light_IGLV3-21_IGLJ2 (Fragment)		4205525	4.30527e+06	2.19229e+06	3.61142e+06	1.65623e+06	4.06454e+06	1.19004e+06	3.68191e+06	1.79353e+06	2.70632e+06	3.20816e+06	1.0084e+06	806540	1.74377e+06	1.82708e+06	1.06606e+06	1.22326e+06	3189616	1.4921e+06	581736	0.0115267	1.61467e+06	921245	291323	57.0546	2.94071e+06	1.17236e+06	370733	39.8666	1.82124	0.864923	0.0879947	Up
A0A5C2G7U8		IGL c548_light_IGKV4-1_IGKJ4 (Fragment)		1.24584e+06	1.63432e+06	1.1513e+06	986307	2696640	929888	1075964	873808	1.24279e+06	944124	787538	40449.2	203773	297734	551992	943845	436876	624657	631242	526623	0.000809866	504473	270696	85601.5	53.6591	1.2781e+06	545666	172555	42.6936	2.53353	1.34115	0.0173819	Up
A0A5C2G7W7		IGL c457_light_IGLV6-57_IGLJ2 (Fragment)		533856	493839	345125	2.66679e+06	1.49194e+06	762614	1.48646e+06	1.158e+06	598016	1.26768e+06	174039	273790	295659	148532	171948	73793.9	318161	171271	428500	286863	0.00136661	234256	104053	32904.5	44.4186	1.08043e+06	699925	221336	64.7819	4.61219	2.20545	0.0232567	Up
A0A5C2G810		IGL c507_light_IGKV1D-39_IGKJ1 (Fragment)		4792732	263880	8041263	45147476	39726812	44232596	8932830	6.53482e+06	5261001	12913176	876148	1.74716e+06	15369344	2.79538e+06	250.019	1.06712e+06	402133	250.019	3705227	5450790	0.0237802	3.14138e+06	4.6417e+06	1.46784e+06	147.76	1.75847e+07	1.79055e+07	5.66222e+06	101.825	5.59775	2.48485	0.125755	Up
A0A5C2G834		IGL c180_light_IGLV2-18_IGLJ1 (Fragment)		1.56678e+06	1.43452e+06	1.29703e+06	1713567	373820	1.43017e+06	978462	967736	1.73508e+06	1679734	285505	147111	293387	184139	1.34317e+06	184015	859653	277890	1.34002e+06	1.45575e+06	0.00654425	637064	551128	174282	86.5107	1.31769e+06	431949	136594	32.7807	2.06838	1.0485	0.0601319	Up
A0A5C2G842		IGL c3795_light_IGKV2D-28_IGKJ5 (Fragment)		250.019	250.019	250.019	250.019	250.019	250.019	250.019	250.019	250.019	250.019	451997	209871	137603	95678.4	130888	218112	68466.7	250.019	250.019	250.019	0.00790561	131337	138779	43885.6	105.666	250.019	0	0	0	0.00190365	-9.03701	0.0682068	Down
A0A5C2G851		IGL c547_light_IGKV4-1_IGKJ2 (Fragment)		567368	1094041	1.40766e+06	779987	1.33396e+06	969627	880292	445322	844549	901154	171696	240709	729798	53486	345039	234129	155063	760972	567645	178511	0.000197319	343705	252242	79765.9	73.3892	922396	301620	95380.5	32.6996	2.68369	1.42422	0.00883958	Up
A0A5C2G8A1		IGL c3855_light_IGKV1D-39_IGKJ1 (Fragment)		64638.1	336935	611258	1.32891e+06	376706	111775	1450030	217646	234555	57172.9	250.019	173232	10515.5	46903.5	240534	66191	47109.7	54933.9	156132	306894	0.0374068	110269	103689	32789.2	94.032	478963	508367	160760	106.139	4.34356	2.11888	0.162191	Up
A0A5C2G8A6		IGH c164_heavy__IGHV3-11_IGHD1-26_IGHJ3 (Fragment)		850723	10490	1.05655e+06	10604.4	339347	637128	624599	733446	927804	364682	9553.54	40305.3	298971	498395	521286	250.019	250.019	63249.9	702430	348225	0.0439563	248292	261070	82557.6	105.147	555538	364692	115326	65.6467	2.23744	1.16185	0.178054	Up
A0A5C2G8C8		IGL c3885_light_IGLV3-21_IGLJ2 (Fragment)		185751	153676	250.019	250.019	250.019	41412.8	250.019	259980	64231.7	13319.2	250.019	250.019	250.019	250.019	250.019	250.019	250.019	250.019	64711.8	250.019	0.0463844	6696.19	20384.6	6446.18	304.421	71937	94268	29810.2	131.042	10.743	3.42532	0.183201	Up
A0A5C2G8G0		IGH + IGL c100_heavy_IGHV3-33_IGHD3-16_IGHJ3 (Fragment)		1.20962e+06	636248	664025	1.15354e+06	1.69439e+06	636314	1086675	601838	1.3281e+06	1.37384e+06	5134.92	250.019	250.019	250.019	6174.95	250.019	250.019	250.019	1.04573e+06	1.57561e+06	0.00211998	263415	565911	178957	214.836	1.03846e+06	383813	121372	36.9599	3.94229	1.97903	0.0313768	Up
A0A5C2G8G7		IGL c320_light_IGKV1-5_IGKJ4 (Fragment)		250.019	250.019	250.019	250.019	250.019	525713	545786	250.019	250.019	250.019	339535	315678	294827	186825	705151	381017	910308	1.01959e+06	250.019	215679	0.0180468	436886	330862	104628	75.7318	107350	225836	71415.7	210.374	0.245716	-2.02494	0.111619	Down
A0A5C2G8H5		IGL c330_light_IGKV1D-33_IGKJ2 (Fragment)		5.05138e+06	1.89965e+06	1.84386e+06	3.18957e+06	2.35129e+06	2.72983e+06	2.35301e+06	1923358	3348779	2617809	1.41848e+06	1.48257e+06	1.55019e+06	1.00461e+06	1.80735e+06	790581	2162925	3248027	1461488	2.50027e+06	0.0187351	1.74265e+06	727317	229998	41.7363	2.73085e+06	966461	305622	35.3904	1.56707	0.64807	0.113473	Up
A0A5C2G8M7		IGL c165_light_IGKV1-9_IGKJ5 (Fragment)		1.52058e+06	201821	245095	189747	943531	111361	411600	395452	573141	199733	276416	250.019	15518.9	130595	369152	79769.1	302162	104962	28571	122449	0.032663	142984	129108	40827.7	90.2955	479206	440886	139421	92.0035	3.35146	1.74479	0.149584	Up
A0A5C2G8N0		IGH c284_heavy__IGHV1-69_IGHD4-4_IGHJ4 (Fragment)		381363	917838	591036	75636.8	250.019	250.019	122145	212549	300408	250.019	250.019	250.019	250.019	250.019	250.019	250.019	250.019	250.019	111812	79789.2	0.0220593	19360.2	40988.7	12961.8	211.717	260173	301174	95239.7	115.759	13.4385	3.7483	0.12224	Up
A0A5C2G8R2		IGH c314_heavy__IGHV3-30_IGHD6-6_IGHJ6 (Fragment)		3491943	3062984	2.51048e+06	435370	1.54243e+06	2406931	3133873	1.29477e+06	1.73655e+06	1.61632e+06	761171	250.019	628082	1.86868e+06	250.019	250.019	250.019	290282	843735	1.00294e+06	0.000343443	539590	610675	193112	113.174	2.12316e+06	959594	303450	45.1964	3.93478	1.97628	0.0117588	Up
A0A5C2G8T8		IGH + IGL c93_heavy_IGHV4-39_IGHD3-3_IGHJ4 (Fragment)		1.25247e+06	969021	1.24392e+06	1.13783e+06	1.39425e+06	1131677	715715	800318	965055	1.00639e+06	1.88161e+06	3.10071e+06	2.41391e+06	2.69394e+06	1.73737e+06	3.56633e+06	1.90829e+06	3211519	980820	1.30173e+06	0.000376949	2.27962e+06	857737	271240	37.6263	1.06166e+06	210791	66658	19.8548	0.46572	-1.10247	0.0124303	Down
A0A5C2G8V8		IGL c4147_light_IGLV9-49_IGLJ2 (Fragment)		14610.2	250.019	250.019	21042.3	250.019	250.019	13543	8945.55	14773.2	12069.8	853.473	250.019	250.019	250.019	250.019	250.019	250.019	250.019	250.019	250.019	0.00342209	310.365	190.829	60.3453	61.4853	8598.41	7778.33	2459.72	90.4625	27.7042	4.79203	0.0405018	Up
A0A5C2G8X3		IGH c384_heavy__IGHV3-21_IGHD2-15_IGHJ4 (Fragment)		191177	102551	52121.9	250.019	129410	250.019	18820.9	70735.4	49421.6	250.019	250.019	250.019	250.019	250.019	18102.8	250.019	250.019	12488.2	17162.8	250.019	0.0121613	4950.4	7699.95	2434.94	155.542	61498.8	63690.5	20140.7	103.564	12.423	3.63494	0.090144	Up
A0A5C2G9E4		IGL c435_light_IGLV1-51_IGLJ2 (Fragment)		250.019	250.019	250.019	250.019	250.019	250.019	250.019	250.019	250.019	201234	183947	36338.6	250.019	84860.2	697111	150585	1.11327e+06	646392	250.019	250.019	0.0431285	291326	388658	122904	133.41	20348.4	63556.8	20098.4	312.342	0.0698477	-3.83964	0.175442	Down
A0A5C2G9I5		IGL c516_light_IGKV1D-39_IGKJ4 (Fragment)		722815	399922	379045	1.50466e+06	817863	1.10109e+06	349602	1.998e+06	1.01704e+06	806932	1137619	265404	329882	254152	277960	21597.5	760029	426966	563912	488959	0.0298513	452648	313383	99100.4	69.2332	909697	526586	166521	57.8858	2.00972	1.007	0.143087	Up
A0A5C2G9I6		IGL c442_light_IGKV1D-39_IGKJ1 (Fragment)		1.69271e+06	578892	1.50859e+06	2.16609e+06	1.28256e+06	931856	821255	1.63215e+06	846828	672207	859761	252805	138943	124384	901473	1.25863e+06	560138	1.08485e+06	730077	1.36451e+06	0.0392031	727557	450536	142472	61.9245	1.21331e+06	523614	165581	43.1557	1.66766	0.737821	0.166243	Up
A0A5C2G9J5		IGL c495_light_IGKV3-20_IGKJ1 (Fragment)		787243	139487	79921.2	1.77815e+06	1478843	19990.9	860921	467089	385381	84598.3	73686.3	199287	507932	104214	135033	17764.4	45160.5	55158.9	50369.3	100688	0.0275545	128929	143015	45225.3	110.925	608162	615648	194685	101.231	4.71702	2.23788	0.136373	Up
A0A5C2G9J9		IGL c536_light_IGLV2-14_IGLJ2 (Fragment)		21549.1	671085	250.019	706779	754901	342303	937082	611157	906272	406874	250.019	49249.9	250.019	250.019	31483.7	44093	44735.3	826880	365353	398932	0.0168513	176148	273545	86502.6	155.293	535825	334137	105663	62.3593	3.04191	1.60498	0.108261	Up
A0A5C2G9L9		IGL c556_light_IGKV3-20_IGKJ3 (Fragment)		6029383	3.24539e+06	6503156	4.82443e+06	1.05972e+06	600843	5238493	1.76825e+06	7115759	5.68594e+06	229109	250.019	20968.4	128239	165551	34531.6	54723.3	724567	1.27042e+06	670423	7.52229e-05	329878	421795	133383	127.864	4.20714e+06	2.36804e+06	748841	56.2863	12.7536	3.67283	0.00528225	Up
A0A5C2G9P8		IGL c3163_light_IGKV3-11_IGKJ5 (Fragment)		5162751	6439834	2.92424e+06	4.584e+06	1.06175e+06	5.2688e+06	7344125	2.33932e+06	1.75176e+06	2.40531e+06	2.90042e+06	2.17487e+06	2.96385e+06	3.79866e+06	1.24715e+06	640603	1.30167e+06	1355347	2.12894e+06	2.07812e+06	0.0206397	2.05896e+06	960987	303891	46.6734	3.92819e+06	2.12219e+06	671097	54.0248	1.90785	0.931947	0.118983	Up
A0A5C2G9Q6		IGH + IGL c42_light_IGKV3-15_IGKJ1 (Fragment)		64161.5	144770	57677.2	32653	102431	108502	180160	219087	63973.9	27249	175296	1.21595e+06	16101.9	152109	90173.4	1.29949e+06	1786723	1.29281e+06	96969.4	147810	0.0256075	627343	682223	215738	108.748	100067	64024.1	20246.2	63.9816	0.159509	-2.64829	0.130349	Down
A0A5C2G9Y7		IGH + IGL c28_light_IGKV1-12_IGKJ1 (Fragment)		1606589	1.26962e+06	980578	1.30048e+06	969592	502592	927737	525461	1.10424e+06	985303	24747.3	250.019	250.019	204531	250.019	13575.3	60343.1	37487.2	1.05919e+06	800461	0.000105903	220108	383814	121373	174.375	1.01722e+06	336349	106363	33.0655	4.62145	2.20835	0.00673584	Up
A0A5C2GA13		IGH + IGL c563_heavy_IGHV4-59B_IGHD5-12_IGHJ4 (Fragment)		117037	524638	1.33999e+06	365521	824227	69742.6	300404	397763	641678	417821	4494850	3.45632e+06	3.49142e+06	6.87984e+06	6612691	5622749	250.019	6976539	302429	591745	0.00131419	3.84288e+06	2.75784e+06	872106	71.7649	499882	370929	117298	74.2033	0.13008	-2.94253	0.0228376	Down
A0A5C2GA79		IGL c302_light_IGKV3-20_IGKJ1 (Fragment)		57776.7	3164592	63272.3	3.12427e+06	5.1038e+06	2.84966e+06	3.17881e+06	2.45835e+06	3636831	101149	250.019	114451	110453	250.019	121496	104024	250.019	16211	2.71107e+06	4.10142e+06	0.0333266	727987	1.45002e+06	458536	199.182	2.37385e+06	1.7316e+06	547579	72.9446	3.26084	1.70524	0.151872	Up
A0A5C2GA91		IGL c3373_light_IGKV4-1_IGKJ1 (Fragment)		2.06884e+06	1.22786e+06	1387151	1461612	1.71968e+06	1.03445e+06	1.21296e+06	1265319	2.62785e+06	1.78584e+06	451518	218463	250.019	121401	406342	208383	154895	508779	800956	1.04959e+06	4.74453e-06	392058	327244	103483	83.4682	1.57916e+06	483666	152949	30.6281	4.02787	2.01002	0.000985405	Up
A0A5C2GA96		IGH c195_heavy__IGHV4-31_IGHD3-10_IGHJ2 (Fragment)		250.019	298560	202908	51214.2	967467	250.019	858599	448645	1285493	78878.1	250.019	34372.9	250.019	250.019	70601.6	250.019	250.019	250.019	157228	333229	0.0272648	59693.2	108677	34366.7	182.059	419226	460508	145625	109.847	7.02302	2.81209	0.135929	Up
A0A5C2GAC3		IGH + IGL c176_heavy_IGHV3-15_IGHD7-27_IGHJ4 (Fragment)		1.03021e+06	56604.8	2.48481e+06	3.9273e+06	3.42818e+06	2.36574e+06	2.15006e+06	3068451	2.46179e+06	2462724	55807.9	527629	275436	242407	1.08376e+06	250.019	235812	379526	3.9568e+06	689352	0.00590712	744678	1.17267e+06	370830	157.473	2.34359e+06	1.11809e+06	353573	47.7087	3.14712	1.65403	0.0566296	Up
A0A5C2GAF5		IGH + IGL c75_light_IGKV3-15_IGKJ3 (Fragment)		148969	799968	250.019	180443	977881	141854	831708	585348	396438	551976	94791.7	9437.24	250.019	37361.8	7833.05	250.019	113230	15673.4	352557	693552	0.0198474	132494	224441	70974.5	169.398	461483	339545	107373	73.5768	3.48306	1.80036	0.117693	Up
A0A5C2GAI5		IGH + IGL c216_light_IGKV3-20_IGKJ2 (Fragment)		250.019	23530	250.019	35433.6	153276	250.019	233147	2733.25	599319	250.019	4570646	1.95883e+06	1.05914e+06	1.56145e+06	2.95015e+06	1.84755e+06	4328117	5.75958e+06	250.019	250.019	0.00166338	2.4036e+06	1.95894e+06	619473	81.5005	104844	191174	60454.6	182.342	0.0436196	-4.51888	0.0265771	Down
A0A5C2GAM2		IGH + IGL c256_light_IGKV1-5_IGKJ1 (Fragment)		330152	569146	255737	240608	378980	646184	523546	389448	649827	201634	551493	62292	887066	9783.21	17954.4	137178	94455.7	39355.8	34009.8	64997.8	0.0459597	189859	292411	92468.4	154.015	418526	168147	53172.7	40.176	2.20441	1.14039	0.182569	Up
A0A5C2GAM8		IGL c482_light_IGKV3-20_IGKJ4 (Fragment)		1.32299e+06	2.06727e+06	240062	1.51535e+06	1.22232e+06	2.20051e+06	1.63881e+06	388461	6262565	459187	238496	99817.5	59933.9	469470	83660.1	405416	363567	867334	1.26579e+06	153389	0.0290902	400687	389714	123238	97.2614	1.73175e+06	1.73178e+06	547638	100.002	4.32196	2.11169	0.140378	Up
A0A5C2GAQ7		IGH c305_heavy__IGHV4-59B_IGHD7-27_IGHJ4 (Fragment)		250.019	366054	250.019	881855	564426	830219	517486	1.09656e+06	555488	480950	262522	250.019	46790.3	250.019	356375	250.019	296277	652969	383670	250.019	0.0232306	199960	225984	71462.6	113.015	529354	353941	111926	66.8628	2.64729	1.40452	0.125043	Up
A0A5C2GAS2		IGH + IGL c271_heavy_IGHV4-59B_IGHD2-15_IGHJ6 (Fragment)		631125	102588	299584	147220	1.27508e+06	182609	1.04312e+06	520539	308025	517822	159608	44061.9	57477.8	91760.1	123957	250.019	35509.4	399293	339866	323407	0.0172944	157519	144214	45604.5	91.5535	502771	390687	123546	77.7068	3.19181	1.67438	0.109533	Up
A0A5C2GAT8		IGL c542_light_IGKV1-5_IGKJ1 (Fragment)		1306643	1.17601e+06	1.89232e+06	2.00637e+06	1.56745e+06	999922	1.12049e+06	1.2526e+06	977590	1.48154e+06	827126	537147	299590	486284	857569	607980	347116	492767	603368	89649.4	4.79683e-06	514860	232988	73677.1	45.2526	1.37809e+06	355463	112407	25.7939	2.67664	1.42042	0.000985405	Up
A0A5C2GAX2		IGH + IGL c331_heavy_IGHV4-39_IGHD1-1_IGHJ6 (Fragment)		105837	2284632	250.019	569418	1.47288e+06	976735	520165	618492	1.15728e+06	639621	7.04283e+06	5315113	5.39919e+06	10538501	1.22254e+06	8705779	8503542	10838028	422564	1.24716e+06	0.000704425	5.92352e+06	3.88693e+06	1.22915e+06	65.6185	834531	676220	213840	81.03	0.140884	-2.82742	0.0163381	Down
A0A5C2GAY3		IGL c582_light_IGKV3-11_IGKJ4 (Fragment)		212793	633877	473648	173270	167374	139905	692408	991501	138087	417368	83652.2	104925	115949	74618	184124	94912.9	45914.3	337627	383355	139586	0.0228103	156466	114337	36156.6	73.0747	404023	292964	92643.5	72.5118	2.58217	1.36859	0.124117	Up
A0A5C2GB05		IGH + IGL c386_light_IGLV3-19_IGLJ1 (Fragment)		21298.6	250.019	5471.95	250.019	9927.07	18058.2	250.019	250.019	6212.17	1900.53	250.019	250.019	250.019	250.019	250.019	250.019	250.019	250.019	2312.83	6196.34	0.0491852	1050.93	1920.63	607.356	182.755	6386.85	7765.66	2455.72	121.588	6.07732	2.60344	0.18962	Up
A0A5C2GB27		IGH + IGL c285_light_IGKV1-5_IGKJ2 (Fragment)		1.50764e+06	1.14578e+06	871551	2.24659e+06	2.55722e+06	1.98541e+06	1.82455e+06	1.44227e+06	2.70379e+06	2.61927e+06	141451	380436	508926	349591	478780	716042	320411	826409	1.7603e+06	2370149	0.00191411	785249	716753	226657	91.2771	1.89041e+06	642701	203240	33.998	2.4074	1.26747	0.029667	Up
A0A5C2GB45		IGH + IGL c305_light_IGKV2-28_IGKJ1 (Fragment)		1182718	833109	590623	439058	555783	805521	1.1208e+06	381534	823579	852860	2.04789e+06	1.32149e+06	2.58822e+06	4646232	4083511	4206552	3.49044e+06	5.80707e+06	2370815	726067	0.000199782	3.12883e+06	1.59004e+06	502816	50.8191	758558	267823	84693	35.3068	0.242442	-2.04429	0.00883958	Down
A0A5C2GB55		IGL c3613_light_IGLV3-21_IGLJ1 (Fragment)		250.019	250.019	250.019	250.019	250.019	250.019	250.019	250.019	250.019	250.019	86944.9	55739.9	72858.2	71625.9	86431.6	250.019	192568	267617	250.019	250.019	0.00711852	83453.6	86687.2	27412.9	103.875	250.019	0	0	0	0.00299591	-8.38279	0.0643801	Down
A0A5C2GB84		IGH + IGL c462_light_IGLV1-44_IGLJ3 (Fragment)		454647	333464	403825	515386	250.019	424717	136607	182200	305380	420854	250.019	250.019	250.019	250.019	225156	250.019	250.019	225083	250.019	250.019	0.000239523	45223.9	94813.2	29982.6	209.653	317733	163189	51604.8	51.3603	7.02578	2.81266	0.00965059	Up
A0A5C2GBA0		IGH c603_heavy__IGHV3-30_IGHD1-7_IGHJ4 (Fragment)		250.019	250.019	250.019	250.019	250.019	250.019	250.019	250.019	250.019	250.019	250.019	52606.2	178182	250.019	12689	250.019	130180	89541.4	250.019	250.019	0.0374917	46444.9	65039.2	20567.2	140.035	250.019	0	0	0	0.00538314	-7.53734	0.162191	Down
A0A5C2GBE0		IGH + IGL c526_light_IGLV3-1_IGLJ1 (Fragment)		1.25336e+06	6316.53	5864.79	1.56177e+06	1.65597e+06	3.61179e+06	2012196	2.41827e+06	974746	664119	118057	250.019	250.019	250.019	211775	250.019	287783	259074	1.31209e+06	1.42535e+06	0.0144637	361513	543140	171756	150.241	1.41644e+06	1.10667e+06	349960	78.1304	3.91809	1.97015	0.10072	Up
A0A5C2GBI3		IGH + IGL c392_heavy_IGHV1-18_IGHD3-9_IGHJ6 (Fragment)		356234	324229	333010	470735	282543	409940	261208	664634	441118	397113	48004.7	250.019	11448.3	134412	102453	43676	66697.3	257042	250.019	49205.9	9.05332e-07	71343.9	78136	24708.8	109.52	394076	116278	36770.4	29.5065	5.52362	2.46561	0.0007244	Up
A0A5C2GBK2		IGL c13_light_IGKV4-1_IGKJ2 (Fragment)		1.48831e+06	2423789	1.05654e+06	1.97272e+06	1.38026e+06	932592	1.63974e+06	2078204	1228487	2.59739e+06	1.73928e+06	720574	1.10964e+06	842232	1.13603e+06	687166	948215	923791	679094	534273	0.00225481	932030	343200	108529	36.8228	1.6798e+06	569450	180076	33.8998	1.80231	0.849845	0.0321031	Up
A0A5C2GBK7		IGL c23_light_IGKV3-15_IGKJ4 (Fragment)		7.47443e+06	5431264	3.823e+06	8390513	6.57439e+06	5.47914e+06	2.33918e+06	5779175	6.89856e+06	5631123	1.20963e+06	876456	945932	116575	1.92106e+06	3.47463e+06	1.47741e+06	291458	6.48952e+06	4.69495e+06	0.000511436	2.14976e+06	2.08467e+06	659231	96.9721	5.78208e+06	1.74711e+06	552484	30.2159	2.68963	1.42741	0.0142805	Up
A0A5C2GBN1		IGH + IGL c28_light_IGKV3-11_IGKJ4 (Fragment)		45602.1	22494.7	250.019	243714	8156.26	250.019	32119.3	298999	168624	138573	4161.83	15341.3	250.019	7225.85	25936.9	23965.7	250.019	250.019	7892.75	250.019	0.02192	8552.44	9905.5	3132.39	115.821	95878.2	109641	34671.6	114.355	11.2106	3.48679	0.121788	Up
A0A5C2GBR3		IGH + IGL c492_heavy_IGHV3-20_IGHD3-22_IGHJ4 (Fragment)		27896	52800.8	18082.9	98471.7	250.019	39522.7	250.019	250.019	24360.5	20816.1	250.019	250.019	250.019	250.019	250.019	250.019	250.019	250.019	20393.4	11733.5	0.0205546	3412.71	6972.97	2205.05	204.324	28270.1	30160.3	9537.51	106.686	8.28377	3.05029	0.118983	Up
A0A5C2GBU1		IGH + IGL c108_light_IGKV2-28_IGKJ2 (Fragment)		250.019	29152.2	23176.7	35863	250.019	12587.3	66444.1	29745.2	46786.3	10021.6	8621.97	6114.31	17901	1045.86	9044.69	2782.9	549.966	250.019	17414.4	250.019	0.0137376	6397.52	6808.67	2153.09	106.427	25427.6	20963.1	6629.11	82.4422	3.97461	1.99081	0.0977952	Up
A0A5C2GBW3		IGH + IGL c552_heavy_IGHV4-59_IGHD3-3_IGHJ5 (Fragment)		250.019	335259	271965	281932	250.019	250.019	102585	234276	456043	250.019	496105	202100	343293	509463	336587	671300	202293	441422	571426	250.019	0.0216094	377424	201692	63780.6	53.4391	168306	168643	53329.6	100.2	0.445934	-1.1651	0.121472	Down
A0A5C2GBX6		IGH + IGL c605_light_IGKV2-28_IGKJ2 (Fragment)		10296.6	250.019	250.019	4143.51	250.019	250.019	1637.35	250.019	250.019	250.019	14413.6	6859.41	6721.98	3517.54	9825.93	10915	7124.16	3327.37	10562.2	250.019	0.00393813	7351.72	4229.75	1337.56	57.5342	1782.76	3240.81	1024.83	181.786	0.242496	-2.04397	0.0435183	Down
A0A5C2GBX8		IGH + IGL c572_heavy_IGHV1-69_IGHD6-13_IGHJ6 (Fragment)		40107.2	13153.7	161429	161038	197115	89357.5	140519	112371	207639	152158	250.019	250.019	250.019	8756.57	14037.3	250.019	250.019	250.019	158684	268150	0.0324662	45112.8	92500.7	29251.3	205.043	127489	63873.4	20198.5	50.1012	2.826	1.49876	0.149159	Up
A0A5C2GBZ2		IGH + IGL c168_light_IGKV3-11_IGKJ2 (Fragment)		272511	283991	306266	309092	357422	365385	282642	304248	501065	210591	948786	232017	266249	691348	1.20943e+06	603667	693875	833723	570543	387877	0.00436138	643751	305209	96515.4	47.411	319321	77254	24429.9	24.1932	0.496032	-1.01149	0.0468035	Down
A0A5C2GBZ9		IGH + IGL c178_light_IGKV3-15_IGKJ5 (Fragment)		250.019	5239.35	1817.68	250.019	250.019	1567.66	1708.9	2019.22	1342.9	971.622	26499	7316.18	24429.9	34675.8	73838.3	29484.4	117993	56791.5	250.019	18768.1	0.00347964	39004.6	35217.8	11136.8	90.2915	1541.74	1467.24	463.984	95.1682	0.0395271	-4.66101	0.0408468	Down
A0A5C2GC03		IGL c221_light_IGLV3-19_IGLJ3 (Fragment)		248388	284780	99975	454029	270826	185494	208008	258137	276349	226276	1.35194e+06	248927	1.0957e+06	1.29848e+06	855873	769.114	741448	1.05566e+06	121103	93177.9	0.0188706	686308	525586	166205	76.5816	251226	90070.3	28482.7	35.8523	0.366055	-1.44987	0.113777	Down
A0A5C2GC11		IGL c231_light_IGKV1-5_IGKJ3 (Fragment)		250.019	29275	250.019	17601.2	28561.2	250.019	250.019	7311.08	17513.7	250.019	250.019	250.019	250.019	250.019	250.019	250.019	250.019	250.019	250.019	8648.92	0.0324665	1089.91	2655.96	839.89	243.687	10151.2	12076.6	3818.94	118.967	9.31383	3.21937	0.149159	Up
A0A5C2GC12		IGH + IGL c308_heavy_IGHV3-7_IGHD6-19_IGHJ4 (Fragment)		1.04358e+06	444356	199075	533903	250.019	250.019	250.019	250.019	250.019	250.019	2.37368e+06	250.019	981584	1841664	2.48453e+06	1.88035e+06	1.9346e+06	2.83452e+06	250.019	250.019	0.00390328	1.43317e+06	1.10231e+06	348579	76.9139	222241	352339	111419	158.539	0.15507	-2.68901	0.043343	Down
A0A5C2GC35		IGH + IGL c4_light_IGKV1-39_IGKJ2 (Fragment)		1.90122e+06	1.56162e+06	1.11962e+06	1.64033e+06	1.19433e+06	591289	1.07169e+06	631146	1.32444e+06	1163522	29073.3	250.019	19944	250.019	15920.4	350687	250.019	30826.2	1.27444e+06	1.01325e+06	0.000160328	273489	474732	150123	173.584	1.21992e+06	414500	131077	33.9776	4.46059	2.15723	0.00838369	Up
A0A5C2GCC0		IGL c3497_light_IGLV3-19_IGLJ2 (Fragment)		203022	236522	373857	250.019	233503	8616.29	222645	151997	188067	232540	250.019	250.019	250.019	250.019	250.019	250.019	250.019	250.019	250.019	250.019	5.27113e-05	250.019	0	0	0	185102	111065	35121.7	60.0019	740.351	9.53206	0.00421105	Up
A0A5C2GCD3		IGH + IGL c114_light_IGKV3-15_IGKJ4 (Fragment)		1.15848e+06	867124	554292	801504	1.13287e+06	762466	925974	631346	1.56121e+06	632731	232700	250.019	14112.2	49934.1	435023	57215.8	152013	292173	404835	761144	4.29826e-05	239940	241604	76401.9	100.694	902800	307617	97277	34.0736	3.76261	1.91173	0.00361336	Up
A0A5C2GCD9		IGL c253_light_IGKV3-11_IGKJ3 (Fragment)		124818	281121	428658	416133	255189	261576	20077.3	409377	655797	401483	37611.8	6183.99	108578	122265	46440.4	31248	21854	570537	40554.2	120212	0.0122753	110548	167066	52830.9	151.125	325423	178050	56304.4	54.7135	2.94372	1.55764	0.0907551	Up
A0A5C2GCE0		IGH + IGL c263_light_IGKV1-27_IGKJ3 (Fragment)		1.22108e+06	931835	567228	615615	504166	416059	760110	835383	448377	596499	6491.33	92633.1	75917.6	50935.8	32414.2	69628.1	109385	30732.3	318105	434174	6.67721e-06	122042	140058	44290.1	114.762	689636	250309	79154.8	36.2959	5.65082	2.49846	0.001161	Up
A0A5C2GCJ9		IGL c313_light_IGKV1D-17_IGKJ3 (Fragment)		4.36529e+06	4.05028e+06	13354212	5343787	5118827	4.00104e+06	11154684	4.00231e+06	6740081	4658958	1.8252e+06	1.05516e+06	1.42433e+06	2.22999e+06	2.63274e+06	1.23387e+06	1.27124e+06	2.2972e+06	2.83198e+06	5023761	0.00163803	2.18255e+06	1.17456e+06	371429	53.8161	6.27895e+06	3.29799e+06	1.04292e+06	52.5246	2.87689	1.52451	0.0265771	Up
A0A5C2GCL3		IGH + IGL c333_light_IGKV4-1_IGKJ4 (Fragment)		2.80884e+06	3.56908e+06	2700968	1379071	4.09421e+06	708489	5.38659e+06	2.56868e+06	3.56038e+06	2.99015e+06	1.0525e+06	807387	176719	108174	721941	167389	489979	1.20328e+06	1.90286e+06	1.73877e+06	0.000217788	836900	639438	202208	76.4055	2.97665e+06	1.32145e+06	417879	44.3939	3.55675	1.83056	0.00907767	Up
A0A5C2GCP8		IGH + IGL c518_heavy_IGHV2-70_IGHD1-26_IGHJ6 (Fragment)		283950	250.019	281147	247940	88402.4	226090	250.019	250.019	68044	250.019	250.019	250.019	250.019	250.019	250.019	250.019	250.019	250.019	250.019	250.019	0.00750149	250.019	0	0	0	119657	125401	39655.2	104.8	478.592	8.90265	0.0663824	Up
A0A5C2GCU8		IGH + IGL c568_heavy_IGHV3-23_IGHD2-21_IGHJ3 (Fragment)		1143102	1.15225e+06	1.14454e+06	842368	898784	93721.7	121502	20424.9	163259	135363	250.019	250.019	250.019	250.019	250.019	250.019	250.019	3570.57	997488	71112.1	0.0231884	107392	313532	99147.6	291.951	571532	501574	158612	87.7597	5.32191	2.41194	0.125043	Up
A0A5C2GCW0		IGH + IGL c528_light_IGKV2D-28_IGKJ5 (Fragment)		250.019	39174.5	250.019	7496.2	60771.3	250.019	250.019	250.019	250.019	250.019	6112.46	1929.99	136887	103538	366470	113311	297967	250.019	20597.9	250.019	0.0392487	104731	131724	41654.8	125.773	10919.2	21323.2	6743	195.282	0.104259	-3.26175	0.166243	Down
A0A5C2GCW6		IGH + IGL c284_light_IGLV3-1_IGLJ1 (Fragment)		250.019	250.019	64703	250.019	250.019	250.019	250.019	85770.5	250.019	330361	853839	467347	2.27514e+06	469509	227937	282488	1.08468e+06	596899	166842	250.019	0.0114229	642494	659006	208396	102.57	48258.5	104026	32896	215.561	0.0751112	-3.73483	0.0878405	Down
A0A5C2GCY6		IGH + IGL c453_light_IGKV1D-39_IGKJ1 (Fragment)		243889	250.019	1458932	274197	80004.8	341999	250.019	379965	135651	629913	1.00376e+06	1.98622e+06	2.63218e+06	2.73017e+06	670261	3001449	928538	250.019	1085428	548400	0.00641711	1.45867e+06	1.04652e+06	330938	71.7448	354505	433249	137005	122.212	0.243034	-2.04077	0.0591526	Down
A0A5C2GCZ1		IG c698_heavy_IGHV1-18_IGHD3-16_IGHJ5 (Fragment)		257912	674239	668032	890321	517325	477083	491518	356435	363810	904317	250.019	656882	103757	462861	250.019	159773	250.019	250.019	911471	320521	0.0262727	261626	321638	101711	122.938	560099	220343	69678.6	39.34	2.14084	1.09817	0.132562	Up
A0A5C2GD14		IG c725_heavy_IGHV1-18_IGHD6-6_IGHJ4 (Fragment)		250.019	250.019	19013.8	307365	94600	95482.4	57566.8	438033	139875	75911	250.019	679533	789959	9059.43	73752.3	1.3687e+06	1295042	1.4843e+06	155820	60533.1	0.02981	591695	612088	193559	103.446	122835	142412	45034.7	115.938	0.207598	-2.26814	0.143087	Down
A0A5C2GD47		IGH + IGL c618_light_IGLV1-36_IGLJ2 (Fragment)		250.019	26710.5	250.019	250.019	250.019	250.019	250.019	250.019	250.019	250.019	57430.5	67919.6	250.019	38642.9	20141	250.019	250.019	250.019	77483.4	250.019	0.0355442	26286.7	31454.2	9946.7	119.658	2896.06	8367.52	2646.04	288.928	0.110172	-3.18217	0.157099	Down
A0A5C2GDA1		IG c674_heavy_IGHV1-69_IGHD3-22_IGHJ4 (Fragment)		250.019	250.019	250.019	250.019	250.019	250.019	142148	110382	250.019	250.019	865651	1.79658e+06	1.82358e+06	2.82151e+06	550681	2494715	633539	1.23923e+06	250.019	250.019	0.00123417	1.2226e+06	987694	312336	80.7864	25453	53657.6	16968	210.81	0.0208188	-5.58597	0.0219104	Down
A0A5C2GDA7		IGH + IGL c23_light_IGKV1-5_IGKJ1 (Fragment)		3.12807e+06	2.42328e+06	1.97477e+06	2641591	2010341	1.02026e+06	1.76756e+06	1.07564e+06	2204179	1.95928e+06	25614.1	250.019	250.019	6113.34	96123.8	9089.27	46693	83346.6	2.10655e+06	1.77418e+06	0.000114762	414821	808541	255683	194.913	2.0205e+06	647354	204711	32.0394	4.87077	2.28415	0.00673584	Up
A0A5C2GDB6		IGH + IGL c464_light_IGKV3-15_IGKJ1 (Fragment)		1.02648e+06	480873	735180	1.09047e+06	780972	885231	969660	1.25144e+06	2.04917e+06	1087725	64938.5	250.019	250.019	250.019	367194	250.019	123659	539837	882057	930403	0.000522694	290909	371657	117528	127.757	1.03572e+06	417597	132056	40.3195	3.56029	1.83199	0.0143168	Up
A0A5C2GDG1		IGH + IGL c623_light_IGKV4-1_IGKJ4 (Fragment)		517514	250.019	612991	570778	250.019	250.019	197371	250.019	699976	855688	250.019	250.019	18870.6	250.019	250.019	250.019	250.019	250.019	250.019	250.019	0.00496793	2112.07	5888.33	1862.05	278.794	345532	339373	107319	98.2176	163.599	7.35402	0.0508	Up
A0A5C2GDM9		IGH c71_heavy__IGHV3-7_IGHD4-23_IGHJ3 (Fragment)		632429	551686	991656	320284	995380	2.17118e+06	141226	546827	467213	439699	264427	621667	269798	320857	283406	529569	52803.6	335197	282421	176452	0.0421286	313660	161628	51111.2	51.5296	725758	573337	181305	78.9983	2.31384	1.21029	0.172867	Up
A0A5C2GDN8		IG c680_heavy_IGHV2-5_IGHD3-22_IGHJ4 (Fragment)		511261	1.02313e+06	372681	1.87619e+06	729549	1.23064e+06	1.07938e+06	966241	799838	250.019	250.019	250.019	250.019	250.019	250.019	250.019	250.019	250.019	1.05353e+06	1.26513e+06	0.0121223	232066	491250	155347	211.685	858915	513693	162444	59.8072	3.70117	1.88798	0.0900869	Up
A0A5C2GDR9		IGH + IGL c250_light_IGKV3-15_IGKJ3 (Fragment)		297860	16648.5	260612	329671	250.019	317027	237193	284382	522146	45240.2	80159.9	9467.64	250.019	185565	9988.58	17428.1	77842.4	63708.9	204350	137820	0.0157346	78658.1	74798.9	23653.5	95.0937	231103	164599	52050.9	71.2234	2.93807	1.55487	0.104711	Up
A0A5C2GDU0		IGH c141_heavy__IGHV5-51_IGHD3-22_IGHJ4 (Fragment)		170574	250.019	58379	461394	759191	250.019	421639	232041	356597	275116	2.95636e+06	1.49957e+06	481612	250.019	2.00267e+06	1.60893e+06	1.27162e+06	2.02074e+06	250.019	250.019	0.0137044	1.18423e+06	1.02722e+06	324835	86.7418	273543	237574	75127.6	86.8508	0.230989	-2.1141	0.0977952	Down
A0A5C2GDW3		IGH + IGL c109_heavy_IGHV3-11_IGHD3-10_IGHJ4 (Fragment)		1193.14	3637.27	250.019	1556.07	250.019	250.019	1711.39	1054.01	4543.22	250.019	30387.6	250.019	250.019	13330.2	2014.41	5407.95	25523.1	19680.6	250.019	250.019	0.0394174	9734.38	11670.6	3690.56	119.89	1469.52	1505.93	476.218	102.478	0.150962	-2.72775	0.166468	Down
A0A5C2GDX1		IGH + IGL c119_heavy_IGHV3-30_IGHD4-17_IGHJ4 (Fragment)		2.53358e+06	2.60694e+06	2.02922e+06	1.8099e+06	3.65769e+06	2620068	1926057	2.67719e+06	1.33719e+06	2.69979e+06	1860685	1235827	1.2419e+06	1.50304e+06	662929	1.76167e+06	1.01843e+06	1.25663e+06	1.59596e+06	1.94406e+06	0.000663883	1.40811e+06	401215	126875	28.4931	2.38976e+06	640868	202660	26.8172	1.69714	0.763104	0.0158068	Up
A0A5C2GDZ7		IGH c221_heavy__IGHV3-48_IGHD4-23_IGHJ6 (Fragment)		93642.9	226628	162542	35028.5	65382.8	68421.3	57994	41072.6	113532	50152.7	48710.4	3960.4	5631.88	3892.99	36406.9	8596.01	10274.5	250.019	29212.2	83588.7	0.00452255	23052.4	26804.9	8476.46	116.278	91439.7	61078.8	19314.8	66.7968	3.9666	1.9879	0.0478194	Up
A0A5C2GE58		IG c273_heavy_IGHV3-23_IGHD3-22_IGHJ5 (Fragment)		22316524	21152278	24312308	13462522	16175222	19887438	22068422	10902082	14048758	16439194	29900304	38180140	29980184	47805196	24209434	69380264	29429546	21995746	11613798	14838953	0.0237402	3.17334e+07	1.69002e+07	5.34431e+06	53.2568	1.80765e+07	4.48228e+06	1.41742e+06	24.7962	0.569636	-0.811887	0.125755	Down
A0A5C2GE66		IG c431_heavy_IGHV3-23_IGHD4-17_IGHJ5 (Fragment)		229492	73999.4	59369.7	250.019	53333.1	238559	26380.3	105467	41495.9	285984	99046.5	308952	250655	105985	427493	250.019	177438	493011	290340	243002	0.0390094	239617	151217	47819.1	63.1078	111433	101421	32072.3	91.0156	0.465046	-1.10455	0.166209	Down
A0A5C2GE69		IG c229_heavy_IGHV3-23_IGHD3-3_IGHJ4 (Fragment)		1.18883e+06	912081	985336	1.59852e+06	914503	1.18409e+06	1.0333e+06	1.08425e+06	1.20609e+06	1.86496e+06	1.10831e+06	5607532	5306960	9070735	657517	6.94089e+06	1347161	981518	1359950	1.13183e+06	0.0410015	3.35124e+06	3.07903e+06	973674	91.8773	1.1972e+06	307861	97354.2	25.7152	0.35724	-1.48504	0.170899	Down
A0A5C2GE94		IG c1052_heavy_IGHV3-23_IGHD6-13_IGHJ4 (Fragment)		657723	158378	437812	561513	550492	790993	538813	694011	741110	672214	524761	250.019	70526.6	207518	294572	493374	395687	122763	324309	484106	0.00256821	291787	186602	59008.6	63.9514	580306	182242	57629.8	31.4044	1.9888	0.9919	0.0344698	Up
A0A5C2GE97		IGH c331_heavy__IGHV3-74_IGHD3-9_IGHJ4 (Fragment)		416810	329602	577667	279413	339777	346923	250.019	277129	272011	298362	40668.5	250.019	26461.3	41321.1	250.019	250.019	250.019	250.019	326738	250.019	0.000122962	43668.9	100968	31928.7	231.211	313794	143405	45348.5	45.7002	7.18576	2.84514	0.00707276	Up
A0A5C2GEJ3		IG c1203_heavy_IGHV3-23_IGHD5-12_IGHJ3 (Fragment)		250.019	22936.7	83897.9	250.019	115280	250.019	250.019	250.019	25639.6	250.019	9114.87	54485.9	97752.6	250.019	44582.3	223194	147132	222920	181914	113481	0.00979788	109483	82904.2	26216.6	75.7236	24925.5	41230.3	13038.2	165.414	0.227666	-2.13501	0.0802812	Down
A0A5C2GEN3		IG c374_heavy_IGHV3-30_IGHD3-9_IGHJ1 (Fragment)		250.019	22604.2	250.019	250.019	250.019	8332.73	250.019	4197.2	250.019	250.019	628999	162020	142733	822064	122802	250.019	118833	244764	250.019	9092.12	0.0218339	225181	278923	88203.2	123.866	3688.42	7167.77	2266.65	194.332	0.0163799	-5.93193	0.121788	Down
A0A5C2GEQ2		IG c763_heavy_IGHV3-33_IGHD3-3_IGHJ6 (Fragment)		250.019	250.019	250.019	250.019	22662	250.019	250.019	250.019	250.019	250.019	163937	115766	250.019	42262.4	198099	91206.7	100128	66484.3	250.019	250.019	0.00310184	77863.3	69477.4	21970.7	89.2299	2491.21	7087.28	2241.19	284.491	0.0319947	-4.96602	0.0382871	Down
A0A5C2GER6		IGH c531_heavy__IGHV3-33_IGHD3-10_IGHJ4 (Fragment)		96155.6	322914	83019.2	250.019	60540.4	91035.2	212758	473753	179437	135398	438360	900772	530499	608572	264473	216508	765590	717460	66876.2	236843	0.00539323	474596	275116	86999.2	57.9684	165526	140876	44548.8	85.1079	0.348773	-1.51964	0.0534485	Down
A0A5C2GES2		IGH c541_heavy__IGHV3-21_IGHD2-8_IGHJ4 (Fragment)		2.4052e+06	1.35207e+06	1.53997e+06	1.61116e+06	2.52153e+06	1.59871e+06	959124	1.58684e+06	1.61576e+06	1.81782e+06	1.23644e+06	2.21003e+06	396356	1.17877e+06	1.27781e+06	565221	202079	731241	1.12672e+06	2153669	0.0344101	1.10783e+06	676779	214016	61.0903	1.70082e+06	461845	146048	27.1543	1.53527	0.618488	0.154041	Up
A0A5C2GEW6		IG c77_heavy_IGHV3-11_IGHD2-2_IGHJ6 (Fragment)		320042	236090	35934.3	101143	140698	104294	191120	118066	487033	189567	163434	109990	49662.2	250.019	6401.96	153644	156481	40006.9	98748	124992	0.0387588	90361	62121.9	19644.7	68.7487	192399	130720	41337.4	67.9424	2.12922	1.09033	0.165386	Up
A0A5C2GEW9		IG c1133_heavy_IGHV3-33_IGHD3-3_IGHJ6 (Fragment)		1.66858e+06	3678580	714214	2879388	1816636	719804	1050410	1.36334e+06	1.81781e+06	2037855	1.12936e+06	278979	1274732	1.28787e+06	684017	981876	1.60882e+06	955931	754058	1.41379e+06	0.0335199	1.03694e+06	392399	124088	37.8419	1.77466e+06	934551	295531	52.6608	1.71144	0.775207	0.152055	Up
A0A5C2GEX1		IG c711_heavy_IGHV1-18_IGHD3-22_IGHJ4 (Fragment)		37052.4	207664	250.019	40531.2	66845.6	42983.9	43589	80211.6	250.019	250.019	250.019	250.019	250.019	250.019	250.019	250.019	250.019	250.019	250.019	250.019	0.0156504	250.019	0	0	0	51962.8	61272.4	19376	117.916	207.835	7.6993	0.104433	Up
A0A5C2GEX7		IG c378_heavy_IGHV3-11_IGHD4-17_IGHJ4 (Fragment)		164530	339383	842665	1.18093e+06	1081664	196268	266476	587170	311912	705602	10935.5	124462	398515	114930	128957	154868	969356	18380.9	116614	342708	0.0391503	237973	285380	90245	119.921	567660	371784	117568	65.4941	2.3854	1.25423	0.166243	Up
A0A5C2GF83		IG c622_heavy_IGHV3-21_IGHD2-21_IGHJ4 (Fragment)		254522	577904	183434	424727	175247	347546	744520	633594	529985	706491	24485.5	178658	304017	27360.4	84441.2	404053	250.019	88710	114276	201206	0.000837741	142746	130695	41329.5	91.5581	457797	211943	67022.3	46.2963	3.20708	1.68126	0.0175661	Up
A0A5C2GF93		IGL c49_light_IGKV4-1_IGKJ4 (Fragment)		1.38599e+06	662222	662242	1.02619e+06	720035	495902	671802	550186	987080	1.18477e+06	279475	115398	44264.7	189593	257132	16788.6	57389.7	141645	378783	494930	1.02071e-05	197540	155383	49136.5	78.6592	834642	294630	93170.3	35.3002	4.22518	2.07901	0.00146779	Up
A0A5C2GF98		IGH + IGL c39_light_IGKV2D-40_IGKJ2 (Fragment)		276548	264270	698553	209531	476023	250.019	1069296	250.019	718442	468962	1.20762e+06	1.04023e+06	653823	1.18902e+06	406109	1.86965e+06	597607	565172	391617	444067	0.0371149	836492	479829	151735	57.3621	418213	339159	107251	81.0971	0.49996	-1.00011	0.161843	Down
A0A5C2GFD9		IG c640_heavy_IGHV1-69_IGHD2-8_IGHJ5 (Fragment)		19354.9	70183.4	11745.1	40939.7	16243.7	9186.07	35935	141571	21147.3	31333.1	18643	10557.6	250.019	250.019	250.019	250.019	250.019	250.019	39415	30578.6	0.0408403	10069.4	14659.3	4635.68	145.582	39763.9	40018.7	12655	100.641	3.94897	1.98148	0.170523	Up
A0A5C2GFE8		IG c282_heavy_IGHV3-23_IGHD3-22_IGHJ4 (Fragment)		986140	632530	973439	360921	1.02987e+06	782521	853146	375038	603250	701304	202357	88186.1	273156	313664	218530	352008	374747	739699	394293	584489	0.00110616	354113	189770	60010.6	53.5903	729816	240675	76108.2	32.9775	2.06097	1.04332	0.0205245	Up
A0A5C2GFF2		IG c696_heavy_IGHV4-34_IGHD3-10_IGHJ4 (Fragment)		3.21562e+06	3794702	1977039	3.4879e+06	2.33483e+06	2.58298e+06	3021407	3638338	3.29888e+06	2119154	4.98829e+06	5423185	7555948	5045097	8977573	6390971	3848360	16474884	1596677	2604141	0.022666	6.29051e+06	4.19176e+06	1.32555e+06	66.6362	2.94708e+06	651839	206130	22.1181	0.468497	-1.09389	0.123695	Down
A0A5C2GFF3		IG c1142_heavy_IGHV3-73_IGHD3-22_IGHJ4 (Fragment)		504895	214442	1.28092e+06	486139	902734	481399	738079	710128	553673	1188020	546740	477942	2.73772e+06	1.29598e+06	1.23638e+06	2.19848e+06	874499	1.59917e+06	438282	2.00648e+06	0.030931	1.34117e+06	789995	249818	58.9035	706043	334446	105761	47.3691	0.526439	-0.925661	0.144647	Down
A0A5C2GFH4		IG c410_heavy_IGHV3-23_IGHD2-21_IGHJ4 (Fragment)		606026	177667	809568	366822	96134.4	118669	326782	767914	284321	400266	5701760	1.88753e+06	5736988	4405366	16956.9	944633	3.98728e+06	1879.28	612633	588586	0.0150085	2.38836e+06	2.33007e+06	736834	97.5595	395417	255191	80698.3	64.5371	0.16556	-2.59457	0.102773	Down
A0A5C2GFJ5		IGH + IGL c11_light_IGLV3-10_IGLJ3 (Fragment)		250.019	250.019	119823	250.019	250.019	250.019	250.019	833.845	250.019	250.019	250.019	804594	1.1879e+06	1.46187e+06	174709	1.18302e+06	250.019	250.019	250.019	250.019	0.0251742	481335	606335	191740	125.97	12265.7	37792.2	11950.9	308.113	0.0254826	-5.29434	0.128827	Down
A0A5C2GFM6		IG c387_heavy_IGHV3-30_IGHD5-18_IGHJ4 (Fragment)		250.019	250.019	250.019	250.019	250.019	250.019	250.019	250.019	250.019	250.019	235902	297430	250.019	10823.5	256288	178361	72588	166964	250.019	4838.61	0.00420903	122370	117924	37290.8	96.367	250.019	0	0	0	0.00204315	-8.93499	0.0455082	Down
A0A5C2GFQ3		IG c822_heavy_IGHV3-30_IGHD2-2_IGHJ6 (Fragment)		38304.9	7785.88	250.019	9397.27	10719.1	250.019	10526.1	4138.22	250.019	69476	77450.3	250.019	250.019	151838	240933	323720	175386	84551.6	250.019	250.019	0.0249791	105488	114760	36290.3	108.79	15109.8	22118.6	6994.5	146.386	0.143237	-2.80352	0.12869	Down
A0A5C2GFS7		IGH + IGL c219_light_IGKV1-12_IGKJ4 (Fragment)		2484634	42776.8	1.01288e+06	1.24403e+06	1.44114e+06	2.81249e+06	2.43037e+06	2.13182e+06	2.3196e+06	3.00828e+06	771639	561505	129806	84088	250.019	279658	992924	897555	1.41575e+06	1280173	0.00152871	641335	509295	161053	79.4118	1.8928e+06	930378	294211	49.1535	2.95135	1.56137	0.0252914	Up
A0A5C2GFS8		IG c1078_heavy_IGHV3-30_IGHD3-3_IGHJ4 (Fragment)		250.019	250.019	250.019	250.019	250.019	250.019	250.019	250.019	250.019	250.019	3.34157e+06	2057963	250.019	250.019	250.019	2.3147e+06	2.61503e+06	70955.8	250.019	250.019	0.0269757	1.04015e+06	1.36559e+06	431837	131.288	250.019	0	0	0	0.000240369	-12.0225	0.134926	Down
A0A5C2GFX4		IGH + IGL c71_light_IGKV1-9_IGKJ2 (Fragment)		194063	64405.7	732966	593034	1.83437e+06	324469	1.93603e+06	983913	2.00934e+06	401636	224487	132677	42159.8	98180.7	73887	120928	192077	148170	281141	685214	0.0097246	199892	184793	58436.6	92.4462	907423	751430	237623	82.8093	4.53956	2.18255	0.0801374	Up
A0A5C2GG09		IGH + IGL c299_light_IGKV3-11_IGKJ1 (Fragment)		239711	120027	110908	134307	155034	81031	116851	68139.9	39334.8	44161.7	250.019	250.019	75149.1	250.019	111927	250.019	250.019	250.019	246313	250.019	0.0485448	43514	81589.1	25800.7	187.501	110950	59163.4	18709.1	53.3241	2.54977	1.35037	0.188669	Up
A0A5C2GG46		IGL c389_light_IGKV1D-39_IGKJ1 (Fragment)		104505	97858.2	69599.2	145949	78030	156729	50518.1	71218.6	168434	47300.4	25674.1	84067	1781.06	16778.7	12951.5	34377.5	6046.6	35502.4	6930.15	79653.6	0.000683065	30376.3	29483	9323.33	97.0592	99014.2	44081.9	13939.9	44.5208	3.25959	1.70469	0.0161024	Up
A0A5C2GG81		IG c542_heavy_IGHV3-53_IGHD3-10_IGHJ6 (Fragment)		250.019	250.019	250.019	250.019	250.019	250.019	250.019	250.019	250.019	250.019	94133.2	199571	250.019	5711.9	51969.8	27564.1	10541	59679.7	250.019	250.019	0.037253	44992	62904.6	19892.2	139.813	250.019	0	0	0	0.00555697	-7.49149	0.161843	Down
A0A5C2GG86		IG c359_heavy_IGHV3-30_IGHD3-22_IGHJ4 (Fragment)		250.019	39878.9	250.019	34053.7	22630.3	250.019	250.019	250.019	250.019	250.019	125504	39437.4	109182	145416	40291.1	35526	332707	71110	250.019	250.019	0.0210001	89967.4	98920.8	31281.5	109.952	9831.29	15972.2	5050.85	162.463	0.109276	-3.19395	0.120072	Down
A0A5C2GGB8		IG c265_heavy_IGHV3-23_IGHD2-21_IGHJ6 (Fragment)		323148	282068	157795	275886	348197	431800	351176	362787	407179	294149	250.019	250.019	250.019	250.019	219249	250.019	207708	250.019	250.019	191829	3.75341e-06	62053.6	99724.6	31535.7	160.707	323419	77426.5	24484.4	23.94	5.21192	2.38182	0.000985405	Up
A0A5C2GGH4		IG c478_heavy_IGHV5-51_IGHD2-2_IGHJ4 (Fragment)		250.019	250.019	250.019	250.019	250.019	250.019	250.019	250.019	250.019	250.019	27411.8	42237.6	18825.5	40525.5	12801.4	47432.8	18104.6	52981.1	250.019	250.019	0.000450379	26082	19084.8	6035.13	73.1722	250.019	0	0	0	0.00958589	-6.70487	0.0136559	Down
A0A5C2GGH7		IG c408_heavy_IGHV3-33_IGHD3-22_IGHJ6 (Fragment)		1.06478e+06	687535	1.06826e+06	664739	715546	567790	693757	542850	556315	490642	369628	509676	454544	471703	504406	422624	312381	433830	570989	501993	0.00191866	455177	74904.4	23686.8	16.4561	705221	204597	64699.2	29.0117	1.54933	0.631647	0.029667	Up
A0A5C2GGI7		IGH + IGL c519_light_IGKV1-5_IGKJ4 (Fragment)		5436519	2.4019e+06	2.43427e+06	1.14575e+06	2.48885e+06	1.11146e+06	1.94574e+06	1.53463e+06	2.46559e+06	1.89435e+06	32980.1	98661.9	72748.8	524355	103276	514438	1.13485e+06	100480	673948	1.12901e+06	0.000281537	438475	430842	136244	98.2593	2.28591e+06	1.22692e+06	387987	53.6734	5.21331	2.3822	0.0103545	Up
A0A5C2GGM8		IGL c589_light_IGKV3-20_IGKJ4 (Fragment)		2.03845e+06	1.16533e+06	15023.4	1.01302e+06	523344	32817.4	1.18502e+06	707714	678543	785953	569909	250.019	250.019	63718.7	50365.8	36103.7	250.019	705864	586078	65658.6	0.00933004	207845	288048	91088.8	138.588	814522	592875	187483	72.7881	3.9189	1.97045	0.0773291	Up
A0A5C2GGP0		IGH + IGL c589_light_IGKV1D-33_IGKJ4 (Fragment)		371763	319453	95905	396485	546467	292989	624838	183810	79045.2	198397	10343.5	432017	34080.2	10540.6	27085.4	46593.2	18069.9	36591.9	368488	201842	0.0212317	118565	159351	50391.2	134.4	310915	180819	57180	58.1571	2.62231	1.39084	0.120351	Up
A0A5C2GGQ2		IGH + IGL c361_light_IGLV3-19_IGLJ1 (Fragment)		231779	862614	163500	1.00365e+06	1.22679e+06	691208	620271	1.36098e+06	1.13982e+06	251628	250.019	93964.7	83139.3	250.019	250.019	200816	250.019	250.019	1.21896e+06	1.00426e+06	0.0232282	260239	456219	144269	175.308	755224	435957	137862	57.7255	2.90204	1.53707	0.125043	Up
A0A5C2GGR8		IG c712_heavy_IGHV3-30_IGHD6-19_IGHJ4 (Fragment)		3877734	1.07701e+06	4.23429e+06	3.85291e+06	3.95643e+06	4963407	3.49732e+06	3.20909e+06	2.59885e+06	3.2938e+06	150788	250.019	102363	105065	397167	2.96196e+06	2492901	4.91993e+06	2.34305e+06	3.73464e+06	0.0169769	1.72081e+06	1.80188e+06	569805	104.711	3.45608e+06	1.0513e+06	332451	30.4189	2.0084	1.00605	0.108261	Up
A0A5C2GGS8		IG c894_heavy_IGHV3-30_IGHD3-3_IGHJ6 (Fragment)		613081	801814	349690	761424	781615	638373	637233	782498	541929	907165	335040	132245	241276	244368	364334	167077	391831	888908	423354	79812.4	0.000798422	326825	228393	72224.1	69.8823	681482	159892	50562.4	23.4624	2.08516	1.06016	0.0173819	Up
A0A5C2GGU0		IGH + IGL c639_light_IGKV1-5_IGKJ1 (Fragment)		250.019	250.019	250.019	250.019	250.019	250.019	250.019	250.019	250.019	250.019	250.019	179732	473792	167195	534388	250.019	311038	250.019	250.019	250.019	0.0208566	166739	207908	65746.2	124.69	250.019	0	0	0	0.00149946	-9.38134	0.119967	Down
A0A5C2GGY3		IGH + IGL c24_light_IGKV1-5_IGKJ1 (Fragment)		123714	170712	37450.3	118638	177186	64009.5	250.019	20741.1	145146	53606.6	1432.11	250.019	250.019	250.019	1789.52	250.019	250.019	250.019	122530	250.019	0.00378867	12750.1	38576.8	12199.1	302.56	91145.3	63869.5	20197.3	70.0744	7.14858	2.83766	0.0427302	Up
A0A5C2GGY7		IG c441_heavy_IGHV4-39_IGHD3-9_IGHJ4 (Fragment)		110335	20750.3	166587	243677	153341	214936	182206	108560	201900	169433	672143	730769	449349	1.07591e+06	1.11789e+06	853280	968898	1.38554e+06	138923	216882	0.000184006	760959	402397	127249	52.8802	157173	64003.8	20239.8	40.722	0.206546	-2.27547	0.00883958	Down
A0A5C2GH26		IG c1215_heavy_IGHV3-33_IGHD3-22_IGHJ6 (Fragment)		714081	671189	385396	250.019	321474	232956	429801	306588	521436	457989	250.019	591104	250.019	250.019	69401.6	250.019	119410	250.019	243884	194634	0.00524706	121968	187699	59355.6	153.892	404116	209186	66150.3	51.7637	3.31329	1.72826	0.0527642	Up
A0A5C2GH36		IG c401_light_IGKV3-20_IGKJ4 (Fragment)		3.96549e+06	2.33281e+06	1.65279e+06	1.97109e+06	3.74713e+06	3.32876e+06	2751985	1.70821e+06	2.74144e+06	1.86805e+06	1.91115e+06	873424	1.28331e+06	1.9932e+06	1.431e+06	295279	2.06723e+06	686700	1.3693e+06	899203	0.000749344	1.28098e+06	595307	188253	46.4728	2.60677e+06	846522	267694	32.4739	2.03498	1.02502	0.0167161	Up
A0A5C2GHD1		IG c462_light_IGKV1D-39_IGKJ2 (Fragment)		1.18913e+06	1.22959e+06	1.45304e+06	2.78844e+06	1.55563e+06	1.66576e+06	1.01731e+06	1524543	1.30099e+06	1.15645e+06	695587	883310	202508	132754	1.31938e+06	1497968	1.75684e+06	1.42732e+06	1.20622e+06	728317	0.0461597	985021	549129	173650	55.7479	1.48809e+06	500270	158199	33.6183	1.51072	0.595234	0.182708	Up
A0A5C2GHE4		IG c288_light_IGKV1D-33_IGKJ3 (Fragment)		10246.2	250.019	250.019	55947.3	10222.8	250.019	19992.9	31753	250.019	250.019	209229	890393	839546	323645	180969	1.00009e+06	259342	176672	250.019	34644.2	0.00482357	391478	372112	117672	95.0532	12941.2	18478.6	5843.44	142.788	0.0330574	-4.91888	0.0499013	Down
A0A5C2GHI6		IG c437_heavy_IGHV3-74_IGHD5-24_IGHJ6 (Fragment)		1.19985e+06	868809	1.63907e+06	530392	2.18103e+06	410444	421013	1.37248e+06	940568	541741	371687	529685	413675	165545	196467	282358	289716	250.019	255606	193629	0.00114009	269862	146849	46437.9	54.4165	1.01054e+06	588303	186038	58.2166	3.74466	1.90483	0.0209063	Up
A0A5C2GHI9		IG c586_heavy_IGHV4-34_IGHD2-21_IGHJ3 (Fragment)		9247.92	250.019	250.019	6766.7	27615.9	250.019	18107.3	9725.69	250.019	26730.2	93408.3	250.019	17210.2	70274.9	10124.4	43217.3	26825.7	80350.7	250.019	7191.29	0.0442724	34910.3	34913.4	11040.6	100.009	9919.38	10787	3411.14	108.746	0.284139	-1.81533	0.178413	Down
A0A5C2GHN2		IG c1239_light_IGKV3-15_IGKJ2 (Fragment)		863640	1.06166e+06	897780	1275123	889642	876151	911372	681597	1.28239e+06	1.01611e+06	709625	502236	708114	417606	105293	425116	77201.6	355874	852072	959001	0.000555872	511214	295965	93592.4	57.8946	975547	188360	59564.5	19.3081	1.90829	0.932283	0.0146669	Up
A0A5C2GHR5		IG c336_heavy_IGHV3-53_IGHD2-8_IGHJ3 (Fragment)		642958	38501.5	250.019	6859.97	6241.71	17139.6	250.019	393099	1330.67	250.019	247481	3.03425e+06	1.70886e+06	2.26667e+06	205400	2413143	250.019	274514	6237.42	250.019	0.0306497	1.01571e+06	1.19955e+06	379330	118.1	110688	222927	70495.7	201.401	0.108976	-3.19791	0.144477	Down
A0A5C2GHS2		IG c34_heavy_IGHV4-34_IGHD6-13_IGHJ4 (Fragment)		250.019	250.019	250.019	250.019	250.019	250.019	250.019	7764.45	250.019	250.019	295618	16886.2	206657	63085.6	104554	85704.4	81593.9	505184	221900	250.019	0.00469877	158143	154076	48723	97.4278	1001.46	2376.27	751.443	237.28	0.00633262	-7.30298	0.0487858	Down
A0A5C2GHT7		IG c1037_heavy_IGHV3-53_IGHD5-24_IGHJ4 (Fragment)		4.71735e+06	3.86002e+06	4.1985e+06	2.2156e+06	2214044	2.92548e+06	3.968e+06	3.71773e+06	2567296	3.31818e+06	17515.7	250.019	1.68935e+06	1.54812e+06	602976	1.361e+06	422215	202365	3.79567e+06	4.68326e+06	0.00362089	1.43227e+06	1.61631e+06	511121	112.849	3.37022e+06	864992	273534	25.6657	2.35306	1.23454	0.0419906	Up
A0A5C2GHU5		IGH + IGL c315_heavy_IGHV3-11_IGHD3-3_IGHJ2 (Fragment)		49213.5	321575	250.019	7230.07	110708	166089	250.019	214886	50967.1	282237	605983	2361568	2.57959e+06	1.61529e+06	443715	1.63415e+06	682287	486868	250.019	34902.1	0.00618257	1.04446e+06	935106	295706	89.53	120341	119879	37909.2	99.6167	0.115218	-3.11756	0.0581081	Down
A0A5C2GHW7		IG c775_light_IGLV3-21_IGLJ2 (Fragment)		6660857	1999466	2.17027e+06	3.81819e+06	1.55893e+06	5561445	935221	4030226	250.019	1.79592e+06	36081.5	572738	13967.5	250.019	1.34173e+06	385787	353433	250.019	2.26356e+06	155479	0.00385449	512327	739863	233965	144.412	2.85308e+06	2.10702e+06	666297	73.8506	5.56886	2.47738	0.0431343	Up
A0A5C2GI06		IG c15_light_IGKV3-20_IGKJ1 (Fragment)		6527739	2.51556e+06	4.39126e+06	5.53772e+06	5135348	3.38061e+06	4.34008e+06	3.80839e+06	6.37923e+06	4040736	3021556	1.08398e+06	781304	1.54627e+06	1944666	1.17205e+06	1.46819e+06	1.40421e+06	2103941	3.1041e+06	1.23236e-05	1.76303e+06	786581	248739	44.6154	4.60567e+06	1.28797e+06	407292	27.9649	2.61236	1.38536	0.00161103	Up
A0A5C2GI12		IG c983_heavy_IGHV4-39_IGHD1-7_IGHJ1 (Fragment)		250.019	86809.7	250.019	250.019	250.019	250.019	250.019	250.019	250.019	250.019	54739.6	250.019	18052.2	44701.8	268884	317985	244994	437481	203713	250.019	0.0076461	159105	155813	49272.5	97.9311	8905.99	27372.6	8655.97	307.35	0.0559755	-4.15906	0.0669525	Down
A0A5C2GI26		IG c576_light_IGLV1-47_IGLJ3 (Fragment)		324291	192848	143641	42051	55839.2	310439	51741.3	76412.1	144296	150979	250.019	250.019	250.019	250.019	250.019	162258	250.019	250.019	114850	230860	0.0317895	50971.8	86174.1	27250.6	169.062	149254	101987	32251	68.331	2.92816	1.55	0.146752	Up
A0A5C2GI43		IG c1304_light_IGKV1-9_IGKJ2 (Fragment)		1349144	276253	5.0117e+06	743813	2.16659e+06	250.019	248784	790122	1.87716e+06	663957	312503	250.019	250.019	250.019	316068	250.019	250.019	763922	752450	45861.8	0.0344028	219205	310717	98257.5	141.747	1.31278e+06	1.47866e+06	467594	112.636	5.9888	2.58227	0.154041	Up
A0A5C2GIA3		IG c505_light_IGKV3-15_IGKJ1 (Fragment)		250.019	250.019	250.019	250.019	250.019	250.019	250.019	250.019	250.019	250.019	271769	303466	352084	605668	260190	263746	127175	55037.1	250.019	250.019	0.00130573	223964	186075	58841.9	83.0825	250.019	0	0	0	0.00111634	-9.80701	0.0228376	Down
A0A5C2GIF9		IG c146_light_IGKV1-5_IGKJ2 (Fragment)		3.06238e+06	2.40584e+06	1.96211e+06	2.61633e+06	1.99587e+06	1.0134e+06	1.75368e+06	1.0679e+06	2.18833e+06	1.91964e+06	854182	250.019	250.019	357049	250.019	9039.4	61940.3	27465.4	2091510	1761410	0.000216039	516335	793918	251059	153.76	1.99855e+06	634161	200539	31.7311	3.87065	1.95258	0.00907767	Up
A0A5C2GIH9		IG c955_light_IGKV2D-29_IGKJ1 (Fragment)		250.019	250.019	250.019	250.019	250.019	250.019	250.019	250.019	250.019	250.019	98041.5	64611.9	117973	250.019	250.019	147224	111493	492252	250.019	250.019	0.0411934	103260	148135	46844.6	143.459	250.019	0	0	0	0.00242127	-8.69002	0.171203	Down
A0A5C2GIJ6		IG c715_heavy_IGHV3-11_IGHD4-17_IGHJ2 (Fragment)		250.019	250.019	250.019	250.019	1.40698e+06	250.019	250.019	250.019	250.019	250.019	758278	1.08804e+06	553819	250.019	1.49558e+06	772467	429355	1.52214e+06	1.1393e+06	250.019	0.0105595	775947	545415	172475	70.2902	140923	444846	140673	315.667	0.181614	-2.46105	0.0842761	Down
A0A5C2GIK6		IG c1053_heavy_IGHV3-11_IGHD5-18_IGHJ4 (Fragment)		377127	296368	224305	547697	283721	84249.4	161177	191077	571497	362393	114819	163837	116612	261087	47823.5	287542	174990	139146	208336	148462	0.0178203	166265	71292.9	22544.8	42.879	309961	159027	50288.7	51.3054	1.86425	0.898599	0.111115	Up
A0A5C2GIL0		IG c964_light_IGKV3-15_IGKJ3 (Fragment)		250.019	250.019	250.019	250.019	250.019	250.019	250.019	250.019	250.019	250.019	953682	898075	1.85795e+06	1.11405e+06	1.23972e+06	250.019	731729	1.07283e+06	250.019	250.019	0.000797552	786879	618299	195523	78.5762	250.019	0	0	0	0.000317735	-11.6199	0.0173819	Down
A0A5C2GIQ1		IG c284_light_IGKV2-30_IGKJ1 (Fragment)		250.019	9362434	250.019	8631317	7856496	5.4952e+06	2227325	872631	10270816	7.19956e+06	250.019	250.019	22149.5	250.019	250.019	250.019	250.019	250.019	8.37692e+06	2.68086e+06	0.0160698	1.10817e+06	2.68907e+06	850359	242.659	5.19163e+06	4.04959e+06	1.28059e+06	78.0022	4.68488	2.22801	0.105518	Up
A0A5C2GIT5		IG c402_heavy_IGHV3-21_IGHD2-15_IGHJ1 (Fragment)		21488162	195971	10592337	10560004	6.89837e+06	4.81031e+06	6.3455e+06	5.56326e+06	5.66961e+06	8813457	274127	250.019	193291	7647094	7755006	3968739	345310	2.18698e+06	3.87337e+06	2.54749e+06	0.0178459	2.87917e+06	2.94355e+06	930833	102.236	8.0937e+06	5.59935e+06	1.77067e+06	69.1816	2.81113	1.49115	0.111115	Up
A0A5C2GIX7		IG c873_light_IGLV3-25_IGLJ1 (Fragment)		250.019	14728.9	250.019	89150.8	88909.6	11971.6	15239.3	50225.7	114161	140565	250.019	250.019	250.019	250.019	250.019	77894.8	250.019	250.019	53315.9	250.019	0.0497195	13321.1	28158.6	8904.54	211.384	52545.2	51800.1	16380.6	98.5821	3.94451	1.97985	0.191147	Up
A0A5C2GJ13		IG c501_heavy_IGHV3-23_IGHD3-16_IGHJ5 (Fragment)		250.019	12372.3	22951.9	250.019	250.019	9884.56	4710.74	11797.2	95860.7	12712.2	271011	188183	35349.2	28588.4	157348	25848.2	48917.7	162313	250.019	13446.3	0.0242111	93125.5	93421.9	29542.6	100.318	17104	28605.6	9045.89	167.246	0.183666	-2.44485	0.1268	Down
A0A5C2GJ23		IG c428_light_IGKV2-30_IGKJ2 (Fragment)		1.86998e+06	250.019	1.07955e+06	1.94486e+06	250.019	1.58585e+06	1.69272e+06	250.019	2.4191e+06	2.02079e+06	7464204	3439343	2.5423e+06	2.04247e+06	2268388	4.68932e+06	2.9937e+06	1.82419e+06	3.2761e+06	1.99995e+06	0.00466923	3.254e+06	1.71436e+06	542129	52.6848	1.26136e+06	933946	295340	74.0428	0.387634	-1.36723	0.0487858	Down
A0A5C2GJ36		IG c844_light_IGKV2D-29_IGKJ4 (Fragment)		250.019	17156.6	250.019	250.019	250.019	250.019	250.019	250.019	250.019	250.019	47821.6	54420.9	28412.9	43834.3	31645.5	46111.2	20636.4	20374.8	250.019	250.019	0.000382794	29375.8	19197	6070.62	65.3498	1940.68	5346.32	1690.66	275.488	0.0660639	-3.92	0.0124303	Down
A0A5C2GJ52		IG c1284_light_IGKV1-5_IGKJ2 (Fragment)		16398.4	250.019	72154.2	40684.8	92408.1	102999	39025.3	42142.5	44738.1	14465	250.019	250.019	29457.2	250.019	11184.8	2582.87	8711	9840.45	50368.7	32338.4	0.015128	14523.3	17146.1	5422.07	118.059	46526.5	33567.5	10615	72.147	3.20357	1.67968	0.103259	Up
A0A5C2GJ56		IG c891_light_IGKV3-20_IGKJ5 (Fragment)		1.94132e+06	793433	1.23802e+06	250.019	2.33698e+06	898150	1.70874e+06	1.03137e+06	932727	1.02301e+06	250.019	250.019	250.019	241192	1.58607e+06	250.019	250.019	910966	250.019	755504	0.0063691	349523	553050	174890	158.23	1.1904e+06	660692	208929	55.5018	3.40578	1.76798	0.0588988	Up
A0A5C2GJ63		IG c26_light_IGLV1-40_IGLJ3 (Fragment)		7903970	9610814	5.4638e+06	6841880	6.96571e+06	5059131	7.1579e+06	5.29595e+06	9988601	11891821	373071	3.83221e+06	449707	495468	5875484	582185	3.29742e+06	3.34473e+06	12852578	9838489	0.0340207	4.09413e+06	4.30192e+06	1.36039e+06	105.075	7.61796e+06	2.25483e+06	713039	29.5988	1.8607	0.895846	0.15336	Up
A0A5C2GJC8		IG c141_light_IGKV2D-28_IGKJ4 (Fragment)		5553.34	250.019	250.019	2583.35	250.019	250.019	992.203	250.019	250.019	250.019	11624.7	6161.4	5630.14	2526.12	5980.58	4451.66	3378.54	2211.48	250.019	250.019	0.017048	4246.47	3380.77	1069.09	79.6137	1087.9	1735.26	548.736	159.505	0.25619	-1.96471	0.108473	Down
A0A5C2GJE3		IG c985_light_IGKV3-15_IGKJ1 (Fragment)		321503	278485	170305	1.29628e+06	384247	250.019	466550	250.019	288890	89470.2	250.019	250.019	250.019	26834.8	365476	250.019	250.019	250.019	250.019	16161.6	0.0315055	41022.2	114371	36167.2	278.802	329623	374243	118346	113.537	8.03522	3.00634	0.146198	Up
A0A5C2GJE6		IG c1115_light_IGLV1-40_IGLJ1 (Fragment)		854082	656389	765538	860180	930116	1064372	754147	328558	924647	633380	250.019	250.019	250.019	67966.4	250.019	250.019	250.019	119340	1608446	1.25389e+06	0.0302552	305114	600671	189949	196.868	777141	204835	64774.4	26.3575	2.54705	1.34883	0.143766	Up
A0A5C2GJI3		IG c881_heavy_IGHV3-21_IGHD6-6_IGHJ4 (Fragment)		2.17483e+06	1.57345e+06	2.3512e+06	787173	689669	1.04958e+06	1.33424e+06	1.14458e+06	2.19479e+06	1.27721e+06	860684	4165702	4242918	5144241	2088942	5.43035e+06	2.67518e+06	1.41209e+06	1.33428e+06	2.06878e+06	0.016326	2.94232e+06	1.66834e+06	527576	56.7016	1.45767e+06	598259	189186	41.0421	0.495417	-1.01329	0.106956	Down
A0A5C2GJL6		IG c432_light_IGKV3-20_IGKJ1 (Fragment)		1336358	939522	567108	1.44023e+06	1.05031e+06	2.09399e+06	1.17584e+06	2.06412e+06	993038	1.21646e+06	1060793	533374	367646	312290	1.08751e+06	778939	372476	745114	1.0414e+06	1.11918e+06	0.00819607	741872	326454	103234	44.0041	1.2877e+06	480718	152016	37.3316	1.73574	0.795552	0.0703639	Up
A0A5C2GJM6		IG c650_light_IGKV4-1_IGKJ1 (Fragment)		707984	1067764	451946	1.12778e+06	610388	660640	1.00757e+06	561378	789739	1052933	513059	271108	67350.6	401510	540203	511758	156337	1.31583e+06	356781	627006	0.024108	476094	344128	108823	72.2814	803812	242230	76600	30.1352	1.68835	0.75561	0.1268	Up
A0A5C2GJQ5		IG c477_light_IGLV1-40_IGLJ3 (Fragment)		1.94287e+06	1.28595e+06	1.82264e+06	2281847	1.95156e+06	1.71641e+06	1.85528e+06	1.4255e+06	1.77416e+06	1.64792e+06	2.36767e+06	5089541	1.88065e+06	2.6473e+06	2677253	2.79495e+06	2.83266e+06	3267060	1.46121e+06	1.66797e+06	0.0154122	2.66863e+06	1.02377e+06	323746	38.3633	1.77041e+06	280011	88547.2	15.8161	0.663418	-0.59201	0.104054	Down
A0A5C2GJR5		IG c837_light_IGKV1-39_IGKJ2 (Fragment)		3.46418e+06	6.11017e+06	5.3074e+06	5500657	3239238	3.41872e+06	4167787	3.52577e+06	2.23103e+06	3.05603e+06	1.49547e+06	989057	1.04793e+06	1.03074e+06	1.05788e+06	982135	159243	1.30607e+06	2.61865e+06	891666	4.26212e-06	1.15788e+06	617843	195379	53.3596	4.0021e+06	1.24236e+06	392869	31.0427	3.45639	1.78926	0.000985405	Up
A0A5C2GJY0		IG c758_light_IGKV3-20_IGKJ3 (Fragment)		775701	820586	1.06901e+06	692464	486144	651889	1.20209e+06	852081	2.04776e+06	840337	260971	48697.1	45797.3	446517	440423	374704	236457	685815	435864	560847	0.001157	353609	207288	65550.1	58.6206	943806	437354	138304	46.3394	2.66907	1.41634	0.0210604	Up
A0A5C2GK02		IG c386_light_IGKV1-9_IGKJ3 (Fragment)		1.38376e+06	1217999	2484306	2.37846e+06	1.61228e+06	2.67414e+06	2305436	1.5066e+06	2.49502e+06	1.87127e+06	39650	53904.5	250.019	305509	957414	148698	24605.1	19302.8	828478	346334	9.94856e-08	272415	349884	110643	128.438	1.99293e+06	534551	169040	26.8225	7.31578	2.87101	0.000286121	Up
A0A5C2GK17		IGH + IGL c357_light_IGKV1D-39_IGKJ1 (Fragment)		1.91118e+06	1.31636e+06	487967	1.29782e+06	2.12504e+06	649739	974729	609008	1.37161e+06	708741	499482	269535	1191800	36253.9	54046.4	122084	186222	188983	781170	576506	0.00232686	390608	372512	117799	95.3673	1.14522e+06	561264	177487	49.0093	2.93189	1.55183	0.0326131	Up
A0A5C2GK18		IG c286_light_IGKV3-11_IGKJ1 (Fragment)		8647566	7.00034e+06	8432261	12602229	14121316	4.88558e+06	6337989	4.17964e+06	1.0461e+06	7.44483e+06	3708822	55218.1	622045	2.19502e+06	2.55723e+06	1.29135e+06	2109670	2.54216e+06	250.019	9208216	0.00314415	2.429e+06	2.66405e+06	842448	109.677	7.46979e+06	3.8466e+06	1.2164e+06	51.4955	3.07525	1.62071	0.0384351	Up
A0A5C2GK44		IG c128_light_IGLV3-25_IGLJ2 (Fragment)		250.019	30826	250.019	250.019	250.019	250.019	250.019	250.019	123873	250.019	116235	250.019	250.019	250.019	147657	250.019	356625	251194	250.019	232360	0.0432303	110532	132250	41821.2	119.649	15669.9	39214.2	12400.6	250.252	0.141768	-2.8184	0.175608	Down
A0A5C2GK74		IG c1338_light_IGLV1-51_IGLJ3 (Fragment)		193204	250.019	16908.4	47809.6	157260	113210	250.019	250.019	250.019	250.019	250.019	250.019	250.019	250.019	250.019	250.019	250.019	250.019	250.019	250.019	0.0371853	250.019	0	0	0	52964.2	74083.2	23427.2	139.874	211.841	7.72683	0.161843	Up
A0A5C2GKA1		IGH + IGL c447_light_IGLV3-25_IGLJ3 (Fragment)		250.019	153410	321197	250.019	250.019	250.019	83907	211887	250.019	57528.2	250.019	250.019	250.019	250.019	250.019	250.019	250.019	250.019	250.019	250.019	0.0315776	250.019	0	0	0	82917.9	112148	35464.3	135.252	331.646	8.3735	0.146243	Up
A0A5C2GKA6		IG c1047_heavy_IGHV4-34_IGHD1-26_IGHJ4 (Fragment)		112421	214542	414000	302716	135028	264429	234086	132951	226207	250.019	637200	518120	486939	1236651	697185	765753	1.21265e+06	800157	250.019	250.019	0.00567992	635515	419696	132719	66.0402	203663	114848	36318.1	56.3912	0.320469	-1.64174	0.0549735	Down
A0A5C2GKD2		IGH + IGL c487_light_IGKV1-12_IGKJ3 (Fragment)		1.63072e+06	664004	3.01519e+06	1.75214e+06	1.86097e+06	769954	976305	1.03491e+06	1.93388e+06	21226.9	235186	4442.33	250.019	5580.85	186822	7049.54	43618.6	21173.6	812835	944502	0.000974972	226146	354970	112251	156.965	1.36593e+06	844885	267176	61.8542	6.04004	2.59456	0.0191298	Up
A0A5C2GKD4		IG c419_light_IGKV1-33_IGKJ2 (Fragment)		250.019	250.019	250.019	250.019	250.019	250.019	250.019	250.019	250.019	250.019	5198.43	15965.6	9671.26	6452	53178.9	58707.1	11275.8	12829.9	250.019	250.019	0.0188376	17377.9	20985.6	6636.24	120.76	250.019	0	0	0	0.0143872	-6.11907	0.113777	Down
A0A5C2GKD9		IG c15_heavy_IGHV3-74_IGHD3-9_IGHJ4 (Fragment)		850690	536002	713639	1.01618e+06	973028	980545	992689	927168	1.45625e+06	993405	518871	307707	307367	121140	328052	93727.7	97580.9	319923	795632	1089250	0.000416055	397925	322729	102056	81.1031	943960	236437	74767.8	25.0473	2.37221	1.24623	0.0130063	Up
A0A5C2GKH6		IG c1226_heavy_IGHV3-53_IGHD5-12_IGHJ4 (Fragment)		49906	288269	1.26909e+06	196761	245678	239900	547583	806372	390091	223695	785.65	183527	549374	4303.6	3789.34	4632.63	589.841	4792.44	108507	61979	0.0173673	92228.1	171959	54378.1	186.449	425735	364021	115114	85.5042	4.61611	2.20668	0.109536	Up
A0A5C2GKL0		IG c1314_light_IGKV1-12_IGKJ4 (Fragment)		81313.2	13535.5	27953.6	29563.7	33596.6	26652.7	52214	83382.2	56828.5	10241	7032.62	250.019	250.019	7727.76	5033.84	4357.1	6521.35	27209.9	73539.1	15894.9	0.0232595	14781.7	22141.5	7001.75	149.79	41528.1	25942.2	8203.64	62.469	2.80943	1.49028	0.125043	Up
A0A5C2GKN1		IG c280_light_IGKV3-20_IGKJ2 (Fragment)		1.04605e+06	2.12847e+06	1.33009e+06	579556	582342	1.10767e+06	862669	877052	119224	620064	602379	331941	564503	639085	843182	491096	526605	177774	547998	626144	0.0444572	535071	179672	56817.2	33.579	925318	542181	171453	58.594	1.72934	0.790219	0.178824	Up
A0A5C2GKP8		IGH + IGL c617_light_IGKV1-33_IGKJ4 (Fragment)		43231.1	121110	15964.8	178460	182980	135254	166386	182527	213902	325324	30936.4	24296.1	50651.1	7168.41	3080.59	11276.5	87327.2	27710.6	99956.4	191083	0.00599217	53348.6	58441	18480.7	109.545	156514	86947.7	27495.3	55.5527	2.93379	1.55277	0.0570645	Up
A0A5C2GL04		IG c915_heavy_IGHV4-34_IGHD4-11_IGHJ4 (Fragment)		250.019	33133.4	250.019	250.019	250.019	250.019	16161.6	250.019	250.019	250.019	22536	43937.2	19453.7	20906	58613.7	23574.6	45435.5	71609.4	250.019	250.019	0.00629322	30656.6	23662.7	7482.81	77.1863	5129.51	11037.3	3490.3	215.173	0.167322	-2.5793	0.0585738	Down
A0A5C2GL28		IG c26_heavy_IGHV3-7_IGHD6-13_IGHJ4 (Fragment)		822954	355593	450260	749749	328060	637458	472698	560666	465631	629528	1.06132e+06	10337.4	54567.8	90043.7	365252	190100	321824	357525	281834	223604	0.0304257	295641	297009	93922.4	100.463	547260	162791	51479.2	29.7466	1.8511	0.888381	0.143921	Up
A0A5C2GL81		IG c325_heavy_IGHV5-51_IGHD5-24_IGHJ4 (Fragment)		3.41798e+06	923875	950234	1.40906e+06	2.08032e+06	1.62885e+06	1.20906e+06	2.73892e+06	2741171	2.7063e+06	1.92722e+06	250.019	250.019	250.019	1.18581e+06	1.35591e+06	1.00818e+06	1.63888e+06	941731	464736	0.00542871	852321	707066	223594	82.9576	1.98058e+06	880664	278490	44.465	2.32374	1.21645	0.0534485	Up
A0A5C2GLB9		IG c824_light_IGLV1-44_IGLJ2 (Fragment)		497070	3.68823e+06	250.019	250.019	250.019	4719085	250.019	5.61611e+06	8158384	966640	250.019	250.019	250.019	250.019	541570	250.019	63273.1	250.019	2.05325e+06	250.019	0.0423716	265984	650270	205633	244.477	2.36465e+06	2.9672e+06	938311	125.481	8.8902	3.15222	0.173591	Up
A0A5C2GLD2		IG c747_light_IGKV3-15_IGKJ2 (Fragment)		2108773	2.00043e+06	193165	1.33316e+06	84204.9	1.59328e+06	2.0868e+06	42797	693079	957226	26679.3	387918	29578	968564	373401	58541.7	140139	1.76112e+06	40128.6	219664	0.0383944	400574	557723	176368	139.231	1.10929e+06	833789	263667	75.1641	2.76926	1.4695	0.164295	Up
A0A5C2GLF6		IG c1138_light_IGLV2-14_IGLJ1 (Fragment)		54940	250.019	250.019	250.019	12598.8	250.019	250.019	250.019	250.019	250.019	43710.8	250.019	250.019	179966	250.019	109770	250.019	250.019	341019	341230	0.0473911	101694	139707	44179.2	137.379	6953.9	17301.5	5471.21	248.803	0.0683803	-3.87028	0.185186	Down
A0A5C2GLG3		IG c1011_light_IGKV3-20_IGKJ5 (Fragment)		3.18604e+06	2456482	4059424	2.41095e+06	1.18156e+06	2408281	1.68194e+06	1.87855e+06	1.64301e+06	1.62073e+06	1.61574e+06	356934	1.43764e+06	226572	951159	3096974	1.38485e+06	532908	1.91721e+06	669236	0.0154127	1.21892e+06	870490	275273	71.4147	2.2527e+06	857021	271014	38.0442	1.84811	0.886047	0.104054	Up
A0A5C2GLJ1		IG c807_light_IGKV3-15_IGKJ4 (Fragment)		2.97152e+06	3.36346e+06	2.10379e+06	2202936	1.62207e+06	1.72103e+06	2166317	3.87596e+06	1.53848e+06	2.53509e+06	3.77727e+06	1.45937e+06	1727410	1.14333e+06	689955	460454	2.01937e+06	1.42556e+06	997786	1.40552e+06	0.0297972	1.5106e+06	921272	291332	60.9871	2.41007e+06	777471	245858	32.2593	1.59543	0.673949	0.143087	Up
A0A5C2GLM0		IG c402_heavy_IGHV3-21_IGHD3-10_IGHJ6 (Fragment)		1.72092e+06	3.10314e+06	1.85845e+06	380351	1.26008e+06	1.36165e+06	1.14195e+06	3.4273e+06	1.39189e+06	986477	802782	1.86367e+06	323782	1.01106e+06	333848	1.0087e+06	666253	597978	278657	727062	0.0141239	761379	469574	148492	61.6741	1.66322e+06	938636	296823	56.4348	2.18449	1.12729	0.0991497	Up
A0A5C2GLN1		IG c412_heavy_IGHV3-33_IGHD1-26_IGHJ3 (Fragment)		74687.7	162420	72341	250.019	88729.5	183134	66784.5	205471	92187.6	95596.5	67239	250.019	250.019	250.019	250.019	250.019	30716.2	13800.9	250.019	112987	0.00233598	22624.4	38446.1	12157.7	169.932	104160	61846.8	19557.7	59.3766	4.6039	2.20286	0.0326131	Up
A0A5C2GLP6		IG c465_heavy_IGHV3-49_IGHD3-22_IGHJ5 (Fragment)		250.019	250.019	250.019	250.019	250.019	250.019	250.019	250.019	250.019	250.019	250.019	250.019	21177.5	38516.6	44797	25844.1	250.019	81562.9	250.019	250.019	0.0253407	21314.8	27317.7	8638.61	128.163	250.019	0	0	0	0.0117298	-6.41367	0.129449	Down
A0A5C2GLR2		IG c1036_light_IGKV3-20_IGKJ4 (Fragment)		920528	2.41385e+06	796350	1.1208e+06	579730	1.10298e+06	1.30272e+06	785109	749735	911754	119979	245847	250.019	54655	47144.1	686642	6900.61	421406	1.50835e+06	72648.2	0.00323608	316382	472413	149390	149.317	1.06836e+06	517482	163642	48.4373	3.37679	1.75565	0.0391049	Up
A0A5C2GM09		IG c328_heavy_IGHV6-1_IGHD6-13_IGHJ4 (Fragment)		203211	250.019	250.019	39764.3	13531	250.019	120499	250.019	250.019	250.019	2.28743e+06	431041	1.946e+06	1.13765e+06	3.06356e+06	986878	4830054	10301126	81314.7	250.019	0.0221531	2.50653e+06	3.11771e+06	985906	124.383	37850.6	69324.4	21922.3	183.153	0.0151008	-6.04923	0.122524	Down
A0A5C2GM25		IG c155_light_IGKV3-20_IGKJ3 (Fragment)		2.87925e+06	2.97053e+06	2.35648e+06	3.04276e+06	4871505	2714604	3.86768e+06	2.37992e+06	3.45133e+06	3106547	2.75002e+06	658793	1.0457e+06	167709	1.87267e+06	1.23397e+06	123889	995316	2563104	3900610	0.00208087	1.53118e+06	1.22443e+06	387198	79.9664	3.16406e+06	752672	238016	23.7882	2.06642	1.04713	0.0313768	Up
A0A5C2GM54		IG c595_heavy_IGHV5-51_IGHD2-2_IGHJ4 (Fragment)		250.019	250.019	250.019	250.019	250.019	250.019	250.019	250.019	250.019	250.019	1.98395e+06	250.019	250.019	250.019	947995	517176	989484	865759	250.019	250.019	0.0218257	530561	667989	211237	125.902	250.019	0	0	0	0.000471236	-11.0513	0.121788	Down
A0A5C2GM85		IG c631_light_IGKV1-12_IGKJ1 (Fragment)		116557	105665	162389	114473	91613.1	106936	112217	173485	68098.2	64673.7	250.019	250.019	250.019	250.019	250.019	250.019	250.019	250.019	167283	79999	0.000594288	24928.2	55946.2	17691.7	224.429	111611	34949.9	11052.1	31.3141	4.47729	2.16262	0.0149927	Up
A0A5C2GM92		IG c871_light_IGKV3-20_IGKJ2 (Fragment)		1.08512e+06	1.91788e+06	80661.7	1584430	1.30421e+06	1.58408e+06	1.55683e+06	1.02736e+06	1.10385e+06	1.75734e+06	169534	50761.5	184138	14308.5	321836	416796	35888.3	375685	217033	90299.5	4.27806e-06	187628	144672	45749.3	77.1057	1.30018e+06	523268	165472	40.246	6.92954	2.79276	0.000985405	Up
A0A5C2GMA5		IG c582_heavy_IGHV3-74_IGHD3-16_IGHJ5 (Fragment)		2.50251e+06	1843657	743741	865528	1.89847e+06	940777	635493	3.70626e+06	1.74118e+06	1452128	546745	412412	1000.03	1840.6	531127	836910	577219	536363	212626	260955	0.00086268	391720	269003	85066.2	68.6723	1.63298e+06	946791	299402	57.9795	4.16873	2.05961	0.0178014	Up
A0A5C2GMI6		IG c566_heavy_IGHV4-34_IGHD2-2_IGHJ5 (Fragment)		71410	1553.35	39152.6	58724.5	28712.7	42319	36690.1	42714.1	55794.3	250.019	250.019	250.019	250.019	250.019	16081.2	250.019	48110.4	250.019	250.019	250.019	0.00224618	6619.18	15404.1	4871.21	232.719	37732.1	22961.9	7261.19	60.8552	5.70041	2.51107	0.0321031	Up
A0A5C2GMI7		IG c992_light_IGKV4-1_IGKJ4 (Fragment)		250.019	250.019	250.019	250.019	250.019	250.019	250.019	250.019	250.019	68830.3	98792.5	164523	533599	311912	77515.9	536676	1807.73	250.019	250.019	250.019	0.0261166	172558	214765	67914.7	124.46	7108.04	21687	6858.03	305.105	0.0411923	-4.60148	0.132006	Down
A0A5C2GML1		IG c428_heavy_IGHV3-72_IGHD3-3_IGHJ6 (Fragment)		250.019	37917	250.019	19407.2	97524.8	250.019	30794	9810.19	19112.6	93298	14212.2	5620.22	18617	250.019	250.019	8196.98	250.019	968.096	250.019	11509.1	0.0479216	6012.36	6827.37	2159	113.556	30861.4	36386.3	11506.4	117.902	5.13299	2.3598	0.187005	Up
A0A5C2GMQ3		IG c581_heavy_IGHV3-21_IGHD3-16_IGHJ4 (Fragment)		2.39408e+06	1.72506e+06	1766649	940994	1.29682e+06	1.49125e+06	1.93584e+06	2.90111e+06	1.57152e+06	2.14713e+06	1.72573e+06	920154	643326	689477	1.50806e+06	908109	1.19536e+06	1.48773e+06	1.38039e+06	851484	0.00498108	1.13098e+06	379254	119931	33.5332	1.81705e+06	562411	177850	30.952	1.60661	0.684018	0.0508	Up
A0A5C2GMU3		IG c765_heavy_IGHV3-74_IGHD2-21_IGHJ3 (Fragment)		547337	35365.1	19071.4	124078	24584.5	53693.9	39943.4	339044	568082	96880.2	354710	379079	575332	539059	508447	1.31439e+06	423043	532068	332880	159615	0.0134709	511862	308323	97500.2	60.2355	184808	217864	68894.8	117.887	0.36105	-1.46973	0.0966143	Down
A0A5C2GMX7		IG c213_heavy_IGHV3-74_IGHD1-1_IGHJ3 (Fragment)		983155	775715	943591	835453	1.32213e+06	727812	519586	1.42176e+06	563757	565688	9041.12	705073	71267.4	431525	18965.8	782216	13902	121336	715399	391031	0.00121426	325976	319329	100981	97.961	865865	310268	98115.2	35.8333	2.65623	1.40938	0.0218724	Up
A0A5C2GN22		IG c180_light_IGKV3-20_IGKJ3 (Fragment)		250.019	1.98936e+06	14338416	3.27637e+06	3.44552e+06	18767096	19888800	13144589	15046145	18854474	198084	2.43328e+06	1.62219e+06	4950870	1.8467e+06	1.61492e+06	11077539	9384526	567646	774039	0.0148192	3.44698e+06	3.82981e+06	1.21109e+06	111.106	1.08751e+07	7.83086e+06	2.47634e+06	72.0073	3.15497	1.65762	0.102452	Up
A0A5C2GN30		IG c862_heavy_IGHV3-9_IGHD2-21_IGHJ3 (Fragment)		250.019	6305.38	250.019	137379	13956.3	24925.5	250.019	250.019	7622.26	250.019	250.019	540701	225853	471608	37493.2	188242	250.019	66906.1	9976.39	33318.3	0.0464372	157460	200103	63278.2	127.082	19143.8	42324.5	13384.2	221.087	0.121579	-3.04003	0.183201	Down
A0A5C2GN85		IG c1200_light_IGKV2D-28_IGKJ5 (Fragment)		2.0918e+06	986185	1.68839e+06	902753	250.019	250.019	1.26499e+06	2.38321e+06	420756	250.019	7265159	6.61983e+06	5.00362e+06	4729170	5.83513e+06	6135794	4976310	4.95162e+06	840550	674704	0.000113	4.70319e+06	2.23474e+06	706688	47.5155	973884	881051	278613	90.4678	0.207069	-2.27182	0.00673584	Down
A0A5C2GNA0		IG c796_heavy_IGHV3-33_IGHD4-17_IGHJ4 (Fragment)		2.06839e+06	158001	255612	294906	445129	1.53555e+06	1049944	805966	1.01115e+06	1.37007e+06	250.019	250.019	250.019	250.019	250.019	23238.1	250.019	250.019	849333	415215	0.00241942	128954	284414	89939.5	220.555	899473	630041	199236	70.0455	6.97516	2.80223	0.0329775	Up
A0A5C2GNJ8		IG c507_light_IGKV1-16_IGKJ1 (Fragment)		29326.2	48791.4	28159.1	11103.6	48455.1	50136	9966.15	105894	233424	250.019	3769.9	250.019	6695.64	250.019	250.019	12535.1	250.019	8748.53	41343	250.019	0.0399653	7434.23	12691.2	4013.3	170.713	56550.6	68991.4	21817	121.999	7.60678	2.92729	0.168041	Up
A0A5C2GNK8		IG c120_heavy_IGHV1-8_IGHD1-7_IGHJ6 (Fragment)		60965.2	13661.7	250.019	59535.9	250.019	250.019	15375.9	12709.7	72789.5	250.019	250.019	250.019	250.019	250.019	250.019	250.019	250.019	250.019	29085.7	250.019	0.0473309	3133.59	9118.64	2883.57	290.997	23603.8	29007.7	9173.05	122.894	7.53251	2.91313	0.185186	Up
A0A5C2GNM5		IG c1072_heavy_IGHV3-33_IGHD3-3_IGHJ4 (Fragment)		87757.3	172617	33783.8	73682	239023	152574	102937	100510	127359	85567.3	40172.2	125807	187563	41082	12853.6	31112.5	10234.4	38983.1	30394.4	56877	0.0301437	57508	55930.2	17686.7	97.2565	117581	58182.1	18398.8	49.4826	2.0446	1.03182	0.143713	Up
A0A5C2GNS1		IG c463_heavy_IGHV3-49_IGHD3-10_IGHJ5 (Fragment)		19657.6	178686	60951.8	12377679	3.22164e+06	2.65319e+06	250.019	2807896	12030882	1.60477e+06	13679.4	126011	35068.5	43349.3	94444.2	250.019	250.019	250.019	6152.41	35161.4	0.0336294	35461.6	43196.7	13660	121.813	3.49556e+06	4.75714e+06	1.50434e+06	136.091	98.5731	6.62312	0.15218	Up
A0A5C2GNS8		IG c400_heavy_IGHV3-49_IGHD5-18_IGHJ4 (Fragment)		250.019	250.019	250.019	250.019	250.019	250.019	250.019	250.019	250.019	250.019	24315.5	5214.18	2385.78	3234.07	40016.2	9623.11	250.019	5620.66	250.019	250.019	0.0453227	9115.96	13035.2	4122.11	142.994	250.019	0	0	0	0.0274265	-5.18828	0.181039	Down
A0A5C2GNV1		IG c541_heavy_IGHV3-53_IGHD6-13_IGHJ6 (Fragment)		216715	748449	250.019	185585	235827	66997.8	63171.8	173658	281943	321621	2.5209e+06	482199	411132	1.30893e+06	353859	1.44125e+06	2567108	1.18011e+06	107312	250.019	0.0159316	1.0373e+06	937277	296393	90.357	229422	208812	66032.2	91.0167	0.221171	-2.17676	0.105366	Down
A0A5C2GP13		IG c38_heavy_IGHV3-74_IGHD2-15_IGHJ4 (Fragment)		1.15148e+06	579626	886534	707812	671964	491950	353107	522212	623152	610644	34364.1	51830.8	120108	123427	90166.9	137933	81490.8	71237.8	306108	365289	3.1231e-06	138196	109826	34730.2	79.4718	659848	222850	70471.3	33.7729	4.77474	2.25542	0.000985405	Up
A0A5C2GP53		IG c464_heavy_IGHV3-30_IGHD3-3_IGHJ4 (Fragment)		2.86469e+06	157643	2.17301e+06	3071499	2874315	986324	1.20954e+06	2439850	15534939	14348549	250.019	2.64075e+06	503612	216915	545535	14606.9	1.27183e+06	426696	368320	584111	0.040852	657263	783766	247849	119.247	4.56604e+06	5.55544e+06	1.75678e+06	121.669	6.94704	2.7964	0.170523	Up
A0A5C2GPA5		IG c1078_heavy_IGHV3-23_IGHD4-17_IGHJ4 (Fragment)		123683	206967	225729	82373.8	143223	151128	250.019	321571	89123.1	21679	193377	250.019	250.019	28689.3	114539	8892.77	250.019	19692.4	108024	39227.5	0.0333405	51319.3	65553.6	20729.9	127.737	136573	96910.2	30645.7	70.9587	2.66124	1.4121	0.151872	Up
A0A5C2GPD5		IG c430_heavy_IGHV3-23_IGHD4-17_IGHJ2 (Fragment)		869303	794380	618829	408478	457404	656676	339085	685917	346748	612695	271455	45972.8	42738.5	48753	49864.3	276841	159096	53492.4	98173.5	83460.6	1.17223e-06	112985	92046.7	29107.7	81.4683	578952	184456	58330	31.8603	5.12416	2.35732	0.0007244	Up
A0A5C2GPI3		IG c1292_heavy_IGHV3-30_IGHD1-7_IGHJ6 (Fragment)		1.42186e+06	1.81029e+06	361529	250.019	1.92204e+06	97850.4	1.24258e+06	93563	965102	2.0893e+06	287550	250.019	2999.16	250.019	24869.9	250.019	4700.92	640621	1.20445e+06	826330	0.0276305	299227	438670	138720	146.601	1.00044e+06	814725	257639	81.4369	3.3434	1.74132	0.136373	Up
A0A5C2GPR1		IG c684_heavy_IGHV1-24_IGHD1-14_IGHJ4 (Fragment)		102683	120552	72246.5	191970	104899	139849	234234	119683	191033	150350	250.019	250.019	6039.78	9452.88	250.019	250.019	8346.93	53379.8	198168	250.019	0.000233449	27663.7	62060	19625.1	224.337	142750	49691.2	15713.7	34.81	5.16018	2.36742	0.00959142	Up
A0A5C2GPU9		IG c1228_heavy_IGHV3-33_IGHD1-1_IGHJ4 (Fragment)		114316	350769	62896.1	167587	295094	120613	108460	104547	226396	321900	82251.4	1072.13	250.019	19514.2	79451.8	52984.3	89388.8	10748.2	19711.4	122038	0.000986379	47741	43285.7	13688.1	90.6677	187258	103650	32777	55.3514	3.92237	1.97173	0.0191298	Up
A0A5C2GPV8		IG c1238_heavy_IGHV2-26_IGHD4-17_IGHJ4 (Fragment)		250.019	250.019	250.019	250.019	250.019	250.019	250.019	250.019	250.019	250.019	5063.69	18175.8	17308	5367.57	250.019	19746.4	9693.97	10646.9	250.019	250.019	0.00270598	8675.24	7668.26	2424.92	88.3924	250.019	0	0	0	0.0288199	-5.11679	0.0352145	Down
A0A5C2GPW8		IG c1212_light_IGKV3-20_IGKJ2 (Fragment)		250.019	51105132	25538236	42733564	15383704	47389900	57170428	11712565	47945932	43162984	174187168	136973168	77625896	81155344	175205728	99798800	154821024	169736016	42300104	43218696	0.000252854	1.15502e+08	5.31257e+07	1.67998e+07	45.9954	3.42143e+07	1.95331e+07	6.17692e+06	57.0906	0.296222	-1.75525	0.00982715	Down
A0A5C2GQE5		IG c1123_heavy_IGHV3-30_IGHD4-17_IGHJ4 (Fragment)		731567	319590	311746	356877	319338	654508	738787	217576	119474	534176	310973	250.019	250.019	117927	203720	297423	354216	277644	201782	294237	0.0118913	205842	127676	40374.6	62.026	430364	219308	69351.4	50.9588	2.09075	1.06402	0.0889232	Up
A0A5C2GQG7		IG c1636_heavy_IGHV4-34_IGHD3-10_IGHJ6 (Fragment)		250.019	119263	29922.7	25405.8	250.019	41281.5	250.019	250.019	112186	250.019	271604	198609	749617	525564	182041	393011	387942	646844	250.019	250.019	0.00162564	335573	254245	80399.4	75.7645	32931	46200.4	14609.9	140.295	0.0981336	-3.34911	0.0265771	Down
A0A5C2GQX0		IG c1608_heavy_IGHV3-33_IGHD3-9_IGHJ4 (Fragment)		250.019	157713	250.019	250.019	354512	173362	205091	250.019	156547	271437	250.019	250.019	250.019	250.019	250.019	250.019	181667	250.019	149606	250.019	0.0461852	33327.3	70141.3	22180.6	210.462	131966	127673	40373.7	96.7467	3.9597	1.98539	0.182708	Up
A0A5C2GQY4		IG c950_heavy_IGHV4-39_IGHD2-2_IGHJ5 (Fragment)		4420	250.019	250.019	250.019	14311	250.019	250.019	250.019	24801.4	250.019	47485	15605.7	250.019	64841	31689.9	250.019	23567.8	37070.2	75643.5	250.019	0.0115429	29665.3	26994.7	8536.47	90.9975	4528.26	8398.67	2655.89	185.472	0.152645	-2.71175	0.0879947	Down
A0A5C2GR40		IG c1668_heavy_IGHV1-69_IGHD3-3_IGHJ4 (Fragment)		68943.6	250.019	188884	250.019	250.019	250.019	177383	74727.5	95617.8	159028	250.019	250.019	250.019	250.019	250.019	250.019	250.019	250.019	250.019	250.019	0.00571526	250.019	0	0	0	76558.4	76956.3	24335.7	100.52	306.21	8.25838	0.0549735	Up
A0A5C2GR43		IG c1000_heavy_IGHV3-33_IGHD1-20_IGHJ4 (Fragment)		91644.1	109367	250.019	96275.8	91416.2	15666.4	34134.3	45561.6	12490.2	177046	250.019	250.019	250.019	250.019	250.019	250.019	250.019	250.019	35663.2	12434	0.00261174	5009.73	11430.9	3614.77	228.174	67385.2	55343.4	17501.1	82.1299	13.4509	3.74963	0.0346146	Up
A0A5C2GRC6		IG c15_light_IGKV3D-15_IGKJ1 (Fragment)		164910	47361.1	191209	48376.6	60022.6	35140.8	82258.8	106645	145841	59227.1	250.019	250.019	250.019	5466	250.019	250.019	3652.24	250.019	95866.6	134262	0.00767394	24074.7	48835.6	15443.2	202.851	94099.2	55325	17495.3	58.7943	3.90864	1.96667	0.0669525	Up
A0A5C2GRD1		IG c1274_heavy_IGHV3-33_IGHD6-19_IGHJ4 (Fragment)		295770	98919.3	789008	1.03506e+06	1.16266e+06	363967	1.15998e+06	570464	1.11852e+06	564234	6219.73	10914.6	323020	70481.7	533641	6987.11	200043	17574.7	94910.4	282390	0.000652695	154618	177732	56203.9	114.949	715858	393178	124334	54.924	4.62984	2.21096	0.0158068	Up
A0A5C2GRK2		IG c7_light_IGKV3-20_IGKJ5 (Fragment)		300606	507124	1.18374e+06	21011.4	26210.1	265859	422747	613267	454416	78805.8	8211	248479	75983.6	259903	90803.7	278053	32554.8	31286.9	63133.4	89557.3	0.030324	117797	103267	32655.7	87.6652	387378	347607	109923	89.7332	3.28854	1.71745	0.143766	Up
A0A5C2GRM8		IG c1364_heavy_IGHV3-66_IGHD3-3_IGHJ4 (Fragment)		47169.2	6504.33	250.019	250.019	42317	8466.46	9459.25	79473.4	7636.33	250.019	35787	165164	88440.1	477123	29350.8	460710	250.019	250.019	5704.59	167379	0.0498346	143016	182774	57798.2	127.8	20177.6	26920.2	8512.93	133.416	0.141087	-2.82535	0.191147	Down
A0A5C2GRT1		IG c1918_heavy_IGHV5-51_IGHD4-17_IGHJ4 (Fragment)		250.019	250.019	250.019	250.019	250.019	250.019	250.019	250.019	250.019	250.019	120147	250.019	8277.06	53526.5	250.019	53202.9	10966.5	29309.8	250.019	250.019	0.0384459	27642.9	38783.8	12264.5	140.303	250.019	0	0	0	0.0090446	-6.78873	0.164295	Down
A0A5C2GRT6		IG c1424_heavy_IGHV3-64_IGHD2-21_IGHJ4 (Fragment)		2.01627e+06	1.89813e+06	1.77096e+06	2.2679e+06	1.08847e+06	2.2209e+06	1.60406e+06	2.72728e+06	85575.7	2.07239e+06	216012	66928.5	206198	95072.1	242237	733351	228926	580854	367071	3.41197e+06	0.0086176	614862	1.00469e+06	317712	163.402	1.77519e+06	735236	232502	41.4172	2.88714	1.52964	0.0733261	Up
A0A5C2GRV9		IG c215_light_IGKV1-27_IGKJ1 (Fragment)		1.44828e+06	1.0718e+06	582336	838913	2.3196e+06	2700229	1.30569e+06	1.89032e+06	3.09805e+06	2.98566e+06	925313	250.019	250.019	445424	690362	250.019	447081	574640	879884	1477008	0.000975954	544046	478096	151187	87.8779	1.82409e+06	911542	288255	49.9725	3.35282	1.74537	0.0191298	Up
A0A5C2GRW3		IG c410_light_IGKV3-20_IGKJ3 (Fragment)		144789	250.019	250.019	250.019	250.019	250.019	250.019	250.019	250.019	250.019	792484	575042	869974	250.019	649294	69003.3	751141	687912	250.019	250.019	0.00213009	439560	372262	117720	84.6896	14703.9	45707.3	14453.9	310.851	0.0334515	-4.90179	0.0313768	Down
A0A5C2GRZ5		IG c294_light_IGKV1-12_IGKJ5 (Fragment)		1.75332e+06	635066	687173	861956	1.12688e+06	601625	964079	706901	707059	561549	19181.8	429382	185066	198733	1.04701e+06	6867.44	686153	593632	366344	236244	0.0054379	376861	324505	102618	86.1074	860561	359507	113686	41.7759	2.2835	1.19124	0.0534485	Up
A0A5C2GSB8		IG c271_light_IGLV1-40_IGLJ2 (Fragment)		180322	1.66473e+06	1.16119e+06	1.80697e+06	1.07138e+06	599472	465538	4.24277e+06	423854	252601	16611.8	250.019	167235	272672	524319	250.019	250.019	64928.7	103462	46042.2	0.0131562	119602	167165	52862.2	139.768	1.18688e+06	1.21559e+06	384403	102.419	9.9236	3.31086	0.0950685	Up
A0A5C2GSC5		IG c395_light_IGLV3-19_IGLJ1 (Fragment)		682616	873546	619927	511433	465824	1.058e+06	705505	982236	631806	500977	250.019	250.019	250.019	250.019	250.019	250.019	80296	62867.9	1.02955e+06	471334	0.000415023	164555	336938	106549	204.757	703187	205275	64913.7	29.1921	4.27327	2.09534	0.0130063	Up
A0A5C2GSH7		IG c463_light_IGKV3-11_IGKJ4 (Fragment)		1.67751e+06	1.38218e+06	1818828	2.43682e+06	2.42413e+06	1.46737e+06	1.5094e+06	1.59086e+06	2.86672e+06	1.86632e+06	6864007	3.37266e+06	2.39186e+06	4.03912e+06	10336633	4134439	5717253	4507113	1.20994e+06	1.10334e+06	0.0128589	4.36764e+06	2.77658e+06	878030	63.5716	1.90401e+06	500883	158393	26.3067	0.435937	-1.19781	0.0933897	Down
A0A5C2GSJ3		IG c1460_heavy_IGHV1-69_IGHD1-26_IGHJ6 (Fragment)		286835	240061	200800	261558	247461	74135.7	216230	424252	35277.1	188322	250.019	250.019	250.019	250.019	250.019	68232.6	9333.33	250.019	250.019	396400	0.00438201	47571.6	124385	39334.1	261.47	217493	108419	34285	49.8493	4.57191	2.1928	0.04685	Up
A0A5C2GSX9		IG c122_light_IGKV3-20_IGKJ1 (Fragment)		612028	27767.2	250.019	493919	749841	16202.2	525589	73621.5	84979.5	64298.5	155008	250.019	250.019	55589	31876.3	9847.21	26478.9	43929.3	66586.1	73945.1	0.0317731	46376	46255.2	14627.2	99.7397	264850	293143	92700	110.683	5.71092	2.51372	0.146752	Up
A0A5C2GT18		IG c561_light_IGKV3-11_IGKJ4 (Fragment)		10209.8	86901.2	340842	327804	1.71479e+06	173030	418490	258331	472703	390700	32053.3	250.019	250.019	1295.64	14605.7	250.019	34295.2	7403.46	75023.6	429845	0.0341699	59527.2	132260	41824.2	222.184	419380	478527	151324	114.103	7.04518	2.81664	0.153791	Up
A0A5C2GT39		IG c1660_heavy_IGHV4-34_IGHD5-5_IGHJ6 (Fragment)		2.36265e+06	5655235	3.29335e+06	4362593	2.89923e+06	4830689	2.23348e+06	1.1907e+06	2.66178e+06	2.04992e+06	6.54755e+06	6837405	7907707	9534511	7.68748e+06	15637803	8234406	12507627	2302474	2367743	0.00237038	7.95647e+06	4.06608e+06	1.28581e+06	51.104	3.15396e+06	1.39052e+06	439721	44.088	0.396402	-1.33496	0.0327751	Down
A0A5C2GT47		IG c517_light_IGKV3-15_IGKJ1 (Fragment)		2.75923e+06	6.08559e+06	4.62644e+06	5.34362e+06	2.96656e+06	3.00117e+06	6.30871e+06	4215284	6491024	2.77262e+06	2.46536e+06	718063	1.21849e+06	866926	1.6226e+06	1.20296e+06	684250	84152.1	1724556	1.41288e+06	8.02722e-06	1.20002e+06	662894	209626	55.2401	4.45702e+06	1.53304e+06	484791	34.3962	3.71411	1.89302	0.00128257	Up
A0A5C2GT62		IG c1690_heavy_IGHV3-21_IGHD5-18_IGHJ6 (Fragment)		1.42685e+06	1.4252e+06	1.12778e+06	1205363	1.02087e+06	1.01266e+06	1.0305e+06	989723	925314	1805005	937795	653121	519578	593616	924739	532042	1.09556e+06	608730	790985	788625	0.000507517	744479	195071	61686.9	26.2024	1.19693e+06	276674	87492	23.1153	1.60774	0.685034	0.0142805	Up
A0A5C2GT63		IG c537_light_IGLV1-44_IGLJ3 (Fragment)		2274858	445996	171223	578547	1.15002e+06	632675	743314	1.43628e+06	1.33308e+06	1.56928e+06	250.019	341476	45996.3	52757.7	250.019	506106	387479	470711	820190	396105	0.00359655	302132	272056	86031.6	90.0453	1.03353e+06	635446	200946	61.4832	3.42078	1.77433	0.0418772	Up
A0A5C2GTC6		IG c1089_heavy_IGHV3-7_IGHD5-24_IGHJ6 (Fragment)		82935.3	82865.6	41709.4	165184	91118.9	116769	105377	63101.3	98296.3	162052	250.019	250.019	250.019	250.019	7342.35	250.019	250.019	250.019	148072	102042	0.00213572	25920.7	53409.8	16889.7	206.051	100941	39195.5	12394.7	38.8302	3.89422	1.96134	0.0313768	Up
A0A5C2GTE2		IG c617_light_IGKV3-15_IGKJ5 (Fragment)		12016234	5753308	12678255	6533681	5.21778e+06	7498398	6.90082e+06	5.76123e+06	7.22237e+06	5.28248e+06	5362662	1.01095e+06	5561267	783995	3.17917e+06	3.61871e+06	4.12342e+06	3.77473e+06	3.57049e+06	4.90833e+06	0.000984486	3.58937e+06	1.62549e+06	514026	45.2863	7.48645e+06	2.68285e+06	848390	35.836	2.08573	1.06055	0.0191298	Up
A0A5C2GTF2		IG c1780_heavy_IGHV4-39_IGHD3-3_IGHJ3 (Fragment)		152900	250.019	900670	783767	250.019	162407	487193	180641	87504.5	57029.4	250.019	250.019	342252	250.019	250.019	250.019	250.019	250.019	250.019	250.019	0.0362202	34450.2	108150	34200.2	313.933	281261	327460	103552	116.426	8.16428	3.02933	0.159037	Up
A0A5C2GTI7		IG c800_light_IGLV3-27_IGLJ2 (Fragment)		1.00489e+06	250.019	867865	616144	692036	250.019	317456	1.64232e+06	606469	661001	731313	1.12194e+06	1.10003e+06	1.45351e+06	1584006	1.42492e+06	2643663	1.61973e+06	667425	275831	0.0267772	1.26224e+06	654676	207027	51.8663	640869	485014	153375	75.6807	0.507724	-0.977882	0.134635	Down
A0A5C2GTJ5		IG c794_light_IGKV3-20_IGKJ2 (Fragment)		2010659	3.66089e+06	1.95984e+06	3.64277e+06	6.14227e+06	3366862	4672941	3.04274e+06	4.3599e+06	3.92786e+06	4.56891e+06	1.23074e+06	1.11377e+06	1.82892e+06	2216338	336490	917899	1.5315e+06	3204481	4.89158e+06	0.0286025	2.18406e+06	1.55218e+06	490844	71.0686	3.67867e+06	1.23935e+06	391918	33.6902	1.68433	0.752172	0.139149	Up
A0A5C2GTP1		IG c1075_light_IGKV3-20_IGKJ2 (Fragment)		171723	250.019	12436.9	250.019	2737.72	250.019	102862	73100.5	73766.8	31950.6	3209.26	250.019	250.019	250.019	250.019	25336.2	250.019	250.019	1992.39	40663.2	0.0490906	7270.12	14069.3	4449.12	193.523	46932.8	57745.6	18260.8	123.039	6.45557	2.69054	0.18951	Up
A0A5C2GTP5		IG c1229_heavy_IGHV3-21_IGHD6-19_IGHJ6 (Fragment)		696572	402159	520003	444465	857927	757500	823939	1.00337e+06	896662	967278	1136548	237308	36465.1	111692	375000	250.019	21862.4	357841	215696	322036	0.0018623	281470	331494	104828	117.772	736988	215637	68190.5	29.2593	2.61835	1.38866	0.0292676	Up
A0A5C2GTP6		IG c123_light_IGKV3-20_IGKJ2 (Fragment)		250.019	250.019	250.019	250.019	250.019	250.019	250.019	250.019	32146.6	250.019	41531.6	63087.9	250.019	250.019	37260.6	250.019	69181	17906.8	250.019	250.019	0.0499614	23021.8	27689.2	8756.11	120.274	3439.68	10086.6	3189.66	293.242	0.14941	-2.74266	0.191147	Down
A0A5C2GTQ8		IG c1249_heavy_IGHV3-49_IGHD6-6_IGHJ6 (Fragment)		613932	812998	402035	1029919	80144	722029	12798.9	493764	396689	490158	250.019	73826.3	36820.7	110048	250.019	250.019	250.019	250.019	521692	1.05234e+06	0.0400341	179598	345760	109339	192.519	505447	311771	98590.8	61.6823	2.81433	1.49279	0.168085	Up
A0A5C2GTT4		IG c9_light_IGKV1-12_IGKJ1 (Fragment)		81619.2	21142.8	210348	16224.5	49222.3	97758.8	180880	108256	165472	83025.2	13231.4	17659.4	70431.6	9712.61	15741	250.019	3310.98	10817.4	26323.6	36361.2	0.00165953	20383.9	20487.7	6478.78	100.509	101395	66248.5	20949.6	65.3371	4.97426	2.31448	0.0265771	Up
A0A5C2GTV7		IG c148_light_IGKV1-5_IGKJ2 (Fragment)		2.1281e+06	700925	1.22354e+06	1700540	2.35577e+06	679825	834053	130413	791242	1.18824e+06	23689.2	311720	14866.7	404586	4731.03	250.019	915.63	603031	943814	631249	0.00218205	293885	341709	108058	116.273	1.17327e+06	699677	221257	59.635	3.99226	1.9972	0.0315356	Up
A0A5C2GTX7		IG c951_heavy_IGHV3-30_IGHD3-22_IGHJ6 (Fragment)		250.019	250.019	250.019	250.019	250.019	250.019	250.019	250.019	250.019	250.019	190040	1.23282e+06	1.11821e+06	1.79995e+06	51759.9	3.6145e+06	87726	141893	250.019	56590.7	0.0375024	829375	1.16742e+06	369172	140.76	250.019	0	0	0	0.000301455	-11.6958	0.162191	Down
A0A5C2GTZ2		IG c1163_light_IGKV2D-28_IGKJ3 (Fragment)		212530	459390	183417	274843	376271	405396	299955	180238	323144	219605	486811	753183	357166	550536	288983	646178	490834	311048	187479	334574	0.0326223	440679	175992	55653.7	39.9366	293479	97252.8	30754	33.1379	0.66597	-0.586471	0.149584	Down
A0A5C2GU54		IG c1409_heavy_IGHV4-39_IGHD3-3_IGHJ4 (Fragment)		3.57712e+06	7563113	4997431	5.82233e+06	4.3929e+06	5648074	3.39013e+06	2.37689e+06	3.144e+06	3.99424e+06	9944408	11324755	11989016	15019760	11668557	24157980	12486693	18976220	3.49323e+06	4.46666e+06	0.000978026	1.23527e+07	6.13282e+06	1.93937e+06	49.6475	4.49062e+06	1.54175e+06	487544	34.3327	0.363533	-1.45984	0.0191298	Down
A0A5C2GU60		IG c37_heavy_IGHV3-11_IGHD5-24_IGHJ5 (Fragment)		40914.9	37999.6	250.019	250.019	250.019	37371.2	250.019	12492.2	250.019	250.019	17884.5	53610.8	145785	42970.7	60899.6	40197.9	250.019	250.019	75295.7	216237	0.0299488	65338.1	67787	21436.1	103.748	13027.8	18177.5	5748.23	139.529	0.19939	-2.32633	0.143282	Down
A0A5C2GU81		IG c867_light_IGKV3-15_IGKJ2 (Fragment)		231656	214565	343295	923399	43958	328487	466567	284323	122555	58246.7	15404.2	40775.8	250.019	5855.08	11226	73619	250.019	250.019	217160	413247	0.0247389	77803.7	135350	42801.6	173.964	301705	255328	80741.9	84.6284	3.87777	1.95523	0.127736	Up
A0A5C2GUD9		IG c1125_light_IGKV1D-17_IGKJ1 (Fragment)		405882	429391	397522	426958	212475	307244	516541	587259	364936	677978	172172	47613.7	69096.7	250.019	47379.6	250.019	47200.2	63144.5	475183	250.019	3.35604e-05	92254	143696	45440.5	155.761	432619	134127	42414.7	31.0035	4.68943	2.22941	0.00332827	Up
A0A5C2GUF6		IG c1145_light_IGLV3-21_IGLJ3 (Fragment)		182598	237518	183448	25660.2	250.019	37619.8	250.019	292265	250.019	91495.9	250.019	250.019	250.019	250.019	250.019	45479.8	250.019	250.019	5103.38	250.019	0.0106396	5258.33	14214.4	4495	270.322	105136	109919	34759.4	104.55	19.9941	4.3215	0.0843436	Up
A0A5C2GUJ7		IG c269_light_IGKV1-5_IGKJ1 (Fragment)		1.71964e+06	38789.2	2.43259e+06	862085	15075.8	120505	204515	1681135	1.85495e+06	1534847	250.019	250.019	250.019	250.019	250.019	250.019	250.019	250.019	1.15235e+06	429683	0.0101631	158403	374406	118398	236.363	1.04641e+06	903631	285753	86.355	6.60601	2.72378	0.0821041	Up
A0A5C2GUQ8		IG c503_light_IGKV3-20_IGKJ3 (Fragment)		1.03721e+06	120069	629300	1.26291e+06	561466	140739	1.53869e+06	1.46354e+06	343025	2.31048e+06	148640	279368	253477	83683.4	152175	54653.1	532129	879923	597100	86708.1	0.0168135	306786	274436	86784.3	89.4553	940742	709598	224394	75.4295	3.06645	1.61657	0.108261	Up
A0A5C2GUV4		IG c553_light_IGKV3-20_IGKJ2 (Fragment)		27080.9	31202.9	39370.1	82578	18184.4	14880.3	250.019	12661.5	41365.6	28582.3	123258	41114.7	250.019	7870.04	231952	450052	236067	201371	479801	140303	0.00742973	191204	167954	53111.6	87.8401	29615.6	22474.2	7106.98	75.8864	0.15489	-2.69068	0.0661545	Down
A0A5C2GUW3		IG c1221_light_IGKV1-27_IGKJ1 (Fragment)		121711	10562.6	27633.9	64607.1	91407.8	10820.2	102050	163651	104682	174556	250.019	7093.6	9411.06	4733.17	92944.1	250.019	250.019	12819.6	131782	85001.6	0.0428426	34453.5	49086.8	15522.6	142.473	87168.1	58667.1	18552.2	67.3034	2.53002	1.33915	0.174773	Up
A0A5C2GV13		IG c1301_light_IGKV4-1_IGKJ2 (Fragment)		449370	489110	319419	285298	707367	94179.6	257480	192124	404833	412170	250.019	196139	250.019	250.019	250.019	250.019	250.019	139191	429438	424624	0.00612945	119089	176618	55851.5	148.307	361135	172117	54428.3	47.6601	3.03247	1.6005	0.0577977	Up
A0A5C2GV36		IG c1177_light_IGKV3-20_IGKJ4 (Fragment)		1.44376e+06	2531355	3.82931e+06	1.76909e+06	953136	773413	2190173	1.95087e+06	2.42339e+06	1.45632e+06	730175	579125	448879	289880	1.19732e+06	135299	1089862	602644	2.7541e+06	1422796	0.0138174	925008	760843	240600	82.2526	1.93208e+06	885637	280063	45.8385	2.08872	1.06262	0.0981209	Up
A0A5C2GV43		IG c732_light_IGKV1-12_IGKJ5 (Fragment)		894286	412073	467784	319284	430293	271068	327113	248516	394815	259977	4378.35	250.019	250.019	11690.1	250.019	250.019	250.019	250.019	393029	604299	0.00376832	101490	215201	68052.6	212.042	402521	188840	59716.5	46.9144	3.96612	1.98773	0.0426681	Up
A0A5C2GV70		IG c1217_light_IGKV3-15_IGKJ4 (Fragment)		3.03058e+06	5666789	6.39618e+06	6705579	5973311	6678353	6.78752e+06	11975126	4885738	6.55323e+06	3.30158e+06	138770	3.83402e+06	4.69867e+06	136514	1.71295e+06	3.25319e+06	2169333	4.85948e+06	3841939	0.000664939	2.79465e+06	1.70664e+06	539687	61.0683	6.46524e+06	2.25462e+06	712972	34.8729	2.31344	1.21004	0.0158068	Up
A0A5C2GV75		IG c1361_heavy_IGHV3-7_IGHD3-3_IGHJ4 (Fragment)		30053.3	250.019	14028.2	250.019	28519.9	250.019	250.019	250.019	250.019	190806	5140.58	591886	112587	822120	250.019	538836	56437	82605.5	373623	250.019	0.0276236	258374	300239	94943.9	116.204	26490.7	58975.5	18649.7	222.627	0.102529	-3.2859	0.136373	Down
A0A5C2GV99		IG c1391_heavy_IGHV1-2_IGHD3-3_IGHJ4 (Fragment)		313536	227602	113983	222409	504504	138472	113584	326564	312235	303284	250.019	250.019	250.019	250.019	250.019	250.019	250.019	250.019	310211	239882	0.00130188	55209.3	117044	37012.6	212.001	257617	120929	38241.2	46.9414	4.6662	2.22225	0.0228376	Up
A0A5C2GVA5		IG c1421_light_IGKV1-27_IGKJ4 (Fragment)		2.69177e+06	1.30557e+06	1.40195e+06	4.05919e+06	3.43947e+06	1.19365e+06	2.33898e+06	5.01086e+06	2.0801e+06	2911180	497610	390472	163562	564995	1.26119e+06	346173	729382	4712456	484721	1.47269e+06	0.0141347	1.06232e+06	1.34636e+06	425756	126.737	2.64327e+06	1.25432e+06	396651	47.4533	2.4882	1.3151	0.0991497	Up
A0A5C2GVB3		IG c1431_light_IGKV3-20_IGKJ4 (Fragment)		1.11683e+06	362597	1.21183e+06	2629924	689450	655716	1.04574e+06	993851	954268	1.37699e+06	103994	3304.4	105357	474721	646448	250.019	975515	478339	532687	728421	0.00539369	404904	336733	106484	83.1637	1.10372e+06	612390	193655	55.4842	2.72588	1.44672	0.0534485	Up
A0A5C2GVE0		IG c1461_light_IGKV3-20_IGKJ5 (Fragment)		316783	99201.3	376689	220596	257638	381232	47139.6	145965	132548	301451	250.019	250.019	250.019	250.019	250.019	250.019	250.019	250.019	180584	288901	0.00176552	47148.4	102114	32291.2	216.579	227924	117823	37258.8	51.6938	4.83418	2.27327	0.027899	Up
A0A5C2GVL8		IG c1541_light_IGKV1-12_IGKJ1 (Fragment)		8339.69	20073.6	118308	251163	37934.7	78554.3	125966	186457	73807.7	104891	250.019	250.019	250.019	250.019	83433.8	250.019	250.019	250.019	18934.3	7420.59	0.00232019	11153.9	26100.5	8253.7	234.004	100549	75382.8	23838.1	74.9709	9.01474	3.17229	0.0326131	Up
A0A5C2GVM3		IG c846_light_IGKV3-20_IGKJ4 (Fragment)		3.14745e+06	1.48377e+06	2.04178e+06	1605671	1.97423e+06	1.31214e+06	1.46905e+06	1.35702e+06	1937839	1.69565e+06	1.57346e+06	499810	794689	810442	1.35916e+06	1.00647e+06	1.57601e+06	1.0908e+06	877353	2208966	0.0156108	1.17972e+06	503307	159160	42.6634	1.80246e+06	539112	170482	29.9098	1.52788	0.611529	0.104433	Up
A0A5C2GVU1		IG c1453_light_IGKV3-11_IGKJ5 (Fragment)		4326662	2.50732e+06	5614984	2489801	1.52651e+06	3.31673e+06	2.43124e+06	2724773	2084758	2.19525e+06	478132	2246119	250.019	250.019	250.019	1.12533e+06	250.019	142717	2.44478e+06	3.41039e+06	0.00259319	984846	1.26793e+06	400955	128.744	2.9218e+06	1.21088e+06	382914	41.4429	2.96676	1.56889	0.0345278	Up
A0A5C2GVW9		IG c992_light_IGKV3-20_IGKJ4 (Fragment)		317359	96995.3	403842	301186	127672	81050.7	382867	253794	431766	564501	250.019	20279.8	250.019	250.019	250.019	250.019	21882.8	250.019	250.019	353079	0.000541794	39699.1	110451	34927.7	278.22	296103	158502	50122.7	53.5293	7.45869	2.89892	0.0146669	Up
A0A5C2GVX4		IG c1735_light_IGKV3-20_IGKJ2 (Fragment)		2795295	558085	1.00814e+06	494421	754831	250.019	1.19106e+06	1.44495e+06	1.29617e+06	749948	2.76118e+06	3.23797e+06	1.6763e+06	2.53983e+06	3.47227e+06	2.27742e+06	2.67179e+06	70550.4	1.33898e+06	719490	0.0232741	2.07658e+06	1.10276e+06	348725	53.1049	1.02931e+06	753494	238276	73.2035	0.495678	-1.01252	0.125043	Down
A0A5C2GW00		IG c1033_light_IGKV4-1_IGKJ2 (Fragment)		191288	93052.6	250.019	138939	250.019	502215	190063	384604	331965	250.019	21327.2	250.019	4354.68	38222.5	62915.3	47640.7	18003.4	118238	250.019	250.019	0.0149578	31145.2	37663.9	11910.4	120.93	183288	174825	55284.7	95.3831	5.88493	2.55703	0.102773	Up
A0A5C2GWH0		IG c907_heavy_IGHV3-9_IGHD6-19_IGHJ4 (Fragment)		91153.8	18644.2	65534.1	71608.3	106111	250.019	15598.4	25834.1	59748.6	38892.8	250.019	567318	422434	553315	110811	52241.3	250.019	250.019	334678	84226.9	0.041867	212577	233018	73686.9	109.616	49337.5	34944.4	11050.4	70.8273	0.232092	-2.10723	0.172867	Down
A0A5C2GWH7		IG c10_light_IGKV4-1_IGKJ3 (Fragment)		1.66192e+06	121207	774835	1207510	994369	197096	882979	494329	1.45515e+06	761540	594288	170489	729580	504659	40303.7	75186.5	271408	241042	877661	939815	0.0446787	444443	331075	104695	74.4921	855094	502473	158896	58.7623	1.92397	0.944084	0.178964	Up
A0A5C2GWK5		IG c1607_light_IGKV1-9_IGKJ3 (Fragment)		25260.5	48725.6	53916.3	30791.5	70943.2	31071.5	45602.4	25482.6	40195.6	48245.6	24280.1	20691.3	13250.8	36560	250.019	250.019	20777.6	35873.5	35421.4	10367.3	0.00240137	19772.2	13749.2	4347.88	69.5381	42023.5	14446.4	4568.34	34.3769	2.12538	1.08772	0.0328874	Up
A0A5C2GWL8		IG c1333_light_IGKV4-1_IGKJ1 (Fragment)		39467.7	25559.6	250.019	250.019	1806.32	250.019	605.631	39370.9	250.019	250.019	126529	154485	160604	190885	196919	69911.3	380592	339711	29350.8	163962	0.000108356	181295	108059	34171.3	59.604	10806	16987.9	5372.05	157.208	0.0596047	-4.06843	0.00673584	Down
A0A5C2GWP7		IG c1363_light_IGKV2-30_IGKJ1 (Fragment)		169259	142800	304872	83866.8	68321.4	25050.4	88109.2	73964	79453.2	57966	8800.14	58065.4	250.019	3606.18	250.019	250.019	250.019	80319.9	213393	250.019	0.0421141	36543.5	68391	21627.1	187.15	109366	80009.4	25301.2	73.1573	2.99277	1.58148	0.172867	Up
A0A5C2GWU4		IG c1292_light_IGKV1-12_IGKJ3 (Fragment)		233854	874309	287883	1.02408e+06	1.45574e+06	291850	919936	2.07113e+06	1.61081e+06	1.45964e+06	32666.9	7367.65	40139.7	42532.8	34313.3	20828.3	14235.8	169941	380378	39781.2	0.000187892	78218.6	115626	36564.2	147.824	1.02292e+06	628266	198675	61.4187	13.0777	3.70904	0.00883958	Up
A0A5C2GX24		IG c230_light_IGKV1-9_IGKJ3 (Fragment)		1.32668e+06	1.44351e+06	1.67651e+06	2.57782e+06	2806100	1.2212e+06	1.32533e+06	1.33905e+06	934167	1423025	1.05742e+06	360165	163992	189407	928017	9667.87	125150	69947	1.64104e+06	2.07154e+06	0.00545401	661635	730234	230920	110.368	1.60734e+06	603417	190817	37.5413	2.42935	1.28057	0.0534485	Up
A0A5C2GX83		IG c1039_light_IGKV4-1_IGKJ2 (Fragment)		89166.4	153771	278549	15577	92390	15489.6	266396	391790	250.019	137059	300613	442656	471095	200662	940184	160179	801499	1.35152e+06	135523	250.019	0.0283298	480418	426546	134886	88.7864	144044	130796	41361.5	90.8033	0.29983	-1.73778	0.13833	Down
A0A5C2GXB0		IG c1593_light_IGKV4-1_IGKJ2 (Fragment)		203929	10619.6	108851	52190.5	94950.5	18183.2	14852.4	49625.8	73006.2	24845.7	224978	83523.3	119394	330990	67716.7	111888	259126	276063	60481.5	47614	0.0245347	158177	104129	32928.6	65.8307	65105.4	59499.7	18815.5	91.3897	0.411597	-1.28069	0.127368	Down
A0A5C2GXT4		IG c520_light_IGKV3-11_IGKJ1 (Fragment)		1.38087e+06	2.78028e+06	1.2909e+06	3129608	2.42773e+06	1.07714e+06	2485341	2.70141e+06	1.44231e+06	1.71857e+06	713880	931969	3.43996e+06	1.38036e+06	494841	261358	343821	539353	1.62297e+06	664348	0.0166289	1.03929e+06	949469	300249	91.3578	2.04342e+06	738206	233441	36.1261	1.96617	0.975391	0.108261	Up
A0A5C2GY15		IG c1507_heavy_IGHV3-30_IGHD5-24_IGHJ2 (Fragment)		250.019	12704.3	250.019	818669	250.019	250.019	250.019	250.019	278394	250.019	1.8246e+06	4394759	4296858	4.79409e+06	250.019	6.43059e+06	533674	250.019	250.019	1.21951e+06	0.0090074	2.34948e+06	2.404e+06	760213	102.321	111152	263383	83289.1	236.958	0.047309	-4.40174	0.0753061	Down
A0A5C2GYD2		IG c648_light_IGKV1-9_IGKJ4 (Fragment)		2.58142e+06	1.84057e+06	1.44422e+06	1.75438e+06	1397330	713167	1142765	715709	1.39187e+06	1.21997e+06	580418	59345.3	250.019	19411.9	192719	328209	327115	250.019	1.45235e+06	1176499	0.000518352	413657	513702	162447	124.185	1.42014e+06	552970	174864	38.9377	3.43314	1.77953	0.0143168	Up
A0A5C2GYH7		IG c698_light_IGKV1-5_IGKJ1 (Fragment)		7.41201e+06	3.26448e+06	4219506	9646619	6.22321e+06	3.72708e+06	10818209	5894850	10723428	12130541	136113	2.18141e+06	3.17464e+06	1629751	1.51824e+06	6.27824e+06	634668	531910	4.14668e+06	6116064	0.00122443	2.63477e+06	2.23854e+06	707888	84.9614	7.40599e+06	3.2406e+06	1.02477e+06	43.7564	2.81087	1.49102	0.0218724	Up
A0A5C2GYU5		IG c818_light_IGKV1-5_IGKJ3 (Fragment)		250.019	249861	3.09538e+06	3992570	3.75567e+06	4.17674e+06	6290848	3793068	3.98212e+06	4.52241e+06	13823.5	720712	697072	535605	250.019	68678.4	250.019	250.019	4.86914e+06	3083856	0.00782951	998964	1.65115e+06	522138	165.286	3.38589e+06	1.90798e+06	603357	56.351	3.3894	1.76103	0.0678243	Up
A0A5C2GZS4		IG c1188_light_IGKV3-20_IGKJ2 (Fragment)		739165	1.45194e+06	31317.1	614999	1.61933e+06	648839	256687	1.39201e+06	1.03694e+06	1.7991e+06	31064	768944	119017	25935.7	43803.6	113857	13054.1	188996	490370	260670	0.00165056	205571	245779	77722.2	119.559	959032	595825	188416	62.1277	4.66521	2.22194	0.0265771	Up
A0A5C2GZX4		IG c276_light_IGKV3-15_IGKJ1 (Fragment)		1.80566e+06	1.64906e+06	1366581	1.29296e+06	2.30802e+06	1.03417e+06	1.87238e+06	1236501	2.61046e+06	1.57993e+06	126791	15909.3	16687.5	35145	1.06492e+06	185775	449048	172325	1561858	1.96512e+06	0.000721607	559358	714145	225832	127.672	1.67557e+06	492787	155833	29.4101	2.99553	1.58281	0.016471	Up
A0A5C2H0E8		IG c1550_light_IGKV3-15_IGKJ1 (Fragment)		1.41298e+06	1.31828e+06	1.55564e+06	1.32342e+06	1.87867e+06	1.63044e+06	1701345	1.27514e+06	998675	1.86856e+06	1.02965e+06	771322	1.2838e+06	932891	305221	466100	737161	892332	1.16798e+06	773249	7.53033e-05	835970	297627	94118	35.6026	1.49631e+06	281545	89032.3	18.8159	1.78991	0.83989	0.00528225	Up
A0A5C2H0K9		IG c466_light_IGKV3-20_IGKJ1 (Fragment)		250.019	15672.8	255614	385326	180547	359212	179309	152977	166493	177028	118738	21970.7	59171.4	27498	290581	71939.1	78448.4	64860.6	89517.1	29201.8	0.0416452	85192.6	78245	24743.3	91.8449	187243	124590	39398.8	66.5393	2.19788	1.13611	0.172581	Up
A0A5C2H0U4		IG c1690_light_IGKV3-20_IGKJ2 (Fragment)		250.019	196337	59357.9	250.019	413217	856745	95586.3	250.019	789345	138986	250.019	250.019	250.019	250.019	250.019	250.019	250.019	250.019	250.019	102459	0.0290909	10470.9	32321.3	10220.9	308.677	255032	324540	102629	127.254	24.3563	4.60622	0.140378	Up
A0A5C2H0U9		IG c556_light_IGKV2-24_IGKJ2 (Fragment)		20832.4	55506.9	65760.5	250.019	7380.03	11869.2	21713.7	1863.28	43540.5	14535.5	398386	32438.8	124365	120338	98063.8	168594	104323	132098	11793.4	250.019	0.0179595	119065	112773	35662	94.7156	24325.2	22851.5	7226.27	93.9416	0.204302	-2.29123	0.111558	Down
A0A5C2H1G0		IG c736_light_IGKV3-20_IGKJ1 (Fragment)		921536	569315	250.019	391601	842281	215989	306947	1.17311e+06	308240	96916.9	1.19916e+06	1.47255e+06	1.91413e+06	1.33729e+06	1.29388e+06	1.05762e+06	1.28548e+06	655702	616325	63781.7	0.00830853	1.08959e+06	521273	164841	47.8412	482618	384186	121490	79.6044	0.442935	-1.17483	0.070906	Down
A0A5C2H1S8		IG c886_light_IGLV3-25_IGLJ3 (Fragment)		930680	918442	862780	881204	1.03857e+06	606749	198510	1083908	299796	1.04348e+06	250.019	250.019	250.019	250.019	250.019	250.019	250.019	250.019	1.00765e+06	250.019	0.000129263	100990	318569	100740	315.445	786412	313747	99215.6	39.896	7.787	2.96107	0.0072894	Up
A0A5C2H214		IG c986_light_IGLV1-40_IGLJ2 (Fragment)		618475	250.019	250.019	250.019	327770	250.019	237254	135947	250.019	975440	250.019	250.019	250.019	250.019	250.019	250.019	250.019	250.019	250.019	250.019	0.0421001	250.019	0	0	0	229614	331491	104827	144.369	918.383	9.84295	0.172867	Up
A0A5C2H271		IG c1046_light_IGKV1-5_IGKJ3 (Fragment)		250.019	86595.3	359847	180017	250.019	250.019	90461.8	265677	142433	212587	17371.8	1396.71	250.019	51953.3	19024.2	93333.6	8853.48	250.019	250.019	250.019	0.0100948	19293.3	30609.1	9679.45	158.651	133837	122257	38660.9	91.3475	6.93695	2.7943	0.0817823	Up
A0A5C2H3I6		IG c1576_light_IGLV3-21_IGLJ2 (Fragment)		250.019	41956.6	2020.63	47577.2	34783.2	47958.6	20138	47595.8	38405.3	48595.7	250.019	250.019	250.019	250.019	250.019	250.019	250.019	1726.86	52815.3	33951.6	0.0106462	9024.39	18652.3	5898.39	206.688	32928.1	18864.4	5965.45	57.2897	3.64879	1.86742	0.0843436	Up
A0A7S5BY47		IGH c312_heavy_IGHV1-2_IGHD2-21_IGHJ4 (Fragment)		250.019	250.019	250.019	250.019	250.019	250.019	250.019	250.019	250.019	250.019	99791.3	318644	301714	250.019	41423	250.019	137031	55450.6	250.019	250.019	0.0242079	95505.5	122420	38712.5	128.181	250.019	0	0	0	0.00261785	-8.5774	0.1268	Down
A0A7S5BYC4		IGH c462_heavy_IGHV3-33_IGHD6-13_IGHJ1 (Fragment)		1.94711e+06	1.11203e+06	1.66808e+06	1.40798e+06	584907	766883	650580	971099	1.20338e+06	975279	360146	752111	861179	1.13027e+06	415741	722660	78707	601192	459900	279869	0.00394933	566178	309388	97837.1	54.645	1.12873e+06	440729	139371	39.0463	1.9936	0.995378	0.0435183	Up
A0A7S5BYK1		IGH c893_heavy_IGHV3-20_IGHD3-22_IGHJ4 (Fragment)		8044.75	97462.7	823090	266933	101389	1.55385e+06	250.019	250.019	250.019	21867.9	1.07935e+06	1.74145e+06	1997667	2.46606e+06	954368	2.05882e+06	1.68476e+06	1.72418e+06	444599	284296	0.000618488	1.44356e+06	720379	227804	49.9031	287338	511844	161859	178.133	0.199049	-2.3288	0.0153342	Down
A0A7S5BYK2		IGH c642_heavy_IGHV3-48_IGHD3-10_IGHJ6 (Fragment)		9248343	6802485	2.93485e+06	2.14796e+06	3.06738e+06	2.48968e+06	3.50601e+06	3.61532e+06	15931332	704922	242191	501698	2.02543e+06	437611	187189	561480	224447	1.18053e+06	499485	78511.8	0.00656906	593857	589495	186415	99.2654	5.04483e+06	4.54367e+06	1.43683e+06	90.0658	8.49501	3.08662	0.0601676	Up
A0A7S5BYT7		IGH c170_heavy_IGHV4-59B_IGHD3-10_IGHJ6 (Fragment)		46375.2	47472.4	250.019	250.019	250.019	250.019	250.019	250.019	250.019	250.019	142678	250.019	56028.3	127977	179590	236254	214727	650965	48887.8	250.019	0.0187413	165761	190155	60132.3	114.716	9584.77	19681.1	6223.71	205.337	0.0578229	-4.11221	0.113473	Down
A0A7S5BYT8		IGH c973_heavy_IGHV3-23_IGHD6-19_IGHJ3 (Fragment)		250.019	5281945	29685.9	4507978	807436	1.89203e+06	220943	2.71542e+06	198847	2.41139e+06	16396.2	99019.1	12127.7	32222.5	550001	7289.27	166173	8248.62	225104	1.43177e+06	0.022661	254835	446307	141135	175.136	1.80659e+06	1.91753e+06	606376	106.141	7.08927	2.82564	0.123695	Up
A0A7S5BYW6		IGH c444_heavy_IGHV3-33_IGHD5-24_IGHJ6 (Fragment)		331402	9188916	226281	30632570	30945718	23976656	478749	15476997	26727128	20252338	31825.9	37485.4	15798	11768.5	42014.2	7809.63	35853.4	19647.8	6.61045e+06	15873556	0.00546379	2.26862e+06	5.20905e+06	1.64725e+06	229.613	1.58237e+07	1.25426e+07	3.96631e+06	79.2646	6.97502	2.8022	0.0534485	Up
A0A7S5BZA1		IGH c1041_heavy_IGHV3-48_IGHD3-22_IGHJ4 (Fragment)		250.019	250.019	92542.3	250.019	250.019	250.019	250.019	117030	250.019	250.019	267030	250.019	10970	104488	519083	441175	724028	1.39355e+06	250.019	250.019	0.0352083	346108	449039	141999	129.74	21157.2	44452.5	14057.1	210.106	0.061129	-4.032	0.156505	Down
A0A7S5BZA6		IGH c1047_heavy_IGHV3-23_IGHD6-19_IGHJ4 (Fragment)		1.12508e+06	512778	815704	502413	1.17127e+06	779523	918202	517808	1.02434e+06	958058	441647	155163	352366	226294	347197	153257	566675	909057	316663	467024	0.00066503	393534	225026	71159.5	57.1808	832518	252451	79832	30.3238	2.11549	1.08099	0.0158068	Up
A0A7S5BZB2		IGH c1243_heavy_IGHV3-48_IGHD1-26_IGHJ4 (Fragment)		642861	650305	645710	680373	798996	473843	360926	363136	608007	502294	182636	314090	131072	103490	113416	304817	54214.5	57585.3	681703	534475	0.000830889	247750	213050	67372.3	85.994	572645	142914	45193.5	24.9569	2.31138	1.20876	0.0175661	Up
A0A7S5BZE9		IGH c1303_heavy_IGHV3-33_IGHD5-18_IGHJ6 (Fragment)		128969	269478	44381.4	250.019	3.56846e+06	511883	1.99314e+06	1378337	978591	415919	42655256	28935722	18827350	31261124	615348	47793608	31075472	1.02414e+06	1.51701e+06	140354	0.0038438	2.03845e+07	1.85198e+07	5.85647e+06	90.8521	928941	1.12846e+06	356852	121.479	0.0455709	-4.45574	0.0431343	Down
A0A7S5BZH2		IGH c1161_heavy_IGHV3-15_IGHD3-16_IGHJ5 (Fragment)		1.30642e+06	2.01862e+06	689080	2.34369e+06	1.71077e+06	2535866	656187	1.72554e+06	2350839	2.11588e+06	1.42751e+06	905859	402985	485928	1.04534e+06	256212	1.06333e+06	1.28284e+06	1.33834e+06	864298	0.00338976	907264	408045	129035	44.9753	1.74529e+06	671462	212335	38.4728	1.92368	0.943872	0.040285	Up
A0A7S5BZR4		IGH c894_heavy_IGHV4-39_IGHD5-12_IGHJ5 (Fragment)		46232.3	47472.3	250.019	250.019	250.019	250.019	250.019	250.019	250.019	250.019	142678	250.019	56028.3	127977	179590	236254	214727	650965	48887.8	250.019	0.0187303	165761	190155	60132.3	114.716	9570.48	19651.4	6214.33	205.334	0.0577367	-4.11437	0.113473	Down
A0A7S5BZV5		IGH c1347_heavy_IGHV3-30_IGHD6-19_IGHJ2 (Fragment)		1.56317e+06	259047	1.0028e+06	1.00417e+06	939148	481907	236806	62421.5	1.28009e+06	748923	69481.6	241970	245831	287823	14468.8	513442	7802.59	306754	1.00338e+06	134319	0.0170954	282527	296506	93763.4	104.948	757848	489325	154738	64.5677	2.68239	1.42352	0.108535	Up
A0A7S5C006		IGH c1_heavy_IGHV3-9_IGHD6-13_IGHJ4 (Fragment)		83465.9	85321.7	9140.88	36648.2	164399	72944.3	37753.9	166707	87635.3	195140	183913	174738	241618	342212	836346	412784	423920	161650	78673.2	168431	0.00986899	302429	219969	69560.4	72.7343	93915.6	62178.5	19662.6	66.2068	0.310538	-1.68716	0.0804057	Down
A0A7S5C021		IGH c1571_heavy_IGHV3-48_IGHD4-23_IGHJ4 (Fragment)		13709601	4276643	12100315	10199389	16593880	8.20882e+06	6.67221e+06	8215386	6.71262e+06	8.17926e+06	11345535	4910608	1.16271e+06	2483676	7200586	5.42992e+06	4.0342e+06	4477597	9085202	9288270	0.0348688	5.94183e+06	3.22785e+06	1.02074e+06	54.3242	9.48681e+06	3.70291e+06	1.17096e+06	39.0322	1.59661	0.675016	0.155268	Up
A0A7S5C040		IGH c905_heavy_IGHV1-18_IGHD3-22_IGHJ3 (Fragment)		806702	370910	361449	523438	567700	283407	454118	365565	187010	353958	534978	250.019	250.019	2119.92	12061	250.019	250.019	619968	41123.5	76514.1	0.00490226	128776	238613	75455.9	185.292	427426	172810	54647.4	40.4305	3.31913	1.7308	0.0503532	Up
A0A7S5C084		IGH c1596_heavy_IGHV5-51_IGHD6-13_IGHJ4 (Fragment)		250.019	250.019	250.019	250.019	250.019	250.019	250.019	250.019	250.019	250.019	18505.1	250.019	39060.8	28190.4	250.019	18972.4	34630.8	46807.1	250.019	250.019	0.00446976	18716.7	17981.9	5686.38	96.0744	250.019	0	0	0	0.0133581	-6.22614	0.0474355	Down
A0A7S5C092		IGH c1611_heavy_IGHV4-59B_IGHD3-9_IGHJ6 (Fragment)		250.019	250.019	250.019	250.019	250.019	250.019	250.019	250.019	250.019	250.019	68676.5	250.019	67225.9	75057.5	20305.4	50234.5	250.019	250.019	250.019	250.019	0.0151513	28275	33016.5	10440.7	116.769	250.019	0	0	0	0.00884242	-6.82134	0.103259	Down
A0A7S5C094		IGH c754_heavy_IGHV3-48_IGHD3-10_IGHJ4 (Fragment)		31052086	42336024	99158.6	40472420	27899806	14742073	24143054	21153494	24196234	19972574	7765.19	32450.5	299612	85354.9	7428.96	30888.5	7051.56	9411.01	4.21674e+06	11185053	2.09683e-05	1.58818e+06	3.61728e+06	1.14389e+06	227.763	2.46067e+07	1.22481e+07	3.8732e+06	49.7756	15.4937	3.95361	0.00232698	Up
A0A7S5C0E2		IGH c1010_heavy_IGHV1-69_IGHD4-17_IGHJ6 (Fragment)		1.41098e+06	1553350	502651	2.05646e+06	502691	1.44551e+06	918525	1.69112e+06	715796	1.54024e+06	564023	315351	195093	285086	245809	328775	582353	368651	1114919	1.1123e+06	0.00208596	511236	341091	107862	66.7189	1.23373e+06	536965	169803	43.5236	2.41324	1.27097	0.0313768	Up
A0A7S5C0F4		IGH c844_heavy_IGHV5-51_IGHD3-22_IGHJ4 (Fragment)		9926361	8.35566e+06	7.39133e+06	15645649	10722890	9666679	9178897	5.05684e+06	9861527	6805554	11828389	2.14149e+06	3.05856e+06	1012.2	2.57263e+06	3807780	3.57595e+06	9102849	3.72e+06	4.66535e+06	0.00318607	4.4474e+06	3.47097e+06	1.09762e+06	78.0448	9.26114e+06	2.82636e+06	893775	30.5185	2.08237	1.05823	0.038663	Up
A0A7S5C0G2		IGH c1040_heavy_IGHV3-11_IGHD6-13_IGHJ5 (Fragment)		95560	111586	8716.95	32356.2	98358.7	108423	53769.2	39910.9	96247	91219.1	8606.69	77790	31871.9	107494	250.019	5370.71	10993.6	3638.75	1908.58	2883.44	0.00883081	25080.8	37387.8	11823.1	149.07	73614.6	36534.9	11553.3	49.6299	2.9351	1.55341	0.0742614	Up
A0A7S5C0G7		IGH c1269_heavy_IGHV3-48_IGHD3-9_IGHJ2 (Fragment)		825159	398561	5.40607e+06	3362134	2.23821e+06	2.29253e+06	2984394	1522817	744510	301384	106360	110944	135152	133750	152932	154371	113438	149799	563400	618707	0.00262882	223885	194729	61578.7	86.9771	2.00758e+06	1.6056e+06	507736	79.9771	8.96699	3.16462	0.0346811	Up
A0A7S5C0H2		IGH c1943_heavy_IGHV3-74_IGHD3-22_IGHJ4 (Fragment)		640305	490200	580168	486502	654456	406457	279004	336928	487658	353386	143814	71309.2	91724.4	128456	105617	119076	49981.2	233504	336254	372846	2.10367e-05	165258	111563	35279.2	67.5082	471506	128218	40546.1	27.1933	2.85315	1.51256	0.00232698	Up
A0A7S5C0I5		IGH c1948_heavy_IGHV1-18_IGHD2-8_IGHJ4 (Fragment)		927414	34270	383620	562754	724433	616650	183037	277430	401520	250.019	250.019	250.019	250.019	250.019	250.019	250.019	250.019	250.019	679278	128811	0.0110768	81008.9	214058	67691	264.24	411138	300284	94958.1	73.0373	5.07522	2.34347	0.0856466	Up
A0A7S5C137		IGH c1644_heavy_IGHV3-33_IGHD1-26_IGHJ3 (Fragment)		289194	235947	251289	135663	173349	86316.9	185603	132860	210307	326214	665585	1.97147e+06	4.44999e+06	1.26745e+06	279639	1.26039e+06	264008	1.33213e+06	91100.3	146048	0.031517	1.17278e+06	1.3134e+06	415332	111.99	202674	74782.3	23648.2	36.8977	0.172815	-2.5327	0.146198	Down
A0A7S5C172		IGH c1219_heavy_IGHV3-48_IGHD4-17_IGHJ3 (Fragment)		370139	412694	466484	400113	286659	240693	183980	198487	151930	236065	1.14956e+06	752091	941747	967077	423634	222017	1188422	951693	168192	262969	0.00571261	702740	396524	125392	56.4254	294724	109825	34729.7	37.2636	0.419393	-1.25363	0.0549735	Down
A0A7S5C199		IGH c1249_heavy_IGHV3-48_IGHD4-17_IGHJ3 (Fragment)		276559	199768	179618	6703815	4251966	7793781	126827	3.35041e+06	197123	7.98339e+06	250.019	320386	289562	74453.4	90242.2	109016	250.019	787409	320431	800275	0.016646	279228	297305	94016.2	106.474	3.10633e+06	3.37366e+06	1.06684e+06	108.606	11.1247	3.4757	0.108261	Up
A0A7S5C1G9		IGH c1854_heavy_IGHV4-39_IGHD7-27_IGHJ4 (Fragment)		250.019	577775	87716.7	511655	1.77551e+06	105369	1.33204e+06	732426	1.57384e+06	151924	250.019	250.019	250.019	250.019	250.019	250.019	250.019	106750	194966	491602	0.0110781	79506.9	159118	50317.6	200.131	684851	657223	207832	95.9659	8.61373	3.10664	0.0856466	Up
A0A7S5C1H6		IGH c1869_heavy_IGHV5-51_IGHD6-25_IGHJ6 (Fragment)		818054	839807	451693	284818	507612	342922	536787	387595	971013	517342	310713	39825.4	68196.8	78666.7	104866	135667	152780	445259	698562	293793	0.00336232	232833	208742	66010	89.6532	565764	231634	73249.1	40.9418	2.42992	1.28091	0.0401246	Up
A0A7S5C1I6		IGH c2503_heavy_IGHV3-23_IGHD5-18_IGHJ4 (Fragment)		265190	144922	60536.6	69771.4	198048	346980	227388	191296	125185	335530	140891	98746.9	111631	109724	139113	115596	118809	117621	106978	94196.6	0.0206226	115331	15176.4	4799.18	13.159	196485	99982	31617.1	50.8854	1.70366	0.768641	0.118983	Up
A0A7S5C1S9		IGH c145_heavy_IGHV3-48_IGHD2-2_IGHJ4 (Fragment)		665493	915794	475066	250.019	329715	335128	531071	135326	240118	213852	255935	1.73219e+06	2.29124e+06	2.73189e+06	449850	2.70051e+06	534404	303628	509430	243206	0.034876	1.17523e+06	1.06244e+06	335972	90.4025	384181	269991	85378.7	70.277	0.326899	-1.61308	0.155268	Down
A0A7S5C1V2		IGH c1549_heavy_IGHV4-34_IGHD3-10_IGHJ4 (Fragment)		80685.1	9347.67	85820.4	250.019	54034.2	19595.6	141779	250.019	26110.5	250.019	412554	202461	244282	406084	244386	347243	227297	313481	4028.16	4537.54	0.000614727	240636	144141	45581.3	59.9	41812.3	47803.9	15116.9	114.33	0.173758	-2.52485	0.0153342	Down
A0A7S5C1V6		IGH c2337_heavy_IGHV3-7_IGHD3-9_IGHJ6 (Fragment)		392005	733318	412868	486873	254958	210528	414087	275175	264590	198168	75933.9	106974	60631.8	58798.6	263585	28462.9	87996.1	98416.1	144284	100080	0.000167415	102516	64805.1	20493.2	63.2144	364257	162580	51412.4	44.6334	3.55316	1.8291	0.00859793	Up
A0A7S5C230		IGH c2631_heavy_IGHV3-49_IGHD3-22_IGHJ3 (Fragment)		26351.5	250.019	1420492	250.019	944287	1.03882e+06	1.58307e+06	799100	1.93921e+06	1.41688e+06	250.019	128420	250.019	23153.3	250.019	250.019	106606	119046	75634.3	250.019	0.0010796	45411	55441.5	17532.2	122.088	916871	706757	223496	77.0836	20.1905	4.33561	0.0202792	Up
A0A7S5C231		IGH c2783_heavy_IGHV4-34_IGHD3-22_IGHJ3 (Fragment)		1.40327e+06	1.3354e+06	1148441	1.50486e+06	1.90685e+06	1.40448e+06	1185217	1.05422e+06	1.29407e+06	1.41597e+06	2.42888e+06	4.19373e+06	3.37897e+06	3.60053e+06	2.34349e+06	4.87568e+06	2.74e+06	4339854	1.3438e+06	1.76894e+06	0.000213931	3.10139e+06	1.16539e+06	368527	37.5763	1365279	235820	74572.7	17.2726	0.440215	-1.18372	0.00907767	Down
A0A7S5C284		IGH c2542_heavy_IGHV3-33_IGHD3-10_IGHJ4 (Fragment)		340693	250.019	665173	250.019	886747	494060	522220	377508	250.019	250.019	567829	754304	1.08425e+06	1.00402e+06	1.0657e+06	1.06308e+06	1.04797e+06	1.34194e+06	250.019	250.019	0.0182117	792960	465727	147276	58.7328	328740	320324	101295	97.44	0.414574	-1.2703	0.112156	Down
A0A7S5C286		IGH c385_heavy_IGHV3-23_IGHD3-22_IGHJ4 (Fragment)		7.45246e+06	10691361	16426340	11677148	20957106	5.41356e+06	18685640	3.63125e+06	8770348	6175100	5408315	12917108	4.73061e+06	3737152	396310	7360300	12871365	4454284	2.96932e+06	2.20015e+06	0.0336531	5.70449e+06	4.22342e+06	1.33556e+06	74.0368	1.0988e+07	5.91188e+06	1.8695e+06	53.803	1.92621	0.945763	0.15218	Up
A0A7S5C2B7		IGH c2766_heavy_IGHV5-51_IGHD3-10_IGHJ4 (Fragment)		19737.2	33490.7	199518	263667	138243	203418	178879	150896	357421	172884	250.019	30032.6	13184.2	250.019	5471.66	6299.55	250.019	69221.7	57024.4	105494	0.000451082	28747.8	36596.3	11572.8	127.301	171815	99179.8	31363.4	57.7246	5.97665	2.57934	0.0136559	Up
A0A7S5C2G0		IGH c1849_heavy_IGHV3-7_IGHD2-8_IGHJ3 (Fragment)		137162	499545	73721.8	235687	13891.2	108868	83133.1	241497	92261	486967	1.27726e+06	993661	1159012	2411540	989009	599275	988592	547645	110158	695567	0.00105376	977172	609133	192625	62.3363	197273	170978	54067.9	86.6705	0.201882	-2.30842	0.0200703	Down
A0A7S5C2N0		IGH c3088_heavy_IGHV3-33_IGHD3-3_IGHJ4 (Fragment)		2.28981e+06	3.41882e+06	250.019	1.32349e+06	5.28159e+06	2859399	1.84889e+06	2.68714e+06	2454238	2571834	1.90104e+06	571340	897405	1.10371e+06	885826	1.8409e+06	974131	1200617	50280.9	2222955	0.0138773	1.16482e+06	658609	208270	56.5417	2.47355e+06	1.36817e+06	432653	55.312	2.12354	1.08647	0.0983033	Up
A0A7S5C2X3		IGH c745_heavy_IGHV3-15_IGHD3-9_IGHJ6 (Fragment)		87436848	250.019	31382112	50999012	54470160	44090960	38050572	31920066	11313594	8402927	112567	390846	2.62498e+06	1.96483e+06	3.44197e+06	3.58206e+06	353431	2.27034e+06	9147049	10410982	0.000976691	3.42991e+06	3.57909e+06	1.13181e+06	104.349	3.58067e+07	2.579e+07	8.15552e+06	72.0258	10.4395	3.38399	0.0191298	Up
A0A7S5C318		IGH c805_heavy_IGHV3-48_IGHD4-17_IGHJ3 (Fragment)		2.43434e+06	1.42338e+06	2.91306e+06	1.71314e+06	4563807	1.21404e+06	1061839	716821	2.77067e+06	1.29685e+06	1.01512e+06	975067	871034	929870	1.57169e+06	1.63704e+06	1.78017e+06	1.3854e+06	373160	579250	0.0362082	1.11178e+06	466342	147470	41.9455	2.01079e+06	1.16628e+06	368810	58.0009	1.80862	0.854893	0.159037	Up
A0A7S5C334		IGH c2679_heavy_IGHV3-48_IGHD3-16_IGHJ4 (Fragment)		250.019	51485.8	112718	250.019	250.019	250.019	232548	250.019	125307	279046	481780	250.019	250.019	250.019	1.50045e+06	250.019	898026	1.24467e+06	603487	445388	0.0237868	517480	550134	173968	106.31	80235.6	104683	33103.6	130.469	0.155051	-2.68919	0.125755	Down
A0A7S5C362		IGH c3266_heavy_IGHV5-51_IGHD3-10_IGHJ3 (Fragment)		250.019	250.019	250.019	250.019	250.019	250.019	250.019	250.019	250.019	250.019	29921.8	122850	47734.8	28676.8	9558.07	13043.4	62016.8	15120	250.019	250.019	0.0127307	32942.2	37376.2	11819.4	113.46	250.019	0	0	0	0.00758964	-7.04175	0.0929274	Down
A0A7S5C3A0		IGH c2299_heavy_IGHV3-15_IGHD6-13_IGHJ4 (Fragment)		856312	1.87817e+06	1.18859e+06	737101	806113	1.56607e+06	1.83571e+06	1.38975e+06	1.67077e+06	1.80898e+06	675134	550556	592071	815760	1.15571e+06	1.06199e+06	778549	889105	363942	497233	0.00102847	738005	251273	79459.6	34.0476	1.37376e+06	448738	141904	32.6651	1.86145	0.896424	0.0197192	Up
A0A7S5C3B1		IGH c3428_heavy_IGHV3-48_IGHD6-13_IGHJ4 (Fragment)		250.019	29405862	140972384	144101456	15488.1	112980640	86476216	53751.9	86537.2	99863632	250.019	250.019	250.019	250.019	250.019	250.019	250.019	9976412	20377800	8070051	0.00872797	3.8426e+06	6.93023e+06	2.19153e+06	180.353	6.13956e+07	6.14857e+07	1.94435e+07	100.147	15.9776	3.99798	0.0736119	Up
A0A7S5C3K5		IGH c2934_heavy_IGHV4-34_IGHD3-10_IGHJ6 (Fragment)		250.019	140760	250.019	250.019	250.019	250.019	250.019	250.019	250.019	250.019	419599	1.25144e+06	250.019	579049	189862	886561	184252	812453	250.019	250.019	0.00759381	432397	437653	138398	101.216	14301.1	44433.3	14051	310.699	0.0330739	-4.91816	0.0667884	Down
A0A7S5C3L3		IGH c3583_heavy_IGHV1-18_IGHD3-10_IGHJ5 (Fragment)		607886	242317	557020	106071	250.019	555733	626244	506288	541873	703471	576339	1088819	1.19144e+06	1.27968e+06	930431	1535470	539269	250.019	808559	989914	0.0107941	894018	438434	138645	49.0409	444715	239883	75857.6	53.9408	0.497435	-1.00742	0.084588	Down
A0A7S5C3M4		IGH c3277_heavy_IGHV3-23_IGHD3-22_IGHJ4 (Fragment)		427106	431870	380700	1.12231e+06	662971	537081	404050	232754	539266	220033	39654.5	28189.2	13114.5	68920.5	5756.01	97004.7	43663.5	872.692	219507	120059	7.12388e-05	63674.1	67241.6	21263.7	105.603	495814	258148	81633.5	52.0655	7.78674	2.96102	0.00528225	Up
A0A7S5C3N5		IGH c2554_heavy_IGHV4-34_IGHD5-24_IGHJ2 (Fragment)		187755	250.019	184855	513159	250.019	238908	377909	263412	283373	250.019	250.019	250.019	250.019	250.019	250.019	250.019	250.019	250.019	265532	223531	0.023711	49106.4	103473	32721	210.712	205012	170631	53958.3	83.2297	4.17486	2.06173	0.125755	Up
A0A7S5C3P9		IGH c3307_heavy_IGHV3-74_IGHD3-9_IGHJ4 (Fragment)		1.45258e+06	1.57929e+06	1.07946e+06	1.80762e+06	1.17007e+06	1378234	1.90962e+06	2.20432e+06	1.65395e+06	1492795	837931	235390	369834	326574	1.19188e+06	208573	569758	839083	1.11033e+06	912627	1.753e-05	660198	365275	115510	55.3282	1.57279e+06	339659	107410	21.5959	2.38231	1.25236	0.00219201	Up
A0A7S5C431		IGH c3447_heavy_IGHV1-2_IGHD5-24_IGHJ5 (Fragment)		250.019	11589.4	250.019	3762.34	2449.62	250.019	4022.47	982.465	3749.3	3369.7	250.019	250.019	250.019	250.019	250.019	250.019	250.019	250.019	250.019	250.019	0.0169124	250.019	0	0	0	3067.54	3384.9	1070.4	110.346	12.2692	3.61697	0.108261	Up
A0A7S5C452		IGH c2749_heavy_IGHV3-21_IGHD6-19_IGHJ4 (Fragment)		218517	465640	26354.4	286499	168549	143369	239494	187398	275417	207412	250.019	250.019	250.019	250.019	250.019	250.019	250.019	250.019	73890.1	111582	4.39735e-05	18747.3	39994.8	12647.5	213.337	221865	113245	35811.1	51.0421	11.8345	3.56493	0.00361336	Up
A0A7S5C4B4		IGH c3958_heavy_IGHV4-34_IGHD6-13_IGHJ4 (Fragment)		150523	310414	1.0826e+06	654778	1.40879e+06	1.30353e+06	337600	452092	1.34271e+06	436546	1765430	2270477	2.04284e+06	1.57422e+06	1.19533e+06	2.34881e+06	2039716	4330233	162162	561228	0.0128395	1.82904e+06	1.13859e+06	360054	62.2506	747959	485460	153516	64.9046	0.408934	-1.29006	0.0933897	Down
A0A7S5C4F1		IGH c4018_heavy_IGHV3-21_IGHD3-22_IGHJ2 (Fragment)		98943.1	362780	133552	285373	120688	59493.9	80452.6	127836	282393	162539	320371	310208	613798	647688	661950	416651	528588	425069	125655	98599.6	0.00329515	414858	203148	64241	48.968	171405	102177	32311.1	59.6112	0.413166	-1.27521	0.0394868	Down
A0A7S5C4H7		IGH c3971_heavy_IGHV3-49_IGHD3-9_IGHJ6 (Fragment)		250.019	250.019	250.019	250.019	250.019	89548.7	250.019	250.019	250.019	250.019	250.019	59500.5	265193	230628	107189	390746	250.019	250.019	250.019	250.019	0.0490375	105451	141433	44725.2	134.123	9179.89	28238.7	8929.87	307.615	0.0870539	-3.52195	0.18951	Down
A0A7S5C4I9		IGH c3230_heavy_IGHV3-7_IGHD2-15_IGHJ4 (Fragment)		250.019	250.019	250.019	250.019	250.019	250.019	250.019	250.019	250.019	52471.1	1.23172e+06	617534	695983	1.11061e+06	7601.77	1.02858e+06	250.019	250.019	250.019	250.019	0.0119038	469303	524078	165728	111.671	5472.13	16513.8	5222.11	301.779	0.0116601	-6.42227	0.0889232	Down
A0A7S5C4T1		IGH c3877_heavy_IGHV4-34_IGHD5-12_IGHJ3 (Fragment)		250.019	223946	38541.9	250.019	250.019	53172.5	250.019	250.019	250.019	250.019	617686	966392	1.68181e+06	75581	230570	684290	728458	1.63339e+06	250.019	250.019	0.00518322	661868	622629	196893	94.0714	31741.1	70230	22208.7	221.259	0.0479568	-4.38212	0.0524892	Down
A0A7S5C559		IGH c4057_heavy_IGHV3-64_IGHD3-9_IGHJ6 (Fragment)		21641.5	17432.5	36103.2	38804.6	250.019	72378.9	39031.1	39008.8	30918.4	39712.2	5721.95	9086.23	8436.13	12829.3	1265.04	7770.06	5491.07	1982.93	12816.5	30837.4	0.00170525	9623.66	8407.53	2658.69	87.363	33528.1	18729.1	5922.67	55.861	3.48392	1.80071	0.0270956	Up
A0A7S5C5G4		IGH c3454_heavy_IGHV3-48_IGHD6-13_IGHJ4 (Fragment)		2.74971e+06	4.17575e+06	2.65199e+06	5.70198e+06	6.07853e+06	3238094	1.84526e+06	1.94331e+06	3.91216e+06	5853827	113284	362566	953370	10506.1	164566	1.87635e+06	530461	517166	2768710	1.92316e+06	0.000111918	922015	943583	298387	102.339	3.81506e+06	1.60499e+06	507543	42.0699	4.13774	2.04884	0.00673584	Up
A0A7S5C5S9		IGH c2455_heavy_IGHV1-46_IGHD3-22_IGHJ4 (Fragment)		266743	164826	16719.1	111597	156139	39270.5	165788	123867	143804	69698.8	432061	1577428	1.76674e+06	2.48713e+06	411979	1.27429e+06	1.29787e+06	1063915	43622.4	55175.3	0.00203376	1.04102e+06	799984	252977	76.8461	125845	72242.3	22845	57.4056	0.120886	-3.04828	0.0311122	Down
A0A7S5C5Y2		IGH c3679_heavy_IGHV3-33_IGHD6-19_IGHJ2 (Fragment)		490292	554543	492478	527499	139271	164620	414447	250.019	225737	65453.1	708348	771819	707026	1370757	713776	195056	2041394	1.26291e+06	117976	475140	0.0143169	836421	580208	183478	69.3679	307459	209997	66406.8	68.3007	0.367589	-1.44383	0.100183	Down
A0A7S5C661		IGH c3844_heavy_IGHV3-74_IGHD6-19_IGHJ4 (Fragment)		473626	304285	245408	431186	353646	271592	346545	307270	472062	501574	250.019	250.019	250.019	250.019	685845	250.019	250.019	250.019	346937	597764	0.036401	163230	275203	87027	168.599	370719	92185.8	29151.7	24.8667	2.27115	1.18342	0.159587	Up
A0A7S5C677		IGH c3874_heavy_IGHV1-46_IGHD1-26_IGHJ5 (Fragment)		250.019	250.019	250.019	250.019	250.019	250.019	250.019	250.019	250.019	250.019	28163.5	5640.06	250.019	12759.1	250.019	12145.2	3770.11	2691.78	250.019	250.019	0.0370178	6616.98	8939.04	2826.77	135.092	250.019	0	0	0	0.0377845	-4.72606	0.161843	Down
A0A7S5ETU3		IGH c1096_heavy_IGHV5-51_IGHD5-24_IGHJ4 (Fragment)		956134	17568.8	2860138	250.019	5843129	78670.2	6.01902e+06	9837520	5862019	1.18955e+06	986502	250.019	250.019	250.019	447930	452230	113133	1.6326e+06	847894	846977	0.0225144	532802	543041	171725	101.922	3.2664e+06	3.42107e+06	1.08184e+06	104.735	6.13061	2.61603	0.123571	Up
A0A7S5ETX8		IGH c135_heavy_IGHV3-13_IGHD5-18_IGHJ3 (Fragment)		36328	250.019	250.019	29562.5	30563.6	51111.1	70615.4	45581.3	13055.5	74411.6	250.019	250.019	250.019	250.019	63747.9	250.019	17327.8	250.019	250.019	250.019	0.0191722	8307.58	20205.6	6389.56	243.218	35172.9	26120.8	8260.11	74.2639	4.23383	2.08196	0.114873	Up
A0A7S5EU37		IGH c1531_heavy_IGHV1-69_IGHD3-22_IGHJ4 (Fragment)		272789	511128	250.019	585192	580970	87058.7	250.019	448922	106110	321574	250.019	250.019	250.019	250.019	250.019	250.019	250.019	250.019	337336	331792	0.0180327	67112.8	140965	44577.1	210.042	291424	233366	73796.9	80.0779	4.34231	2.11846	0.111619	Up
A0A7S5EUJ7		IGH c990_heavy_IGHV3-43_IGHD2-21_IGHJ4 (Fragment)		1442.39	250.019	250.019	14885.3	687.187	42122	250.019	66500.2	250.019	47370.5	250.019	250.019	250.019	250.019	250.019	250.019	250.019	250.019	250.019	1919.07	0.0457988	416.925	527.801	166.905	126.594	17400.8	25026.7	7914.13	143.825	41.736	5.38322	0.182182	Up
A0A7S5EUL2		IGH c1050_heavy_IGHV5-51_IGHD6-25_IGHJ4 (Fragment)		857792	521229	565609	1.20614e+06	332713	398729	847034	477906	658001	537211	446123	490898	487949	229363	634944	345469	485423	135338	475783	107692	0.0190578	383898	173638	54909.1	45.2302	640237	262520	83016.3	41.0037	1.66772	0.737881	0.114666	Up
A0A7S5EUP5		IGH c2491_heavy_IGHV3-23_IGHD5-12_IGHJ3 (Fragment)		355038	483185	79167.9	349314	607448	752790	254320	278433	358261	233212	250.019	20883.7	624786	26925.2	12433.3	24083.1	20423	7756.88	32546.9	308762	0.00768231	107885	203506	64354.2	188.632	375117	194739	61581.8	51.9142	3.47701	1.79785	0.0669525	Up
A0A7S5EUR6		IGH c1260_heavy_IGHV5-51_IGHD5-24_IGHJ2 (Fragment)		659761	250.019	273843	14742.1	250.019	767722	402067	1.25687e+06	1.14386e+06	668490	984810	1.63871e+06	1.64785e+06	1.60978e+06	743654	1296151	1.10326e+06	250.019	1030189	499508	0.027271	1.05542e+06	535828	169444	50.7693	518785	460094	145494	88.6868	0.491546	-1.0246	0.135929	Down
A0A7S5EUZ7		IGH c2881_heavy_IGHV3-48_IGHD6-13_IGHJ4 (Fragment)		250.019	34348.7	9660.1	29331.2	13010.6	58839.9	34540.2	52119.9	53414.6	54912.1	250.019	14279.4	250.019	250.019	23809.3	6708.99	7790.08	250.019	48244.5	18900.2	0.0153563	12073.3	15289.2	4834.88	126.637	34042.7	20959.8	6628.08	61.5692	2.81968	1.49553	0.104054	Up
A0A7S5EVF8		IGH c2107_heavy_IGHV5-51_IGHD2-2_IGHJ4 (Fragment)		450603	674985	198843	616406	250.019	158334	278800	442032	279940	229441	656924	657496	749506	925770	535889	1.11288e+06	659630	968803	127887	94218.1	0.0206339	648901	332758	105227	51.2802	332963	210475	66558.1	63.2127	0.513119	-0.962635	0.118983	Down
A0A7S5EVR2		IGH c2565_heavy_IGHV3-43_IGHD3-16_IGHJ3 (Fragment)		250.019	250.019	250.019	250.019	250.019	250.019	250.019	250.019	250.019	250.019	7657.7	105923	250.019	3555.04	35132.3	58202.5	19244.6	69375.7	250.019	250.019	0.019529	29984	36675.4	11597.8	122.316	250.019	0	0	0	0.00833841	-6.90601	0.116446	Down
A0A7S5EW28		IGH c1667_heavy_IGHV1-18_IGHD2-15_IGHJ3 (Fragment)		250.019	250.019	105964	250.019	250.019	250.019	250.019	250.019	250.019	250.019	92978.3	313315	250.019	250.019	266779	79610.2	250.019	197363	79795.8	250.019	0.0276444	103084	117083	37025	113.58	10821.4	33429.6	10571.4	308.922	0.104976	-3.25187	0.136373	Down
A0A7S5EW44		IGH c93_heavy_IGHV4-39_IGHD5-12_IGHJ4 (Fragment)		296267	7142.47	350681	1171931	611822	662125	1.49134e+06	555665	669450	1010905	10518.9	250.019	34881.2	88566.1	409942	53325.2	15385	49144.1	55541.1	459428	0.00133142	117698	169427	53577.5	143.95	682732	439528	138991	64.3778	5.8007	2.53623	0.0229291	Up
A0A7S5EW76		IGH c824_heavy_IGHV4-39_IGHD3-9_IGHJ5 (Fragment)		250.019	759.642	250.019	1258.18	250.019	1837.9	1680.69	1096.33	250.019	250.019	41920.4	20942.4	17594.6	25384.8	19047.6	30363.4	9591.38	59738.4	250.019	250.019	0.00149364	22508.3	18346	5801.5	81.5075	788.284	637.987	201.749	80.9336	0.0350219	-4.8356	0.025121	Down
A0A7S5EX74		IGH c2957_heavy_IGHV3-33_IGHD6-13_IGHJ4 (Fragment)		1.51132e+06	1.79979e+06	523722	15718.1	1.82091e+06	61751	1.21885e+06	974425	887445	2.15255e+06	325856	250.019	3054.36	250.019	281788	6037.27	230200	635446	1.17982e+06	812059	0.0117848	347476	406398	128514	116.957	1.09665e+06	741407	234453	67.6066	3.15604	1.65812	0.0889232	Up
A0A7S5EXB6		IGH c3092_heavy_IGHV3-48_IGHD3-9_IGHJ5 (Fragment)		1.04963e+06	517085	685260	538998	559424	654006	497790	177699	326582	142560	13942	41747.7	853141	11935.3	28301.7	78266.9	133814	36367.7	488724	698336	0.0487281	238458	318676	100774	133.64	514904	263519	83331.9	51.1782	2.15931	1.11057	0.189126	Up
A0A7S5EXF6		IGH c3227_heavy_IGHV1-18_IGHD3-10_IGHJ4 (Fragment)		456931	557597	417457	601148	374334	667464	329427	728963	562901	620456	61490.3	250.019	250.019	250.019	131306	50665.1	85513.8	327493	455181	63493.6	4.25214e-06	117589	153153	48431.2	130.244	531668	131660	41634.6	24.7636	4.5214	2.17677	0.000985405	Up
A0A7S5EXU4		IGH c2789_heavy_IGHV4-39_IGHD5-12_IGHJ4 (Fragment)		250.019	250.019	250.019	250.019	250.019	250.019	250.019	250.019	250.019	250.019	56890.9	250.019	39385.2	21372.1	152013	250.019	84954.6	183285	250.019	250.019	0.0205027	53890.1	66768.2	21114	123.897	250.019	0	0	0	0.00463943	-7.75184	0.118983	Down
A0A7S5EXW0		IGH c2879_heavy_IGHV2-5_IGHD3-22_IGHJ4 (Fragment)		250.019	250.019	250.019	250.019	250.019	250.019	250.019	250.019	250.019	250.019	23171.1	250.019	8442.86	20871	250.019	21642.5	25798.2	250.019	250.019	250.019	0.0130265	10117.6	11325.4	3581.41	111.938	250.019	0	0	0	0.0247114	-5.33868	0.0943685	Down
A0A7S5EXZ6		IGH c4052_heavy_IGHV3-23_IGHD1-26_IGHJ5 (Fragment)		21930800	33733988	16064329	31392844	32184604	25396586	19718922	17082874	7783184	20589296	21027612	5414821	146538	217209	15558963	41429016	251766	182433	14021394	12806735	0.0308976	1.11056e+07	1.31544e+07	4.15979e+06	118.448	2.25877e+07	8.20871e+06	2.59582e+06	36.3415	2.0339	1.02425	0.144647	Up
A0A7S5EY66		IGH c2306_heavy_IGHV3-33_IGHD1-26_IGHJ3 (Fragment)		1.75967e+06	1.59608e+06	977665	4.01296e+06	1.2156e+06	1.69168e+06	886396	2.11527e+06	663965	2.30821e+06	1.33826e+06	339101	437114	812718	861126	610372	693742	1288406	891759	266733	0.00823504	753933	364402	115234	48.3335	1.72275e+06	965697	305380	56.0555	2.28502	1.1922	0.070488	Up
A0A7S5EYH4		IGH c3854_heavy_IGHV5-51_IGHD3-10_IGHJ3 (Fragment)		250.019	250.019	250.019	250.019	250.019	250.019	250.019	250.019	250.019	250.019	250.019	52739.7	70083.4	52275.1	109818	119157	250.019	58844.1	250.019	250.019	0.0048815	46391.8	45491.4	14385.7	98.0593	250.019	0	0	0	0.0053893	-7.53569	0.0503197	Down
A0A7S5EYX3		IGH c3903_heavy_IGHV3-23_IGHD4-23_IGHJ6 (Fragment)		61521.6	250.019	38131.5	86309.6	33386.9	31042.7	14735.9	75667.7	48385	78575.8	12520.5	4157.69	5384.93	16867.7	11020.8	27319.5	6952.4	5835.6	75817	2383.13	0.016957	16825.9	22011.5	6960.64	130.819	46800.7	28522.2	9019.51	60.944	2.78146	1.47584	0.108261	Up
A0A7S5EZ08		IGH c4032_heavy_IGHV1-69_IGHD5-12_IGHJ3 (Fragment)		347048	352782	161407	347160	397885	213571	397699	455365	148879	382136	181168	113156	14152.7	48495.8	46816	19795.3	100299	85839.1	85048.7	261484	3.79889e-05	95625.6	76270.9	24119	79.7599	320393	106766	33762.4	33.3235	3.3505	1.74437	0.00341425	Up
A0A7T0LN43		Immunglobulin heavy chain variable region (Fragment)		1.08141e+06	452353	178966	315640	219887	728611	173342	639200	701046	394582	409176	450819	441826	25191.6	176631	236371	124608	192635	81563.7	164907	0.02441	230373	152514	48229	66.2029	488504	295218	93356.1	60.4331	2.12049	1.0844	0.127288	Up
A0A7T0LNA7		Immunglobulin heavy chain variable region (Fragment)		250.019	250.019	250.019	250.019	250.019	250.019	247329	250.019	325589	250.019	957714	1.24426e+06	1.08778e+06	597907	2168725	898270	1.18808e+06	1.76321e+06	250.019	250.019	0.000491369	990645	685005	216618	69.1474	57491.8	122078	38604.5	212.34	0.0580348	-4.10694	0.0140355	Down
A0A7T0LNM7		Immunglobulin heavy chain variable region (Fragment)		1.97381e+06	250.019	1.20747e+06	2.32058e+06	250.019	1.69274e+06	1.89751e+06	2.008e+06	1.91624e+06	1.20385e+06	4.98784e+06	3.96034e+06	5.37912e+06	3.68482e+06	42471.9	4.49334e+06	4258336	11828993	932628	1.0104e+06	0.0250612	4.05783e+06	3.3092e+06	1.04646e+06	81.5509	1.42207e+06	825657	261096	58.0602	0.350451	-1.51271	0.128707	Down
A0A7T0LNP3		Immunglobulin heavy chain variable region (Fragment)		21340.7	29598.6	250.019	64041.3	77135.6	250.019	82302.4	63713.5	67091.5	34640.9	365111	307927	218183	463606	261645	544487	582874	5947.78	29670.5	47103.9	0.00231953	282656	210692	66626.6	74.5401	44036.5	30777.1	9732.58	69.8901	0.155796	-2.68227	0.0326131	Down
A0A7T0LNV8		Immunglobulin lambda chain variable region (Fragment)		384352	250.019	250.019	250.019	250.019	250.019	250.019	250.019	250.019	250.019	1788306	477144	512198	247326	1.45231e+06	372352	823516	4907224	185597	250.019	0.0379828	1.07662e+06	1.46057e+06	461873	135.662	38660.3	121464	38410.2	314.183	0.0359088	-4.79952	0.163286	Down
A0A7T0PXM4		Immunglobulin kappa chain variable region (Fragment)		434381	553044	484909	250.019	282756	250.019	502920	424536	1.4109e+06	250.019	250.019	250.019	250.019	250.019	362448	250.019	250.019	250.019	296340	135388	0.0286911	79592.6	139111	43990.7	174.779	409420	415959	131538	101.597	5.14395	2.36288	0.139149	Up
A0A7T0PXX9		Immunglobulin kappa chain variable region (Fragment)		1.94371e+06	1.03009e+06	1.12205e+06	670554	1.08584e+06	1.27392e+06	1.29945e+06	737420	1251530	658603	570403	4074.43	130187	734787	347658	313136	236668	359478	270105	498666	3.2502e-05	346516	212729	67270.8	61.3907	1.10732e+06	383056	121133	34.5932	3.19557	1.67607	0.00332827	Up
A0A7T0PY07		Immunglobulin kappa chain variable region (Fragment)		1.79331e+06	365166	1.5879e+06	1.21452e+06	1.46326e+06	1.29083e+06	1.45813e+06	2022063	1.69165e+06	1.46416e+06	472806	609426	729493	353215	1.3893e+06	654796	269483	1.49521e+06	1917702	843416	0.0212292	873484	545509	172505	62.4521	1.4351e+06	444523	140570	30.9751	1.64296	0.716298	0.120351	Up
A0A7T0PYP0		Immunglobulin kappa chain variable region (Fragment)		1.63008e+06	323297	1.22204e+06	244550	797651	298083	741091	1.0643e+06	508405	433569	2.12525e+06	700306	979258	1.51454e+06	1.62549e+06	1.32329e+06	1.61606e+06	2244654	850801	318404	0.0233477	1.32981e+06	618668	195640	46.5232	726307	458641	145035	63.1471	0.546175	-0.872564	0.125043	Down
A0A7T0PYP4		Immunglobulin heavy chain variable region (Fragment)		259730	341548	221995	266288	411796	450234	594614	244545	739905	329673	122446	250.019	250.019	63297.1	407635	352783	2080.89	401643	205776	149720	0.00977927	170588	164891	52143	96.6601	386033	168619	53322	43.6799	2.26295	1.17821	0.0802812	Up
A0A7T0PYT2		Immunglobulin kappa chain variable region (Fragment)		35015.4	250.019	42770.5	250.019	250.019	250.019	250.019	49141	57316.6	47127.8	250.019	250.019	250.019	250.019	250.019	250.019	250.019	250.019	250.019	16813.7	0.0160358	1906.38	5237.88	1656.36	274.755	23262.1	24867.4	7863.77	106.901	12.2022	3.60907	0.105518	Up
A0A7U3M537		IGH c4194_heavy_IGHV3-30_IGHD2-21_IGHJ6 (Fragment)		177884	143761	55769.4	51701	62484.4	250.019	69633.9	105529	250.019	264701	16538.9	250.019	250.019	7596.46	16116.3	250.019	15891.9	101645	250.019	250.019	0.0124971	15903.9	30995	9801.49	194.89	93196.4	82458	26075.5	88.4777	5.85998	2.5509	0.0916881	Up
A0A7U3M562		IGH c4210_heavy_IGHV3-43_IGHD3-10_IGHJ5 (Fragment)		115944	49310	34963.2	80660.3	68247.4	19306.1	5378.15	59868.9	58110	99443.6	248156	301428	463952	571428	150731	856939	8515.35	29697.4	65921.7	33395.9	0.028189	273016	281330	88964.5	103.045	59123.1	34249	10830.5	57.9282	0.216555	-2.20719	0.138112	Down
A0A7U3M5I1		IGH c4208_heavy_IGHV3-30_IGHD3-3_IGHJ4 (Fragment)		102958	84868	39916	250.019	135790	51470.6	54661.9	66014.1	52182	130138	12638.7	250.019	250.019	250.019	250.019	250.019	250.019	26782.7	64739.6	26100.3	0.0009542	13176.1	21118.1	6678.13	160.275	71824.9	42033.1	13292	58.5216	5.45113	2.44656	0.0191298	Up
P00740	F9	Coagulation factor IX	2158	421114	479142	314370	384437	305389	390738	349571	423131	246886	405030	320046	120513	207799	114683	296417	152898	423688	289446	245784	236128	0.00254864	240740	96852.9	30627.6	40.2313	371981	68327.2	21607	18.3685	1.54516	0.627753	0.0344698	Up
A0N5G7	IGHV3-75	Rheumatoid factor D5 heavy chain (Fragment)	28407	250.019	250.019	250.019	250.019	250.019	250.019	250.019	250.019	250.019	250.019	32931.1	83617.9	83778	250.019	73799.2	97198.5	250.019	45453	250.019	250.019	0.00434533	41777.8	40278.8	12737.3	96.412	250.019	0	0	0	0.00598451	-7.38455	0.0468035	Down
P07477	PRSS1	Serine protease 1	5644	379592	630493	377226	599186	387257	783610	607064	481950	294743	250.019	250.019	250.019	250.019	250.019	250.019	250.019	505540	656465	358878	390500	0.0246346	191288	258605	81778.1	135.191	454137	219144	69299.5	48.2551	2.3741	1.24738	0.127656	Up
A2IPI6		HRV Fab 027-VL (Fragment)		4.30632e+06	1.63952e+06	3.08288e+06	4.27937e+06	2.42973e+06	2.03303e+06	2.77299e+06	7908647	3.0572e+06	2241281	1426528	1.098e+06	681652	1.72093e+06	756084	669709	134129	1.51994e+06	2.1704e+06	2732737	0.00374712	1.29101e+06	783624	247804	60.6986	3.3751e+06	1.81902e+06	575226	53.8954	2.61431	1.38643	0.0426081	Up
A2J1N7		Rheumatoid factor RF-ET10 (Fragment)		628672	541784	495960	557959	331614	208584	380028	335241	586820	430471	846973	1.21925e+06	411920	774652	690852	1.11175e+06	622101	637308	438627	378750	0.0164367	713218	284639	90010.7	39.9091	449713	134816	42632.6	29.9782	0.630541	-0.665338	0.107436	Down
A2MYC9	IGLV5-48	V4-3 protein (Fragment)	28780	132629	237459	250.019	180823	142485	250.019	83926.4	2790.59	250.019	110874	222899	459692	547991	283324	937443	460317	250.019	250.019	133721	215621	0.0216672	326151	285363	90239.8	87.4943	89173.6	86153	27244	96.6127	0.273412	-1.87085	0.121472	Down
A2NZ55		Variable immnoglobulin anti-estradiol heavy chain (Fragment)		472463	208110	345566	347322	244623	468713	290149	611.695	236143	218916	731861	1.15614e+06	1.72453e+06	814463	284503	1499689	1.88499e+06	339863	177838	184908	0.0111318	879879	652542	206352	74.1627	283262	138088	43667.2	48.7492	0.321933	-1.63517	0.085831	Down
A8K5J8		Complement subcomponent C1r		250.019	250.019	250.019	250.019	250.019	250.019	250.019	250.019	250.019	250.019	353002	209779	2171977	656905	288995	530464	315699	250.019	250.019	250.019	0.0393367	452757	643973	203642	142.234	250.019	0	0	0	0.000552215	-10.8225	0.166371	Down
O75821	EIF3G	Eukaryotic translation initiation factor 3 subunit G	8666	250.019	250.019	250.019	250.019	250.019	250.019	250.019	250.019	250.019	250.019	56756.8	412947	570442	252467	96387.7	270154	32866.3	46532.9	250.019	250.019	0.011816	173905	196067	62001.7	112.743	250.019	0	0	0	0.00143767	-9.44205	0.0889232	Down
A8K5T0		cDNA FLJ75416, highly similar to Homo sapiens complement factor H (CFH), mRNA		4367215	5227191	5.69717e+06	3.74309e+06	4665937	5174357	4.3111e+06	4514595	4.1209e+06	3.96028e+06	7444189	9348949	11552035	8822532	5916451	8024206	6983056	6.1798e+06	4270269	3840067	0.00274913	7.23816e+06	2.34575e+06	741792	32.4082	4.57818e+06	618659	195637	13.5132	0.632507	-0.660847	0.0354551	Down
Q03591	CFHR1	Complement factor H-related protein 1	3078	250.019	57049.8	250.019	250.019	3366.29	7032.08	235709	250.019	250.019	250.019	250.019	629098	1.21084e+06	700590	250.019	822135	250.019	66409.4	250.019	250.019	0.0455871	343032	454158	143617	132.395	30465.7	74231.6	23474.1	243.656	0.088813	-3.49309	0.181591	Down
Q9Y5Y7	LYVE1	Lymphatic vessel endothelial hyaluronic acid receptor 1	10894	248846	150522	220898	119378	131878	156322	263853	116583	178811	185256	500987	178479	271420	187510	440874	186418	460282	514048	183073	158709	0.018624	308180	151237	47825.3	49.0742	177235	52533.8	16612.7	29.6408	0.575101	-0.798112	0.113473	Down
B2R701		cDNA, FLJ93202, Homo sapiens protease inhibitor 16 (PI16), mRNA		167559	85784.2	260605	293340	154457	157525	125911	74452.6	83952	84284.4	654594	187434	234771	257189	235149	504031	474895	946743	122634	162305	0.016826	377975	264326	83587.2	69.9322	148787	76188.5	24092.9	51.2064	0.393643	-1.34504	0.108261	Down
B2R8I2		cDNA, FLJ93914, highly similar to Homo sapiens histidine-rich glycoprotein (HRG), mRNA		5478498	3.49221e+06	5.12826e+06	4459906	4.00811e+06	6387596	4969663	4.17704e+06	2.88289e+06	3.8696e+06	10200399	5.55323e+06	8924292	7729766	10358880	8684696	7909196	10651554	4461104	4.4077e+06	0.000562695	7.88808e+06	2.36011e+06	746332	29.9199	4.48538e+06	1.02792e+06	325057	22.9172	0.568627	-0.814445	0.0147119	Down
B2RAF2		cDNA, FLJ94875		5.77248e+06	8.09289e+06	4221157	8880286	4.89222e+06	6448505	8293009	10914526	9337505	6259100	250.019	4403697	4102823	250.019	4567771	250.019	250.019	250.019	6284524	7.72964e+06	0.000991078	2.70897e+06	3.03585e+06	960021	112.067	7.31117e+06	2.12774e+06	672851	29.1026	2.69887	1.43236	0.0191298	Up
P55103	INHBC	Inhibin beta C chain	3626	250.019	250.019	250.019	250.019	250.019	250.019	250.019	250.019	250.019	250.019	122841	59990.6	67029.7	21201	250.019	35174	250.019	250.019	250.019	15726.5	0.0219069	32296.3	40394.7	12773.9	125.075	250.019	0	0	0	0.00774142	-7.01319	0.121788	Down
Q13790	APOF	Apolipoprotein F	319	2835388	1.02737e+06	1826054	1.50592e+06	1.18085e+06	2.02322e+06	2126174	824642	1266546	1260150	3591249	2.93827e+06	2418916	2.49359e+06	2.75509e+06	3.11228e+06	5367248	2.06553e+06	2123862	1.31719e+06	0.0061116	2.81832e+06	1.09375e+06	345874	38.8085	1.58763e+06	612104	193564	38.5545	0.563325	-0.82796	0.0577977	Down
Q86UW6	N4BP2	NEDD4-binding protein 2	55728	982172	303394	1.25765e+06	1.63939e+06	1.0438e+06	908406	1.2358e+06	754913	1.50379e+06	594187	250.019	250.019	250.019	250.019	250.019	250.019	250.019	250.019	1118661	1.51637e+06	0.00286608	263703	563264	178120	213.597	1.02235e+06	408282	129110	39.9357	3.87689	1.9549	0.0365541	Up
P68371	TUBB4B	Tubulin beta-4B chain	10383	178647	108438	115808	41077.6	49283.5	237993	250.019	67685.6	149947	90954.4	77705.8	42477.9	250.019	250.019	114722	250.019	250.019	250.019	13229.9	51796.7	0.0102565	30118.2	40539.2	12819.6	134.6	104008	70712.7	22361.3	67.9875	3.45334	1.78799	0.0826264	Up
B3KW67		cDNA FLJ42347 fis, clone UTERU2003399, highly similar to Actin, gamma-enteric smooth muscle		1.82728e+06	961517	2056116	1.12522e+06	675244	1.47755e+06	551180	569809	769659	496926	1.51414e+06	780798	778393	188700	250.019	278497	250.019	250.019	660722	1.01553e+06	0.0406677	521754	512828	162170	98.2893	1.05105e+06	559468	176919	53.2295	2.01446	1.01039	0.170248	Up
B4DHZ6	TF	Transferrin, isoform CRA_c	7018	250.019	250.019	250.019	250.019	26345.2	250.019	250.019	250.019	250.019	250.019	21136.9	33969.7	24356.5	31724.9	20137.2	24849	12678	18944.4	250.019	250.019	0.0022341	18829.7	11535.4	3647.8	61.2617	2859.54	8252.02	2609.52	288.579	0.151863	-2.71915	0.0321031	Down
B4DPR2		cDNA FLJ50830, highly similar to Serum albumin		170335488	145069392	239187024	138740800	97745720	176438432	183056624	90772944	68640792	121460544	29529942	35745648	36867644	18427464	39874572	79611816	34439584	53935804	182507440	171622848	0.00745299	6.82563e+07	5.96712e+07	1.88697e+07	87.4224	143144776	5.11131e+07	1.61634e+07	35.7072	2.09717	1.06844	0.0661568	Up
P48735	IDH2	Isocitrate dehydrogenase [NADP], mitochondrial	3418	855239	542376	928093	2223203	1.22025e+06	964588	381666	1.13756e+06	602622	477989	250.019	250.019	250.019	250.019	250.019	250.019	250.019	250.019	1626736	1.62086e+06	0.0398473	324959	684549	216473	210.657	933358	534248	168944	57.2393	2.87223	1.52217	0.167791	Up
P61769	B2M	Beta-2-microglobulin	567	102152	12387.6	665.509	250.019	13839.8	20834.4	250.019	54055.4	250.019	129301	334214	110732	64092	183850	167728	59816.2	179136	278217	56852.9	34183.4	0.00469547	146882	100957	31925.5	68.7335	33398.5	46786.5	14795.2	140.085	0.227383	-2.1368	0.0487858	Down
B4E1B2		Serotransferrin		20346148	1.84249e+06	16524180	12683946	1.21502e+06	5.12868e+06	17783198	5.74154e+06	15228550	3.63421e+06	1.35874e+06	987437	3.44746e+06	587324	1.44005e+06	5138255	4180535	631246	3754238	35936.3	0.00369468	2.15612e+06	1.79533e+06	567733	83.2666	1.00128e+07	7.2329e+06	2.28724e+06	72.2366	4.64389	2.21533	0.0425365	Up
P01042	KNG1	Kininogen-1	3827	2.37232e+06	2.51941e+06	2.46446e+06	1.59369e+06	2.05014e+06	2.46998e+06	1.99754e+06	1.32265e+06	1.89886e+06	1.74204e+06	10101240	5666764	3.86653e+06	9103012	4688619	5347131	7.51386e+06	4.83395e+06	2.84613e+06	1.99618e+06	0.000477265	5.59634e+06	2.6089e+06	825006	46.6179	2.04311e+06	412258	130367	20.178	0.365079	-1.45372	0.0140063	Down
B4E1D8		cDNA FLJ51597, highly similar to C4b-binding protein alpha chain		4.3204e+06	4850524	4526556	3.85471e+06	5.3356e+06	5300078	5683649	3.93273e+06	4.75512e+06	3.89582e+06	6.70513e+06	11282198	9616307	9735093	7451159	10185473	9824965	7735722	4.73106e+06	3.72432e+06	0.000475575	8.09914e+06	2.48148e+06	784711	30.6387	4.64552e+06	654196	206875	14.0823	0.573582	-0.801929	0.0140063	Down
B4E1E1		cDNA FLJ51598, highly similar to C4b-binding protein alpha chain		250.019	853763	250.019	250.019	250.019	2.02587e+06	3.24026e+06	250.019	250.019	1.36359e+06	3.84669e+06	2300952	3.79756e+06	2.81448e+06	6684522	4449353	3.55273e+06	2.95995e+06	250.019	250.019	0.00544771	3.04067e+06	1.99555e+06	631048	65.6285	748498	1.13476e+06	358844	151.605	0.246162	-2.02232	0.0534485	Down
Q9UHG3	PCYOX1	Prenylcysteine oxidase 1	51449	79260.6	98073.2	120872	65302.1	96921.6	111304	121661	70878.2	55956.1	68816.4	15193.8	250.019	11723	250.019	46730	4701.38	42159.2	23282.8	87326.8	33893.5	3.62569e-05	26551.1	27118.8	8575.71	102.138	88904.5	24058.1	7607.83	27.0606	3.34844	1.74349	0.0033637	Up
C9JB55	TF	Serotransferrin (Fragment)	7018	458878	753785	695194	423806	821650	480761	307263	462797	516510	462132	286593	293477	158987	236034	62227	255477	325092	68479.5	918620	643765	0.0437037	324875	264916	83773.8	81.544	538278	163102	51577.3	30.3007	1.65688	0.728465	0.17728	Up
C9JPQ9	FGG	Fibrinogen gamma chain (Fragment)	2266	8.11079e+06	8809863	5.25385e+06	6.71105e+06	4737714	7.12933e+06	6.64841e+06	6.30129e+06	6767852	5.40327e+06	2.12914e+06	3.33509e+06	8.10487e+06	7015159	2.10207e+06	6422168	2.72367e+06	2.64847e+06	4356343	3.82353e+06	0.00897506	4.26605e+06	2.16688e+06	685228	50.7936	6.58734e+06	1.26003e+06	398456	19.128	1.54413	0.626795	0.0752544	Up
C9JVG0	TF	Serotransferrin (Fragment)	7018	250321	262969	319539	446054	380854	282052	269144	291176	262129	262854	340462	1.18489e+06	668509	1.70924e+06	393655	1.11798e+06	338167	325947	379413	268882	0.0306939	672714	494921	156508	73.5708	302709	63406	20050.7	20.9462	0.449982	-1.15206	0.144477	Down
P39060	COL18A1	Collagen alpha-1(XVIII) chain	80781	250.019	250.019	250.019	250.019	250.019	250.019	250.019	250.019	250.019	11523.1	65458.1	250.019	250.019	20182.2	150847	67537.5	60157.3	48757.5	250.019	250.019	0.0173287	41394	48154.9	15227.9	116.333	1377.33	3564.87	1127.31	258.825	0.0332737	-4.90947	0.109533	Down
F6KPG5		Albumin (Fragment)		184527	584927	41441.2	855104	790947	635548	293178	163978	196422	198429	7592.18	106376	250.019	10237.7	250.019	115311	52429.2	9807.44	126777	397230	0.00609016	82626.2	121662	38472.8	147.243	394450	293166	92707.3	74.3227	4.77391	2.25517	0.0577977	Up
P26927	MST1	Hepatocyte growth factor-like protein	4485	296144	174093	276841	242101	281246	281022	271430	235902	262549	231451	435508	403506	534648	424405	380744	381597	453391	361214	253251	224312	0.000555515	385258	91464.1	28923.5	23.741	255278	35736	11300.7	13.9989	0.662616	-0.593754	0.0146669	Down
Q9HDC9	APMAP	Adipocyte plasma membrane-associated protein	57136	19213.1	5551	52400.5	72068.8	58640.2	61303.4	67181.1	26245.4	55989.9	65014.8	141542	174686	63098.2	126726	63456.3	170985	126111	282181	34465.9	30269.3	0.0105785	121352	77620	24545.6	63.9626	48360.8	22883	7236.24	47.3172	0.398516	-1.32729	0.0842761	Down
P54108	CRISP3	Cysteine-rich secretory protein 3	10321	181769	121656	102853	194826	121512	142066	104594	149604	104489	250.019	930120	310382	600740	969127	563394	932453	730653	250.019	150909	189708	0.00189038	537774	357312	112992	66.4429	122362	53581.5	16944	43.7894	0.227534	-2.13585	0.0295475	Down
O60234	GMFG	Glia maturation factor gamma	9535	167119	250.019	250.019	251317	146405	286556	168148	144943	250.019	250.019	250.019	250.019	250.019	250.019	250.019	250.019	250.019	250.019	250.019	189203	0.023853	19145.3	59752	18895.2	312.098	116549	109587	34654.5	94.0268	6.0876	2.60587	0.125874	Up
P00488	F13A1	Coagulation factor XIII A chain	2162	625449	327749	200170	203424	157852	321530	170512	154304	173797	180665	898202	325490	754109	352788	716756	506295	1.17541e+06	290404	145195	151516	0.0288402	531616	343143	108511	64.5471	251545	145806	46107.8	57.964	0.47317	-1.07957	0.139637	Down
P01833	PIGR	Polymeric immunoglobulin receptor	5284	704497	795151	404112	566141	686656	1.20962e+06	897335	814690	739741	696890	530770	87173.6	92664.7	86739.4	500486	91365.8	67747.5	152800	574180	690216	0.000301675	287414	252148	79736.3	87.7299	751483	211243	66800.8	28.1101	2.61464	1.38661	0.0107113	Up
P02671	FGA	Fibrinogen alpha chain	2243	24932492	29685158	18430798	20234516	17386324	26318272	21529650	19099922	21892572	20165110	43420308	52057596	72493560	44310924	45228464	56009156	42018648	47331984	21855246	22089590	0.000195273	4.46815e+07	1.49213e+07	4.71853e+06	33.3948	2.19675e+07	3.87944e+06	1.22679e+06	17.6599	0.491645	-1.02431	0.00883958	Down
P02675	FGB	Fibrinogen beta chain	2244	41992276	43714108	32753776	30418062	29291830	41788624	31997338	29222072	32584186	30118628	75298488	71698416	128295912	65361032	86797752	91302656	85064600	76715480	34169332	28879650	0.000372086	7.43583e+07	2.83699e+07	8.97135e+06	38.153	34388090	5.75283e+06	1.81921e+06	16.7291	0.462465	-1.11259	0.0124303	Down
P02741	CRP	C-reactive protein	1401	18558494	1.36705e+06	7.37609e+06	4.22004e+06	3.91908e+06	1847413	250.019	1.66235e+06	4943835	4.57511e+06	250.019	250.019	250.019	250.019	250.019	465688	250.019	1.42165e+06	250.019	250.019	0.0123092	188934	457165	144568	241.971	4.84697e+06	5.27551e+06	1.66826e+06	108.841	25.6543	4.68113	0.0907722	Up
P02751	FN1	Fibronectin	2335	1.20828e+06	2.02647e+06	1.06878e+06	978025	436631	673545	442336	863660	440044	535768	514001	250.019	1.1195e+06	250.019	345043	721053	607916	157631	584990	444726	0.0420198	449536	344807	109037	76.7028	867354	495411	156663	57.1175	1.92944	0.948184	0.172867	Up
P02776	PF4	Platelet factor 4	5196	7.79793e+06	1.00729e+06	4880575	2359965	1050437	1.79441e+06	1.95325e+06	1.5329e+06	864406	1.29037e+06	164463	634169	294813	451035	1086350	418369	224442	842400	1.46609e+06	903863	0.0206442	648600	420892	133098	64.8924	2.45315e+06	2.20939e+06	698671	90.0633	3.78223	1.91924	0.118983	Up
P03950	ANG	Angiogenin	283	250.019	98507.9	90199.1	162412	64714.9	183493	50183.9	214526	250.019	250.019	430544	606601	470352	250.019	325004	388175	204779	454572	104212	130944	0.00314053	311543	193464	61178.8	62.0986	86478.7	78760.9	24906.4	91.0755	0.277581	-1.84902	0.0384351	Down
P05160	F13B	Coagulation factor XIII B chain	2165	301043	516849	417869	340487	309330	460180	376100	317542	293752	327892	1.36837e+06	1.21901e+06	1.78471e+06	1.04241e+06	1.53709e+06	786565	1.90988e+06	1.17438e+06	250209	272135	0.000492901	1.13448e+06	568104	179650	50.0763	366104	75659.9	23925.8	20.6662	0.322708	-1.6317	0.0140355	Down
P0DJI9	SAA2	Serum amyloid A-2 protein	6289	5.81317e+06	250.019	6.47883e+06	11445702	2883537	2.13628e+06	250.019	4.04975e+06	12999930	2.06927e+06	250.019	250.019	250.019	250.019	250.019	345860	250.019	423007	250.019	250.019	0.00374529	77086.7	163003	51546.2	211.455	4.7877e+06	4.47351e+06	1.41465e+06	93.4377	62.1079	5.95671	0.0426081	Up
P0DOX6		Immunoglobulin mu heavy chain		250.019	250.019	250.019	250.019	250.019	250.019	250.019	250.019	250.019	250.019	250.019	1.16954e+06	900123	766716	1910806	3.20265e+06	769234	975956	250.019	250.019	0.00622201	969577	989806	313004	102.086	250.019	0	0	0	0.000257864	-11.9211	0.0582883	Down
P19652	ORM2	Alpha-1-acid glycoprotein 2	5005	19487358	16636152	16286447	12921353	18722964	23187028	15327975	15262576	10748859	17466788	16966864	42067572	41854368	28194424	11977660	41228572	22996286	16319008	14220588	15828284	0.0483829	2.51654e+07	1.23039e+07	3.89083e+06	48.8922	16604750	3.46825e+06	1.09676e+06	20.8871	0.659826	-0.599843	0.188294	Down
P21333	FLNA	Filamin-A	2316	239406	441446	217111	133507	109657	180958	78954	367250	69255.3	69693	223961	250.019	78418.7	250.019	250.019	90434.8	250.019	250.019	181599	98017.3	0.0201004	67368.1	82790	26180.5	122.892	190724	128636	40678.4	67.4464	2.83107	1.50135	0.118525	Up
P23142	FBLN1	Fibulin-1	2192	630286	527169	652703	545368	494256	683746	356658	401910	619801	484037	1.19101e+06	880606	758105	1.42947e+06	1.08223e+06	883411	1.15269e+06	1.4043e+06	490952	679749	0.000350853	995253	309533	97882.9	31.1009	539593	108517	34316.1	20.1109	0.542167	-0.883191	0.0118712	Down
P25786	PSMA1	Proteasome subunit alpha type-1	5682	241182	132363	229348	307998	143829	222592	88903.9	204499	144751	126248	250.019	250.019	250.019	250.019	250.019	250.019	250.019	250.019	252851	186720	0.00121924	44157.1	93867.4	29683.5	212.576	184171	67338.4	21294.3	36.5629	4.17082	2.06033	0.0218724	Up
P27169	PON1	Serum paraoxonase/arylesterase 1	5444	3.65816e+06	3.41307e+06	3.86096e+06	3.13222e+06	2.49714e+06	4.14004e+06	1.79596e+06	3.32291e+06	2.10095e+06	2.72521e+06	3.96502e+06	5142747	7.5743e+06	6.49656e+06	7059583	5.57655e+06	8286921	2.35207e+06	2.99753e+06	2.43426e+06	0.00931306	5.18855e+06	2.17525e+06	687874	41.924	3.06466e+06	768192	242924	25.0661	0.590658	-0.759605	0.0773291	Down
P30043	BLVRB	Flavin reductase (NADPH)	645	714676	136101	259282	371130	283759	72446.1	274033	153934	216910	438562	78880.9	250.019	42430.5	40898.2	93562.1	72758.7	50262.1	95244	43435.6	164607	0.00150707	68232.9	44429.1	14049.7	65.1139	292083	184109	58220.5	63.0332	4.28068	2.09784	0.0251996	Up
P48740	MASP1	Mannan-binding lectin serine protease 1	5648	215828	125481	213400	122162	127773	165138	204695	66290.2	154042	93525.3	83573.5	403474	333639	310031	283783	261974	263611	243129	126099	112115	0.0202113	242143	103877	32848.9	42.8992	148833	51254.5	16208.1	34.4375	0.614651	-0.70216	0.118628	Down
P81605	DCD	Dermcidin	117159	250.019	250.019	51960.7	250.019	174425	250.019	250.019	250.019	250.019	250.019	250.019	250.019	106722	93441.2	84756.2	98040.3	119108	187829	43846.8	78848.5	0.0311711	81309.3	56185	17767.3	69.1004	22838.6	55686.1	17609.5	243.825	0.280886	-1.83195	0.145532	Down
Q13103	SPP2	Secreted phosphoprotein 24	6694	187586	189870	335244	378994	338689	308806	300558	226474	201825	224363	33366.2	183565	95033.8	45382.9	215806	170214	419594	188436	221623	158243	0.0313607	173126	109262	34551.6	63.1109	269241	70810	22392.1	26.2999	1.55517	0.637072	0.145944	Up
Q4F786	HBD	Hemoglobin delta Etolia variant (Fragment)	3045	1517309	1.55777e+06	1.99205e+06	1.7659e+06	3.58181e+06	250.019	2369439	2817251	1995905	1405355	74880.8	46865.3	1880.72	67738.8	6870.43	250.019	250.019	616565	250.019	1.02485e+06	4.08007e-05	184040	350269	110765	190.323	1.9003e+06	945349	298946	49.7473	10.3255	3.36814	0.00355584	Up
Q4TZM4	HBB	Hemoglobin beta chain (Fragment)	3043	24777858	15072136	29182114	40305644	19684308	9279006	39346032	21332312	15884624	23714928	464205	416742	150856	7391.64	1.75191e+06	14672.1	15262.5	485984	5.64011e+06	15910850	1.13737e-05	2.4858e+06	5.02098e+06	1.58777e+06	201.986	2.38579e+07	1.00925e+07	3.19153e+06	42.3026	9.59768	3.26269	0.00155765	Up
Q56G89		Serum albumin		85233.6	139443	46231.6	39078.6	69379	124634	46771.3	54214.6	16010.8	56908.9	3354.37	4740.97	5587.42	8405.63	250.019	1541.08	8778.16	1275.25	25925	26195.3	0.00017524	8605.32	9629.27	3045.04	111.899	67790.6	38567.3	12196.1	56.8919	7.87775	2.97778	0.00883958	Up
Q59HB3	APOB	Apolipoprotein B variant (Fragment)	338	250.019	250.019	250.019	250.019	250.019	250.019	250.019	250.019	250.019	250.019	126798	250.019	293162	132259	99093.3	250.019	121908	57540.5	250.019	250.019	0.0115601	83176	93287.9	29500.2	112.157	250.019	0	0	0	0.00300591	-8.37798	0.0879947	Down
Q5TEC6	H3-7	Histone H3-7		33457554	76344120	67007908	98077120	99701488	162409168	40887896	134681024	50137408	44084800	250.019	250.019	250.019	250.019	250.019	250.019	250.019	250.019	55760000	82292296	0.000749783	1.38054e+07	2.97682e+07	9.41352e+06	215.627	8.06788e+07	4.28841e+07	1.35611e+07	53.1541	5.84399	2.54695	0.0167161	Up
Q65ZC9	scFv	Single-chain Fv (Fragment)		2.71989e+06	5.22823e+06	1.76979e+06	5.57888e+06	1.70384e+06	1.06006e+06	2.57546e+06	2.72725e+06	4.50215e+06	2.56642e+06	1.18564e+06	21819.5	25331.8	21507.3	360934	19140.5	366182	414294	2273253	2.91414e+06	0.0010816	760224	1.03945e+06	328704	136.73	3.0432e+06	1.53953e+06	486842	50.5892	4.00302	2.00109	0.0202792	Up
Q68CN4	DKFZp686E23209	Uncharacterized protein		12154.8	8565039	2.61341e+06	7480673	13641082	14274465	7361746	12559269	8350196	9646174	250.019	250.019	250.019	250.019	250.019	250.019	250.019	4552419	13926159	8444832	0.0137185	2.69252e+06	4.87033e+06	1.54013e+06	180.884	8.45042e+06	4.55337e+06	1.4399e+06	53.8834	3.13848	1.65007	0.0977952	Up
Q68DL7	C18orf63	Uncharacterized protein C18orf63	644041	147670	338861	211972	340788	504068	559802	272149	671350	454149	252531	18692.9	115679	473310	346005	68831	191420	14714.4	17549.4	181895	62903.2	0.00558312	149100	154240	48775.1	103.448	375334	167069	52831.8	44.512	2.51733	1.3319	0.0542468	Up
Q6MZU6	DKFZp686C15213	Uncharacterized protein DKFZp686C15213		9591423	29766452	4.90219e+06	7868862	23645802	8391100	9887092	16149642	19008530	22985824	574882	82676.2	1.62389e+06	525146	650479	1.90076e+06	407057	27534.9	4.59192e+06	8558902	0.000140884	1.89433e+06	2.70613e+06	855755	142.855	1.52197e+07	8.3358e+06	2.63601e+06	54.7698	8.03436	3.00618	0.00764493	Up
Q6N093	DKFZp686I04196	Uncharacterized protein DKFZp686I04196 (Fragment)		522725	250.019	323209	745220	560396	358659	321152	411039	254601	544210	652009	460919	591720	657921	1.00144e+06	694382	1.05782e+06	801650	441375	808219	0.0030776	716746	204945	64809.4	28.5938	404146	204253	64590.6	50.5395	0.563862	-0.826586	0.0381516	Down
Q6N095	DKFZp686K03196	Uncharacterized protein		11225983	7350841	11279698	6636828	9523027	8.06209e+06	8942809	15468923	14819970	9724408	4.2191e+06	2.82861e+06	3.2841e+06	3159921	3.41672e+06	2.63464e+06	4946288	7.31622e+06	8.07894e+06	9043584	0.000272744	4.89281e+06	2.37674e+06	751590	48.5761	1.03035e+07	2.96023e+06	936107	28.7304	2.10584	1.07439	0.0103212	Up
Q6NS95	IGL	IGL@ protein	3535	250.019	250.019	250.019	250.019	250.019	250.019	250.019	250.019	250.019	250.019	250.019	58664.5	189925	250.019	250.019	193989	157534	105368	250.019	250.019	0.0159731	70673.2	83744.3	26482.3	118.495	250.019	0	0	0	0.00353768	-8.14298	0.105366	Down
Q6P2J1		Uncharacterized protein		18759828	16920116	26068284	23650914	17929792	26655096	18786368	37454912	21765994	21460050	15009038	19857560	16637457	14606946	13832668	12260422	8069455	17374234	15423362	17965116	0.00214925	1.51036e+07	3.29702e+06	1.04261e+06	21.8293	2.29451e+07	6.09565e+06	1.92761e+06	26.5662	1.51918	0.603293	0.0313768	Up
Q6VFQ6	HBB	Hemoglobin beta chain (Fragment)	3043	1.74723e+06	385855	424886	427777	235161	250.019	679763	346435	137435	212689	250.019	250.019	250.019	250.019	58903.2	250.019	250.019	26253.1	250.019	421182	0.0199651	50808.9	131546	41598.4	258.903	459748	489110	154670	106.387	9.04858	3.17769	0.118148	Up
Q7M4S4		Granulocyte inhibitory protein		3053212	500180	62096.4	473381	1.03099e+06	375030	484691	869283	747029	921373	262633	250.019	344528	250.019	68437.6	34140.9	23344.1	250.019	525272	555875	0.0234655	181498	223498	70676.3	123.141	851726	826438	261343	97.0309	4.69276	2.23044	0.12544	Up
Q7Z374	DKFZp686C02218	Uncharacterized protein DKFZp686C02218 (Fragment)		250.019	8691.25	250.019	250.019	250.019	250.019	250.019	250.019	250.019	250.019	250.019	3.32055e+06	4.22891e+06	3011552	3.85572e+06	5502437	17821.2	5.24354e+06	250.019	250.019	0.00270033	2.51813e+06	2.29027e+06	724246	90.9512	1094.14	2669.35	844.123	243.967	0.000434506	-11.1683	0.0352145	Down
Q7Z3Y4		Uncharacterized protein		250.019	250.019	250.019	250.019	250.019	250.019	309155	250.019	250.019	250.019	406703	205641	323419	253540	192319	248357	200706	514663	250.019	250.019	0.00296346	234585	159898	50564.2	68.1622	31140.6	97684.5	30890.5	313.689	0.132748	-2.91324	0.0370617	Down
Q86TT1		Full-length cDNA clone CS0DD006YL02 of Neuroblastoma of Homo sapiens (human)		5799993	3.04616e+06	1.60505e+06	2.99333e+06	2.35179e+06	2.36383e+06	1.15181e+06	650224	1.30955e+06	2049064	3.18797e+06	10403719	10254680	9060702	11265279	15459280	4.88401e+06	1.86703e+06	859323	436507	0.0178495	6.76785e+06	5.18311e+06	1.63904e+06	76.5843	2.33208e+06	1.44725e+06	457662	62.0585	0.344582	-1.53708	0.111115	Down
Q86TT2		Full-length cDNA clone CS0DI019YF20 of Placenta of Homo sapiens (human) (Fragment)		3.67928e+06	4.00702e+06	2.86904e+06	4.16523e+06	3.70171e+06	5.63706e+06	3.20636e+06	5.51746e+06	3.7363e+06	3346211	2901798	3708870	2.4014e+06	2.1399e+06	2.16476e+06	1.77952e+06	457227	620908	5022793	3.96709e+06	0.0139272	2.51643e+06	1.43804e+06	454749	57.1463	3.98657e+06	919295	290707	23.0598	1.58422	0.663771	0.0984144	Up
Q8N1N4	KRT78	Keratin, type II cytoskeletal 78	196374	77670.5	263877	250.019	250.019	586457	322859	250.019	289180	387363	353250	3512.94	250.019	250.019	6300.29	250.019	250.019	250.019	250.019	250.019	250.019	0.00214342	1181.34	2070.4	654.717	175.259	228141	200503	63404.6	87.8857	193.12	7.59336	0.0313768	Up
Q8TD55	PLEKHO2	Pleckstrin homology domain-containing family O member 2	80301	250.019	250.019	30097.4	6798.84	250.019	250.019	11757.4	250.019	44632.9	13009.2	221996	61319.2	18226.7	250.019	348558	211847	32169.8	8981.82	36507.1	14690.6	0.0411001	95454.6	120782	38194.7	126.533	10754.6	15258.3	4825.1	141.878	0.112667	-3.14987	0.171062	Down
Q9BWP8	COLEC11	Collectin-11	78989	250.019	8398.29	8316.91	4449.47	9584.44	8178.39	9042.99	7902.01	250.019	23068.2	71480.1	56383.7	101789	105012	108944	40687.4	23977.2	37775.1	250.019	250.019	0.00235429	54654.9	41273.9	13051.9	75.5173	7944.08	6356.53	2010.11	80.016	0.14535	-2.7824	0.0327099	Down
Q9UK54	HBB	Hemoglobin beta subunit variant (Fragment)	3043	977745	104534	268330	193483	250.019	250.019	207955	250.019	163554	192685	446930	2.06212e+06	590309	1.05495e+06	907308	823934	457681	1.03407e+06	250.019	250.019	0.0221974	737779	601027	190062	81.4644	210904	286486	90594.9	135.837	0.285863	-1.80661	0.122533	Down
Q9UNN8	PROCR	Endothelial protein C receptor	10544	250.019	250.019	250.019	250.019	250.019	250.019	250.019	250.019	250.019	250.019	17120.4	250.019	22482.6	250.019	14036.2	250.019	23872.7	55573.3	250.019	250.019	0.030821	13433.5	17793.9	5626.92	132.459	250.019	0	0	0	0.0186116	-5.74765	0.144647	Down
S6B294		IgG L chain		2748902	196688	1731447	5474827	2458097	2.29346e+06	2288615	3.45586e+06	596055	3.69342e+06	1857904	250.019	404605	250.019	250.019	3.18885e+06	284053	250.019	2136855	3.07972e+06	0.0421349	1.0953e+06	1.32995e+06	420568	121.424	2.49374e+06	1.52239e+06	481423	61.0486	2.27677	1.18699	0.172867	Up
S6BAQ4		IgG H chain		111342	493387	30989.9	163177	113406	101782	75388.2	123951	135841	230090	26098.3	15682.3	250.019	250.019	250.019	250.019	71764.4	250.019	71975.3	302756	0.0442931	48952.6	93663.3	29618.9	191.335	157935	128945	40775.9	81.644	3.22629	1.68988	0.178413	Up
S6BGD6		IgG L chain		5251949	5.72311e+06	5992131	6721443	6417085	4.63777e+06	5771639	2971543	3.09518e+06	4.94443e+06	4990607	752349	1.94923e+06	1.93573e+06	1.72189e+06	3.50749e+06	2.38319e+06	2.05999e+06	2.71003e+06	3.31859e+06	0.000154454	2.53291e+06	1.17428e+06	371338	46.3607	5.15263e+06	1.28158e+06	405270	24.8723	2.03427	1.02451	0.00822609	Up
S6C4R7		IgG L chain		41914304	38047588	35204136	37339160	38535808	37647824	25225250	41958560	43261916	36344396	26456634	22056746	12718196	11720203	26099932	20013614	20102568	17495700	24932844	27068040	1.51127e-06	2.08664e+07	5.5555e+06	1.7568e+06	26.6241	3.75479e+07	5.06884e+06	1.60291e+06	13.4997	1.79944	0.847547	0.0007244	Up

## Sheet: DR.vs.DB
Accession	Gene Symbol	Protein name	ENTREZID	DR-1	DR-2	DR-3	DR-4	DR-5	DR-6	DR-7	DR-8	DR-9	DR-10	DB-1	DB-2	DB-3	DB-4	DB-5	DB-6	DB-7	DB-8	DB-9	DB-10	DB-11	ttestPvalue	ControlMean	ControlSD	ControlSE	ControlCV	TestMean	TestSD	TestSE	TestCV	FC	Log2FC	fdr	threshold
P35749	MYH11	Myosin-11	4629	250.019	250.019	250.019	250.019	250.019	250.019	250.019	250.019	1.20885e+06	2595668	250.019	250.019	250.019	1.55107e+06	1.67015e+06	2.3439e+06	1.53498e+06	1.49406e+06	3.73185e+06	2.42168e+06	1.17336e+06	0.0284758	1.44744e+06	1.15757e+06	349020	79.9738	380652	866016	273858	227.509	0.262983	-1.92696	0.283378	Down
A0A024R462	FN1	Fibronectin	2335	7749842	4.94694e+06	18223582	4.05351e+06	14577515	15519857	14764449	9689196	2.0958e+06	1.03991e+06	6.86531e+06	12273892	3459603	2.50927e+06	2.55689e+06	2.20628e+06	1.50173e+06	1.39294e+06	2.65035e+06	2.42195e+06	1.94128e+06	0.0155296	3.61632e+06	3.23188e+06	974449	89.3694	9.26606e+06	6.19298e+06	1.95839e+06	66.8351	2.56229	1.35744	0.244207	Up
Q92954	PRG4	Proteoglycan 4	10216	326106	294072	308505	135922	270035	205982	256229	236137	439655	554767	209664	129458	447303	815097	1412700	786282	418341	397642	842027	542952	1.01058e+06	0.0148912	637459	377817	113916	59.2693	302741	119153	37679.5	39.358	0.474918	-1.07425	0.244207	Down
O43790	KRT86	Keratin, type II cuticular Hb6	3892	589501	250.019	108930	28863	1.07631e+06	168227	616797	112865	2123021	2.68429e+06	4192.25	441375	630866	2587182	2.24914e+06	2.87574e+06	2835250	2.09788e+06	2.29476e+06	2.4811e+06	2509686	0.0149584	1.90974e+06	1.03231e+06	311253	54.0548	750905	943644	298407	125.668	0.393197	-1.34668	0.244207	Down
P22352	GPX3	Glutathione peroxidase 3	2878	458264	744803	633736	1.48503e+06	706991	661317	784690	457474	359125	260582	835938	263273	410617	307776	336653	564367	327064	302198	152725	323315	299369	0.0274599	374845	182609	55058.6	48.7158	655201	339585	107386	51.8291	1.74793	0.805644	0.279063	Up
A0A0F7TD49	IGHV3-7	IGHV3-7 protein (Fragment)	28452	235630	197845	158168	282209	221935	411517	286289	104642	375597	572331	489308	297836	242800	272796	467095	509244	664146	212025	647223	682803	580265	0.0206983	460504	177250	53442.8	38.4904	284616	137197	43385.5	48.2042	0.618054	-0.694194	0.25952	Down
A0A0R7FJH5	F12	Coagulation factor XII	2161	1.46259e+06	802738	1.00482e+06	1492022	2161705	905122	1.60606e+06	2.2942e+06	819183	604738	1.52533e+06	905587	913380	734197	932440	617801	679501	659347	611249	681482	1.38439e+06	0.0427057	876791	310772	93701.4	35.4443	1.31532e+06	585995	185308	44.5516	1.50015	0.585106	0.31655	Up
Q15582	TGFBI	Transforming growth factor-beta-induced protein ig-h3	7045	376482	342948	621476	201229	387363	183819	353311	161972	104551	127626	191666	196249	125684	97570.4	133807	175489	184751	209148	182331	128622	193261	0.0245749	165325	36909.9	11128.8	22.3257	286078	159790	50530.1	55.8555	1.73039	0.7911	0.266243	Up
A0A109PPC2		GCT-A7 light chain variable region (Fragment)		208921	127158	9033.1	59425.5	592826	11391.4	15627.8	484170	115678	410359	433053	166779	300759	783515	102573	692900	123312	1.04638e+06	692266	1.02701e+06	2.72497e+06	0.042169	735774	743296	224112	101.022	203459	215378	68108.4	105.858	0.276524	-1.85452	0.314679	Down
A0A109PS54		GCT-A8 light chain variable region (Fragment)		81536.5	68685.4	31635.1	51533.3	22008	59805.5	201947	23147.3	250.019	250.019	250.019	44631.3	12593	8963.8	250.019	250.019	250.019	250.019	250.019	250.019	250.019	0.0164613	6198.93	13448.8	4054.95	216.953	54079.8	58836.5	18605.7	108.796	8.72406	3.125	0.244207	Up
P22105	TNXB	Tenascin-X	7148	115353	141822	111537	45090.7	67443	35757.2	110138	72575.6	250.019	145659	5939.09	250.019	15269.1	10623.6	250.019	27291.6	250.019	250.019	250.019	47512.8	250.019	9.93767e-05	9830.57	15234.5	4593.38	154.971	84562.5	48104.7	15212	56.8865	8.602	3.10467	0.0357259	Up
Q16610	ECM1	Extracellular matrix protein 1	1893	1.01145e+06	832517	1.28058e+06	754412	1.60451e+06	1.11474e+06	1.92127e+06	1.41714e+06	287233	383321	1.17347e+06	1.03287e+06	723255	338765	328350	428483	345750	348997	289646	629770	366282	0.0114929	545967	308262	92944.6	56.4617	1.06072e+06	518549	163980	48.8865	1.94283	0.958156	0.221837	Up
P02679	FGG	Fibrinogen gamma chain	2266	57752120	73475888	101820704	63259896	59999900	77159568	59108488	60945908	34191984	29372940	59908488	64466404	48101604	36981688	32514956	37052920	32147654	36996492	37235616	29654608	27914256	0.00835566	40270426	1.21038e+07	3.64943e+06	30.0563	6.17087e+07	2.05947e+07	6.51261e+06	33.374	1.53236	0.615754	0.219503	Up
P12955	PEPD	Xaa-Pro dipeptidase	5184	17745	15034	17433.6	33508.4	22568.6	17652.3	34054.7	16092	250.019	6453.27	17044	2341.92	7538.7	4997.49	250.019	250.019	16037.7	250.019	250.019	250.019	14825.9	0.00474227	5821.44	6945.05	2094.01	119.301	18079.2	10437.2	3300.52	57.7302	3.10562	1.63488	0.174118	Up
P25311	AZGP1	Zinc-alpha-2-glycoprotein	563	2812405	3.19768e+06	3.46455e+06	3713572	2.29932e+06	3.34187e+06	3.19699e+06	2528949	1.49231e+06	1.40563e+06	3690159	2220544	1903694	1.37271e+06	1.59461e+06	1.36489e+06	1.1762e+06	1.32538e+06	1.53232e+06	1.313e+06	1282997	0.00578208	1.70696e+06	725925	218875	42.5275	2.74533e+06	805147	254610	29.3279	1.60832	0.685553	0.186513	Up
P02788	LTF	Lactotransferrin	4057	1.36614e+06	1407418	250.019	749907	387938	250.019	445341	477063	547831	437017	407678	250.019	250.019	250.019	127551	351908	437723	17268.9	486516	250.019	453169	0.0306299	207529	215991	65123.7	104.078	581915	481985	152417	82.8273	2.80403	1.4875	0.286011	Up
Q13510	ASAH1	Acid ceramidase	427	101678	250.019	250.019	250.019	160984	250.019	230506	93807.9	8023.57	250.019	250.019	250.019	250.019	12171.8	46281.6	250.019	250.019	250.019	250.019	250.019	250.019	0.0471333	5518.5	13984.7	4216.53	253.414	59624.9	83466.9	26394.5	139.986	10.8045	3.43357	0.324295	Up
A0A1C9J6R5		B cell receptor heavy chain variable region (Fragment)		197270	315387	439618	603954	335735	342147	370677	101874	264752	46631	1.1243e+06	322052	669881	93409	365201	867299	65502.7	649203	540246	778864	873676	0.0298004	577240	336618	101494	58.3151	301805	161720	51140.3	53.5843	0.522841	-0.935556	0.283795	Down
A0A1L7B5J3	SERPINA1	Alpha-1-antitrypsin short transcript variant 1C4	5265	335900	24173.2	260604	222200	345948	172037	406881	228924	250.019	250.019	96082.8	132802	80763.7	250.019	250.019	65402.1	250.019	250.019	250.019	250.019	250.019	0.00245578	34254.6	49761.2	15003.6	145.269	199717	148723	47030.5	74.4672	5.83036	2.54358	0.157625	Up
P05093	CYP17A1	Steroid 17-alpha-hydroxylase/17,20 lyase	1586	250.019	250.019	250.019	250.019	250.019	250.019	250.019	250.019	250.019	367809	250.019	250.019	250.019	250.019	215420	523493	597097	462460	292411	546898	250.019	0.0318882	239912	253439	76414.7	105.638	37006	116233	36755.9	314.091	0.154248	-2.69667	0.287754	Down
P16070	CD44	CD44 antigen	960	871020	493566	462008	449430	850090	522286	1.13222e+06	1.83773e+06	60140.6	111178	459307	469491	411471	250.019	164404	189627	27491.4	12660.9	250.019	328946	68252.7	0.00979037	193832	190835	57539	98.4541	678967	524760	165944	77.288	3.50287	1.80854	0.219503	Up
A0A2U8J8Y2	IgH	Ig heavy chain variable region (Fragment)		276805	47812.4	157881	997514	213348	936953	250.019	442458	250.019	4725.7	7696.2	46804.1	40180.2	250.019	250.019	250.019	250.019	45797.7	6765.93	250.019	24814	0.0183242	15755.3	19730.8	5949.05	125.233	307800	375744	118821	122.074	19.5363	4.28808	0.254421	Up
A0A2U8J921	IgH	Ig heavy chain variable region (Fragment)		43467.4	22109.9	317118	274716	76569	76348.2	41037.2	214958	165163	22721.9	250.019	250.019	102750	90826.8	82389.1	33422.3	58717	250.019	48860.4	70009	56950.7	0.0432256	49515.9	37042.9	11168.9	74.8102	125421	109790	34718.7	87.5374	2.53294	1.34081	0.317618	Up
P36980	CFHR2	Complement factor H-related protein 2	3080	852790	1.51189e+06	1.59949e+06	1.44928e+06	762545	1.37938e+06	707547	708541	678042	690817	792999	1.04596e+06	365183	621429	591764	578883	563546	612927	925716	682616	676791	0.0146309	677983	185918	56056.4	27.4222	1.03403e+06	394884	124873	38.1888	1.52516	0.60896	0.244207	Up
A0A5C2FTA7		IGL c211_light_IGLV7-46_IGLJ3 (Fragment)		321213	250.019	133889	48893.7	888998	726937	910064	1.0382e+06	252671	105603	37943.4	313212	19505.4	250.019	39776.5	250.019	353139	310246	250.019	250.019	250.019	0.0156651	97733.8	147442	44455.6	150.861	442671	403283	127529	91.102	4.52936	2.17931	0.244207	Up
A0A5C2FTS0		IGL c381_light_IGLV2-8_IGLJ2 (Fragment)		250.019	350753	250.019	1.5204e+06	250.019	1.60332e+06	552313	250.019	1.92732e+06	1.36127e+06	250.019	250.019	250.019	652593	521367	250.019	250.019	250.019	250.019	250.019	250.019	0.0206673	106928	239151	72106.8	223.656	731637	783511	247768	107.09	6.84232	2.77448	0.25952	Up
A0A5C2FU63		IGL c282_light_IGLV1-47_IGLJ2 (Fragment)		1194368	656899	250.019	809602	1.35975e+06	250.019	996893	806646	250.019	175950	250.019	250.019	250.019	250.019	250.019	250.019	250.019	250.019	250.019	250.019	250.019	0.00112094	250.019	0	0	0	600086	520343	164547	86.7114	2400.16	11.2289	0.123423	Up
A0A5C2FUE7		IGL c618_light_IGKV3-20_IGKJ1 (Fragment)		2111552	1.14674e+06	1.04546e+06	1.68487e+06	2.55295e+06	2.38446e+06	1.94954e+06	2340202	3.79715e+06	5283402	2.67495e+06	4557849	2.68806e+06	3559387	5564615	3259068	5.73822e+06	3.0156e+06	6.50497e+06	5.21417e+06	6.08768e+06	0.00318678	4.44223e+06	1.44658e+06	436160	32.5642	2.42963e+06	1.26875e+06	401213	52.2197	0.546939	-0.870547	0.167333	Down
A0A5C2FUI2		IGL c244_light_IGLV1-44_IGLJ3 (Fragment)		1.33381e+06	658320	794359	921242	1368413	2.01693e+06	1.25798e+06	1.41963e+06	2.62761e+06	2.42666e+06	710411	1.28425e+06	1157994	3.96742e+06	2.16564e+06	2.27786e+06	2.37418e+06	2.68793e+06	2.43177e+06	2761368	4.75321e+06	0.0406784	2.41564e+06	1.17978e+06	355718	48.8394	1.4825e+06	670460	212018	45.2251	0.613708	-0.704376	0.314661	Down
A0A5C2FUJ1		IGL c668_light_IGKV3-20_IGKJ1 (Fragment)		935262	805134	935018	595161	889313	681449	353150	479883	2.01909e+06	2806410	472605	1.13789e+06	747326	1.87716e+06	2.1583e+06	1.82143e+06	2.73125e+06	3.04508e+06	2.44301e+06	2.02534e+06	2775324	0.0219027	1.93043e+06	841968	253863	43.6156	1.04999e+06	766639	242433	73.0142	0.543914	-0.87855	0.25952	Down
A0A5C2FUP9		IGL c599_light_IGKV2D-28_IGKJ4 (Fragment)		33157.8	4717.24	1691.71	250.019	4659.45	976.873	250.019	250.019	250.019	250.019	250.019	17662.7	22014.7	30072.9	33422.9	64847.6	94450.3	22585.6	250.019	15541.2	48255.3	0.00972762	31759.4	28158.9	8490.24	88.6634	4645.32	10174.8	3217.56	219.034	0.146266	-2.77333	0.219503	Down
A0A5C2FVE4		IGL c40_light_IGKV3-20_IGKJ2 (Fragment)		22674.7	22625.2	232326	702054	51569.8	16788.8	33009.9	376057	731235	208007	96025.9	2.54122e+06	96059.2	712596	900622	1.38496e+06	645660	2.40256e+06	684677	1.38716e+06	1.15906e+06	0.00511306	1.09187e+06	807764	243550	73.9796	239635	278299	88005.9	116.135	0.219471	-2.1879	0.179331	Down
A0A5C2FVG1		IGL c889_light_IGKV2D-28_IGKJ2 (Fragment)		52700.1	73169.7	173880	119130	67499	78548.2	382646	374045	370195	390426	801104	2.13445e+06	313170	1.17178e+06	567808	1.22331e+06	678503	250.019	131467	531239	543303	0.0140348	736035	598623	180492	81.3308	208224	151113	47786	72.5722	0.282899	-1.82164	0.241774	Down
A0A5C2FVI5		IGL c1068_light_IGKV3-20_IGKJ1 (Fragment)		250.019	2299.31	250.019	250.019	780.529	250.019	250.019	250.019	250.019	250.019	83874.6	9343.96	5159.96	250.019	42473.6	34085.6	29374.3	78204.8	250.019	250.019	250.019	0.0196642	25774.3	31283.2	9432.23	121.374	507.999	651.109	205.899	128.171	0.0197095	-5.66496	0.25952	Down
A0A5C2FVR9		IGL c1101_light_IGKV1D-17_IGKJ1 (Fragment)		145440	37850.2	7338.54	149840	60808.1	191785	86143.3	22059.2	287753	326325	232983	383385	1.94425e+06	1.25846e+06	429514	483960	1086636	602577	524158	536642	717081	0.00121939	745422	499238	150526	66.9739	131534	110431	34921.3	83.9561	0.176456	-2.50262	0.125249	Down
A0A5C2FVT3		IGL c744_light_IGKV1-12_IGKJ2 (Fragment)		897688	624380	347829	250.019	147946	250.019	157401	64796.6	1.28027e+06	220582	1.16752e+06	331145	494647	1913115	3332023	2.44494e+06	3.59001e+06	1.77973e+06	370206	1.17038e+06	2.05188e+06	0.00246632	1.69505e+06	1.12361e+06	338780	66.2873	374139	428886	135626	114.633	0.220724	-2.17968	0.157625	Down
A0A5C2FVT6		IGL c1039_light_IGKV1-6_IGKJ2 (Fragment)		15831.2	447288	718338	1.01237e+06	11662.4	203805	1.09343e+06	155897	1.38874e+06	1.16885e+06	201281	1074830	250.019	1.53963e+06	1.93441e+06	749451	1.32617e+06	1.39329e+06	1.00099e+06	1983108	2587631	0.0417756	1.25373e+06	768773	231794	61.3187	621621	519985	164434	83.6498	0.495816	-1.01212	0.314661	Down
A0A5C2FVY3		IGL c1171_light_IGKV3-11_IGKJ4 (Fragment)		377178	20573.3	250.019	64238.1	65813.4	65142.3	330432	199273	682134	71775.9	295040	422757	385996	762539	41735.3	450782	1.03423e+06	193206	851334	1.54854e+06	828246	0.0107119	619491	435362	131267	70.2774	187681	216667	68516	115.444	0.30296	-1.7228	0.219503	Down
A0A5C2FW01		IGL c1191_light_IGKV1-5_IGKJ5 (Fragment)		3.07744e+06	5322985	1.54964e+06	4421482	2.38927e+06	6079228	2556365	3.3907e+06	8363536	7343531	5.32883e+06	10628067	8405388	8463657	7.20418e+06	9886294	8788807	8271216	8.10484e+06	9450773	9028927	8.31694e-05	8.50554e+06	1.40255e+06	422885	16.4899	4.44942e+06	2.26951e+06	717683	51.007	0.52312	-0.934787	0.0357259	Down
A0A5C2FW50		IGL c416_light_IGKV1D-39_IGKJ2 (Fragment)		155040	54575.5	122047	73772.3	203332	266647	307124	142507	187303	329421	306516	319727	210829	251239	138554	462826	428506	657947	772342	216541	253745	0.0164729	365343	198298	59789.2	54.2773	184177	93583.6	29593.7	50.8118	0.50412	-0.988161	0.244207	Down
A0A5C2FW68		IGL c894_light_IGLV2-14_IGLJ1 (Fragment)		250.019	250.019	250.019	336068	250.019	250.019	250.019	28649.2	514541	250.019	250.019	359428	250.019	1.14859e+06	863850	250.019	780278	250.019	1.06247e+06	250.019	2.16147e+06	0.0447083	579759	700502	211209	120.826	88100.9	182847	57821.4	207.543	0.151961	-2.71822	0.317875	Down
A0A5C2FWM5		IGL c1498_light_IGKV1D-39_IGKJ1 (Fragment)		429415	1.59648e+06	3.44121e+06	8.21527e+06	476182	8812290	3.64394e+06	1258501	7000562	7639712	3.36783e+06	14237666	10138511	18206596	17415618	20810744	8785756	18056620	7.39049e+06	9572222	19426254	0.000334618	1.34008e+07	5.79817e+06	1.74822e+06	43.2675	4.25136e+06	3.35731e+06	1.06167e+06	78.9703	0.317248	-1.65632	0.0874389	Down
A0A5C2FWQ1		IGL c1379_light_IGKV1-39_IGKJ4 (Fragment)		769.345	250.019	559.914	250.019	3087.26	568.993	250.019	1104.82	78442.2	4439.16	32102.4	1616.43	43985.3	250.019	43534	53734.5	172036	277304	82442.4	58710.4	105624	0.0171621	79212.7	81623.2	24610.3	103.043	8972.17	24449.6	7731.65	272.505	0.113267	-3.1422	0.245283	Down
A0A5C2FWQ8		IGL c1389_light_IGLV3-21_IGLJ3 (Fragment)		1.91807e+06	361116	720003	659070	1.30246e+06	394251	1256897	2.35375e+06	605304	1.10202e+06	908998	950003	184061	382939	365399	331974	570954	1082163	393708	445832	174265	0.0249045	526391	314050	94689.7	59.6611	1.06729e+06	660270	208796	61.8639	2.02757	1.01975	0.266243	Up
A0A5C2FWW2		IGL c1521_light_IGKV1-39_IGKJ1 (Fragment)		74067.8	6729.43	29295.8	134222	32738.3	161785	44993.5	52896.5	109030	166567	53869.5	37019.8	250.019	317036	481971	370141	168028	291022	68345.9	155363	359012	0.0291438	209278	162154	48891.4	77.4827	81232.6	57849.1	18293.5	71.2142	0.388156	-1.36529	0.283795	Down
A0A5C2FWX2		IGL c620_light_IGLV1-44_IGLJ3 (Fragment)		618522	508661	236972	167668	1.24158e+06	478361	531963	975768	927880	1.24742e+06	612572	1.58956e+06	1.29865e+06	3.26737e+06	1.52891e+06	930668	1.33646e+06	1.21471e+06	3357303	1.06467e+06	1.12705e+06	0.00997713	1.57527e+06	900482	271506	57.1638	693480	385705	121971	55.6188	0.44023	-1.18367	0.219503	Down
A0A5C2FWX3		IGL c1531_light_IGKV4-1_IGKJ4 (Fragment)		250.019	250.019	250.019	250.019	250.019	250.019	250.019	250.019	300926	460499	250.019	230089	130700	261474	387368	236276	619141	405343	250.019	373972	361763	0.0187868	273329	184618	55664.4	67.5441	76342.5	164767	52104	215.826	0.279306	-1.84008	0.254862	Down
A0A5C2FX07		IGL c736_light_IGKV3-20_IGKJ1 (Fragment)		250.019	250.019	250.019	250.019	250.019	250.019	119691	975231	1.06248e+06	250.019	250.019	53349.6	250.019	485190	1.87087e+06	1.87503e+06	1.10662e+06	1.2339e+06	733581	1930108	519200	0.0228946	891668	760822	229397	85.3257	215915	425320	134498	196.985	0.242148	-2.04604	0.265592	Down
A0A5C2FX11		IGL c1214_light_IGKV3-20_IGKJ1 (Fragment)		5.95764e+06	3.04112e+06	2944703	5.45409e+06	6889499	6162629	5.17773e+06	6757788	9837812	13700724	7.05327e+06	10530207	5.17894e+06	9291389	20089228	8485167	15034151	8245818	15971143	14134531	16000323	0.00788851	1.18195e+07	4.66427e+06	1.40633e+06	39.4626	6592374	3.17942e+06	1.00542e+06	48.2288	0.557755	-0.842295	0.212031	Down
A0A5C2FX54		IGL c1549_light_IGKV1D-39_IGKJ1 (Fragment)		250.019	151533	250.019	176820	250.019	250.019	250.019	250.019	147615	164586	664035	676465	498814	250.019	89735.7	129877	240183	182052	100051	250.019	125881	0.0408718	246145	249502	75227.6	101.364	64205.3	82921.1	26222	129.15	0.260844	-1.93874	0.314661	Down
A0A5C2FXH8		IGL c900_light_IGKV3-20_IGKJ2 (Fragment)		173800	250.019	250.019	23099.6	51698.2	34818.9	250.019	170365	10060	250.019	250.019	11690.3	250.019	115196	154327	943516	446133	1.38853e+06	1072216	250.019	314133	0.0375464	404227	500544	150920	123.827	46484.2	68429.2	21639.2	147.21	0.114995	-3.12035	0.305902	Down
A0A5C2FXM3		IGL c1669_light_IGKV3-20_IGKJ1 (Fragment)		157902	10994.7	250.019	87845.1	70238	61233.8	250.019	973176	13945	90329	250.019	668116	502974	998555	1.11513e+06	7065.31	1.264e+06	210321	997079	1.89258e+06	8903.03	0.0191685	696815	617818	186279	88.6631	146616	294753	93209.2	201.037	0.210409	-2.24873	0.256412	Down
A0A5C2FXP5		IGL c17_light_IGKV2D-28_IGKJ4 (Fragment)		140018	50993.4	25520.9	45442.1	1336.19	4072.22	21651.6	40532.2	250.019	250.019	15769.4	2248.06	250.019	250.019	250.019	250.019	250.019	250.019	250.019	250.019	250.019	0.0252008	1842.51	4657.75	1404.36	252.794	33006.7	42370.6	13398.8	128.37	17.914	4.16301	0.266277	Up
A0A5C2FXW3		IGL c1722_light_IGKV1-5_IGKJ2 (Fragment)		1.34386e+06	462785	159137	2892320	1.31395e+06	429567	986971	739849	299157	788041	250.019	461087	433624	282212	376288	270087	608850	556388	445538	705176	519268	0.0493064	423524	191675	57792.3	45.2572	941564	795022	251408	84.4363	2.22316	1.15261	0.329491	Up
A0A5C2FXW8		IGL c1868_light_IGKV2-30_IGKJ4 (Fragment)		92551.6	82431.2	39864.9	66588.9	29352.5	75066.3	247940	32867.5	250.019	250.019	6565.36	28191.6	250.019	250.019	250.019	250.019	250.019	250.019	250.019	250.019	250.019	0.00865847	3364.28	8449.43	2547.6	251.151	66716.3	71433.3	22589.2	107.07	19.8308	4.30967	0.219503	Up
A0A5C2FXX2		IGL c1732_light_IGKV3-15_IGKJ1 (Fragment)		59428.4	896622	239562	1.12261e+06	267411	523530	352782	9125.2	1.67514e+06	145655	2.54882e+06	1.9108e+06	1.75712e+06	3.63616e+06	220376	1.05266e+06	1.91699e+06	2.32168e+06	1401844	3.67463e+06	1.41812e+06	0.000797902	1.9872e+06	1.03533e+06	312163	52.0997	529187	539770	170690	102	0.266298	-1.90889	0.122373	Down
A0A5C2FXZ2		IGL c1831_light_IGLV2-14_IGLJ1 (Fragment)		1.66008e+06	465414	66820.9	476788	1.96194e+06	432862	2.01378e+06	5.33509e+06	180791	1.45559e+06	242722	323643	477640	34671.8	369136	165575	404518	250.019	198499	12657.2	188193	0.0219223	219773	162477	48988.7	73.9294	1.40492e+06	1.5696e+06	496352	111.722	6.39257	2.6764	0.25952	Up
A0A5C2FY30		IGL c1554_light_IGKV1-27_IGKJ3 (Fragment)		918199	1.5682e+06	744418	1.09002e+06	613850	115816	694674	250.019	162811	31587.6	2.64416e+06	478867	3.10623e+06	933324	552675	1.69242e+06	1.11301e+06	724758	679471	300720	2.39042e+06	0.0472462	1.32873e+06	975697	294184	73.4307	593983	518201	163870	87.2418	0.44703	-1.16156	0.324296	Down
A0A5C2FY75		IGL c1842_light_IGKV1D-43_IGKJ1 (Fragment)		1812711	6341316	7.55885e+06	4764975	1.31872e+06	14955165	2.36052e+06	1.4333e+06	5334930	7464380	14312882	18362616	12695622	6430570	5868893	6.36266e+06	8649855	8619713	7385275	8.08012e+06	6801374	0.0335022	9.41542e+06	3.9945e+06	1.20439e+06	42.4252	5.33449e+06	4.16297e+06	1.31645e+06	78.0388	0.566569	-0.819676	0.292864	Down
A0A5C2FYI7		IGL c1949_light_IGKV4-1_IGKJ1 (Fragment)		461379	108105	250.019	2.84736e+06	1.27375e+06	370590	250.019	2.24678e+06	3.0758e+06	1.92506e+06	319021	906628	636483	3.56719e+06	3.71991e+06	5773331	4882278	5441180	3.77209e+06	1.91202e+06	1.76013e+06	0.0258974	2.97184e+06	1.96209e+06	591593	66.0228	1.23093e+06	1.20896e+06	382307	98.215	0.414198	-1.27161	0.268884	Down
A0A5C2FYZ9		IGL c1894_light_IGKV3-20_IGKJ1 (Fragment)		23914.8	45735.4	246948	83264.3	32110.2	7054.33	24300.4	7743.08	61124.5	94260.1	276890	759203	465624	110757	279429	158788	179547	248598	13059	24000.7	30354.7	0.0331197	231477	221750	66860.2	95.7978	62645.5	71248.9	22530.9	113.734	0.270633	-1.88559	0.291291	Down
A0A5C2FZ22		IGL c517_light_IGKV1-39_IGKJ2 (Fragment)		250.019	932533	723222	75676.5	434007	104851	33628.7	1.38242e+06	1.94799e+06	2.96251e+06	139550	42228.4	64602.5	6530264	3.10151e+06	3.21555e+06	250.019	4.49454e+06	3.1314e+06	5.21101e+06	6.03443e+06	0.0264906	2.90594e+06	2.51625e+06	758678	86.5899	859708	982632	310736	114.298	0.295845	-1.75709	0.273072	Down
A0A5C2FZH8		IGL c1075_light_IGKV3-20_IGKJ5 (Fragment)		632373	453493	689727	515103	523664	54885.4	568416	527796	48176.4	250.019	396545	229946	512144	250.019	37946.7	250.019	250.019	250.019	150219	250.019	19823.3	0.0100945	122534	182113	54909.3	148.623	401388	261768	82778.3	65.2156	3.27573	1.71182	0.219503	Up
A0A5C2FZM1		IGL c2349_light_IGKV3-15_IGKJ1 (Fragment)		250.019	250.019	250.019	39537	250.019	250.019	250.019	250.019	250.019	250.019	610214	250.019	368787	250.019	608806	1.0452e+06	250.019	557916	250.019	564229	250.019	0.00860628	341491	363085	109474	106.323	4178.72	12423.6	3928.7	297.307	0.0122367	-6.35265	0.219503	Down
A0A5C2FZR7		IGL c1770_light_IGKV1-12_IGKJ3 (Fragment)		250.019	250.019	250.019	4089.05	10719	12590.9	250.019	250.019	11669.5	338104	250.019	250.019	250.019	28138.4	221112	197012	229572	321415	324708	321106	154310	0.0294656	163466	135252	40780	82.7403	37842.2	105631	33403.3	279.134	0.2315	-2.11092	0.283795	Down
A0A5C2FZT1		IGL c1175_light_IGKV3-20_IGKJ1 (Fragment)		317474	531241	250.019	195813	526611	73391.3	339563	343767	250.019	250.019	52205.2	132146	2870.29	250.019	250.019	250.019	15587.2	250.019	10577.8	545.668	40966	0.00412621	23263.4	40344.3	12164.3	173.424	232861	209574	66273.1	89.9996	10.0097	3.32333	0.174118	Up
A0A5C2FZW2		IGL c2439_light_IGKV4-1_IGKJ2 (Fragment)		174436	111463	143959	51216	542534	250.019	844146	250.019	566949	1.29149e+06	250.019	250.019	250.019	1.17388e+06	1.36306e+06	1.37665e+06	2782859	1.89531e+06	669156	890374	1.18135e+06	0.0424815	1.03031e+06	861791	259840	83.644	372669	431235	136368	115.715	0.361706	-1.46711	0.315703	Down
A0A5C2G003		IGL c867_light_IGKV3-20_IGKJ2 (Fragment)		250.019	250.019	30040.8	250.019	250.019	15754.5	250.019	250.019	250.019	63502.9	85529.9	833308	377941	63531.3	57599	55954.8	42617	146179	166991	45798.4	179583	0.0302582	186821	235910	71129.6	126.276	11104.8	20951.1	6625.32	188.666	0.059441	-4.0724	0.284305	Down
A0A5C2G013		IGL c2304_light_IGKV1-39_IGKJ4 (Fragment)		555122	108391	250.019	291309	102288	460318	26348.3	643195	1.09876e+06	1.42087e+06	250.019	110772	289951	1889311	1.66479e+06	2.25603e+06	2.89407e+06	1.44568e+06	1.39051e+06	2.06462e+06	1526860	0.00960536	1.41208e+06	926637	279392	65.6223	470686	477520	151005	101.452	0.333329	-1.58498	0.219503	Down
A0A5C2G080		IGL c1940_light_IGKV3-20_IGKJ5 (Fragment)		277141	47887.4	130816	59672.3	126563	153348	141627	197110	31740.4	38693.6	147849	48888.7	44193.4	388952	250.019	806067	507292	78028	435510	573819	468909	0.036845	318160	267581	80678.6	84.1026	120460	78610.9	24859	65.2591	0.378614	-1.4012	0.303608	Down
A0A5C2G085		IGL c2354_light_IGKV1-5_IGKJ3 (Fragment)		250.019	663060	250.019	250.019	237318	120358	500718	45812	250.019	250.019	312685	849674	564778	707760	1.71828e+06	250.019	1.73088e+06	250.019	399712	250.019	380037	0.045326	605869	620838	187190	102.471	156851	239733	75810.2	152.841	0.258887	-1.94961	0.319451	Down
A0A5C2G099		IGL c977_light_IGKV3-20_IGKJ3 (Fragment)		113377	250.019	250.019	423134	284795	776889	742716	1090979	1.95142e+06	2.4649e+06	549921	602322	615301	1.56626e+06	3.48584e+06	1.78432e+06	3.67658e+06	1.76437e+06	2.33558e+06	1.9258e+06	2.06085e+06	0.01983	1.85156e+06	1.0565e+06	318546	57.0599	784871	839443	265455	106.953	0.423898	-1.23821	0.25952	Down
A0A5C2G0F1		IGL c1886_light_IGKV1-12_IGKJ4 (Fragment)		250.019	250.019	250.019	250.019	12314.7	250.019	250.019	57714.5	250.019	16590.7	52149.8	976.178	250.019	67915.7	45126.5	86129.4	61650.9	55224.7	250.019	33072.6	27771.5	0.0113523	39137.9	29417.7	8869.76	75.1641	8837.01	18188.4	5751.69	205.821	0.225791	-2.14694	0.220666	Down
A0A5C2G0H9		IGL c1926_light_IGKV2-30_IGKJ2 (Fragment)		50846.8	23369.9	11100.6	27300.3	7324.69	15593	67926.5	7693.79	6416.63	11027.5	250.019	12614.8	10390	250.019	250.019	18620.1	250.019	250.019	250.019	250.019	250.019	0.0100552	3965.92	6642.91	2002.91	167.5	22860	20835.5	6588.77	91.1441	5.7641	2.5271	0.219503	Up
A0A5C2G0I7		IGL c2788_light_IGKV3-20_IGKJ4 (Fragment)		2693428	250.019	250.019	250.019	1465118	250.019	1.33794e+06	1.62458e+06	1.30495e+06	3034411	715671	1.42118e+06	1.3719e+06	1.02135e+06	2.12441e+06	1.79064e+06	3.08709e+06	2.30359e+06	2.91676e+06	2.85109e+06	3560196	0.0462084	2.10581e+06	924440	278729	43.8996	1.14614e+06	1.13552e+06	359082	99.0728	0.544278	-0.877585	0.322562	Down
A0A5C2G0K6		IGL c1047_light_IGKV2-24_IGKJ4 (Fragment)		1.06016e+06	1.77379e+06	1.03939e+06	773927	428137	790386	429138	1.66161e+06	427506	250.019	474805	1.01245e+06	867241	172273	387129	258697	418666	180064	154901	138120	358062	0.0356501	402037	291562	87909.2	72.5211	838429	563305	178133	67.1857	2.08545	1.06036	0.302652	Up
A0A5C2G0X5		IGL c2948_light_IGKV3-15_IGKJ3 (Fragment)		232044	250.019	261116	250.019	186040	36280.8	250.019	67922.1	250.019	250.019	250.019	250.019	250.019	250.019	250.019	250.019	250.019	250.019	250.019	250.019	250.019	0.0238843	250.019	0	0	0	78465.3	105934	33499.4	135.008	313.837	8.29387	0.266243	Up
A0A5C2G110		IGL c2812_light_IGLV7-46_IGLJ3 (Fragment)		40106076	6.83891e+06	5.6481e+06	7687752	48382812	17547544	54954752	73105768	17900390	23139998	18668054	15737624	6940167	17253846	7254361	16525122	13689694	12158047	21098432	18180290	9776977	0.0470385	1.42984e+07	4.74684e+06	1.43123e+06	33.1983	2.95312e+07	2.33203e+07	7.37452e+06	78.9683	2.06535	1.04638	0.324295	Up
A0A5C2G123		IGL c2674_light_IGKV4-1_IGKJ2 (Fragment)		53878.8	58318.8	250.019	250.019	250.019	250.019	250.019	250.019	54711.3	117848	458977	250.019	250.019	195396	202737	163906	313541	247446	282650	120568	329438	0.000789214	210469	138576	41782.2	65.8414	28625.7	40813.3	12906.3	142.576	0.136009	-2.87823	0.122373	Down
A0A5C2G127		IGL c33_light_IGKV2-30_IGKJ1 (Fragment)		1.05269e+06	5898151	4.12612e+06	4.62924e+06	919663	6.16437e+06	844824	347292	548368	671779	841983	1.64944e+06	1.08933e+06	419427	864180	1.14932e+06	504723	338099	862232	695129	739484	0.0315668	832122	372253	112238	44.7353	2.52025e+06	2.38668e+06	754734	94.7	3.0287	1.5987	0.287754	Up
A0A5C2G146		IGL c2852_light_IGKV3-20_IGKJ2 (Fragment)		307754	56926.7	27690.2	292784	968961	380280	405013	474810	130399	541839	833148	538516	532325	401768	679052	393930	516436	738090	1.05353e+06	1.0305e+06	310119	0.0248719	638856	252037	75991.9	39.4512	358646	275226	87034.2	76.7405	0.561387	-0.832931	0.266243	Down
A0A5C2G172		IGL c73_light_IGKV2D-28_IGKJ5 (Fragment)		67685.1	50151.4	119334	250.019	4396.69	87157.3	250.019	15230.2	250.019	250.019	250.019	250.019	17385	250.019	250.019	250.019	250.019	250.019	250.019	250.019	250.019	0.0235795	1807.75	5166.4	1557.73	285.792	34495.4	43824.8	13858.6	127.045	19.082	4.25414	0.266243	Up
A0A5C2G199		IGL c3068_light_IGKV1-9_IGKJ3 (Fragment)		697.874	1026.72	250.019	64367.4	250.019	73510.1	2348.58	5663.41	47710.8	97569.3	6130.21	250.019	13507.6	276369	879854	250.019	250.019	419661	554813	268100	1.08206e+06	0.0283536	318295	382489	115325	120.168	29339.4	37674.4	11913.7	128.409	0.0921768	-3.43945	0.283142	Down
A0A5C2G1A1		IGL c2929_light_IGLV1-51_IGLJ2 (Fragment)		2114919	3235535	1427368	1.25405e+06	2155648	1.48938e+06	1.34148e+06	2.25755e+06	422104	958607	1.02559e+06	2605902	1566731	882171	911453	250.019	370629	1.74659e+06	250.019	250.019	250.019	0.0330676	828188	868866	261973	104.912	1.66566e+06	793409	250898	47.6332	2.01122	1.00807	0.291291	Up
A0A5C2G1A6		IGL c1715_light_IGKV1-27_IGKJ1 (Fragment)		819980	1.94362e+06	872531	397921	1.34546e+06	1344619	942586	1.97044e+06	789976	929229	3.31598e+06	2561127	2.59083e+06	1.18918e+06	1.07204e+06	950981	2168388	1.37184e+06	1.06176e+06	2.39455e+06	1.49574e+06	0.0296374	1.83385e+06	801516	241666	43.7066	1.13564e+06	510978	161585	44.9949	0.619262	-0.691378	0.283795	Down
A0A5C2G1D9		IGL c143_light_IGKV1D-39_IGKJ2 (Fragment)		5221076	5.28643e+06	3.31495e+06	1.84559e+06	1.20633e+06	5185942	2.11369e+06	2633940	2.25569e+06	3.56894e+06	7064091	5.69928e+06	7.32085e+06	5.1225e+06	5161685	6608473	5.62395e+06	6.24457e+06	2.2785e+06	5596481	2.91705e+06	0.00481399	5.42158e+06	1.57634e+06	475283	29.0752	3.26326e+06	1.5163e+06	479497	46.4659	0.601901	-0.732401	0.174118	Down
A0A5C2G1F8		IGL c2286_light_IGLV1-40_IGLJ3 (Fragment)		52589.5	250.019	234625	20331.3	548801	216677	234639	250.019	1063853	65929.1	287190	433268	137834	754757	552511	597493	1.71004e+06	639476	629407	476305	847885	0.0247661	642378	407069	122736	63.3691	243794	333864	105577	136.945	0.379518	-1.39776	0.266243	Down
A0A5C2G1H3		IGL c1317_light_IGKV1-5_IGKJ1 (Fragment)		250.019	250.019	250.019	250.019	250.019	250.019	250.019	250.019	218377	273488	250.019	1.10317e+06	250.019	160304	250.019	158992	258125	197214	777911	419939	268055	0.0386831	304042	347847	104880	114.408	49386.5	104400	33014.2	211.394	0.162433	-2.62208	0.308371	Down
A0A5C2G1I1		IGL c1327_light_IGKV3-15_IGKJ1 (Fragment)		36326.8	250.019	42450.7	250.019	9059.65	250.019	55663.1	58576	250.019	250.019	250.019	250.019	250.019	250.019	250.019	250.019	250.019	250.019	250.019	250.019	250.019	0.0148978	250.019	0	0	0	20332.6	24943.2	7887.72	122.676	81.3242	6.34561	0.244207	Up
A0A5C2G1P1		IGL c1387_light_IGKV4-1_IGKJ4 (Fragment)		1.10553e+06	649206	428644	829775	3.26782e+06	558328	476244	1.42354e+06	337571	1.34755e+06	802542	423604	411169	334706	404887	158995	416293	551453	624665	412560	484564	0.0409269	456858	164474	49590.9	36.0012	1.04242e+06	870698	275339	83.5265	2.28172	1.19012	0.314661	Up
A0A5C2G1W2		IGL c2904_light_IGKV4-1_IGKJ4 (Fragment)		41017	48396	59472.1	51399.2	55445.8	45864.6	62705.1	75528.4	58083.5	250.019	200302	93375.1	158581	232454	19238	198062	104506	63561.6	110878	130450	37827.5	0.00466088	122658	69159.7	20852.4	56.3843	49816.2	19930.1	6302.46	40.0073	0.40614	-1.29995	0.174118	Down
A0A5C2G1X5		IGL c3142_light_IGLV7-46_IGLJ3 (Fragment)		1.14476e+06	740568	250.019	250.019	250.019	250.019	1.38563e+06	250.019	305198	250.019	250.019	250.019	250.019	250.019	250.019	250.019	250.019	250.019	250.019	250.019	250.019	0.0391519	250.019	0	0	0	357766	536664	169708	150.004	1430.95	10.4828	0.310196	Up
A0A5C2G1X9		IGL c343_light_IGKV3-20_IGKJ1 (Fragment)		7454.75	231322	250.019	64458.8	51262.3	437607	250.019	492397	227628	54384.4	250.019	565642	425829	1.04569e+06	2.78442e+06	28630.7	1.0605e+06	240197	667729	1.29503e+06	24381.9	0.0396705	739846	814457	245568	110.085	156701	183643	58072.9	117.193	0.211803	-2.23921	0.312582	Down
A0A5C2G288		IGL c3398_light_IGKV1-9_IGKJ4 (Fragment)		12567.7	250.019	118536	250.019	24299.3	21528.7	113074	250.019	887284	828996	250.019	250.019	250.019	474566	811330	1.25891e+06	2072463	926262	1.27114e+06	1.18349e+06	1.82869e+06	0.0126543	893418	721234	217460	80.7275	200704	349561	110541	174.168	0.224647	-2.15427	0.231808	Down
A0A5C2G2A7		IGL c473_light_IGLV3-21_IGLJ3 (Fragment)		250.019	64176.1	158210	144778	234003	98384.5	42478.7	336048	159314	250.019	62038.8	220028	250.019	250.019	250.019	250.019	112956	250.019	250.019	250.019	250.019	0.0370038	36093	71197.5	21466.8	197.261	123789	106156	33569.6	85.7557	3.42973	1.7781	0.303608	Up
A0A5C2G2K9		IGL c3511_light_IGKV1-9_IGKJ4 (Fragment)		12451.9	250.019	26599.8	250.019	3245.17	250.019	57711.4	22647	35646.3	97904.9	9708.51	19535.4	16245.4	37165.9	87757.2	50576.9	103876	108400	77713.1	140729	25862.2	0.0478369	61597.2	44382.1	13381.7	72.0521	25695.7	31570.3	9983.41	122.863	0.417156	-1.26134	0.326017	Down
A0A5C2G2S0		IGL c2890_light_IGLV1-44_IGLJ2 (Fragment)		347288	435624	190160	412668	960492	1.01945e+06	613970	501986	732879	830800	520216	807121	613017	849337	947947	1.56631e+06	1.17551e+06	651395	1.47238e+06	798670	1.02813e+06	0.0202471	948185	339195	102271	35.7731	604532	274947	86945.8	45.481	0.637567	-0.649351	0.25952	Down
A0A5C2G316		IGL c2990_light_IGLV2-8_IGLJ3 (Fragment)		1.05269e+06	1.67837e+06	1.08937e+06	3900336	3.18856e+06	3.69704e+06	1.7536e+06	4.35797e+06	5822548	5.53918e+06	5.55355e+06	1.56891e+06	3.38516e+06	7364593	2496568	7385451	7.76126e+06	5.51529e+06	3.85885e+06	5864304	9438544	0.02587	5.47204e+06	2.43771e+06	734997	44.5484	3.20797e+06	1.7607e+06	556782	54.8852	0.586247	-0.77042	0.268884	Down
A0A5C2G3B3		IGL c3642_light_IGLV1-40_IGLJ1 (Fragment)		1.45079e+06	246911	246215	137669	956590	270207	697826	391202	766934	393618	503917	961943	540966	889355	727031	781940	870944	865482	1.26499e+06	1.18122e+06	886000	0.0470533	861253	230567	69518.5	26.7711	555796	411964	130274	74.1214	0.645334	-0.631883	0.324295	Down
A0A5C2G3E4		IGL c2465_light_IGKV2D-29_IGKJ2 (Fragment)		5177576	7298959	3175173	1.61148e+06	2023174	1.69624e+06	2.19267e+06	1605821	1.08933e+06	1.66219e+06	3.5645e+06	2061494	1.48457e+06	663231	436460	737675	1906551	1.44097e+06	766282	705842	1.23576e+06	0.0490701	1.36394e+06	905213	272932	66.3675	2.75326e+06	1.97941e+06	625945	71.8934	2.01861	1.01336	0.329491	Up
A0A5C2G3L5		IGL c2027_light_IGLV1-40_IGLJ3 (Fragment)		214070	1.05123e+06	386924	668605	2.6327e+06	456452	2.3636e+06	1.74889e+06	3086765	3.23887e+06	988956	4004786	3.27944e+06	4294912	4.87709e+06	4.94412e+06	5392314	5260820	5.32443e+06	3.73213e+06	6.08247e+06	9.09472e-05	4.38013e+06	1.39408e+06	420330	31.8272	1.58481e+06	1.17542e+06	371700	74.1678	0.361818	-1.46666	0.0357259	Down
A0A5C2G3L6		IGL c3878_light_IGKV1-5_IGKJ1 (Fragment)		152841	77220.7	156471	90198.9	162266	250.019	53827	20012.7	330559	336533	42676.7	40146.6	123201	199508	401148	256590	556505	348319	660290	453389	523923	0.0217858	327791	212208	63983.2	64.739	138018	117192	37059.2	84.9104	0.421055	-1.24792	0.25952	Down
A0A5C2G3R3		IGL c3190_light_IGKV3-20_IGKJ1 (Fragment)		965180	14547.1	114593	18111.5	1.16933e+06	173707	16374.9	414852	1935300	2.68645e+06	118914	1.45839e+06	108590	1.57613e+06	3.90778e+06	1.38843e+06	2.82106e+06	1.49837e+06	2.99027e+06	2514520	3047352	0.0213725	1.94816e+06	1.21824e+06	367313	62.5327	750844	933323	295143	124.303	0.385411	-1.37553	0.25952	Down
A0A5C2G3R6		IGL c3779_light_IGKV3-20_IGKJ3 (Fragment)		591444	250.019	1.26823e+06	355935	349059	353114	301511	250.019	250.019	250.019	276843	250.019	250.019	250.019	250.019	250.019	250.019	250.019	250.019	250.019	250.019	0.0239759	25394.9	83396	25144.8	328.397	322030	392332	124066	121.831	12.6809	3.66459	0.266243	Up
A0A5C2G3R9		IGL c3941_light_IGKV3-11_IGKJ3 (Fragment)		121351	250.019	250.019	12164.5	167561	250.019	136826	64178.4	250.019	250.019	250.019	250.019	51733.7	250.019	250.019	250.019	250.019	250.019	250.019	250.019	250.019	0.0413947	4930.36	15522.9	4680.34	314.844	50333.1	67046.5	21202	133.205	10.2088	3.35174	0.314661	Up
A0A5C2G3U6		IGL c3968_light_IGLV3-21_IGLJ3 (Fragment)		334359	250.019	59393	337479	937226	250.019	562907	926119	1135546	250.019	250.019	250.019	250.019	250.019	250.019	250.019	250.019	250.019	250.019	52638.8	250.019	0.00452507	5012.63	15795.8	4762.62	315.12	429378	438176	138563	102.049	85.6591	6.42053	0.174118	Up
A0A5C2G3Y2		IGL c3882_light_IGKV1-5_IGKJ5 (Fragment)		220369	291043	398754	235570	367130	171791	211640	331904	689944	427864	190278	273629	376164	1.12819e+06	437424	609030	902564	486831	1.14091e+06	838568	646116	0.0145237	639064	326983	98589.2	51.166	334601	151484	47903.5	45.2731	0.52358	-0.933519	0.244207	Down
A0A5C2G461		IGL c2725_light_IGLV1-40_IGLJ1 (Fragment)		250.019	250.019	250.019	250.019	250.019	250.019	250.019	250.019	25730.1	44811.5	250.019	250.019	250.019	1.45635e+06	2.04761e+06	5721.83	27633.9	250.019	16528.2	949350	1.62746e+06	0.0436451	557423	802913	242087	144.04	7254.18	15435.8	4881.23	212.785	0.0130138	-6.26382	0.317618	Down
A0A5C2G481		IGL c2745_light_IGKV1-6_IGKJ1 (Fragment)		58579	36531	10613.7	14018.2	25776.1	7291.82	51078.1	69418.2	6219.49	30528.3	71703.5	21455.4	10713	289310	45605.3	37722.5	56188.1	177298	89000.4	77664.6	156511	0.0319327	93924.7	83017.7	25030.8	88.3875	31005.4	22553.5	7132.03	72.7404	0.330109	-1.59899	0.287754	Down
A0A5C2G4L9		IGL c3376_light_IGKV1-9_IGKJ3 (Fragment)		12169.2	250.019	250.019	250.019	145626	250.019	250.019	250.019	1638704	1953987	11280.7	250.019	250.019	1.55749e+06	1069938	1.36094e+06	2907093	1.3797e+06	2.17028e+06	1.19923e+06	2.91612e+06	0.0296924	1.32478e+06	1.05471e+06	318008	79.6142	375199	754029	238445	200.968	0.283216	-1.82003	0.283795	Down
A0A5C2G4X6		IGL c3984_light_IGLV1-47_IGLJ2 (Fragment)		219695	47753.7	11562	250.019	83810.1	250.019	104390	408549	573.582	642.248	250.019	250.019	3874.55	250.019	250.019	3381.83	2741.6	1661.42	7531.57	1892.94	250.019	0.0448738	2030.37	2280.35	687.55	112.312	87747.6	132715	41968	151.246	43.2176	5.43355	0.317875	Up
A0A5C2G4Z6		IGL c4004_light_IGLV1-40_IGLJ2 (Fragment)		31298.1	250.019	75938.3	200026	2.05191e+06	235363	94854.1	1028023	4.34532e+06	3506525	585152	583720	6.04056e+06	3185996	3.75626e+06	3.50767e+06	4211369	4.15949e+06	4.21787e+06	2779833	4.66556e+06	0.00471247	3.42668e+06	1.63994e+06	494461	47.8581	1.15695e+06	1.60453e+06	507395	138.686	0.33763	-1.56648	0.174118	Down
A0A5C2G543		IGL c3690_light_IGKV1-5_IGKJ4 (Fragment)		9786.72	214089	451669	91821.9	5508.42	333385	19565.2	250.019	279146	242009	165496	337314	359499	304118	421505	1.87485e+06	1.60664e+06	1.25063e+06	1.2722e+06	264031	1.49632e+06	0.00415653	850237	646239	194848	76.007	164723	161616	51107.6	98.1141	0.193738	-2.36782	0.174118	Down
A0A5C2G570		IGL c2717_light_IGKV4-1_IGKJ2 (Fragment)		2.59796e+06	1.04043e+06	834690	1.44517e+06	1.58937e+06	8488180	2795564	13728293	19559564	41791136	19975582	13351438	21851138	24302724	29707352	31148962	1.31866e+06	34548220	27496520	29663436	32116320	0.00817657	2.41346e+07	9.76556e+06	2.94443e+06	40.463	9.38704e+06	1.30358e+07	4.12228e+06	138.87	0.388946	-1.36236	0.217739	Down
A0A5C2G5P7		IGL c2977_light_IGLV1-40_IGLJ3 (Fragment)		2.08855e+06	1.02728e+06	492454	739638	2.2239e+06	1043058	2469676	2.68665e+06	2.71659e+06	2.66507e+06	1.68633e+06	2919213	610900	3218330	4.52653e+06	2.98562e+06	5764532	2.38746e+06	4.87722e+06	1.98378e+06	3999467	0.0228246	3.17813e+06	1.51798e+06	457688	47.7634	1.81529e+06	887432	280631	48.8866	0.571182	-0.807978	0.265592	Down
A0A5C2G5W6		IGL c3185_light_IGKV3-20_IGKJ1 (Fragment)		259056	126497	170358	230840	191685	375473	286718	362966	757832	307923	212765	1.25958e+06	206324	3.22547e+06	173494	1.54512e+06	136665	1.35874e+06	723257	356027	1.33695e+06	0.0433455	957672	933230	281379	97.4478	306935	177680	56187.3	57.8885	0.320501	-1.6416	0.317618	Down
A0A5C2G6K5		IGL c3297_light_IGKV1D-39_IGKJ2 (Fragment)		275222	349115	3340.36	352375	249596	63665.3	168558	122070	557414	381135	484199	526789	2.46639e+06	723380	582047	442147	798494	824833	1.00833e+06	430724	471619	0.0106473	796269	584871	176345	73.4514	252249	167050	52825.8	66.2241	0.316789	-1.65841	0.219503	Down
A0A5C2G6M0		IGL c2073_light_IGKV3-20_IGKJ3 (Fragment)		24094.7	46259.8	159153	37248.8	57269.1	148184	14937.3	255280	1.16684e+06	1.08652e+06	115155	476884	535466	996565	652690	2.54757e+06	3.03008e+06	3.38824e+06	1.26388e+06	1.81989e+06	202071	0.0135265	1.36623e+06	1.16259e+06	350534	85.0949	299579	442800	140026	147.807	0.219275	-2.18919	0.241629	Down
A0A5C2G6W9		IGH c332_heavy__IGHV4-61_IGHD3-10_IGHJ6 (Fragment)		98957.3	276436	170010	338598	227966	91660.5	83734.6	271611	250.019	250.019	250.019	250.019	9552.01	39363.8	110222	250.019	250.019	250.019	250.019	250.019	250.019	0.0012696	14648.9	33807.9	10193.5	230.787	155947	119126	37671	76.3889	10.6456	3.41219	0.125909	Up
A0A5C2G762		IGH c158_heavy__IGHV1-8_IGHD6-13_IGHJ4 (Fragment)		250.019	250.019	20747.8	3811.52	32764.1	250.019	9921.1	33819.3	250.019	250.019	250.019	250.019	6289.41	250.019	250.019	250.019	250.019	250.019	250.019	250.019	250.019	0.0364109	799.055	1820.95	549.036	227.887	10231.4	13800.8	4364.2	134.887	12.8044	3.67856	0.302652	Up
A0A5C2G772		IGL c3557_light_IGKV1-5_IGKJ1 (Fragment)		183598	155117	60495.7	46805.3	166413	158121	41996.4	53052.2	75493.1	118344	606280	112822	66090.6	188748	215522	304684	135181	166017	183911	189068	132042	0.0490817	209124	145382	43834.3	69.5193	105944	56132.6	17750.7	52.9835	0.506606	-0.981064	0.329491	Down
A0A5C2G7A1		IGL c334_light_IGLV2-23_IGLJ1 (Fragment)		8.13632e+06	1.88523e+06	2.02515e+06	2.09682e+06	5.41632e+06	2.11865e+06	5.91399e+06	6801860	2.26762e+06	3.47145e+06	2436339	1.40345e+06	2.8859e+06	2159215	1.90559e+06	2.53809e+06	2.45792e+06	1.88723e+06	2.54433e+06	2.52047e+06	2.47993e+06	0.0268225	2.29259e+06	416309	125522	18.1589	4.01334e+06	2.34382e+06	741182	58.4008	1.75057	0.807827	0.275506	Up
A0A5C2G7D4		IGL c338_light_IGLV3-25_IGLJ1 (Fragment)		253028	250.019	317458	617047	172401	394966	250.019	1.15207e+06	439111	436733	1.01374e+06	491159	1652966	1.36616e+06	621212	297622	856376	1144946	932426	307188	697047	0.0112892	852804	428486	129194	50.2444	378331	335119	105974	88.5783	0.443632	-1.17256	0.220666	Down
A0A5C2G7J2		IGH c582_heavy__IGHV4-59B_IGHD2-15_IGHJ1 (Fragment)		268877	217142	311192	250.019	240629	131378	250.019	39314.5	250.019	250.019	69089.4	250.019	250.019	250.019	89573.2	250.019	250.019	134708	1344.51	250.019	250.019	0.0345559	26951.4	47911.4	14445.8	177.77	120953	127670	40372.9	105.553	4.48783	2.16602	0.298447	Up
A0A5C2G7L1		IGL c2393_light_IGKV2D-29_IGKJ2 (Fragment)		2373.6	250.019	118153	44753.7	24812.3	81687.2	250.019	250.019	250.019	250.019	250.019	4134.1	250.019	250.019	250.019	250.019	250.019	250.019	250.019	250.019	250.019	0.0475891	603.117	1171.09	353.098	194.173	27303	41903.2	13251	153.475	45.2698	5.50048	0.325098	Up
A0A5C2G7S6		IGL c284_light_IGKV1-5_IGKJ1 (Fragment)		31562.5	76137.8	75214.5	30104.2	250.019	129394	105039	50907	236434	220266	14830.7	21634.4	250.019	250.019	250.019	250.019	138085	250.019	250.019	250.019	250.019	0.00880903	16050	41136.8	12403.2	256.303	95530.9	79498.9	25139.8	83.218	5.95206	2.57339	0.219503	Up
A0A5C2G7U8		IGL c548_light_IGKV4-1_IGKJ4 (Fragment)		787538	40449.2	203773	297734	551992	943845	436876	624657	631242	526623	419651	208352	302888	807362	1.08064e+06	1348457	1.81547e+06	1.75664e+06	748505	1.55291e+06	971728	0.0210602	1.00115e+06	567606	171140	56.6955	504473	270696	85601.5	53.6591	0.503895	-0.988805	0.25952	Down
A0A5C2G7W7		IGL c457_light_IGLV6-57_IGLJ2 (Fragment)		174039	273790	295659	148532	171948	73793.9	318161	171271	428500	286863	168227	579773	1.01404e+06	932173	608387	334707	316882	240541	483631	510346	1.01845e+06	0.00424717	564287	305135	92001.6	54.0744	234256	104053	32904.5	44.4186	0.415136	-1.26834	0.174118	Down
A0A5C2G810		IGL c507_light_IGKV1D-39_IGKJ1 (Fragment)		876148	1.74716e+06	15369344	2.79538e+06	250.019	1.06712e+06	402133	250.019	3705227	5450790	16986096	3738411	58262648	14445531	13613193	14546118	8.09662e+06	17231754	9429147	11046359	14478986	0.0113555	1.65341e+07	1.44172e+07	4.34694e+06	87.1967	3.14138e+06	4.6417e+06	1.46784e+06	147.76	0.189994	-2.39597	0.220666	Down
A0A5C2G868		IGH c598_heavy__IGHV3-7_IGHD3-16_IGHJ4 (Fragment)		1.92235e+06	1.05632e+06	1.61705e+06	287551	2.05704e+06	1.50151e+06	1.62625e+06	67355	313400	496587	746566	364482	220697	620602	454717	586722	389427	633765	530122	380933	1.28913e+06	0.0411477	565197	283278	85411.4	50.1202	1.09454e+06	745994	235904	68.1558	1.93657	0.953502	0.314661	Up
A0A5C2G8G0		IGH + IGL c100_heavy_IGHV3-33_IGHD3-16_IGHJ3 (Fragment)		5134.92	250.019	250.019	250.019	6174.95	250.019	250.019	250.019	1.04573e+06	1.57561e+06	250.019	250.019	250.019	3.00966e+06	1.77075e+06	2421916	1.31863e+06	1.7236e+06	1.13007e+06	250.019	1.70144e+06	0.0244884	1.18882e+06	1.06745e+06	321848	89.7904	263415	565911	178957	214.836	0.221576	-2.17413	0.266243	Down
A0A5C2G8G7		IGL c320_light_IGKV1-5_IGKJ4 (Fragment)		339535	315678	294827	186825	705151	381017	910308	1.01959e+06	250.019	215679	444930	414446	135019	250.019	107578	250.019	250.019	250.019	250.019	250.019	250.019	0.00778779	100338	169937	51237.9	169.364	436886	330862	104628	75.7318	4.35412	2.12238	0.212031	Up
A0A5C2G8N0		IGH c284_heavy__IGHV1-69_IGHD4-4_IGHJ4 (Fragment)		250.019	250.019	250.019	250.019	250.019	250.019	250.019	250.019	111812	79789.2	187091	228286	250.019	250.019	284216	66544.2	395765	250.019	133419	167819	204543	0.00561841	151676	127943	38576.4	84.3533	19360.2	40988.7	12961.8	211.717	0.127642	-2.96982	0.184329	Down
A0A5C2G8S7		IGL c215_light_IGLV6-57_IGLJ3 (Fragment)		854524	408464	582940	1530687	77462.4	250.019	690552	1358494	250.019	250.019	250.019	52805.2	683649	388618	250.019	250.019	250.019	196912	250.019	250.019	250.019	0.0307483	120339	223755	67464.8	185.937	550387	565585	178854	102.761	4.57362	2.19334	0.286188	Up
A0A5C2G8T8		IGH + IGL c93_heavy_IGHV4-39_IGHD3-3_IGHJ4 (Fragment)		1.88161e+06	3.10071e+06	2.41391e+06	2.69394e+06	1.73737e+06	3.56633e+06	1.90829e+06	3211519	980820	1.30173e+06	1.38397e+06	1992874	1833103	847642	847802	829385	1.34724e+06	1.0971e+06	1.02322e+06	1.04636e+06	1.26081e+06	0.00161298	1.22814e+06	391278	117975	31.8594	2.27962e+06	857737	271240	37.6263	1.85616	0.892323	0.132541	Up
A0A5C2G8X9		IGL c4105_light_IGKV2-30_IGKJ1 (Fragment)		541636	712772	258604	254715	907026	741634	291049	302065	194678	227815	445602	384299	274141	189245	157994	306478	179505	250.019	278217	250.019	372374	0.033873	235305	146745	44245.3	62.3638	443199	259783	82150.5	58.6153	1.88351	0.913424	0.294856	Up
A0A5C2G9I6		IGL c442_light_IGKV1D-39_IGKJ1 (Fragment)		859761	252805	138943	124384	901473	1.25863e+06	560138	1.08485e+06	730077	1.36451e+06	1221666	2.20621e+06	55470.8	1.1455e+06	1.64777e+06	1.43274e+06	1862935	1089139	1724161	542298	927464	0.0370536	1.25958e+06	614396	185247	48.778	727557	450536	142472	61.9245	0.57762	-0.791807	0.303608	Down
A0A5C2G9J5		IGL c495_light_IGKV3-20_IGKJ1 (Fragment)		73686.3	199287	507932	104214	135033	17764.4	45160.5	55158.9	50369.3	100688	778233	836930	173765	907870	475333	645796	191544	67786.5	400805	81074.7	262209	0.0096748	438304	311055	93786.7	70.9678	128929	143015	45225.3	110.925	0.294155	-1.76535	0.219503	Down
A0A5C2G9L9		IGL c556_light_IGKV3-20_IGKJ3 (Fragment)		229109	250.019	20968.4	128239	165551	34531.6	54723.3	724567	1.27042e+06	670423	295010	604415	86882.2	629342	2991875	5016299	4.88545e+06	9321665	4.72913e+06	6.82903e+06	4328797	0.0028803	3.61072e+06	3.001e+06	904837	83.1138	329878	421795	133383	127.864	0.0913608	-3.45228	0.167333	Down
A0A5C2GA13		IGH + IGL c563_heavy_IGHV4-59B_IGHD5-12_IGHJ4 (Fragment)		4494850	3.45632e+06	3.49142e+06	6.87984e+06	6612691	5622749	250.019	6976539	302429	591745	3.3096e+06	3732295	3.78293e+06	367054	264855	296389	437045	769686	386139	397483	723209	0.0157879	1.31515e+06	1.48575e+06	447969	112.971	3.84288e+06	2.75784e+06	872106	71.7649	2.92201	1.54696	0.244207	Up
A0A5C2GA79		IGL c302_light_IGKV3-20_IGKJ1 (Fragment)		250.019	114451	110453	250.019	121496	104024	250.019	16211	2.71107e+06	4.10142e+06	250.019	654971	250.019	2.18687e+06	2.34343e+06	1229062	3.80277e+06	3.14067e+06	4.00043e+06	2.78746e+06	4.18799e+06	0.0357934	2.2122e+06	1.54981e+06	467286	70.0577	727987	1.45002e+06	458536	199.182	0.329079	-1.60349	0.302652	Down
A0A5C2GA91		IGL c3373_light_IGKV4-1_IGKJ1 (Fragment)		451518	218463	250.019	121401	406342	208383	154895	508779	800956	1.04959e+06	1.55584e+06	401693	1.18078e+06	1.50963e+06	1.11417e+06	1.61839e+06	1.5232e+06	1.246e+06	685418	1031845	1433124	5.12504e-05	1.2091e+06	386738	116606	31.9856	392058	327244	103483	83.4682	0.324256	-1.62479	0.0357259	Down
A0A5C2GAC3		IGH + IGL c176_heavy_IGHV3-15_IGHD7-27_IGHJ4 (Fragment)		55807.9	527629	275436	242407	1.08376e+06	250.019	235812	379526	3.9568e+06	689352	250.019	1.06348e+06	598078	4.00279e+06	3.94659e+06	3636964	3.10725e+06	2106384	3.30515e+06	3.90817e+06	2.86725e+06	0.00465037	2.59476e+06	1.44098e+06	434472	55.5343	744678	1.17267e+06	370830	157.473	0.286993	-1.80091	0.174118	Down
A0A5C2GAF5		IGH + IGL c75_light_IGKV3-15_IGKJ3 (Fragment)		94791.7	9437.24	250.019	37361.8	7833.05	250.019	113230	15673.4	352557	693552	50621.9	6271.36	176795	246702	604969	396991	1.39419e+06	293478	831827	335416	615001	0.0394808	450206	400168	120655	88.8855	132494	224441	70974.5	169.398	0.294296	-1.76466	0.311941	Down
A0A5C2GAX2		IGH + IGL c331_heavy_IGHV4-39_IGHD1-1_IGHJ6 (Fragment)		7.04283e+06	5315113	5.39919e+06	10538501	1.22254e+06	8705779	8503542	10838028	422564	1.24716e+06	5119510	5657990	5.90858e+06	631376	409616	423667	672643	250.019	603719	526096	1.12458e+06	0.00945509	1.91618e+06	2.36323e+06	712540	123.33	5.92352e+06	3.88693e+06	1.22915e+06	65.6185	3.09131	1.62822	0.219503	Up
A0A5C2GB27		IGH + IGL c285_light_IGKV1-5_IGKJ2 (Fragment)		141451	380436	508926	349591	478780	716042	320411	826409	1.7603e+06	2370149	390333	775427	413948	2.08525e+06	2.48527e+06	2.21772e+06	2.68388e+06	2571347	2.07877e+06	2.75137e+06	3.20602e+06	0.0056401	1.96903e+06	985147	297033	50.0321	785249	716753	226657	91.2771	0.3988	-1.32626	0.184329	Down
A0A5C2GB72		IGH + IGL c4_light_IGKV3-15_IGKJ4 (Fragment)		245560	98304.4	250.019	250.019	112540	250.019	88937.2	250.019	499440	250.019	250.019	250.019	250.019	250.019	250.019	250.019	250.019	250.019	250.019	250.019	250.019	0.0430572	250.019	0	0	0	104603	160056	50614.1	153.012	418.38	8.70867	0.317618	Up
A0A5C2GBE0		IGH + IGL c526_light_IGLV3-1_IGLJ1 (Fragment)		118057	250.019	250.019	250.019	211775	250.019	287783	259074	1.31209e+06	1.42535e+06	250.019	250.019	250.019	1.2432e+06	801875	1.15791e+06	1.64172e+06	769923	1.14205e+06	2.31034e+06	2.91916e+06	0.0459606	1.08972e+06	944372	284739	86.6618	361513	543140	171756	150.241	0.331748	-1.59184	0.321613	Down
A0A5C2GBI3		IGH + IGL c392_heavy_IGHV1-18_IGHD3-9_IGHJ6 (Fragment)		48004.7	250.019	11448.3	134412	102453	43676	66697.3	257042	250.019	49205.9	363654	110265	164383	331977	218574	505442	364583	564822	169904	29252.7	92666.1	0.00438055	265048	173891	52430.2	65.6076	71343.9	78136	24708.8	109.52	0.269174	-1.89339	0.174118	Down
A0A5C2GBK5		IGH + IGL c646_heavy_IGHV1-69_IGHD1-7_IGHJ6 (Fragment)		349738	814012	494215	805672	1067207	831745	666929	567227	334437	736920	202926	253012	538477	676166	408311	268395	564544	208340	484710	297822	271066	0.00369204	379434	163301	49237.1	43.0381	666810	231924	73340.9	34.7812	1.75738	0.813429	0.174118	Up
A0A5C2GBK7		IGL c23_light_IGKV3-15_IGKJ4 (Fragment)		1.20963e+06	876456	945932	116575	1.92106e+06	3.47463e+06	1.47741e+06	291458	6.48952e+06	4.69495e+06	1.75398e+06	1.89601e+06	2.96244e+06	3.12575e+06	6473704	5385476	6601084	5.13484e+06	6.22586e+06	4.23582e+06	3.68866e+06	0.0185773	4.31669e+06	1.77224e+06	534349	41.0554	2.14976e+06	2.08467e+06	659231	96.9721	0.498012	-1.00575	0.254421	Down
A0A5C2GBU1		IGH + IGL c108_light_IGKV2-28_IGKJ2 (Fragment)		8621.97	6114.31	17901	1045.86	9044.69	2782.9	549.966	250.019	17414.4	250.019	250.019	2490.6	250.019	83430.8	40383.3	35222	35533.9	17440.8	30052.5	43966.1	41109.6	0.00849105	30011.8	24543.1	7400.04	81.7783	6397.52	6808.67	2153.09	106.427	0.213167	-2.22995	0.219503	Down
A0A5C2GBV5		IGH + IGL c632_light_IGLV2-11_IGLJ1 (Fragment)		1.25725e+06	1.10508e+06	726154	292397	289205	250.019	36079.8	250.019	343954	21570.7	250.019	73986.1	250.019	250.019	250.019	250.019	120420	250.019	196242	250.019	167939	0.0216545	50939.7	76253.7	22991.4	149.694	407218	466679	147577	114.602	7.99413	2.99894	0.25952	Up
A0A5C2GBW3		IGH + IGL c552_heavy_IGHV4-59_IGHD3-3_IGHJ5 (Fragment)		496105	202100	343293	509463	336587	671300	202293	441422	571426	250.019	651204	579769	158045	250.019	250.019	250.019	357979	250.019	250.019	250.019	250.019	0.0422344	158977	252055	75997.4	158.548	377424	201692	63780.6	53.4391	2.37408	1.24737	0.314679	Up
A0A5C2GBZ9		IGH + IGL c178_light_IGKV3-15_IGKJ5 (Fragment)		26499	7316.18	24429.9	34675.8	73838.3	29484.4	117993	56791.5	250.019	18768.1	39584.4	28982.9	517.184	250.019	250.019	250.019	1071.63	250.019	250.019	250.019	250.019	0.0107047	6536.93	13923.9	4198.2	213.003	39004.6	35217.8	11136.8	90.2915	5.9668	2.57696	0.219503	Up
A0A5C2GC12		IGH + IGL c308_heavy_IGHV3-7_IGHD6-19_IGHJ4 (Fragment)		2.37368e+06	250.019	981584	1841664	2.48453e+06	1.88035e+06	1.9346e+06	2.83452e+06	250.019	250.019	1.16915e+06	1.2467e+06	2129974	250.019	250.019	250.019	250.019	522789	250.019	250.019	260348	0.0294465	484588	722217	217757	149.038	1.43317e+06	1.10231e+06	348579	76.9139	2.9575	1.56438	0.283795	Up
A0A5C2GC23		IGH + IGL c123_light_IGKV3-20_IGKJ4 (Fragment)		606021	52442.8	254625	393843	243231	153890	367533	89775.2	549380	1.54513e+06	173713	234313	521460	587161	1.24496e+06	995089	940646	1.1688e+06	1.827e+06	1.4066e+06	1.86303e+06	0.0201743	996617	579178	174629	58.1144	425588	433840	137192	101.939	0.427032	-1.22758	0.25952	Down
A0A5C2GC35		IGH + IGL c4_light_IGKV1-39_IGKJ2 (Fragment)		29073.3	250.019	19944	250.019	15920.4	350687	250.019	30826.2	1.27444e+06	1.01325e+06	35736.2	250.019	8244.37	896624	1.37057e+06	1.29821e+06	1.58572e+06	765702	861254	720381	1.02946e+06	0.0383168	779287	557695	168151	71.5648	273489	474732	150123	173.584	0.350948	-1.51067	0.308328	Down
A0A5C2GCD3		IGH + IGL c114_light_IGKV3-15_IGKJ4 (Fragment)		232700	250.019	14112.2	49934.1	435023	57215.8	152013	292173	404835	761144	87464.4	632587	198466	274937	668568	723373	1.54025e+06	452672	1.19477e+06	539119	698854	0.0177567	637370	425232	128212	66.7168	239940	241604	76401.9	100.694	0.376453	-1.40946	0.250256	Down
A0A5C2GCE0		IGH + IGL c263_light_IGKV1-27_IGKJ3 (Fragment)		6491.33	92633.1	75917.6	50935.8	32414.2	69628.1	109385	30732.3	318105	434174	134696	291686	302086	414215	667038	389297	1.01755e+06	273530	416875	605934	256976	0.00238568	433626	247266	74553.6	57.023	122042	140058	44290.1	114.762	0.281444	-1.82908	0.157625	Down
A0A5C2GCJ9		IGL c313_light_IGKV1D-17_IGKJ3 (Fragment)		1.8252e+06	1.05516e+06	1.42433e+06	2.22999e+06	2.63274e+06	1.23387e+06	1.27124e+06	2.2972e+06	2.83198e+06	5023761	2.98101e+06	2818477	1.43027e+06	11436585	3.7945e+06	4202980	4469430	3577878	3987189	1.89145e+06	5931031	0.0390416	4.22916e+06	2.6911e+06	811396	63.6319	2.18255e+06	1.17456e+06	371429	53.8161	0.516071	-0.954358	0.310176	Down
A0A5C2GCL3		IGH + IGL c333_light_IGKV4-1_IGKJ4 (Fragment)		1.0525e+06	807387	176719	108174	721941	167389	489979	1.20328e+06	1.90286e+06	1.73877e+06	1.28052e+06	497625	405234	1.60357e+06	1.39593e+06	2.45478e+06	4.33675e+06	2.06549e+06	2.71585e+06	1.52108e+06	2184145	0.0186705	1.86009e+06	1.09873e+06	331279	59.0686	836900	639438	202208	76.4055	0.449925	-1.15224	0.254485	Down
A0A5C2GCU8		IGH + IGL c568_heavy_IGHV3-23_IGHD2-21_IGHJ3 (Fragment)		250.019	250.019	250.019	250.019	250.019	250.019	250.019	3570.57	997488	71112.1	250.019	250.019	250.019	1050374	11565.4	1.16942e+06	1.04816e+06	1.06386e+06	811398	1.11509e+06	1.18542e+06	0.00909241	677822	543558	163889	80.1918	107392	313532	99147.6	291.951	0.158437	-2.65802	0.219503	Down
A0A5C2GCZ1		IG c698_heavy_IGHV1-18_IGHD3-16_IGHJ5 (Fragment)		250.019	656882	103757	462861	250.019	159773	250.019	250.019	911471	320521	370093	375853	530860	678860	587501	763738	909753	329723	666338	1.49324e+06	250.019	0.0372274	609655	383538	115641	62.9106	261626	321638	101711	122.938	0.429138	-1.22049	0.304165	Down
A0A5C2GD14		IG c725_heavy_IGHV1-18_IGHD6-6_IGHJ4 (Fragment)		250.019	679533	789959	9059.43	73752.3	1.3687e+06	1295042	1.4843e+06	155820	60533.1	36027.3	24193.6	36991.4	11862.1	46598.9	82967.1	371410	232862	111454	105234	58648.5	0.01696	101659	108570	32734.9	106.798	591695	612088	193559	103.446	5.82039	2.54112	0.245283	Up
A0A5C2GD34		IGH + IGL c364_light_IGLV3-21_IGLJ2 (Fragment)		250.019	250.019	191994	174779	250.019	250.019	122880	250.019	250.019	58070.2	250.019	250.019	3915.84	250.019	250.019	250.019	250.019	250.019	4660.81	250.019	23345.6	0.0419079	3083.86	6913.49	2084.49	224.183	54922.4	78681.4	24881.3	143.259	17.8096	4.15459	0.314679	Up
A0A5C2GDA1		IG c674_heavy_IGHV1-69_IGHD3-22_IGHJ4 (Fragment)		865651	1.79658e+06	1.82358e+06	2.82151e+06	550681	2494715	633539	1.23923e+06	250.019	250.019	150898	250.019	250.019	250.019	250.019	250.019	250.019	250.019	250.019	250.019	250.019	0.000661166	13945.3	45422.2	13695.3	325.716	1.2226e+06	987694	312336	80.7864	87.6709	6.45403	0.122373	Up
A0A5C2GDA7		IGH + IGL c23_light_IGKV1-5_IGKJ1 (Fragment)		25614.1	250.019	250.019	6113.34	96123.8	9089.27	46693	83346.6	2.10655e+06	1.77418e+06	1.23264e+06	250.019	13393	1.62093e+06	2.19216e+06	2103943	2.51001e+06	1.19061e+06	1.47061e+06	1.30692e+06	1.58008e+06	0.0125173	1.38378e+06	800063	241228	57.8173	414821	808541	255683	194.913	0.299775	-1.73805	0.230768	Down
A0A5C2GDB6		IGH + IGL c464_light_IGKV3-15_IGKJ1 (Fragment)		64938.5	250.019	250.019	250.019	367194	250.019	123659	539837	882057	930403	19231.6	1112815	65411.8	521218	3723046	877929	519731	2.5173e+06	584672	865054	975134	0.0469647	1.07105e+06	1.10344e+06	332700	103.024	290909	371657	117528	127.757	0.271611	-1.88039	0.324295	Down
A0A5C2GDY8		IGH + IGL c247_heavy_IGHV3-48_IGHD3-9_IGHJ6 (Fragment)		102648	42797.2	121437	256821	250.019	60288.4	55620.1	510398	250.019	88144.1	250.019	41118.6	250.019	250.019	250.019	67257.3	124751	250.019	250.019	250.019	250.019	0.0468792	21375.2	40928.8	12340.5	191.478	123865	154434	48836.4	124.679	5.79483	2.53477	0.324295	Up
A0A5C2GE53		IGH + IGL c327_heavy_IGHV3-21_IGHD6-6_IGHJ2 (Fragment)		174381	1.82198e+06	5737233	1.59356e+06	410795	1.62263e+06	90255.5	3.38381e+06	2.3426e+06	2.52822e+06	8616018	5.85854e+06	6983663	2.89341e+06	541590	3546101	2626559	3031948	2.07519e+06	3.20983e+06	3539837	0.0447693	3.90206e+06	2.33054e+06	702684	59.7259	1.97055e+06	1.70341e+06	538665	86.4435	0.505001	-0.985641	0.317875	Down
A0A5C2GE58		IG c273_heavy_IGHV3-23_IGHD3-22_IGHJ5 (Fragment)		29900304	38180140	29980184	47805196	24209434	69380264	29429546	21995746	11613798	14838953	22969636	21302354	41465812	15094443	16963842	17518718	15884674	16007053	12973441	13780892	15766322	0.0379847	1.90661e+07	7.99997e+06	2.41208e+06	41.9591	3.17334e+07	1.69002e+07	5.34431e+06	53.2568	1.66439	0.73499	0.307729	Up
A0A5C2GE94		IG c1052_heavy_IGHV3-23_IGHD6-13_IGHJ4 (Fragment)		524761	250.019	70526.6	207518	294572	493374	395687	122763	324309	484106	398682	873217	331201	833006	247712	672435	727138	657270	676715	492980	474587	0.00325823	580449	204788	61745.9	35.2809	291787	186602	59008.6	63.9514	0.502691	-0.992256	0.167333	Down
A0A5C2GEU3		IG c810_heavy_IGHV3-49_IGHD7-27_IGHJ6 (Fragment)		95159.3	938674	1.25092e+06	995311	209089	1248185	86010.9	86595.4	201333	320013	1276691	1.41238e+06	1.48958e+06	819770	763848	657285	634196	519560	900331	825100	923235	0.047441	929271	323734	97609.4	34.8374	543129	500582	158298	92.1664	0.584468	-0.774804	0.324858	Down
A0A5C2GEX1		IG c711_heavy_IGHV1-18_IGHD3-22_IGHJ4 (Fragment)		250.019	250.019	250.019	250.019	250.019	250.019	250.019	250.019	250.019	250.019	250.019	38746.6	250.019	38085.8	84922.8	250.019	85896.1	250.019	250.019	70797.8	250.019	0.0217719	29086.3	36398.4	10974.5	125.139	250.019	0	0	0	0.00859577	-6.86216	0.25952	Down
A0A5C2GF83		IG c622_heavy_IGHV3-21_IGHD2-21_IGHJ4 (Fragment)		24485.5	178658	304017	27360.4	84441.2	404053	250.019	88710	114276	201206	253761	362240	998722	212136	358911	28265.5	433146	415702	414281	25409.5	266514	0.041694	342644	260758	78621.5	76.1016	142746	130695	41329.5	91.5581	0.4166	-1.26327	0.314661	Down
A0A5C2GF93		IGL c49_light_IGKV4-1_IGKJ4 (Fragment)		279475	115398	44264.7	189593	257132	16788.6	57389.7	141645	378783	494930	67103.7	140713	147669	577280	661030	998772	874965	1.19728e+06	718847	42507.6	738882	0.0151526	560459	402759	121436	71.8623	197540	155383	49136.5	78.6592	0.35246	-1.50447	0.244207	Down
A0A5C2GFF3		IG c1142_heavy_IGHV3-73_IGHD3-22_IGHJ4 (Fragment)		546740	477942	2.73772e+06	1.29598e+06	1.23638e+06	2.19848e+06	874499	1.59917e+06	438282	2.00648e+06	971421	401719	116753	773478	420323	155501	127143	467500	811970	510313	747721	0.00383776	500349	296221	89313.9	59.2028	1.34117e+06	789995	249818	58.9035	2.68046	1.42248	0.174118	Up
A0A5C2GFQ3		IG c822_heavy_IGHV3-30_IGHD2-2_IGHJ6 (Fragment)		77450.3	250.019	250.019	151838	240933	323720	175386	84551.6	250.019	250.019	40206	14841.2	250.019	4525.9	39459	61327.7	13577.2	2153.17	10461.3	250.019	11377.6	0.0221079	18039	20059.6	6048.21	111.201	105488	114760	36290.3	108.79	5.84776	2.54788	0.25952	Up
A0A5C2GFX4		IGH + IGL c71_light_IGKV1-9_IGKJ2 (Fragment)		224487	132677	42159.8	98180.7	73887	120928	192077	148170	281141	685214	177725	250.019	173732	376572	346738	459566	1.05381e+06	530795	495447	780794	1.04022e+06	0.026343	494150	343279	103503	69.4686	199892	184793	58436.6	92.4462	0.404517	-1.30573	0.272527	Down
A0A5C2GG46		IGL c389_light_IGKV1D-39_IGKJ1 (Fragment)		25674.1	84067	1781.06	16778.7	12951.5	34377.5	6046.6	35502.4	6930.15	79653.6	106196	78791.3	197729	121791	127367	78496.8	51258.9	70891.1	131685	107049	93792.6	9.55149e-05	105913	39567.6	11930.1	37.3584	30376.3	29483	9323.33	97.0592	0.286803	-1.80187	0.0357259	Down
A0A5C2GG67		IGH + IGL c171_light_IGKV1D-39_IGKJ1 (Fragment)		1.66893e+06	3.50172e+06	222940	187983	600853	121337	1.82247e+06	566316	647298	2.6396e+06	2.7387e+06	1.61396e+06	2434060	1.51096e+06	1.64061e+06	1.09609e+06	1.43915e+06	4.39913e+06	2.0987e+06	5116389	2.16451e+06	0.0384754	2.38657e+06	1.27451e+06	384279	53.4034	1.19794e+06	1.16362e+06	367968	97.1345	0.501953	-0.994376	0.308328	Down
A0A5C2GG81		IG c542_heavy_IGHV3-53_IGHD3-10_IGHJ6 (Fragment)		94133.2	199571	250.019	5711.9	51969.8	27564.1	10541	59679.7	250.019	250.019	250.019	250.019	250.019	250.019	250.019	250.019	250.019	250.019	250.019	250.019	250.019	0.0288095	250.019	0	0	0	44992	62904.6	19892.2	139.813	179.954	7.49149	0.283795	Up
A0A5C2GG87		IGH + IGL c399_light_IGLV1-40_IGLJ1 (Fragment)		309646	853294	130254	250.019	210021	242202	412630	760007	169977	221956	250.019	359558	250.019	39398.7	21373.6	250.019	250.019	250.019	335116	157278	226801	0.0255139	103707	141938	42795.8	136.864	331024	273657	86537.8	82.6698	3.19192	1.67442	0.267803	Up
A0A5C2GGA2		IG c1149_heavy_IGHV3-64_IGHD1-26_IGHJ5 (Fragment)		2976297	1986208	1567521	1.83022e+06	1.236e+06	894738	2.85515e+06	547113	3855314	386736	1171563	675765	1.10549e+06	1.02317e+06	250.019	834585	1.17708e+06	1.30289e+06	783997	453978	1.11066e+06	0.0178381	876312	385350	116187	43.9741	1.81353e+06	1.13106e+06	357674	62.3681	2.0695	1.04928	0.250256	Up
A0A5C2GGB8		IG c265_heavy_IGHV3-23_IGHD2-21_IGHJ6 (Fragment)		250.019	250.019	250.019	250.019	219249	250.019	207708	250.019	250.019	191829	250.019	250.019	250.019	241854	368630	247014	415217	184536	1.33548e+06	279581	474280	0.046871	322486	374768	112997	116.212	62053.6	99724.6	31535.7	160.707	0.192423	-2.37765	0.324295	Down
A0A5C2GGH1		IG c1213_heavy_IGHV3-11_IGHD3-22_IGHJ6 (Fragment)		250.019	242837	250.019	54552.8	68948.9	28487.2	208506	116737	250.019	21177.8	20266.4	10228.2	250.019	250.019	250.019	19276.4	250.019	107173	250.019	250.019	250.019	0.0486287	14426.7	31755.3	9574.57	220.114	74199.7	88195.8	27890	118.863	5.14321	2.36267	0.329491	Up
A0A5C2GGH2		IGL c519_light_IGKV1D-39_IGKJ4 (Fragment)		6118383	11745349	19861898	11329.3	7.23161e+06	1.25825e+06	36742.4	2.92736e+06	4.50623e+06	6.84065e+06	9848974	9263127	24877808	10942785	8764576	9516844	16685052	10591484	9588430	11680538	9129126	0.024165	1.1899e+07	4.83413e+06	1.45754e+06	40.6264	6.05378e+06	6.08232e+06	1.9234e+06	100.471	0.508765	-0.974929	0.266243	Down
A0A5C2GGH4		IG c478_heavy_IGHV5-51_IGHD2-2_IGHJ4 (Fragment)		27411.8	42237.6	18825.5	40525.5	12801.4	47432.8	18104.6	52981.1	250.019	250.019	26666.8	13709.4	17155	250.019	250.019	250.019	250.019	250.019	250.019	250.019	250.019	0.00470288	5411.94	9336.38	2815.02	172.515	26082	19084.8	6035.13	73.1722	4.81935	2.26884	0.174118	Up
A0A5C2GGI7		IGH + IGL c519_light_IGKV1-5_IGKJ4 (Fragment)		32980.1	98661.9	72748.8	524355	103276	514438	1.13485e+06	100480	673948	1.12901e+06	235788	195659	76733.8	1.42947e+06	1.42692e+06	585705	2.06099e+06	1.66753e+06	1214991	1.67058e+06	1.51936e+06	0.0184185	1.09852e+06	696556	210020	63.4086	438475	430842	136244	98.2593	0.39915	-1.325	0.254421	Down
A0A5C2GGP0		IGH + IGL c589_light_IGKV1D-33_IGKJ4 (Fragment)		10343.5	432017	34080.2	10540.6	27085.4	46593.2	18069.9	36591.9	368488	201842	659692	182424	282337	405437	334161	460565	377576	429676	709518	147656	414095	0.00102119	400285	172545	52024.2	43.1054	118565	159351	50391.2	134.4	0.296202	-1.75535	0.122373	Down
A0A5C2GGQ2		IGH + IGL c361_light_IGLV3-19_IGLJ1 (Fragment)		250.019	93964.7	83139.3	250.019	250.019	200816	250.019	250.019	1.21896e+06	1.00426e+06	183223	1.00474e+06	133656	872374	1.56999e+06	584258	530607	1.38456e+06	1.15927e+06	1194589	1.40862e+06	0.00555428	911445	494356	149054	54.2387	260239	456219	144269	175.308	0.285523	-1.80832	0.184329	Down
A0A5C2GGR8		IG c712_heavy_IGHV3-30_IGHD6-19_IGHJ4 (Fragment)		150788	250.019	102363	105065	397167	2.96196e+06	2492901	4.91993e+06	2.34305e+06	3.73464e+06	4.12207e+06	3113427	2.58033e+06	4596025	3.36802e+06	4873112	4.76296e+06	4.05351e+06	4634557	3.88348e+06	2.39313e+06	0.00238798	3.85278e+06	876253	264200	22.7434	1.72081e+06	1.80188e+06	569805	104.711	0.446641	-1.16281	0.157625	Down
A0A5C2GGY7		IG c441_heavy_IGHV4-39_IGHD3-9_IGHJ4 (Fragment)		672143	730769	449349	1.07591e+06	1.11789e+06	853280	968898	1.38554e+06	138923	216882	348621	340822	695046	43261.8	250.019	22790.4	57580.3	250.019	135260	161409	129017	0.000453677	175846	211505	63771.2	120.279	760959	402397	127249	52.8802	4.32741	2.1135	0.100367	Up
A0A5C2GH20		IG c188_heavy_IGHV3-30_IGHD3-22_IGHJ5 (Fragment)		64133.7	431768	237636	274342	51945.4	136101	19876.8	101917	15629.4	195443	83184.7	190901	134827	32098.9	73437.3	39850.6	250.019	55096.4	250.019	250.019	250.019	0.0416185	55490.5	62223.2	18761	112.133	152879	132915	42031.3	86.9409	2.75505	1.46208	0.314661	Up
A0A5C2GH36		IG c401_light_IGKV3-20_IGKJ4 (Fragment)		1.91115e+06	873424	1.28331e+06	1.9932e+06	1.431e+06	295279	2.06723e+06	686700	1.3693e+06	899203	797929	942156	1.81321e+06	3.96082e+06	2.46733e+06	1.86288e+06	1.91721e+06	2.34106e+06	3.47292e+06	800238	2.73454e+06	0.0417152	2.10093e+06	1.04118e+06	313926	49.5578	1.28098e+06	595307	188253	46.4728	0.609719	-0.713782	0.314661	Down
A0A5C2GHA7		IG c248_heavy_IGHV3-9_IGHD1-26_IGHJ3 (Fragment)		30095.4	250.019	131332	250.019	53550.9	63729.1	118720	33711.9	37858.7	250.019	250.019	37286	250.019	1588.16	250.019	250.019	12970.7	250.019	66839.5	250.019	9068.44	0.0360871	11750.3	21429.8	6461.34	182.378	46974.8	46763	14787.8	99.5491	3.99777	1.99919	0.302652	Up
A0A5C2GHI6		IG c437_heavy_IGHV3-74_IGHD5-24_IGHJ6 (Fragment)		371687	529685	413675	165545	196467	282358	289716	250.019	255606	193629	931951	397059	673114	685373	1.02212e+06	703675	926571	297951	389466	143145	885753	0.00191014	641471	294382	88759.5	45.8917	269862	146849	46437.9	54.4165	0.420692	-1.24916	0.144568	Down
A0A5C2GHI9		IG c586_heavy_IGHV4-34_IGHD2-21_IGHJ3 (Fragment)		93408.3	250.019	17210.2	70274.9	10124.4	43217.3	26825.7	80350.7	250.019	7191.29	250.019	250.019	5330.62	26877.2	250.019	250.019	30607.7	250.019	250.019	250.019	250.019	0.0171149	5892.34	11429	3445.97	193.963	34910.3	34913.4	11040.6	100.009	5.92469	2.56674	0.245283	Up
A0A5C2GHJ3		IGH + IGL c205_heavy_IGHV3-48_IGHD5-24_IGHJ1 (Fragment)		2.26475e+06	661491	128675	131054	2.22378e+06	407611	1.2937e+06	1.43573e+06	440884	544271	240831	314221	255965	250.019	264235	250.019	250.019	111828	579538	234219	126368	0.00650175	193451	173094	52189.9	89.4773	953195	806332	254985	84.5925	4.92733	2.30081	0.193742	Up
A0A5C2GHN2		IG c1239_light_IGKV3-15_IGKJ2 (Fragment)		709625	502236	708114	417606	105293	425116	77201.6	355874	852072	959001	394255	457784	592318	702983	948886	702820	1.25375e+06	860452	1.85803e+06	942486	793316	0.0367497	864281	408629	123206	47.2797	511214	295965	93592.4	57.8946	0.591491	-0.757573	0.303608	Down
A0A5C2GHS2		IG c34_heavy_IGHV4-34_IGHD6-13_IGHJ4 (Fragment)		295618	16886.2	206657	63085.6	104554	85704.4	81593.9	505184	221900	250.019	250.019	186713	250.019	250.019	250.019	250.019	250.019	250.019	250.019	250.019	250.019	0.010488	17201.2	56220.6	16951.2	326.842	158143	154076	48723	97.4278	9.19375	3.20065	0.219503	Up
A0A5C2GI06		IG c15_light_IGKV3-20_IGKJ1 (Fragment)		3021556	1.08398e+06	781304	1.54627e+06	1944666	1.17205e+06	1.46819e+06	1.40421e+06	2103941	3.1041e+06	1.90684e+06	1.95658e+06	1.59249e+06	3.57927e+06	4744615	4701841	3.91601e+06	4.27069e+06	5.00906e+06	5.03759e+06	4.08496e+06	0.000606572	3.70909e+06	1.29725e+06	391134	34.9748	1.76303e+06	786581	248739	44.6154	0.475327	-1.07301	0.122373	Down
A0A5C2GI43		IG c1304_light_IGKV1-9_IGKJ2 (Fragment)		312503	250.019	250.019	250.019	316068	250.019	250.019	763922	752450	45861.8	788413	669534	250.019	597840	1.26306e+06	851698	1.54171e+06	250.019	621526	550253	1.51563e+06	0.00966283	763651	519257	156562	67.9966	219205	310717	98257.5	141.747	0.287049	-1.80063	0.219503	Down
A0A5C2GIA3		IG c505_light_IGKV3-15_IGKJ1 (Fragment)		271769	303466	352084	605668	260190	263746	127175	55037.1	250.019	250.019	33045.4	182969	209456	250.019	250.019	250.019	250.019	250.019	250.019	250.019	250.019	0.00701483	38861	78632.1	23708.5	202.342	223964	186075	58841.9	83.0825	5.7632	2.52687	0.201747	Up
A0A5C2GIF9		IG c146_light_IGKV1-5_IGKJ2 (Fragment)		854182	250.019	250.019	357049	250.019	9039.4	61940.3	27465.4	2091510	1761410	1.22167e+06	836204	37209	1.60744e+06	2.1759e+06	2.0888e+06	2.53247e+06	1.18204e+06	1.46014e+06	1298587	1.59383e+06	0.00878667	1.45766e+06	683467	206073	46.8878	516335	793918	251059	153.76	0.354221	-1.49728	0.219503	Down
A0A5C2GIJ6		IG c715_heavy_IGHV3-11_IGHD4-17_IGHJ2 (Fragment)		758278	1.08804e+06	553819	250.019	1.49558e+06	772467	429355	1.52214e+06	1.1393e+06	250.019	153643	470754	1.65155e+06	250.019	250.019	250.019	250.019	250.019	250.019	250.019	584072	0.0367611	260161	506898	152836	194.84	775947	545415	172475	70.2902	2.98256	1.57655	0.303608	Up
A0A5C2GIL0		IG c964_light_IGKV3-15_IGKJ3 (Fragment)		953682	898075	1.85795e+06	1.11405e+06	1.23972e+06	250.019	731729	1.07283e+06	250.019	250.019	879880	487753	817378	250.019	250.019	250.019	250.019	250.019	250.019	250.019	250.019	0.0138839	198819	352899	106403	177.498	786879	618299	195523	78.5762	3.95776	1.98468	0.241774	Up
A0A5C2GJ13		IG c501_heavy_IGHV3-23_IGHD3-16_IGHJ5 (Fragment)		271011	188183	35349.2	28588.4	157348	25848.2	48917.7	162313	250.019	13446.3	250.019	30178.9	11024.5	13791	5915.06	10285.3	250.019	32137.5	250.019	12941.3	31492	0.0112585	13501.4	12451.2	3754.19	92.2216	93125.5	93421.9	29542.6	100.318	6.89746	2.78606	0.220666	Up
A0A5C2GJ23		IG c428_light_IGKV2-30_IGKJ2 (Fragment)		7464204	3439343	2.5423e+06	2.04247e+06	2268388	4.68932e+06	2.9937e+06	1.82419e+06	3.2761e+06	1.99995e+06	1.26178e+06	2.17073e+06	1.73157e+06	250.019	250.019	2.75219e+06	250.019	250.019	2.01728e+06	2.39883e+06	250.019	0.00305259	1.12124e+06	1.13454e+06	342078	101.187	3.254e+06	1.71436e+06	542129	52.6848	2.90214	1.53712	0.167333	Up
A0A5C2GJ36		IG c844_light_IGKV2D-29_IGKJ4 (Fragment)		47821.6	54420.9	28412.9	43834.3	31645.5	46111.2	20636.4	20374.8	250.019	250.019	626.557	2487.28	571.789	250.019	250.019	250.019	250.019	250.019	250.019	250.019	250.019	8.02678e-05	516.89	668.375	201.523	129.307	29375.8	19197	6070.62	65.3498	56.8318	5.82863	0.0357259	Up
A0A5C2GJ52		IG c1284_light_IGKV1-5_IGKJ2 (Fragment)		250.019	250.019	29457.2	250.019	11184.8	2582.87	8711	9840.45	50368.7	32338.4	250.019	106651	53630.9	58388.4	250.019	107094	64012.9	59376.5	16203.8	243949	234195	0.0164106	85818.3	83881.3	25291.2	97.7428	14523.3	17146.1	5422.07	118.059	0.169234	-2.56291	0.244207	Down
A0A5C2GJ56		IG c891_light_IGKV3-20_IGKJ5 (Fragment)		250.019	250.019	250.019	241192	1.58607e+06	250.019	250.019	910966	250.019	755504	656796	250.019	502311	435090	861734	2475762	1.35203e+06	1.36487e+06	1.42041e+06	1.26744e+06	1.23022e+06	0.0169671	1.05154e+06	664094	200232	63.1545	349523	553050	174890	158.23	0.332392	-1.58904	0.245283	Down
A0A5C2GJJ4		IG c470_light_IGKV3-20_IGKJ2 (Fragment)		16964.3	250.019	250.019	250.019	47348.8	17879.9	250.019	250.019	47932.1	46841.8	250.019	250.019	7566.88	44693.1	108617	56144.4	83676.8	45473.5	63196	62986.8	47941.1	0.0303483	47345.1	34171.2	10303	72.1748	17821.7	21512.8	6802.95	120.711	0.376421	-1.40958	0.284305	Down
A0A5C2GJK7		IG c545_heavy_IGHV3-48_IGHD2-8_IGHJ3 (Fragment)		250.019	250.019	250.019	1604.08	106449	250.019	250.019	287901	142286	218328	31658.3	250.019	87130.3	125389	133876	482617	282905	227549	345989	253896	313803	0.0310889	207733	146606	44203.4	70.5743	75781.7	107860	34108.4	142.33	0.364804	-1.45481	0.286731	Down
A0A5C2GJR5		IG c837_light_IGKV1-39_IGKJ2 (Fragment)		1.49547e+06	989057	1.04793e+06	1.03074e+06	1.05788e+06	982135	159243	1.30607e+06	2.61865e+06	891666	11341819	2.30842e+06	3.44596e+06	3.98144e+06	3.5706e+06	5136896	10203715	2976195	5384416	3.36913e+06	538508	0.00284969	4.75064e+06	3.25854e+06	982486	68.5915	1.15788e+06	617843	195379	53.3596	0.243732	-2.03663	0.167333	Down
A0A5C2GJY0		IG c758_light_IGKV3-20_IGKJ3 (Fragment)		260971	48697.1	45797.3	446517	440423	374704	236457	685815	435864	560847	220954	519573	408048	355203	963089	879485	738233	1.17323e+06	1.22486e+06	741483	512480	0.0101013	703331	332452	100238	47.2682	353609	207288	65550.1	58.6206	0.502764	-0.992048	0.219503	Down
A0A5C2GK02		IG c386_light_IGKV1-9_IGKJ3 (Fragment)		39650	53904.5	250.019	305509	957414	148698	24605.1	19302.8	828478	346334	52053.9	40122.1	58812.5	2289989	2.06997e+06	738994	276921	1.47878e+06	1.32498e+06	1.6496e+06	1.77765e+06	0.01351	1.0689e+06	861105	259633	80.5601	272415	349884	110643	128.438	0.254856	-1.97225	0.241629	Down
A0A5C2GK15		IG c473_light_IGKV1-5_IGKJ2 (Fragment)		250.019	250.019	250.019	250.019	250.019	250.019	250.019	250.019	335569	250.019	250.019	250.019	250.019	269616	291216	474697	250.019	250.019	853065	477451	276731	0.0407081	240366	279206	84183.9	116.159	33781.9	106037	33531.9	313.887	0.140544	-2.83091	0.314661	Down
A0A5C2GK44		IG c128_light_IGLV3-25_IGLJ2 (Fragment)		116235	250.019	250.019	250.019	147657	250.019	356625	251194	250.019	232360	250.019	250.019	14570	250.019	250.019	250.019	250.019	250.019	250.019	250.019	98374.6	0.0241833	10472.2	29468.7	8885.15	281.398	110532	132250	41821.2	119.649	10.5548	3.39982	0.266243	Up
A0A5C2GK54		IG c292_light_IGKV4-1_IGKJ2 (Fragment)		250.019	250.019	250.019	250.019	4433.29	250.019	250.019	4908.25	4255.21	250.019	250.019	250.019	250.019	7301.1	5912.91	250.019	21572	10540.9	7592.95	8142.3	5705.2	0.0409283	6160.67	6355.98	1916.4	103.17	1534.69	2074.62	656.054	135.182	0.249111	-2.00514	0.314661	Down
A0A5C2GKD2		IGH + IGL c487_light_IGKV1-12_IGKJ3 (Fragment)		235186	4442.33	250.019	5580.85	186822	7049.54	43618.6	21173.6	812835	944502	746919	626011	117543	511902	1.08007e+06	1.68442e+06	1.2766e+06	700084	1.00556e+06	675470	1.11288e+06	0.00138185	867042	422590	127416	48.7392	226146	354970	112251	156.965	0.260825	-1.93885	0.127962	Down
A0A5C2GKD4		IG c419_light_IGKV1-33_IGKJ2 (Fragment)		5198.43	15965.6	9671.26	6452	53178.9	58707.1	11275.8	12829.9	250.019	250.019	2027.04	250.019	3286.9	250.019	250.019	250.019	250.019	250.019	250.019	250.019	250.019	0.0160977	687.647	1013.6	305.61	147.401	17377.9	20985.6	6636.24	120.76	25.2716	4.65944	0.244207	Up
A0A5C2GKD9		IG c15_heavy_IGHV3-74_IGHD3-9_IGHJ4 (Fragment)		518871	307707	307367	121140	328052	93727.7	97580.9	319923	795632	1089250	207381	250734	170284	1.23595e+06	652349	1.21638e+06	1.77584e+06	922987	1.98364e+06	613969	1.25943e+06	0.0240917	935359	620258	187015	66.3123	397925	322729	102056	81.1031	0.425425	-1.23302	0.266243	Down
A0A5C2GKG0		IG c472_light_IGKV3D-15_IGKJ4 (Fragment)		2.18025e+06	1.8699e+06	1.79958e+06	1.46018e+06	2.94261e+06	250.019	3.51076e+06	4968055	250.019	2.00005e+06	250.019	250.019	1349238	2534380	1.41415e+06	250.019	250.019	250.019	250.019	250.019	250.019	0.00735333	481797	876922	264402	182.011	2.07319e+06	1.50206e+06	474993	72.4517	4.30304	2.10536	0.205322	Up
A0A5C2GKH6		IG c1226_heavy_IGHV3-53_IGHD5-12_IGHJ4 (Fragment)		785.65	183527	549374	4303.6	3789.34	4632.63	589.841	4792.44	108507	61979	132498	31841.5	7827.32	258445	302097	513388	162669	355461	539875	307238	684035	0.0252759	299579	214384	64639.2	71.5617	92228.1	171959	54378.1	186.449	0.307859	-1.69966	0.266277	Down
A0A5C2GKL0		IG c1314_light_IGKV1-12_IGKJ4 (Fragment)		7032.62	250.019	250.019	7727.76	5033.84	4357.1	6521.35	27209.9	73539.1	15894.9	45385.4	15432.3	73220.9	29364.3	250.019	36845.4	68894.7	97555.2	64213.5	50796.8	250.019	0.024693	43837.1	31157.3	9394.29	71.0752	14781.7	22141.5	7001.75	149.79	0.337195	-1.56835	0.266243	Down
A0A5C2GL78		IG c952_light_IGKV3-11_IGKJ5 (Fragment)		781054	1.22223e+06	1551203	1323308	761350	717668	691274	797936	753236	502985	560820	588827	679002	603218	480341	404248	750682	318079	504259	986939	543920	0.0107615	583667	179397	54090.2	30.7362	910225	334299	105715	36.7271	1.55949	0.641077	0.219503	Up
A0A5C2GL81		IG c325_heavy_IGHV5-51_IGHD5-24_IGHJ4 (Fragment)		1.92722e+06	250.019	250.019	250.019	1.18581e+06	1.35591e+06	1.00818e+06	1.63888e+06	941731	464736	1.3629e+06	1.51337e+06	1.7877e+06	1.32707e+06	2122972	642030	3.12065e+06	1.46619e+06	2376140	999972	1.39484e+06	0.0169817	1.64671e+06	683773	206165	41.5235	852321	707066	223594	82.9576	0.51759	-0.950119	0.245283	Down
A0A5C2GLB9		IG c824_light_IGLV1-44_IGLJ2 (Fragment)		250.019	250.019	250.019	250.019	541570	250.019	63273.1	250.019	2.05325e+06	250.019	130279	250.019	250.019	6.39295e+06	250.019	197293	5607681	250.019	7268168	2863164	4.99441e+06	0.0330102	2.4959e+06	2.99691e+06	903604	120.073	265984	650270	205633	244.477	0.106568	-3.23015	0.291291	Down
A0A5C2GLG1		IG c899_heavy_IGHV4-39_IGHD7-27_IGHJ3 (Fragment)		490618	199930	245629	476075	332925	664235	206646	443875	615071	250.019	295810	155508	156039	250.019	250.019	250.019	345294	250.019	250.019	462742	340231	0.0220645	159716	174513	52617.8	109.265	367525	207364	65574.1	56.4216	2.30112	1.20234	0.25952	Up
A0A5C2GLG3		IG c1011_light_IGKV3-20_IGKJ5 (Fragment)		1.61574e+06	356934	1.43764e+06	226572	951159	3096974	1.38485e+06	532908	1.91721e+06	669236	3502299	3386285	2.21154e+06	1.83813e+06	1.82734e+06	2075917	2.3306e+06	2.56043e+06	1.28849e+06	1.89145e+06	1.39681e+06	0.00995722	2.20993e+06	714539	215442	32.3331	1.21892e+06	870490	275273	71.4147	0.551565	-0.858397	0.219503	Down
A0A5C2GLU6		IG c166_light_IGKV4-1_IGKJ2 (Fragment)		11446.3	8929.73	250.019	250.019	250.019	250.019	10776.8	30502.6	250.019	12519.8	250.019	250.019	250.019	250.019	250.019	250.019	250.019	250.019	250.019	250.019	1976.58	0.0244406	406.979	520.576	156.96	127.912	7542.53	9692.3	3064.97	128.502	18.533	4.21202	0.266243	Up
A0A5C2GM09		IG c328_heavy_IGHV6-1_IGHD6-13_IGHJ4 (Fragment)		2.28743e+06	431041	1.946e+06	1.13765e+06	3.06356e+06	986878	4830054	10301126	81314.7	250.019	1.10779e+06	615920	666044	250.019	110428	250.019	250.019	18072.4	99308.6	250.019	242285	0.0280976	260077	372453	112299	143.209	2.50653e+06	3.11771e+06	985906	124.383	9.63764	3.26868	0.282108	Up
A0A5C2GM25		IG c155_light_IGKV3-20_IGKJ3 (Fragment)		2.75002e+06	658793	1.0457e+06	167709	1.87267e+06	1.23397e+06	123889	995316	2563104	3900610	890048	1.80381e+06	1.31373e+06	2.22053e+06	2660485	2.26456e+06	3795693	3007143	3.6545e+06	2.61891e+06	4469963	0.0452432	2.60903e+06	1.08056e+06	325802	41.4162	1.53118e+06	1.22443e+06	387198	79.9664	0.586876	-0.768873	0.319451	Down
A0A5C2GM85		IG c631_light_IGKV1-12_IGKJ1 (Fragment)		250.019	250.019	250.019	250.019	250.019	250.019	250.019	250.019	167283	79999	250.019	250.019	250.019	200263	220674	194828	195216	152528	68722.8	49676	56039.6	0.0280952	103518	89771.7	27067.2	86.721	24928.2	55946.2	17691.7	224.429	0.240811	-2.05403	0.282108	Down
A0A5C2GM92		IG c871_light_IGKV3-20_IGKJ2 (Fragment)		169534	50761.5	184138	14308.5	321836	416796	35888.3	375685	217033	90299.5	256629	656116	334808	958374	1.52056e+06	459856	23829.4	374735	1.05386e+06	1193352	886890	0.00305066	701728	457834	138042	65.2438	187628	144672	45749.3	77.1057	0.26738	-1.90304	0.167333	Down
A0A5C2GMH6		IG c556_heavy_IGHV1-46_IGHD3-22_IGHJ6 (Fragment)		250.019	250.019	17873.2	9125.44	5107.64	250.019	250.019	250.019	14559.5	250.019	8929.48	1683.46	70355.8	250.019	345346	169418	107946	2626.15	226775	22650.9	180379	0.0141037	103306	114779	34607.2	111.107	4816.59	6742.66	2132.22	139.988	0.0466247	-4.42276	0.241774	Down
A0A5C2GMH8		IG c377_light_IGKV4-1_IGKJ4 (Fragment)		21107	250.019	37975.1	47863.2	250.019	81917.7	250.019	72476.2	250.019	250.019	250.019	250.019	15374.8	250.019	250.019	250.019	250.019	250.019	250.019	250.019	250.019	0.0205188	1625	4560.3	1374.98	280.634	26258.9	32053.4	10136.2	122.067	16.1593	4.01429	0.25952	Up
A0A5C2GN30		IG c862_heavy_IGHV3-9_IGHD2-21_IGHJ3 (Fragment)		250.019	540701	225853	471608	37493.2	188242	250.019	66906.1	9976.39	33318.3	250.019	250.019	250.019	23755.5	250.019	67297.3	8550.34	250.019	250.019	250.019	10675	0.024995	10184.4	20346.5	6134.71	199.782	157460	200103	63278.2	127.082	15.4609	3.95055	0.266243	Up
A0A5C2GN85		IG c1200_light_IGKV2D-28_IGKJ5 (Fragment)		7265159	6.61983e+06	5.00362e+06	4729170	5.83513e+06	6135794	4976310	4.95162e+06	840550	674704	4.5875e+06	3.43553e+06	2.39599e+06	1.04754e+06	250.019	1.35967e+06	250.019	250.019	1.4257e+06	3.7258e+06	250.019	0.00198422	1.63443e+06	1.67523e+06	505102	102.497	4.70319e+06	2.23474e+06	706688	47.5155	2.87757	1.52485	0.146323	Up
A0A5C2GNA0		IG c796_heavy_IGHV3-33_IGHD4-17_IGHJ4 (Fragment)		250.019	250.019	250.019	250.019	250.019	23238.1	250.019	250.019	849333	415215	50018.3	24206.4	250.019	1.65944e+06	363616	1.72874e+06	1408829	1.31972e+06	658876	960146	1.85668e+06	0.00480405	911866	725315	218691	79.5419	128954	284414	89939.5	220.555	0.141417	-2.82197	0.174118	Down
A0A5C2GNL8		IG c1073_heavy_IGHV3-23_IGHD6-19_IGHJ4 (Fragment)		94846.1	250.019	31246	12065.8	250.019	250.019	250.019	503.073	299830	95657.9	18705.8	17791.9	847.122	269900	94292.4	312189	208580	560445	172286	149899	595964	0.0315401	218264	205126	61847.8	93.9808	53514.9	94591.6	29912.5	176.758	0.245185	-2.02806	0.287754	Down
A0A5C2GNV1		IG c541_heavy_IGHV3-53_IGHD6-13_IGHJ6 (Fragment)		2.5209e+06	482199	411132	1.30893e+06	353859	1.44125e+06	2567108	1.18011e+06	107312	250.019	783327	250.019	742976	151476	250.019	419307	193584	250.019	164008	481202	269428	0.0207574	291460	282571	85198.2	96.9501	1.0373e+06	937277	296393	90.357	3.559	1.83147	0.25952	Up
A0A5C2GNY1		IG c260_heavy_IGHV4-59_IGHD3-10_IGHJ5 (Fragment)		9686.28	190617	265555	582500	348616	250.019	209004	753510	123638	41149.8	106243	250.019	250.019	39544.7	41703.7	116441	125813	250.019	43863.5	145047	198620	0.0339711	74366	67496.2	20350.9	90.7622	252453	249200	78803.8	98.7114	3.39473	1.7633	0.294856	Up
A0A5C2GP13		IG c38_heavy_IGHV3-74_IGHD2-15_IGHJ4 (Fragment)		34364.1	51830.8	120108	123427	90166.9	137933	81490.8	71237.8	306108	365289	292070	134476	166698	483465	370681	627191	467076	395690	674352	676695	741981	0.000364836	457307	208134	62754.7	45.5129	138196	109826	34730.2	79.4718	0.302194	-1.72645	0.0874389	Down
A0A5C2GP67		IG c633_heavy_IGHV3-21_IGHD6-19_IGHJ6 (Fragment)		16179.9	88806.8	10156.6	19915.5	250.019	5224.58	250.019	117172	32296.5	228182	147910	203411	5333.53	141285	324419	111686	143753	103878	110674	455026	144437	0.0139407	171983	121334	36583.6	70.5502	51843.4	73513.1	23246.9	141.798	0.301445	-1.73003	0.241774	Down
A0A5C2GPA5		IG c1078_heavy_IGHV3-23_IGHD4-17_IGHJ4 (Fragment)		193377	250.019	250.019	28689.3	114539	8892.77	250.019	19692.4	108024	39227.5	128625	117138	135456	332809	122282	284119	163186	229038	330733	257013	17662.1	0.00133828	192551	101024	30459.7	52.4659	51319.3	65553.6	20729.9	127.737	0.266523	-1.90767	0.127962	Down
A0A5C2GPI3		IG c1292_heavy_IGHV3-30_IGHD1-7_IGHJ6 (Fragment)		287550	250.019	2999.16	250.019	24869.9	250.019	4700.92	640621	1.20445e+06	826330	1455.35	1.12754e+06	250.019	1828989	49891.7	1.36651e+06	2343584	1.82724e+06	651243	418066	1.07368e+06	0.0321172	971677	817529	246494	84.1359	299227	438670	138720	146.601	0.307949	-1.69924	0.287754	Down
A0A5C2GPR1		IG c684_heavy_IGHV1-24_IGHD1-14_IGHJ4 (Fragment)		250.019	250.019	6039.78	9452.88	250.019	250.019	8346.93	53379.8	198168	250.019	141797	19077.9	14954.3	33163.1	98857.6	39958.4	300620	242968	149836	52090.9	101526	0.0327043	108623	93943.1	28324.9	86.4857	27663.7	62060	19625.1	224.337	0.254678	-1.97326	0.29101	Down
A0A5C2GPT2		IG c1030_heavy_IGHV4-4_IGHD3-22_IGHJ4 (Fragment)		53473	44711	250.019	82140.1	74023.2	250.019	250.019	107766	92273.4	54583.9	250.019	250.019	250.019	250.019	250.019	250.019	250.019	29196.6	250.019	250.019	77740	0.00930519	9926.07	24109.6	7269.31	242.891	50972.1	39736.4	12565.8	77.9572	5.13517	2.36041	0.219503	Up
A0A5C2GPW8		IG c1212_light_IGKV3-20_IGKJ2 (Fragment)		174187168	136973168	77625896	81155344	175205728	99798800	154821024	169736016	42300104	43218696	91423456	104733240	82818368	35422600	54913524	36525340	43276112	61192368	50271344	45554200	52808464	0.00510759	5.99035e+07	2.30786e+07	6.95845e+06	38.5262	1.15502e+08	5.31257e+07	1.67998e+07	45.9954	1.92814	0.947207	0.179331	Up
A0A5C2GQF4		IG c1133_heavy_IGHV4-31_IGHD6-13_IGHJ4 (Fragment)		250.019	250.019	250.019	25320.9	74961	250.019	6371.9	87913	250.019	22304.4	250.019	250.019	250.019	250.019	250.019	250.019	2762.84	250.019	250.019	5670.55	250.019	0.0492886	971.233	1731.32	522.014	178.26	21812.1	32947.3	10418.8	151.05	22.4582	4.48917	0.329491	Up
A0A5C2GQG7		IG c1636_heavy_IGHV4-34_IGHD3-10_IGHJ6 (Fragment)		271604	198609	749617	525564	182041	393011	387942	646844	250.019	250.019	27875.2	167823	339676	250.019	250.019	60963	12285.6	69745.1	250.019	178336	210233	0.0107126	97062.4	111992	33766.9	115.382	335573	254245	80399.4	75.7645	3.45729	1.78964	0.219503	Up
A0A5C2GQH3		IG c790_heavy_IGHV2-5_IGHD3-22_IGHJ4 (Fragment)		71132.6	118770	250.019	250.019	124565	250.019	144922	250.019	250.019	20819	250.019	250.019	250.019	10788.1	5483.19	39799	250.019	250.019	250.019	16612.9	24674.9	0.0494924	8987.11	13142.2	3962.52	146.234	48145.9	60496.6	19130.7	125.653	5.35722	2.42149	0.329491	Up
A0A5C2GQY4		IG c950_heavy_IGHV4-39_IGHD2-2_IGHJ5 (Fragment)		47485	15605.7	250.019	64841	31689.9	250.019	23567.8	37070.2	75643.5	250.019	3806.27	2820.56	17731.8	250.019	250.019	250.019	250.019	250.019	250.019	250.019	679.42	0.00387911	2435.29	5220.37	1574	214.363	29665.3	26994.7	8536.47	90.9975	12.1814	3.60661	0.174118	Up
A0A5C2GRC6		IG c15_light_IGKV3D-15_IGKJ1 (Fragment)		250.019	250.019	250.019	5466	250.019	250.019	3652.24	250.019	95866.6	134262	250.019	250.019	250.019	51197.4	127081	92312.2	84029.5	62970.2	77121.2	190493	157385	0.0488382	76667.2	63771.1	19227.7	83.1791	24074.7	48835.6	15443.2	202.851	0.314015	-1.67109	0.329491	Down
A0A5C2GRD1		IG c1274_heavy_IGHV3-33_IGHD6-19_IGHJ4 (Fragment)		6219.73	10914.6	323020	70481.7	533641	6987.11	200043	17574.7	94910.4	282390	189264	187506	250.019	556488	664724	1.29303e+06	434454	1.31152e+06	533625	187406	617928	0.0158335	543290	431066	129971	79.3436	154618	177732	56203.9	114.949	0.284596	-1.81301	0.244207	Down
A0A5C2GRK1		IG c114_light_IGKV3-20_IGKJ1 (Fragment)		250.019	250.019	250.019	250.019	250.019	250.019	250.019	250.019	250.019	250.019	250.019	250.019	20156.4	40494.9	3601.56	250.019	132557	40879.2	84446.1	250.019	250.019	0.0479883	29398.7	43504	13117	147.979	250.019	0	0	0	0.00850444	-6.87757	0.326275	Down
A0A5C2GRQ1		IG c559_heavy_IGHV3-53_IGHD3-9_IGHJ2 (Fragment)		1.56397e+06	1522194	873937	1.18514e+06	338553	888423	224620	1.78483e+06	1.42613e+06	1.02172e+06	4639147	3.00853e+06	806994	1.90358e+06	1.34464e+06	4.35459e+06	681374	7543315	1.48614e+06	2.10942e+06	2.19944e+06	0.0233969	2.73429e+06	2.05524e+06	619680	75.1656	1.08295e+06	518684	164022	47.8955	0.396063	-1.3362	0.266243	Down
A0A5C2GRR4		IG c101_light_IGKV6D-21_IGKJ1 (Fragment)		5815970	1.94111e+06	6027857	1.95911e+06	4287339	2.28095e+06	3.09527e+06	3.8385e+06	972650	2.50337e+06	45955	2.42348e+06	912591	51650.7	2.50373e+06	4.12295e+06	1.42628e+06	250.019	250.019	250.019	3.60843e+06	0.0149046	1.37235e+06	1.55938e+06	470170	113.628	3.27221e+06	1.69327e+06	535459	51.747	2.38439	1.25362	0.244207	Up
A0A5C2GRT6		IG c1424_heavy_IGHV3-64_IGHD2-21_IGHJ4 (Fragment)		216012	66928.5	206198	95072.1	242237	733351	228926	580854	367071	3.41197e+06	1.17906e+06	385606	251494	1.11169e+06	4.09155e+06	2.8037e+06	2891453	551015	883749	2.29513e+06	2029984	0.044357	1.67949e+06	1.23472e+06	372283	73.5176	614862	1.00469e+06	317712	163.402	0.366099	-1.44969	0.317875	Down
A0A5C2GRU1		IG c224_light_IGKV4-1_IGKJ1 (Fragment)		39679128	2668872	3.69638e+06	4.46469e+06	17841662	6291675	7.10952e+06	16765589	3.85599e+06	5.27892e+06	1.21821e+06	1656462	250.019	1.48708e+06	4937880	6649355	902312	964668	3.67897e+06	4.63192e+06	8092540	0.0444839	3.11088e+06	2.66094e+06	802305	85.5368	1.07652e+07	1.14917e+07	3.63398e+06	106.748	3.46052	1.79099	0.317875	Up
A0A5C2GSB8		IG c271_light_IGLV1-40_IGLJ2 (Fragment)		16611.8	250.019	167235	272672	524319	250.019	250.019	64928.7	103462	46042.2	250.019	34338.1	398820	1.50066e+06	1.99139e+06	409531	332311	235370	486167	473377	442800	0.0356892	573183	612697	184735	106.894	119602	167165	52862.2	139.768	0.208663	-2.26075	0.302652	Down
A0A5C2GSC5		IG c395_light_IGLV3-19_IGLJ1 (Fragment)		250.019	250.019	250.019	250.019	250.019	250.019	80296	62867.9	1.02955e+06	471334	250.019	250.019	250.019	1.30261e+06	1.25566e+06	557684	1.53878e+06	854424	660338	1.31112e+06	1.34042e+06	0.00784835	801980	596596	179880	74.3904	164555	336938	106549	204.757	0.205186	-2.285	0.212031	Down
A0A5C2GSH7		IG c463_light_IGKV3-11_IGKJ4 (Fragment)		6864007	3.37266e+06	2.39186e+06	4.03912e+06	10336633	4134439	5717253	4507113	1.20994e+06	1.10334e+06	2246821	4322473	3020830	1.08955e+06	1.16369e+06	1.81337e+06	3.0585e+06	1.63692e+06	2.268e+06	1.39003e+06	3.93144e+06	0.0387072	2.35833e+06	1.09883e+06	331310	46.5936	4.36764e+06	2.77658e+06	878030	63.5716	1.852	0.889087	0.308371	Up
A0A5C2GSX9		IG c122_light_IGKV3-20_IGKJ1 (Fragment)		155008	250.019	250.019	55589	31876.3	9847.21	26478.9	43929.3	66586.1	73945.1	788384	849267	299111	707414	369004	242576	115542	49233.9	290246	74932.6	136134	0.00366634	356531	292167	88091.7	81.9471	46376	46255.2	14627.2	99.7397	0.130075	-2.94258	0.174118	Down
A0A5C2GT39		IG c1660_heavy_IGHV4-34_IGHD5-5_IGHJ6 (Fragment)		6.54755e+06	6837405	7907707	9534511	7.68748e+06	15637803	8234406	12507627	2302474	2367743	8.27465e+06	6.72504e+06	8876734	2.01741e+06	2.37801e+06	2.31832e+06	3062150	1.97182e+06	1.68598e+06	2.38773e+06	2.68263e+06	0.012819	3.85277e+06	2.70767e+06	816394	70.2786	7.95647e+06	4.06608e+06	1.28581e+06	51.104	2.06513	1.04623	0.233338	Up
A0A5C2GT47		IG c517_light_IGKV3-15_IGKJ1 (Fragment)		2.46536e+06	718063	1.21849e+06	866926	1.6226e+06	1.20296e+06	684250	84152.1	1724556	1.41288e+06	1.53764e+06	2.06664e+06	2.0207e+06	2.07712e+06	2.92451e+06	1.79331e+06	1.74117e+06	2.31645e+06	1.91998e+06	1584139	1.30322e+06	0.00691476	1.93499e+06	436753	131686	22.5713	1.20002e+06	662894	209626	55.2401	0.620171	-0.689263	0.200877	Down
[truncated: 136 more rows]
